# Supplementary material for: The Role of FveAFB5 in Auxin-Mediated Responses and Growth in Strawberries
Source: MDPI journal article supplement (doi:10.3390/plants13081142), 2024-04-19
Supplement: s1 [file s1]

---

**Supplementary Materials for**

**The Role of FveAFB5 in Auxin-Mediated Responses and Growth in Strawberries**

Xuhui Wang <sup>1,2</sup>, Shuo Feng <sup>2</sup>, Jiangshan Luo <sup>2</sup>, Shikui Song <sup>2</sup>, Juncheng Lin <sup>2</sup>, Yunhe Tian <sup>2</sup>,  
Tongda Xu <sup>2,\*</sup> and Jun Ma <sup>2,\*</sup>

**This file includes:**

Supplementary Figures S1 to S7

Supplementary Table Sets

**Supplementary figures**



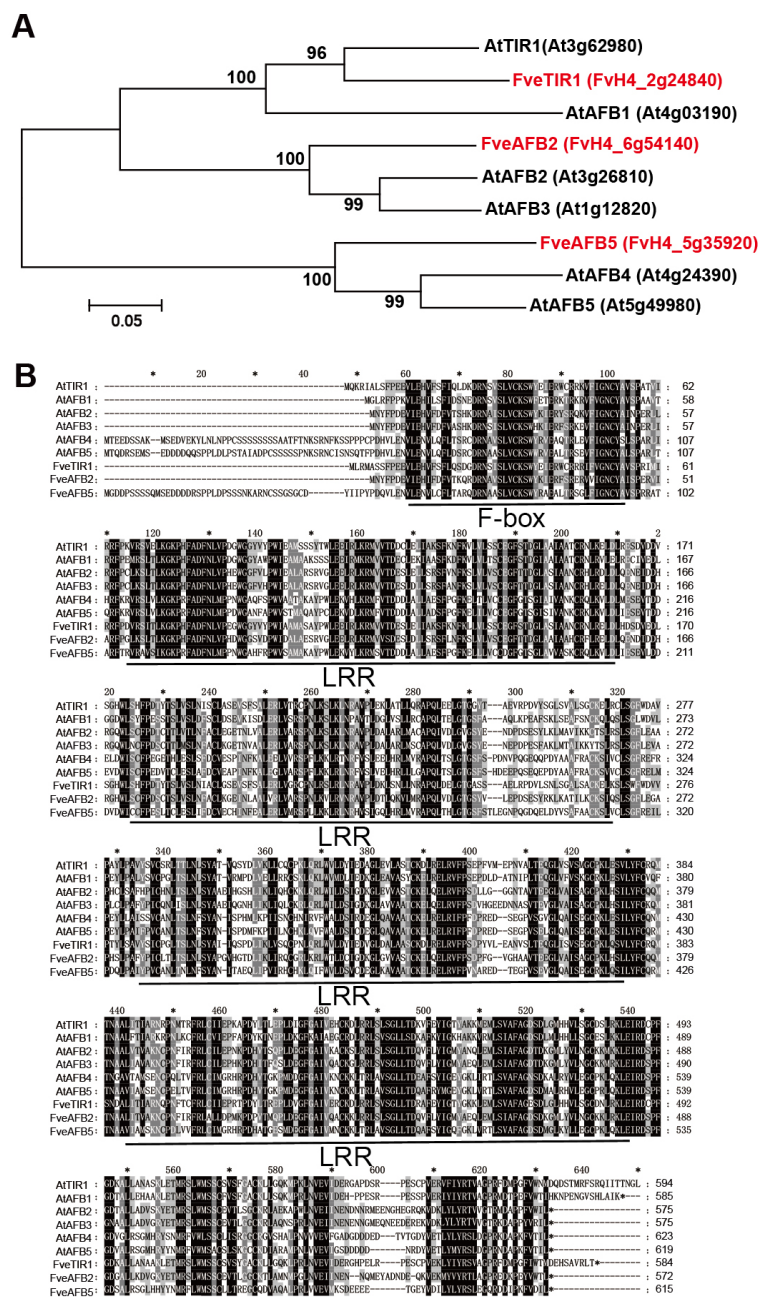



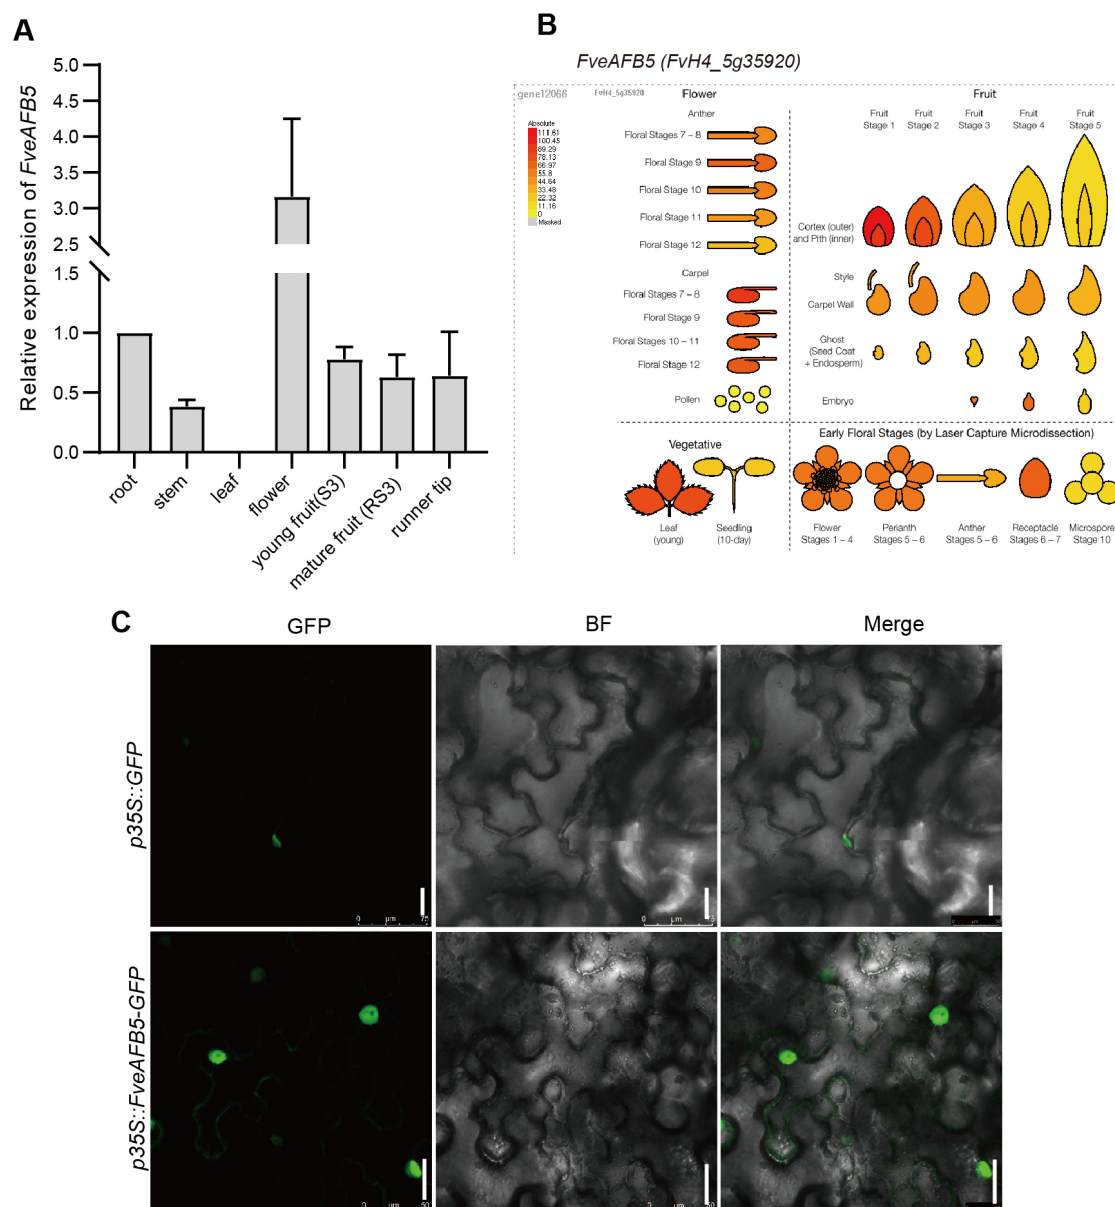

**Figure S2.** Expression pattern and subcellular localization of FveAFB5.

(A,B) Quantitative reverse-transcription polymerase chain reaction (qRT-PCR) analyses (A) and eFP gene expression heatmap ([https://bar.utoronto.ca/efp\\_strawberry/cgi-bin/efpWeb.cgi](https://bar.utoronto.ca/efp_strawberry/cgi-bin/efpWeb.cgi) (accessed on 10 March 2022)) (B) of *FveAFB5* in the different tissues of strawberries.

(C) Subcellular localization of FveAFB5-GFP fusion protein in *Nicotina benthamiana* leaf epidermis cells. *p35S::GFP* acts as negative control. Scale bar, 50  $\mu$ m.



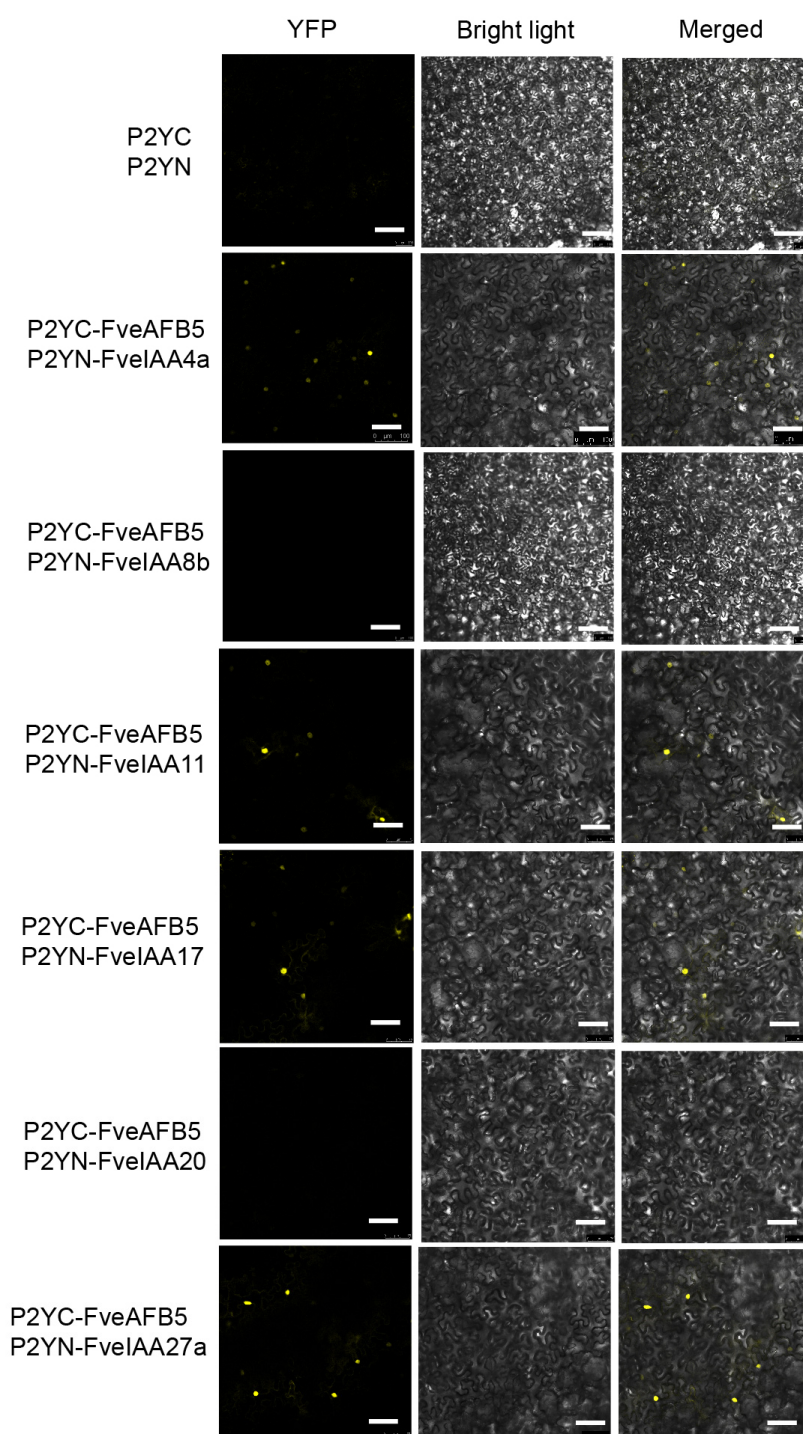

**Figure S3.** FveAFB5 interacts with FveIAA proteins in vivo.

The interaction between FveAFB5 and FveIAA proteins was determined by bimolecular fluorescence complementation (BiFC) imaging assays in *Nicotiana benthamiana* leaves. nYFP, N-terminal region of bimolecular fluorescence; cYFP, C-terminal region of bimolecular fluorescence. Scale bar, 100  $\mu$ m.



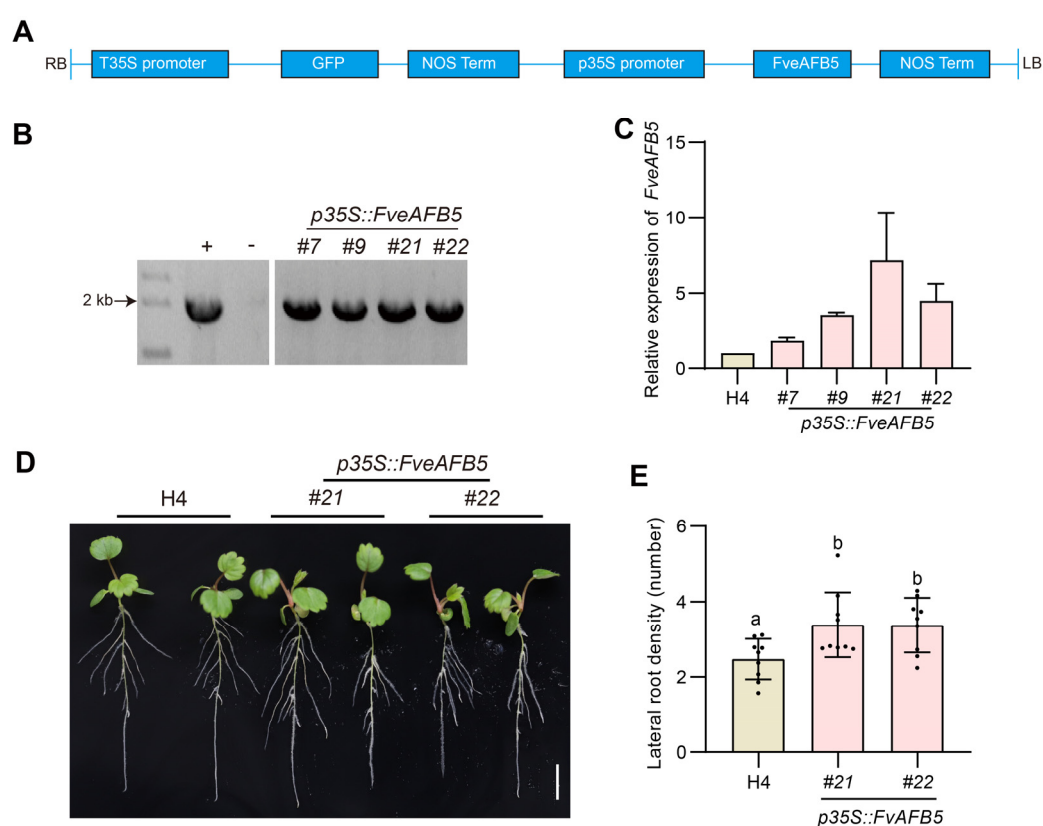

**Figure S4.** *FveAFB5* overexpression leads to more lateral root.

(A–C) Identification of *FveAFB5* overexpression transgenic plants. (A) Main components of *FveAFB5* overexpression vector pK7WG2D.1-*FveAFB5*. (B) PCR verification of *FveAFB5* overexpression transgenic plants, “+” represents the vector as a positive control, and “-” represents H4 as a negative control. (C) qRT-PCR identifies *FveAFB5* gene expression in the *FveAFB5* overexpression transgenic plants.

(D,E) Root phenotype (D) and quantification analysis of the lateral root density (E) in *FveAFB5* overexpression transgenic plants. One-way ANOVA, \* represent significant difference at  $P < 0.05$  ( $n = 9$ ). Scale bars, 1 cm. The experiments were repeated at least 3 times and showed similar, consistent results.



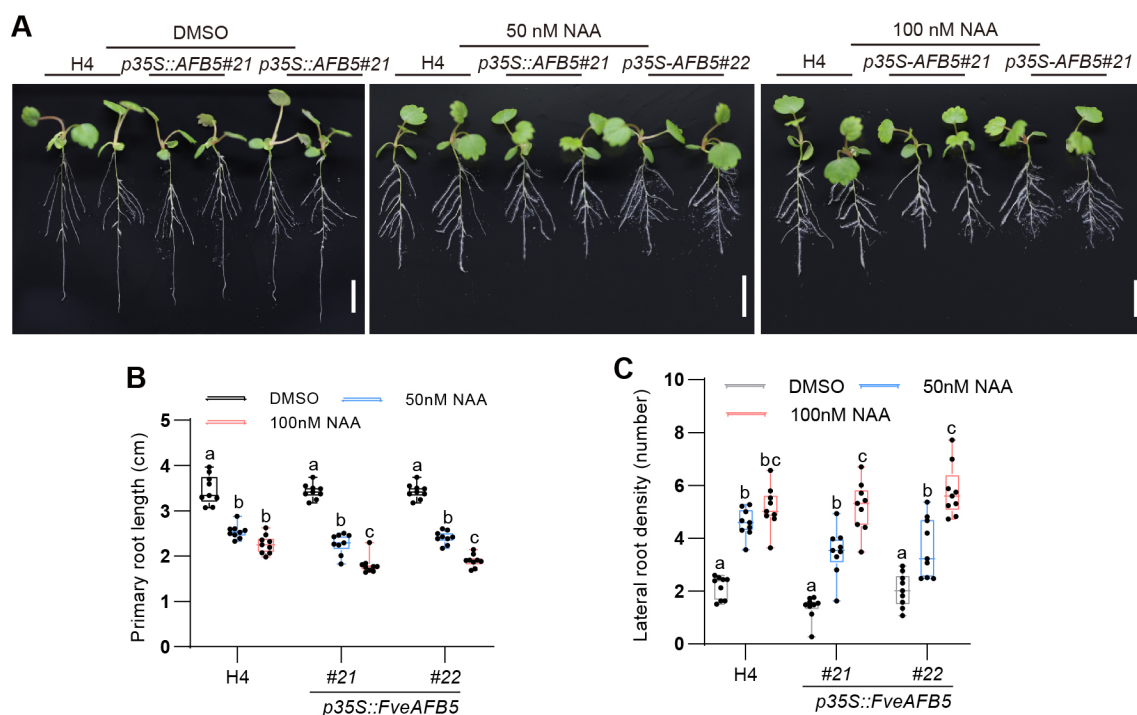

**Figure S5.** *FveAFB5* overexpression shows hypersensitive to auxin during primary root and lateral root development

(A) Root phenotype in H4 and *FveAFB5* overexpression lines under auxin treatment with different concentrations.

(B,C) Quantification analysis of the primary root length (B) and lateral root density (C). Scale bar, 1 cm. Two-way ANOVA, different letters represent significant difference at  $P < 0.01$  ( $n = 9$ ).



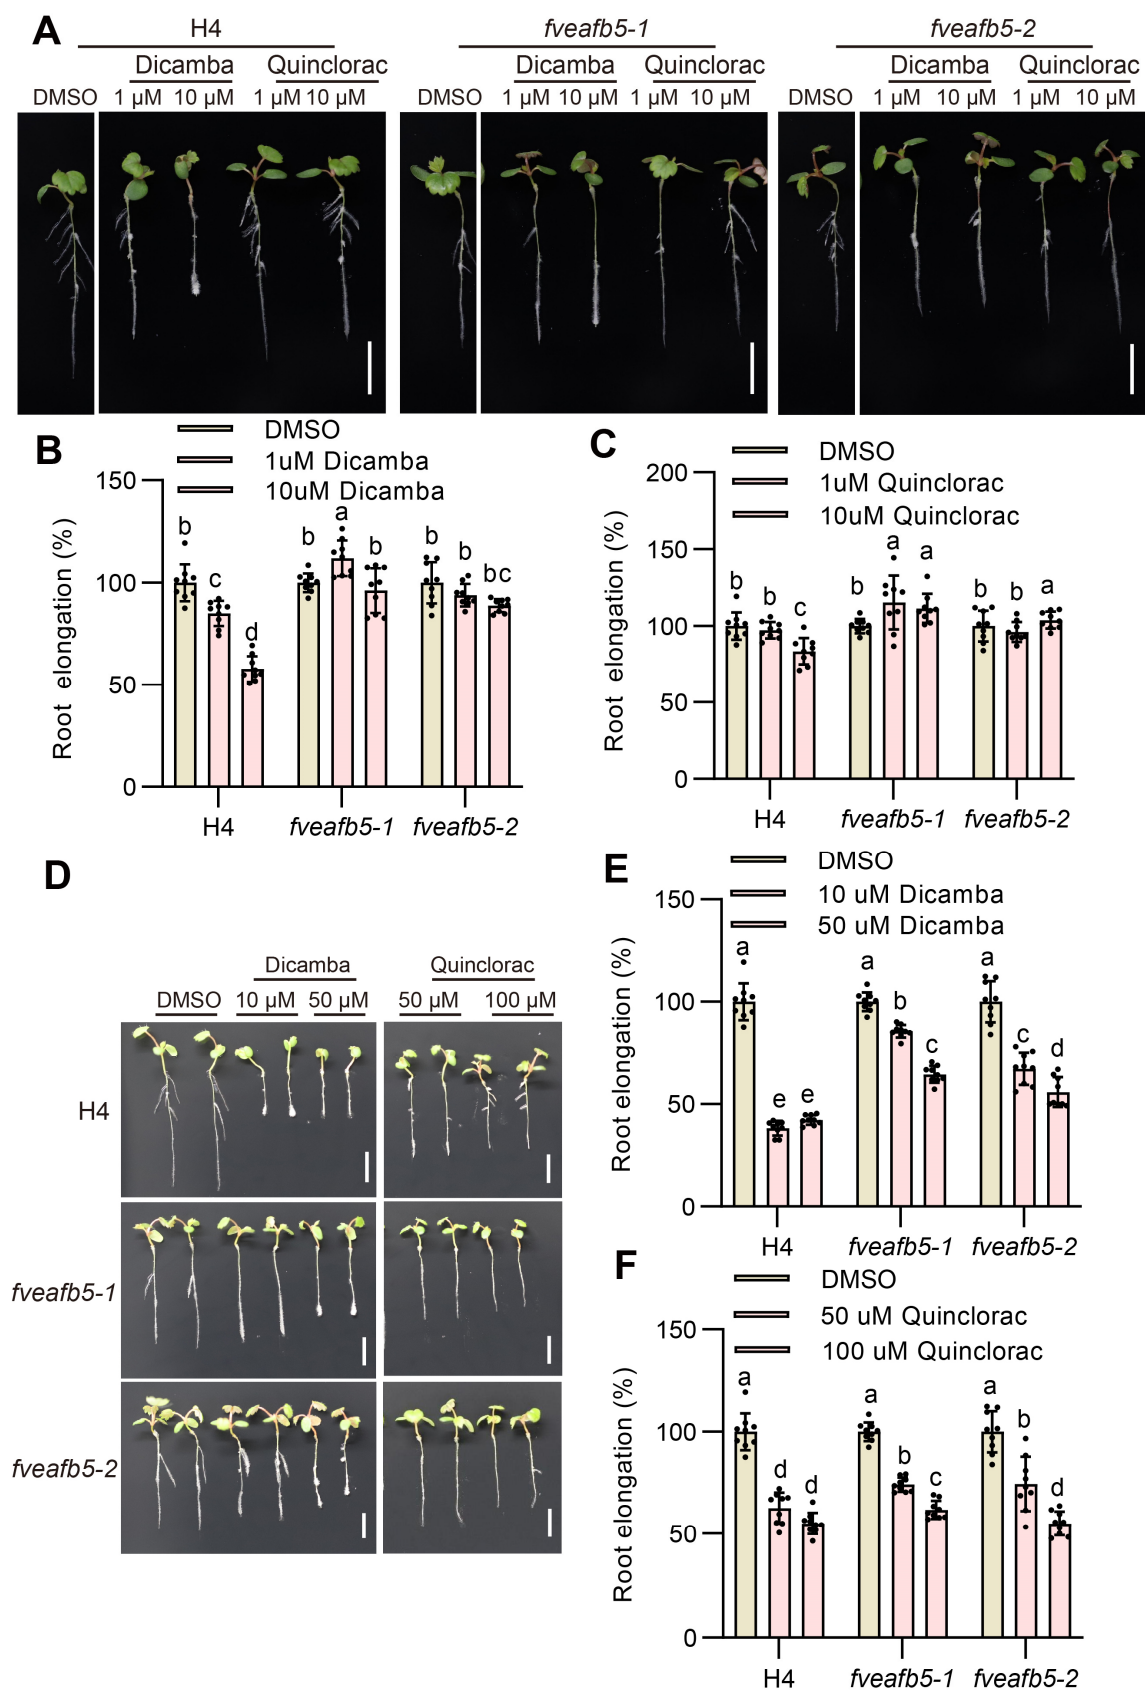

**Figure S6.** *FveAFB5* mutation shows resistance to auxinic herbicides dicamba and quinclorac.



(A–C) Resistance phenotype of *fveafb5* mutants to 1  $\mu$ M or 10  $\mu$ M auxinic herbicides dicamba and quinclorac. (A) H4 and *fveafb5* mutants treated with 1  $\mu$ M or 10  $\mu$ M dicamba and quinclorac concentrations for 5 days were observed. (B–C) Quantification analysis of the root elongation phenotype under dicamba (B) and quinclorac (C) treatment respectively.

(D–F) The resistance phenotype of *fveafb5* mutants treated with 10  $\mu$ M or 50  $\mu$ M auxinic herbicides dicamba and quinclorac. (D) H4 and *fveafb5* mutants treated with 10  $\mu$ M or 50  $\mu$ M dicamba and quinclorac concentrations for 5 days were observed. (E,F) Quantification analysis of the root elongation phenotype under dicamba (E) and quinclorac (F) treatment respectively. Scale bar, 1 cm and two-way ANOVA, different letters represent significant difference at  $P < 0.01$  ( $n = 9$ ). The experiments were repeated at least 3 times and showed similar, consistent results.



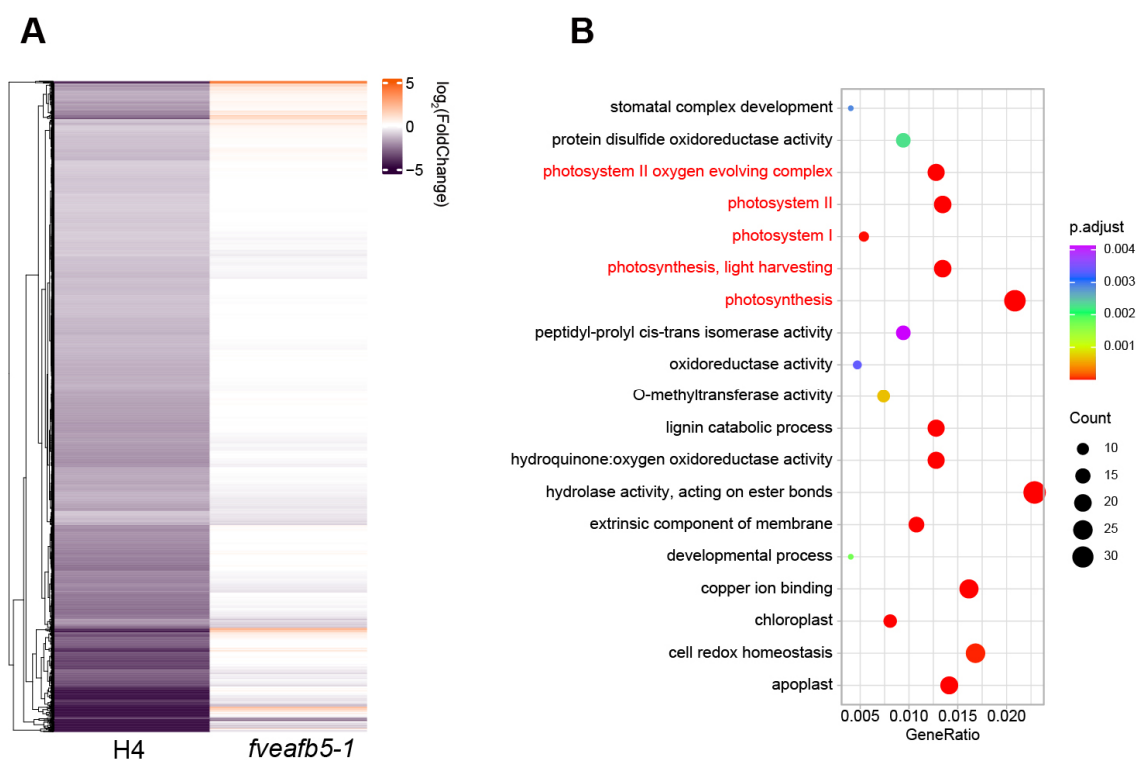

**Figure S7.** FveAFB5 mediates transcriptome reprogramming under auxinic herbicides picloram treatment

(A) Heatmap shows the different fold changes of the down-regulated DEGs in H4 and *fveafb5-1* mutant under picloram treatment. (B) Gene Ontology (GO) analysis shows the down-regulated DEGs in the H4 and *fveafb5-1* mutant under picloram treatment. GO analysis only shows the top 19 GO terms according to  $q$  value. The size of the pie chart area represents the number of enriched genes. Photosynthesis-related categories were marked by red characters.



## Supplementary Table Sets

### Supplementary Table S1. List of primers used in this study.

All primers used for genotyping, generation of the constructs and qRT-PCR are listed. The purposes of these primers are listed in the left. The name and sequence of these primers are displayed in the right. F, forward; R, reverse.

### Supplementary Table S2. List of up- and down-regulated genes at stage 2 fruit development stage in *fveafb5* compared with H4.

Data includes both up- and down-regulated genes at stage 2 fruit development stage in *fveafb5* compared with in H4. Differentially expressed genes (DEGs) ( $\text{padj} < 0.05$ ,  $\text{CPM} > 1$ ,  $\text{Log}_2\text{FC} > 1$  for up-regulated and  $\text{Log}_2\text{FC} < -1$  for down-regulated) were normalized and extracted.

### Supplementary Table S3. List of up- and down-regulated genes after 5-day picloram treatment in H4.

Data includes both up- and down-regulated genes after 5-day picloram treatment compared with blank treatment in H4. Differentially expressed genes (DEGs) ( $\text{padj} < 0.05$ ,  $\text{CPM} > 1$ ,  $\text{Log}_2\text{FC} > 1$  for up-regulated and  $\text{Log}_2\text{FC} < -1$  for down-regulated) were normalized and extracted.

### Supplementary Table S4. List of up- and down-regulated genes after 5-day picloram treatment in *fveafb5*.

Data includes both up- and down-regulated genes after 5-day picloram treatment compared with blank treatment in *fveafb5*. Differentially expressed genes (DEGs) ( $\text{padj} < 0.05$ ,  $\text{CPM} > 1$ ,  $\text{Log}_2\text{FC} > 1$  for up-regulated and  $\text{Log}_2\text{FC} < -1$  for down-regulated) were normalized and extracted.

### Supplementary Table S5. GO enrichment analysis of FveAFB5-activated up-regulation DEGs at stage 2 fruit development stage.

### Supplementary Table S6. GO enrichment analysis of FveAFB5-activated up-regulation DEGs after 5-day picloram treatment.

### Supplementary Table S7. GO enrichment analysis of FveAFB5-repressed down-regulation DEGs after 5-day picloram treatment.
