# Supplementary material for: The Role of FveAFB5 in Auxin-Mediated Responses and Growth in Strawberries
Source: Plants (Basel). 2024 Apr 19;13(8):1142. doi: 10.3390/plants13081142 (PMC11055006; doi:10.3390/plants13081142)
Supplement: Supplementary file 1 [file plants-13-01142-s001.zip › Supplementary Table Sets.xlsx]

## Sheet: Supplementary Table S1
Supplementary Table S1. List of primers used in this study.
Purpose	Primer Name	Sequence (5'-3')
genotyping	Hyg-F	CAAGCTCTGATAGAGTTGGTCAAGA
genotyping	Hyg-R	AGGAATCGGTCAATACACTACATGG
genotyping	FvAFB5-F0	AGGGCATGGAGAATCCCAAT
genotyping	FvAFB5-R0	GCTTGAAACTAAACTCACTG
pK7WG2D.1-FvAFB5-GFP	pDONR-FvAFB5-F	GGGGACAAGTTTGTACAAAAAAGCAGGCTTCATGGGAGACGACCCTTCTT
pK7WG2D.1-FvAFB5-GFP	pDONR-FvAFB5-R	GGGGACCACTTTGTACAAGAAAGCTGGGTCCAGGATATCAACAAACTTT
CRISPR/Cas9-FvAFB5	FvAFB5-sgRNA1-F	GATTG TCGTCGTCCCAAATGTCCG
CRISPR/Cas9-FvAFB5	FvAFB5-sgRNA1-R	AAAC CGGACATTTGGGACGACGAC
CRISPR/Cas9-FvAFB5	FvAFB5-sgRNA2-F	GATTG CGCTTCACCCGCGTCCGGG
CRISPR/Cas9-FvAFB5	FvAFB5-sgRNA2-R	AAAC CCCGGACGCGGGTGAAGCGC
pGWB505-FvAFB5-GFP	pDONR-FvAFB5-F	GGGGACAAGTTTGTACAAAAAAGCAGGCTTCATGGGAGACGACCCTTCTT
pGWB505-FvAFB5-GFP	pDONR-FvAFB5-R	GGGGACCACTTTGTACAAGAAAGCTGGGTCCAGGATATCAACAAACTTT
qRT-PCR	FvAFB5-F	GATTTTCTGGGTACTCGATTCAGT
qRT-PCR	FvAFB5-R	GACTGGGAAAACCCGAAGTT
qRT-PCR	FvACTIN-F	GCCAGAAAGATGCTTATGTCGGTG
qRT-PCR	FvACTIN-R	TGGGGCAACACGAAGCTCAT
qRT-PCR	FvTPX2a-F	AGCGTGTGCGCTTAGTTAGA
qRT-PCR	FvTPX2a-R	GGCCTATTTGTGATGGAGCCT
qRT-PCR	FvTPX2c-F	AAGTTCAAGGCTCGTCCAGT
qRT-PCR	FvTPX2c-R	GCACTCTTTGCATTCAAACACCA
qRT-PCR	FvSAUR50a-F	GCCCCTACTGCACCAGATAC
qRT-PCR	FvSAUR50a-R	AAAGGGCCTTGGTTGGTGAA
qRT-PCR	FvSAUR50c-F	ATATCGTGGTTGGGGCATCC
qRT-PCR	FvSAUR50c-R	CGCAAGGAATCGTCAAACCC
qRT-PCR	FvGH3.1-F	TGCCGAACATGGCCTACTTT
qRT-PCR	FvGH3.1-R	GCTCGTATTCCCTTCCGACC
qRT-PCR	FvIAA1-F	GAAAGCCCCAACTGCAAAGG
qRT-PCR	FvIAA1-R	GCTCCATCAGCTCCCACTTT
qRT-PCR	FvIAA6-F	AGAGGCTGCGGATCATGAAG
qRT-PCR	FvIAA6-R	GCTCGTCTTTCATCGTTGCC
qRT-PCR	FvIAA20b-F	GGCGGCTCAACATTTGTGAA
qRT-PCR	FvIAA20b-R	AGTGTGTGGAAACCCTGGTG
BiFC	P2YC-FvAFB5-F	ATTTACGAACGATAGTTAATTAACATGGGAGACGACCCTTCTT
BiFC	P2YC-FvAFB5-R	ACTGCCACCTCCTCCACTAGTCAGGATATCAACAAACTTT
BiFC	P2YN-FvIAA4a-F	ATTTACGAACGATAGTTAATTAACATGGAAAGCAAGGGCTATGA
BiFC	P2YN-FvIAA4a-R	ACTGCCACCTCCTCCACTAGT TACACCACAACCCAAGCCTC
BiFC	P2YN-FvIAA8b-F	ATTTACGAACGATAGTTAATTAACATGTCACAACCACAGGTCGG
BiFC	P2YN-FvIAA8b-R	ACTGCCACCTCCTCCACTAGT GTTCCTGTTCCTGCACTTCT
BiFC	P2YN-FvIAA11-F	ATTTACGAACGATAGTTAATTAACATGCCTTCAGCAACTGGGTC
BiFC	P2YN-FvIAA11-R	ACTGCCACCTCCTCCACTAGT GCTCGTGCATCTCTGCCTTG
BiFC	P2YN-FvIAA17-F	ATTTACGAACGATAGTTAATTAACATGTCACCGGAAAATGAGCA
BiFC	P2YN-FvIAA17-R	ACTGCCACCTCCTCCACTAGT GCTGCTGCTTGTGCATTTTG
BiFC	P2YN-FvIAA20-F	ATTTACGAACGATAGTTAATTAACATGGAGCTTCAACTGGGTTT
BiFC	P2YN-FvIAA20-R	ACTGCCACCTCCTCCACTAGT ACCACCATTCCTTATAATCT
BiFC	P2YN-FvIAA27a-F	ATTTACGAACGATAGTTAATTAAC ATGTCTATGTCCTTGGAGCA
BiFC	P2YN-FvIAA27a-R	ACTGCCACCTCCTCCACTAGT ATTACTATTTTTGCACTTCT

## Sheet: Supplementary Table S2
Supplementary Table S2. List of up- and down-regulated genes in stage2 of fruit development in fvafb5 vs H4.
Geneid	baseMean	log2FoldChange	lfcSE	stat	pvalue	padj	Match(Nr)	Description(Nr)	Match	Description(Ab)	Match(Ab)	Description（trembl）	H4_S2_1.nor	H4_S2_2.nor	H4_S2_3.nor	L83_S2_1.nor	L83_S2_2.nor	L83_S2_3.nor
FvH4_2g05520	37.683	-9.22595	1.82377	-5.05873	4.22e-07	0.000190036	-	-	-	-	-	-	172.464	134.774	0	0	0	0
FvH4_7g06405	21.9619	-8.46306	1.8785	-4.50521	6.63e-06	0.00166927	-	-	SYIC_ARATH	Isoleucine--tRNA ligase, cytoplasmic OS=Arabidopsis thaliana OX=3702 GN=At4g10320 PE=2 SV=1	AT4G10320.1	-	94.1616	95.6169	162.654	0	0	0.933369
FvH4_4g27840	142.128	-7.89528	1.06389	-7.42114	1.16e-13	1.43e-10	-	-	-	-	-	-	59.4705	464.425	362.206	0	0	3.73348
FvH4_7g16570	133.662	-7.45186	0.995269	-7.48728	7.03e-14	1.18e-10	gi|1365933732|ref|XP_024176795.1|	uncharacterized protein LOC112182524 [Rosa chinensis]	-	-	-	-	397.461	382.468	343.38	0	3.54088	2.80011
FvH4_2g16130	39.6221	-7.34017	1.61338	-4.54955	5.38e-06	0.00143032	-	-	-	-	-	Uncharacterized protein OS=Prunus persica OX=3760 GN=PRUPE_ppa019388mg PE=4 SV=1	43.6117	1.82128	37.6513	0	0	0
FvH4_1g03760	457.567	-6.71011	1.18476	-5.66367	1.48e-08	8.46e-06	gi|470101802|ref|XP_004287357.1|	PREDICTED: early nodulin-93-like [Fragaria vesca subsp. vesca]	-	-	-	Putative early nodulin 93 ENOD93 protein OS=Rosa chinensis OX=74649 GN=RchiOBHm_Chr2g0089171 PE=4 SV=1	53.5235	1398.74	856.192	0	7.08177	14.9339
FvH4_7g16580	43.4094	-6.41512	1.38255	-4.64008	3.48e-06	0.000970726	gi|764554705|ref|XP_011460531.1|	PREDICTED: (S)-scoulerine 9-O-methyltransferase-like isoform X1 [Fragaria vesca subsp. vesca]	-	-	-	-	15.8588	23.6766	4.51816	0	0	0
FvH4_1g01700	10.6908	-6.25422	1.62676	-3.84458	0.000120761	0.0133366	-	-	-	-	-	Uncharacterized protein OS=Rosa chinensis OX=74649 GN=RchiOBHm_Chr2g0086591 PE=4 SV=1	7.9294	14.5702	16.5666	0	0	0
FvH4_5g27997	6.84827	-6.24085	1.80012	-3.4669	0.000526504	0.0370181	-	-	-	-	AT1G17070.1	-	13.8765	7.2851	54.2179	0	0	0.933369
FvH4_1g04421	19.7558	-5.88446	1.64075	-3.58644	0.000335221	0.0291731	-	-	-	-	-	Putative transcription factor interactor and regulator CCHC(Zn) family OS=Rosa chinensis OX=74649 GN=RchiOBHm_Chr2g0090381 PE=4 SV=1	19.8235	0	10.5424	0	0	0
FvH4_4g30370	911.426	-5.7945	1.29443	-4.47648	7.59e-06	0.00181293	gi|764574937|ref|XP_011463031.1|	PREDICTED: alpha-1,4 glucan phosphorylase L-2 isozyme, chloroplastic/amyloplastic-like [Fragaria vesca subsp. vesca]	PHSL2_SOLTU	Alpha-1,4 glucan phosphorylase L-2 isozyme, chloroplastic/amyloplastic OS=Solanum tuberosum OX=4113 GN=STP-1 PE=1 SV=1	AT3G29320.1	-	1.98235	23.6766	3.01211	0	0	0
FvH4_5g27996	14.7307	-5.78113	1.5806	-3.65754	0.000254645	0.0235652	-	-	-	-	-	-	27.7529	12.7489	61.7482	0	0	1.86674
FvH4_3g27050	706.439	-5.71924	0.752835	-7.59693	3.03e-14	6.45e-11	-	-	-	-	-	-	1407.47	1720.19	2030.91	27.1998	38.9497	31.7345
FvH4_5g16530	141.081	-5.71322	1.26604	-4.51268	6.4e-06	0.00162911	-	-	-	-	-	-	9.91175	14.5702	3.01211	0	0	0
FvH4_4g25043	71.1799	-5.63921	1.39973	-4.02877	5.61e-05	0.00763217	-	-	KCR1_ARATH	Very-long-chain 3-oxoacyl-CoA reductase 1 OS=Arabidopsis thaliana OX=3702 GN=KCR1 PE=1 SV=1	AT1G67730.1	-	3.9647	21.8553	0	0	0	0
FvH4_4g21811	26.0176	-5.62636	1.43243	-3.92783	8.57e-05	0.0105072	gi|764573427|ref|XP_004298249.2|	PREDICTED: protein NRT1/ PTR FAMILY 4.5-like [Fragaria vesca subsp. vesca]	PTR19_ARATH	Protein NRT1/ PTR FAMILY 4.6 OS=Arabidopsis thaliana OX=3702 GN=NPF4.6 PE=1 SV=1	AT1G69850.1	Putative proton-dependent oligopeptide transporter family, major facilitator superfamily OS=Rosa chinensis OX=74649 GN=RchiOBHm_Chr4g0428051 PE=4 SV=1	3.9647	20.034	1.50605	0	0	0
FvH4_1g07181	209.17	-5.59092	0.752812	-7.42672	1.11e-13	1.43e-10	-	-	ACCO1_ARATH	1-aminocyclopropane-1-carboxylate oxidase 1 OS=Arabidopsis thaliana OX=3702 GN=ACO1 PE=2 SV=1	-	Putative aminocyclopropanecarboxylate oxidase OS=Rosa chinensis OX=74649 GN=RchiOBHm_Chr2g0093091 PE=3 SV=1	56.497	581.897	301.964	7.77139	7.08177	4.66684
FvH4_3g45090	70.8976	-5.58978	1.65477	-3.37797	0.000730229	0.0452298	-	-	ZIP4_ARATH	Zinc transporter 4, chloroplastic OS=Arabidopsis thaliana OX=3702 GN=ZIP4 PE=2 SV=1	AT1G60960.2	Zinc/iron permease OS=Corchorus capsularis OX=210143 GN=CCACVL1_20908 PE=3 SV=1	9.91175	7.2851	7.53027	0	0	0
FvH4_5g28441	19.319	-5.44182	1.00848	-5.39609	6.81e-08	3.62e-05	gi|764604319|ref|XP_011466876.1|	PREDICTED: uncharacterized protein LOC105349343 [Fragaria vesca subsp. vesca]	-	-	-	-	46.5852	52.817	100.906	0	1.77044	2.80011
FvH4_6g22750	253.639	-5.41666	1.60944	-3.36555	0.000763924	0.0466991	-	-	-	-	-	-	1.98235	20.034	0	0	0	0
FvH4_1g03420	1992.87	-5.39351	1.25927	-4.28306	1.84e-05	0.00324511	gi|470101761|ref|XP_004287337.1|	PREDICTED: fasciclin-like arabinogalactan protein 13 [Fragaria vesca subsp. vesca]	FLA6_ARATH	Fasciclin-like arabinogalactan protein 6 OS=Arabidopsis thaliana OX=3702 GN=FLA6 PE=2 SV=2	AT2G20520.1	Putative FAS1 domain-containing protein OS=Rosa chinensis OX=74649 GN=RchiOBHm_Chr2g0088651 PE=4 SV=1	5.94705	16.3915	0	0	0	0
FvH4_7g32800	346.04	-5.34199	1.26442	-4.22487	2.39e-05	0.00399853	-	-	HS22C_PETHY	Small heat shock protein, chloroplastic OS=Petunia hybrida OX=4102 GN=HSP22 PE=2 SV=1	AT4G27670.1	-	7.9294	3.64255	9.03632	0	0	0
FvH4_7g05970	41.5341	-5.30511	1.47492	-3.59689	0.000322043	0.0284528	-	-	PTL_ARATH	Trihelix transcription factor PTL OS=Arabidopsis thaliana OX=3702 GN=PTL PE=1 SV=1	AT5G03680.1	-	5.94705	14.5702	0	0	0	0
FvH4_6g15810	592.995	-5.26979	1.32047	-3.99086	6.58e-05	0.00861107	-	-	-	-	-	-	3.9647	0	15.0605	0	0	0
FvH4_5g01600	172.692	-5.07219	1.43639	-3.5312	0.000413676	0.0335292	-	-	C87A3_ORYSJ	Cytochrome P450 87A3 OS=Oryza sativa subsp. japonica OX=39947 GN=CYP87A3 PE=2 SV=3	AT1G12740.1	-	0	0	16.5666	0	0	0
FvH4_6g32760	257.097	-4.98383	1.33677	-3.72826	0.000192803	0.0192089	-	-	-	-	-	-	1.98235	14.5702	0	0	0	0
FvH4_2g34280	64.3574	-4.92355	1.38752	-3.54845	0.000387506	0.0324267	-	-	-	-	-	Putative transcription factor bHLH family OS=Rosa chinensis OX=74649 GN=RchiOBHm_Chr6g0308101 PE=4 SV=1	0	10.9277	4.51816	0	0	0
FvH4_7g06220	213.495	-4.92301	1.41567	-3.47752	0.000506067	0.0361236	-	-	-	-	-	-	361.779	468.978	401.363	0	26.5566	14.0005
FvH4_5g04021	167.741	-4.92228	1.32079	-3.72677	0.000193946	0.0192409	-	-	-	-	-	-	8.92058	7.2851	0	0	0	0
FvH4_4g25200	420.302	-4.91975	1.27821	-3.84894	0.000118632	0.0132264	-	-	-	-	-	-	0	9.10638	6.02422	0	0	0
FvH4_7g06230	645.711	-4.86977	0.982373	-4.95714	7.15e-07	0.000274572	-	-	-	-	-	-	1044.7	1544.44	1445.06	50.514	56.6541	30.8012
FvH4_7g11780	133.434	-4.60756	1.31829	-3.4951	0.000473887	0.0356756	-	-	-	-	-	-	9.91175	0	3.01211	0	0	0
FvH4_5g39690	1023.37	-4.59527	1.126	-4.08106	4.48e-05	0.00650283	-	-	-	-	-	-	1.98235	14.5702	27.109	0	1.77044	0
FvH4_4g25680	347.63	-4.57806	1.27711	-3.58469	0.000337478	0.0291731	gi|1139797727|gb|ONI30345.1|	hypothetical protein PRUPE_1G245900 [Prunus persica]	-	-	-	-	1.98235	7.2851	3.01211	0	0	0
FvH4_5g27994	27.9091	-4.52153	1.04461	-4.32845	1.5e-05	0.00292165	-	-	RNHX1_ARATH	Putative ribonuclease H protein At1g65750 OS=Arabidopsis thaliana OX=3702 GN=At1g65750 PE=3 SV=1	AT3G24255.5	-	67.3999	41.8893	103.165	0	1.77044	7.46695
FvH4_5g28440	178.312	-4.45865	0.537299	-8.29827	1.06e-16	3.53e-13	gi|764604840|ref|XP_011466920.1|	PREDICTED: protein TPX2 isoform X2 [Fragaria vesca subsp. vesca]	TPX2_ARATH	Protein TPX2 OS=Arabidopsis thaliana OX=3702 GN=TPX2 PE=1 SV=1	AT1G03780.1	-	539.199	636.536	771.1	25.257	19.4749	43.8683
FvH4_2g10161	61.1127	-4.32553	1.15456	-3.74649	0.000179327	0.0182547	-	-	CRR38_ARATH	Cysteine-rich repeat secretory protein 38 OS=Arabidopsis thaliana OX=3702 GN=CRRSP38 PE=2 SV=1	AT3G22060.1	Putative Gnk2-like domain-containing protein OS=Rosa chinensis OX=74649 GN=RchiOBHm_Chr2g0160251 PE=4 SV=1	13.8765	14.5702	9.03632	0	0	1.86674
FvH4_5g28471	153.545	-4.2963	0.576472	-7.45274	9.14e-14	1.36e-10	gi|764604840|ref|XP_011466920.1|	PREDICTED: protein TPX2 isoform X2 [Fragaria vesca subsp. vesca]	TPX2_ARATH	Protein TPX2 OS=Arabidopsis thaliana OX=3702 GN=TPX2 PE=1 SV=1	AT1G03780.2	-	346.911	398.859	248.499	21.3713	9.73743	19.6007
FvH4_2g12080	45.3093	-4.08789	1.06865	-3.82529	0.000130618	0.0140929	-	-	-	-	-	-	75.3293	189.413	326.061	0	14.1635	20.5341
FvH4_7g00350	14.6277	-4.07992	1.18206	-3.45154	0.000557395	0.0381675	gi|470134461|ref|XP_004303070.1|	PREDICTED: probable 39S ribosomal protein L33, mitochondrial [Fragaria vesca subsp. vesca]	-	-	-	-	5.94705	23.6766	33.1332	0	0	3.73348
FvH4_2g11751	161.617	-3.91456	0.767031	-5.10353	3.33e-07	0.000155473	-	-	ACLA2_ARATH	ATP-citrate synthase alpha chain protein 2 OS=Arabidopsis thaliana OX=3702 GN=ACLA-2 PE=2 SV=1	AT1G60810.2	Uncharacterized protein OS=Eutrema salsugineum OX=72664 GN=EUTSA_v10023479mg PE=4 SV=1	436.117	421.625	843.39	13.5999	84.096	14.9339
FvH4_6g06540	775.531	-3.77964	0.549203	-6.88205	5.9e-12	6.28e-09	-	-	PINS_FRAVE	(-)-alpha-pinene synthase OS=Fragaria vesca OX=57918 PE=1 SV=2	AT5G23960.2	-	35.6823	81.9574	176.208	7.77139	3.54088	10.2671
FvH4_2g11750	52.6697	-3.77357	0.979615	-3.85209	0.000117112	0.0131824	-	-	-	-	-	-	112.003	204.893	250.758	0	28.3271	13.0672
FvH4_5g27995	18.5655	-3.65092	1.07401	-3.39933	0.000675508	0.0427451	-	-	RNHX1_ARATH	Putative ribonuclease H protein At1g65750 OS=Arabidopsis thaliana OX=3702 GN=At1g65750 PE=3 SV=1	AT5G42905.1	-	27.7529	42.8	66.2664	0	7.08177	3.73348
FvH4_7g06404	70.7561	-3.61403	0.76291	-4.73716	2.17e-06	0.000650569	-	-	-	-	-	-	151.65	214	351.664	33.0284	7.96699	17.734
FvH4_3g27051	272.307	-3.4682	0.337155	-10.2867	8.09e-25	6.32e-21	-	-	-	-	-	-	450.985	642.91	637.814	62.1711	47.8019	46.6684
FvH4_1g27140	25.8212	-3.18111	0.809549	-3.92949	8.51e-05	0.0104899	-	-	SYIC_ARATH	Isoleucine--tRNA ligase, cytoplasmic OS=Arabidopsis thaliana OX=3702 GN=At4g10320 PE=2 SV=1	AT4G10320.1	Uncharacterized protein OS=Leersia perrieri OX=77586 PE=4 SV=1	90.1969	54.6383	67.0194	8.74281	5.31132	9.33369
FvH4_5g28530	273.723	-3.16003	0.462752	-6.82877	8.56e-12	8.72e-09	gi|947081544|gb|KRH30333.1|	hypothetical protein GLYMA_11G176700 [Glycine max]	AUR2_ARATH	Serine/threonine-protein kinase Aurora-2 OS=Arabidopsis thaliana OX=3702 GN=AUR2 PE=2 SV=2	AT2G25880.1	-	836.552	866.927	997.761	148.628	72.5881	81.2031
FvH4_4g12160	61.6949	-3.1528	0.537209	-5.86886	4.39e-09	2.94e-06	gi|1365998606|ref|XP_024197762.1|	uncharacterized protein LOC112200988 isoform X2 [Rosa chinensis]	-	-	-	Putative histidine kinase-like ATPase domain-containing protein OS=Rosa chinensis OX=74649 GN=RchiOBHm_Chr4g0412151 PE=4 SV=1	180.394	183.949	176.208	17.4856	30.0975	13.0672
FvH4_5g28300	230.025	-3.1521	0.420914	-7.48872	6.96e-14	1.18e-10	-	-	-	-	-	-	118.941	331.472	356.182	29.1427	33.6384	28.0011
FvH4_7g24580	80.3634	-3.12561	0.803511	-3.88995	0.000100266	0.0116214	-	-	-	-	-	-	9.91175	21.8553	16.5666	0	1.77044	3.73348
FvH4_1g19623	47.6991	-3.11507	0.776563	-4.01135	6.04e-05	0.00812342	-	-	-	-	-	Uncharacterized protein OS=Rosa chinensis OX=74649 GN=RchiOBHm_Chr2g0111181 PE=4 SV=1	17.8412	23.6766	22.5908	0	1.77044	5.60021
FvH4_2g12100	525.81	-2.98075	0.566076	-5.26563	1.4e-07	7.27e-05	gi|764621973|ref|XP_011468733.1|	PREDICTED: uncharacterized protein LOC101310447 isoform X1 [Fragaria vesca subsp. vesca]	-	-	AT5G61450.1	Putative P-loop containing nucleoside triphosphate hydrolase OS=Rosa chinensis OX=74649 GN=RchiOBHm_Chr1g0331961 PE=4 SV=1	894.04	784.97	1378.04	67.9996	190.322	128.805
FvH4_5g28310	884.932	-2.88148	0.387147	-7.44286	9.85e-14	1.36e-10	-	-	-	-	-	-	963.422	1397.83	1320.81	304.055	83.2107	112.938
FvH4_1g11390	2815.05	-2.87854	0.751909	-3.82831	0.000129028	0.0139858	-	-	-	-	-	Putative triacylglycerol lipase OS=Rosa chinensis OX=74649 GN=RchiOBHm_Chr2g0098921 PE=3 SV=1	17.8412	14.5702	9.03632	0	0	5.60021
FvH4_2g11630	261.162	-2.82778	0.551171	-5.13049	2.89e-07	0.000138082	gi|764531564|ref|XP_011458398.1|	PREDICTED: uncharacterized protein LOC105349701 [Fragaria vesca subsp. vesca]	-	-	-	Uncharacterized protein OS=Rosa chinensis OX=74649 GN=RchiOBHm_Chr6g0270871 PE=4 SV=1	31.7176	72.851	39.1574	0	8.85221	11.2004
FvH4_5g28560	182.361	-2.78396	0.626529	-4.44347	8.85e-06	0.00203188	-	-	-	-	-	-	367.726	647.463	618.235	134.056	39.8349	63.4691
FvH4_2g12940	112.365	-2.76557	0.771526	-3.58454	0.000337672	0.0291731	gi|1358150103|gb|PRQ24582.1|	putative very-long-chain 3-oxoacyl-CoA synthase [Rosa chinensis]	KCS1_ARATH	3-ketoacyl-CoA synthase 1 OS=Arabidopsis thaliana OX=3702 GN=KCS1 PE=1 SV=1	AT1G01120.1	3-ketoacyl-CoA synthase OS=Rosa chinensis OX=74649 GN=RchiOBHm_Chr6g0274011 PE=3 SV=1	15.8588	16.3915	18.0726	0	1.77044	5.60021
FvH4_6g46510	449.657	-2.75809	0.635506	-4.33999	1.42e-05	0.00285136	gi|470136886|ref|XP_004304212.1|	PREDICTED: alpha-1,4-glucan-protein synthase [UDP-forming]	RGP2_SOLTU	Probable UDP-arabinopyranose mutase 2 OS=Solanum tuberosum OX=4113 GN=UPTG2 PE=1 SV=1	AT5G15650.1	-	13.8765	47.3532	13.5545	0	7.08177	3.73348
FvH4_5g26311	249.405	-2.6819	0.789748	-3.3959	0.000684042	0.0430524	gi|764589490|ref|XP_011465005.1|	PREDICTED: uncharacterized transporter YBR287W-like isoform X1 [Fragaria vesca subsp. vesca]	-	-	-	-	3.9647	21.8553	21.0848	0	3.54088	3.73348
FvH4_2g15050	226.314	-2.67609	0.655305	-4.08373	4.43e-05	0.0064852	gi|470108545|ref|XP_004290576.1|	PREDICTED: basic blue protein [Fragaria vesca subsp. vesca]	BABL_ARATH	Basic blue protein OS=Arabidopsis thaliana OX=3702 GN=ARPN PE=2 SV=2	AT2G02850.1	Basic blue protein OS=Quercus suber OX=58331 GN=CFP56_15457 PE=4 SV=1	168.5	349.685	332.838	19.4285	37.1793	76.5362
FvH4_3g00800	3259.81	-2.66131	0.127566	-20.8622	1.18e-96	2.76e-92	gi|764550402|ref|XP_011460041.1|	PREDICTED: probable LRR receptor-like serine/threonine-protein kinase At1g07650 isoform X1 [Fragaria vesca subsp. vesca]	Y1765_ARATH	Probable LRR receptor-like serine/threonine-protein kinase At1g07650 OS=Arabidopsis thaliana OX=3702 GN=At1g07650 PE=1 SV=1	AT1G07650.4	Uncharacterized protein OS=Rosa chinensis OX=74649 GN=RchiOBHm_Chr5g0001061 PE=4 SV=1	1708.79	1797.6	1975.94	318.627	276.189	272.544
FvH4_4g24790	115.22	-2.49606	0.688972	-3.62287	0.000291349	0.0261354	-	-	-	-	-	Putative vinorine synthase OS=Rosa chinensis OX=74649 GN=RchiOBHm_Chr4g0431871 PE=4 SV=1	83.2587	120.204	30.1211	27.1998	12.3931	1.86674
FvH4_2g02190	224.238	-2.34909	0.411269	-5.71182	1.12e-08	6.89e-06	-	-	-	-	-	Putative major intrinsic protein OS=Rosa chinensis OX=74649 GN=RchiOBHm_Chr6g0245861 PE=3 SV=1	142.729	154.808	143.075	7.77139	33.6384	44.8017
FvH4_3g12400	207.585	-2.3242	0.388817	-5.97762	2.26e-09	1.66e-06	-	-	AATPI_ARATH	AAA-ATPase At5g17760 OS=Arabidopsis thaliana OX=3702 GN=At5g17760 PE=3 SV=1	-	Putative ATPase, AAA-type, core, AAA-type ATPase domain-containing protein OS=Rosa chinensis OX=74649 GN=RchiOBHm_Chr5g0020271 PE=4 SV=1	184.359	127.489	146.087	40.7998	28.3271	22.4009
FvH4_7g06403	110.796	-2.27467	0.549492	-4.13958	3.48e-05	0.00528976	gi|764626261|ref|XP_011469123.1|	PREDICTED: RNA-binding protein 28-like isoform X2 [Fragaria vesca subsp. vesca]	RBM28_MOUSE	RNA-binding protein 28 OS=Mus musculus OX=10090 GN=Rbm28 PE=1 SV=4	AT2G21440.1	-	314.203	170.289	335.097	80.6281	29.2123	59.7356
FvH4_3g27800	56.9344	-2.25115	0.64492	-3.49059	0.000481963	0.0356801	gi|470113868|ref|XP_004293141.1|	PREDICTED: calcium-dependent protein kinase 34 [Fragaria vesca subsp. vesca]	CDPKH_ARATH	Calcium-dependent protein kinase 17 OS=Arabidopsis thaliana OX=3702 GN=CPK17 PE=2 SV=1	AT5G12180.1	Uncharacterized protein OS=Rosa chinensis OX=74649 GN=RchiOBHm_Chr5g0050441 PE=4 SV=1	63.4352	272.281	258.288	17.4856	53.1132	54.1354
FvH4_3g36952	45.4319	-2.21873	0.634976	-3.4942	0.000475479	0.0356779	-	-	-	-	-	-	43.6117	52.817	52.7119	21.3713	6.19655	4.66684
FvH4_5g28461	116.226	-2.18773	0.457907	-4.77766	1.77e-06	0.00056879	gi|1366010641|ref|XP_024158339.1|	60S ribosomal protein L10 [Rosa chinensis]	RL10_EUPES	60S ribosomal protein L10 OS=Euphorbia esula OX=3993 GN=RPL10 PE=2 SV=1	AT1G26910.1	-	150.659	207.625	201.058	25.257	24.7862	72.8028
FvH4_1g14940	107.858	-2.18369	0.455172	-4.7975	1.61e-06	0.000533131	-	-	MES1_ARATH	Methylesterase 1 OS=Arabidopsis thaliana OX=3702 GN=MES1 PE=1 SV=1	AT2G23620.1	Putative 3-oxolaurate decarboxylase OS=Rosa chinensis OX=74649 GN=RchiOBHm_Chr2g0103951 PE=4 SV=1	27.7529	38.2468	76.8087	13.5999	8.85221	9.33369
FvH4_6g04231	3979.49	-2.17742	0.280463	-7.76366	8.25e-15	2.15e-11	gi|470103627|ref|XP_004288233.1|	PREDICTED: superoxide dismutase [Cu-Zn]	-	-	-	-	5685.38	8164.78	7220.02	2325.59	1104.76	1228.31
FvH4_5g28561	184.64	-1.97594	0.314507	-6.28267	3.33e-10	2.69e-07	gi|764604840|ref|XP_011466920.1|	PREDICTED: protein TPX2 isoform X2 [Fragaria vesca subsp. vesca]	TPX2_ARATH	Protein TPX2 OS=Arabidopsis thaliana OX=3702 GN=TPX2 PE=1 SV=1	AT1G03780.2	-	227.97	335.115	311.753	73.8282	82.3255	66.2692
FvH4_5g28460	661.92	-1.88905	0.262982	-7.18321	6.81e-13	7.97e-10	gi|764593610|ref|XP_011465492.1|	PREDICTED: uncharacterized protein LOC101296113 isoform X1 [Fragaria vesca subsp. vesca]	-	-	-	-	1233.02	1477.05	1783.17	277.827	375.334	560.021
FvH4_6g07300	604.239	-1.70509	0.363287	-4.69349	2.69e-06	0.000776328	gi|470132766|ref|XP_004302246.1|	PREDICTED: universal stress protein A-like protein isoform X1 [Fragaria vesca subsp. vesca]	USPAL_ARATH	Universal stress protein A-like protein OS=Arabidopsis thaliana OX=3702 GN=At3g01520 PE=1 SV=2	AT3G62550.1	-	1443.15	1683.77	1145.35	280.741	624.966	404.149
FvH4_3g17581	316.376	-1.65779	0.232422	-7.13266	9.84e-13	1.1e-09	gi|470119140|ref|XP_004295674.1|	PREDICTED: putative F-box/FBD/LRR-repeat protein At4g13965 [Fragaria vesca subsp. vesca]	FBL59_ARATH	F-box/LRR-repeat protein At3g58930 OS=Arabidopsis thaliana OX=3702 GN=At3g58930 PE=2 SV=1	AT3G58930.5	Putative F-box domain, FBD domain, leucine-rich repeat domain, L domain-containing protein OS=Rosa chinensis OX=74649 GN=RchiOBHm_Chr5g0029291 PE=4 SV=1	852.411	681.157	942.79	312.798	217.764	254.81
FvH4_5g30170	1051.65	-1.6368	0.380004	-4.30731	1.65e-05	0.00307062	-	-	BABL_ARATH	Basic blue protein OS=Arabidopsis thaliana OX=3702 GN=ARPN PE=2 SV=2	-	-	3048.86	2888.54	3692.84	1374.56	694.013	1028.57
FvH4_1g14890	222.091	-1.53885	0.419655	-3.66695	0.00024546	0.0228053	-	-	-	-	-	-	241.847	375.183	275.608	184.57	72.5881	50.4019
FvH4_6g18630	297.585	-1.50515	0.348733	-4.31607	1.59e-05	0.00298597	gi|764603065|ref|XP_011466764.1|	PREDICTED: uncharacterized protein LOC105352154 [Fragaria vesca subsp. vesca]	BIC1_ARATH	Protein BIC1 OS=Arabidopsis thaliana OX=3702 GN=BIC1 PE=1 SV=1	AT3G52740.1	-	43.6117	45.5319	52.7119	15.5428	17.7044	16.8006
FvH4_2g26080	1396.96	-1.4688	0.373634	-3.9311	8.46e-05	0.0104747	-	-	-	-	-	Putative transcription factor AP2-EREBP family OS=Rosa chinensis OX=74649 GN=RchiOBHm_Chr6g0294441 PE=4 SV=1	1518.48	4551.37	4348.73	1072.45	1200.36	1491.52
FvH4_5g15480	805.664	-1.45188	0.302711	-4.79624	1.62e-06	0.000533131	-	-	VDAC2_SOLTU	Mitochondrial outer membrane protein porin of 36 kDa OS=Solanum tuberosum OX=4113 PE=1 SV=2	-	-	2776.28	3474.08	4268.91	1071.48	1442.91	1330.98
FvH4_1g23330	225.553	-1.44194	0.336402	-4.28636	1.82e-05	0.00322154	-	-	-	-	-	-	199.226	333.293	446.545	137.942	85.8664	137.205
FvH4_3g30620	1428.97	-1.40321	0.222953	-6.29375	3.1e-10	2.59e-07	-	-	-	-	-	Superoxide dismutase [Cu-Zn] OS=Prunus persica OX=3760 GN=CSD-b PE=2 SV=1	1528.39	2112.68	2081.37	870.395	577.164	716.827
FvH4_1g18850	24831.9	-1.34363	0.270168	-4.9733	6.58e-07	0.000256855	gi|470103779|ref|XP_004288307.1|	PREDICTED: phosphoenolpyruvate carboxykinase [ATP]	-	-	-	Putative carboxy-lyase OS=Rosa chinensis OX=74649 GN=RchiOBHm_Chr2g0109721 PE=3 SV=1	40291.3	43889.1	56865.6	10162.1	21949	23464.9
FvH4_6g32560	426.908	-1.33441	0.297975	-4.47827	7.53e-06	0.00181293	-	-	VSPA_SOYBN	Stem 28 kDa glycoprotein OS=Glycine max OX=3847 GN=VSPA PE=2 SV=1	AT4G25150.1	-	909.899	1067.27	1477.44	520.683	474.478	375.214
FvH4_4g12960	5822.42	-1.33377	0.294422	-4.53013	5.89e-06	0.00155073	-	-	-	-	-	Xyloglucan endotransglucosylase/hydrolase OS=Rosa x borboniana OX=358216 GN=XTH12 PE=2 SV=2	1840.61	2629.01	2582.88	876.224	977.284	944.569
FvH4_7g16300	210.944	-1.31985	0.383562	-3.44103	0.000579514	0.0388773	gi|470141937|ref|XP_004306680.1|	PREDICTED: cyclic nucleotide-gated ion channel 1-like [Fragaria vesca subsp. vesca]	CNGC1_ARATH	Cyclic nucleotide-gated ion channel 1 OS=Arabidopsis thaliana OX=3702 GN=CNGC1 PE=1 SV=1	AT5G53130.1	-	301.317	333.293	308.741	112.685	136.324	128.805
FvH4_7g32040	320.108	-1.3038	0.380961	-3.42239	0.000620722	0.0402575	-	-	-	-	-	-	172.464	213.089	118.978	33.0284	84.9812	85.8699
FvH4_3g38530	6865.85	-1.28318	0.317332	-4.04365	5.26e-05	0.00733403	-	-	-	-	-	Vacuolar cation/proton exchanger OS=Rosa chinensis OX=74649 GN=RchiOBHm_Chr5g0069431 PE=3 SV=1	27465.5	26600.6	32472.8	7252.65	15417.9	12887
FvH4_2g33280	311.638	-1.2323	0.297918	-4.13638	3.53e-05	0.00532958	-	-	-	-	-	Uncharacterized protein OS=Rosa chinensis OX=74649 GN=RchiOBHm_Chr6g0309361 PE=4 SV=1	374.664	469.889	441.274	135.999	196.519	214.675
FvH4_6g35192	375.971	-1.19575	0.300543	-3.97863	6.93e-05	0.00896606	-	-	GLO4_ARATH	Peroxisomal (S)-2-hydroxy-acid oxidase GLO4 OS=Arabidopsis thaliana OX=3702 GN=GLO4 PE=2 SV=1	AT3G14130.3	-	1104.17	1335.91	1299.72	483.769	497.494	651.491
FvH4_3g42340	249.881	-1.17745	0.305238	-3.85749	0.000114558	0.0130202	-	-	PP304_ARATH	Pentatricopeptide repeat-containing protein At4g04790, mitochondrial OS=Arabidopsis thaliana OX=3702 GN=At4g04790 PE=2 SV=2	AT4G04790.2	Putative pentacotripeptide-repeat region of PROPR OS=Rosa chinensis OX=74649 GN=RchiOBHm_Chr4g0410111 PE=4 SV=1	337.991	289.583	223.649	147.656	123.931	104.537
FvH4_1g14560	1273.79	-1.16618	0.273866	-4.25823	2.06e-05	0.00352143	gi|1358173292|gb|PRQ47767.1|	hypothetical protein RchiOBHm_Chr2g0103311 [Rosa chinensis]	-	-	-	Uncharacterized protein OS=Rosa chinensis OX=74649 GN=RchiOBHm_Chr2g0103311 PE=4 SV=1	2439.28	4168.9	3620.55	1913.7	1328.72	1316.05
FvH4_2g14410	1017.68	-1.16495	0.285611	-4.07878	4.53e-05	0.00650283	gi|470108491|ref|XP_004290550.1|	PREDICTED: LRR receptor-like serine/threonine-protein kinase RCH1 [Fragaria vesca subsp. vesca]	-	-	-	Uncharacterized protein OS=Rosa chinensis OX=74649 GN=RchiOBHm_Chr6g0276741 PE=3 SV=1	502.526	592.825	708.598	146.685	350.547	307.078
FvH4_5g10770	285.577	-1.16115	0.329142	-3.52782	0.000418992	0.0335292	gi|764641700|ref|XP_011470892.1|	PREDICTED: protein BRANCHLESS TRICHOME [Fragaria vesca subsp. vesca]	BLT_ARATH	Protein BRANCHLESS TRICHOME OS=Arabidopsis thaliana OX=3702 GN=BLT PE=1 SV=1	AT1G64690.4	-	295.37	216.732	265.065	56.3425	184.126	106.404
FvH4_2g34230	1545.02	-1.1363	0.32599	-3.4857	0.000490843	0.0356801	-	-	SBT19_ARATH	Subtilisin-like protease SBT1.9 OS=Arabidopsis thaliana OX=3702 GN=SBT1.9 PE=2 SV=1	-	Putative tripeptidyl-peptidase II OS=Rosa chinensis OX=74649 GN=RchiOBHm_Chr6g0308191 PE=4 SV=1	1714.73	909.727	1408.91	551.768	817.944	464.818
FvH4_5g33600	176.999	-1.05289	0.301734	-3.48946	0.000484	0.0356801	gi|1366043767|ref|XP_024172175.1|	xylulose kinase 2-like [Rosa chinensis]	-	-	AT5G49650.2	-	86.2322	94.7063	121.237	50.514	68.162	27.0677
FvH4_6g40300	2254.55	-1.0336	0.304988	-3.38901	0.000701465	0.0440306	-	-	AIR3_ARATH	Subtilisin-like protease SBT5.3 OS=Arabidopsis thaliana OX=3702 GN=AIR3 PE=2 SV=1	AT2G04160.1	-	5783.51	6440.94	7953.47	1589.25	4025.1	4242.16
FvH4_4g22060	288.375	-1.01788	0.261408	-3.89383	9.87e-05	0.0115552	-	-	-	-	-	Putative heparan-alpha-glucosaminide N-acetyltransferase OS=Rosa chinensis OX=74649 GN=RchiOBHm_Chr4g0428311 PE=4 SV=1	408.364	450.766	469.889	185.542	196.519	274.41
FvH4_3g37301	651.486	1.01266	0.184863	5.47791	4.3e-08	2.34e-05	-	-	FB246_ARATH	Putative F-box protein At4g22660 OS=Arabidopsis thaliana OX=3702 GN=At4g22660 PE=4 SV=1	AT4G22660.1	Putative F-box domain-containing protein OS=Rosa chinensis OX=74649 GN=RchiOBHm_Chr4g0430971 PE=4 SV=1	498.561	402.502	521.095	1016.11	1073.77	780.296
FvH4_4g18630	1706.59	1.01878	0.290583	3.50599	0.000454917	0.0348071	gi|470121627|ref|XP_004296864.1|	PREDICTED: RING-H2 finger protein ATL2 [Fragaria vesca subsp. vesca]	-	-	-	Putative transcription factor C2H2 family OS=Rosa chinensis OX=74649 GN=RchiOBHm_Chr4g0423331 PE=4 SV=1	3546.42	2456.9	2025.64	6036.42	5403.39	4826.45
FvH4_6g26170	2131.39	1.0297	0.236487	4.35416	1.34e-05	0.00275492	gi|470134629|ref|XP_004303150.1|	PREDICTED: E3 ubiquitin-protein ligase RMA1H1-like [Fragaria vesca subsp. vesca]	RMA1_CAPAN	E3 ubiquitin-protein ligase RMA1H1 OS=Capsicum annuum OX=4072 GN=RMA1H1 PE=1 SV=1	AT4G03510.4	-	511.446	499.029	346.392	1160.85	963.12	644.024
FvH4_7g04760	4427.08	1.03195	0.200428	5.14874	2.62e-07	0.000127913	-	-	UBP13_ARATH	Ubiquitin carboxyl-terminal hydrolase 13 OS=Arabidopsis thaliana OX=3702 GN=UBP13 PE=1 SV=1	AT3G11910.3	-	6953.09	5678.74	5329.17	14931.7	11622.1	10170.9
FvH4_1g26340	567.769	1.04306	0.272977	3.82107	0.000132873	0.0142704	-	-	RADL3_ARATH	Protein RADIALIS-like 3 OS=Arabidopsis thaliana OX=3702 GN=RL3 PE=2 SV=1	AT1G75250.2	Putative transcription factor MYB-HB-like family OS=Rosa chinensis OX=74649 GN=RchiOBHm_Chr3g0486111 PE=4 SV=1	88.2146	89.2425	133.286	231.199	230.157	181.074
FvH4_2g31471	781.263	1.04416	0.308224	3.38767	0.000704889	0.0441272	-	-	-	-	-	Putative harbinger transposase-derived nuclease domain-containing protein OS=Rosa chinensis OX=74649 GN=RchiOBHm_Chr6g0311321 PE=4 SV=1	703.734	662.034	729.683	1477.53	1409.27	1434.59
FvH4_2g39820	336.405	1.04435	0.294639	3.5445	0.000393352	0.0326545	gi|764546318|ref|XP_011459553.1|	PREDICTED: parathymosin-like [Fragaria vesca subsp. vesca]	-	-	-	Uncharacterized protein OS=Rosa chinensis OX=74649 GN=RchiOBHm_Chr6g0301021 PE=4 SV=1	132.817	91.0638	123.496	341.941	194.749	180.14
FvH4_3g02140	3740.4	1.0448	0.312086	3.34779	0.000814601	0.0486927	gi|470114161|ref|XP_004293285.1|	PREDICTED: uncharacterized protein LOC101291898 [Fragaria vesca subsp. vesca]	-	-	AT1G11700.1	Putative senescence regulator S40 OS=Rosa chinensis OX=74649 GN=RchiOBHm_Chr5g0003211 PE=4 SV=1	1794.03	1044.5	1161.17	2314.9	2676.91	3258.39
FvH4_3g21580	910.649	1.05129	0.285765	3.67886	0.000234277	0.022207	gi|470116309|ref|XP_004294325.1|	PREDICTED: scarecrow-like protein 21 [Fragaria vesca subsp. vesca]	-	-	-	Putative transcription factor GRAS family OS=Rosa chinensis OX=74649 GN=RchiOBHm_Chr5g0037031 PE=3 SV=1	1005.05	675.693	670.947	2271.19	1565.07	1036.04
FvH4_3g09780	638.44	1.05568	0.280485	3.76378	0.000167367	0.0173388	-	-	SCGT_TOBAC	Scopoletin glucosyltransferase OS=Nicotiana tabacum OX=4097 GN=TOGT1 PE=1 SV=1	AT4G34131.1	Glycosyltransferase OS=Rosa chinensis OX=74649 GN=RchiOBHm_Chr6g0256511 PE=3 SV=1	521.358	302.332	376.513	1124.91	846.271	522.687
FvH4_4g01400	2799.55	1.05601	0.181902	5.8054	6.42e-09	4.06e-06	-	-	C7A12_MEDTR	Beta-amyrin 28-monooxygenase OS=Medicago truncatula OX=3880 GN=CYP716A12 PE=1 SV=1	AT5G36110.1	Putative cytochrome P450 OS=Rosa chinensis OX=74649 GN=RchiOBHm_Chr4g0384991 PE=3 SV=1	1236.99	1378.71	1385.57	3304.78	2641.5	2374.49
FvH4_4g17180	8045.35	1.05657	0.289493	3.64973	0.000262515	0.024103	gi|470121476|ref|XP_004296793.1|	PREDICTED: inactive beta-amylase 9 [Fragaria vesca subsp. vesca]	-	-	-	Beta-amylase OS=Rosa chinensis OX=74649 GN=RchiOBHm_Chr4g0420971 PE=3 SV=1	6065.99	4791.77	3974.48	15665.2	9432.03	5752.35
FvH4_4g31210	631.004	1.05794	0.28471	3.71584	0.00020253	0.0199237	gi|470122531|ref|XP_004297294.1|	PREDICTED: cyclic dof factor 3 [Fragaria vesca subsp. vesca]	-	-	-	-	650.211	446.212	418.683	1400.79	957.809	794.297
FvH4_1g07981	2256.54	1.07047	0.312099	3.4299	0.000603812	0.0399381	gi|764510022|ref|XP_011460386.1|	PREDICTED: putative nuclease HARBI1 [Fragaria vesca subsp. vesca]	ALPL_ARATH	Protein ALP1-like OS=Arabidopsis thaliana OX=3702 GN=At3g55350 PE=2 SV=1	AT5G12010.1	Putative harbinger transposase-derived nuclease domain-containing protein OS=Rosa chinensis OX=74649 GN=RchiOBHm_Chr2g0094021 PE=4 SV=1	5857.85	3306.52	3224.46	9399.49	10699.7	5916.63
FvH4_4g19010	25363	1.08964	0.316604	3.44165	0.000578169	0.0388773	-	-	-	-	-	Fra a 3 allergen OS=Fragaria ananassa OX=3747 GN=Fraa3 PE=1 SV=1	11512.5	12352.8	14600.4	48037.8	17971.8	15855.1
FvH4_5g18100	6144.07	1.09332	0.266167	4.10766	4e-05	0.00596057	gi|764584854|ref|XP_011464451.1|	PREDICTED: protein REVEILLE 7-like isoform X1 [Fragaria vesca subsp. vesca]	RVE7_ARATH	Protein REVEILLE 7 OS=Arabidopsis thaliana OX=3702 GN=RVE7 PE=2 SV=1	AT1G18330.1	-	3745.65	2641.76	2844.18	9586	5526.43	4583.77
FvH4_5g17240	2268.74	1.10191	0.319589	3.4479	0.000564955	0.0384515	gi|470127141|ref|XP_004299534.1|	PREDICTED: probable calcium-binding protein CML27 [Fragaria vesca subsp. vesca]	-	-	-	-	3252.05	2754.68	2318.57	6429.85	6747.15	4691.11
FvH4_7g30310	2088.74	1.10206	0.32814	3.35852	0.000783624	0.0474083	gi|470144825|ref|XP_004308048.1|	PREDICTED: FK506-binding protein 4-like [Fragaria vesca subsp. vesca]	HIP12_ARATH	Heavy metal-associated isoprenylated plant protein 12 OS=Arabidopsis thaliana OX=3702 GN=HIPP12 PE=3 SV=1	AT5G52740.1	-	1637.42	1065.45	1325.33	4837.69	2004.14	1805.14
FvH4_7g25640	153.91	1.1027	0.317874	3.469	0.000522403	0.0369517	gi|470146722|ref|XP_004308971.1|	PREDICTED: CBL-interacting protein kinase 18-like [Fragaria vesca subsp. vesca]	CIPK2_ORYSJ	CBL-interacting protein kinase 2 OS=Oryza sativa subsp. japonica OX=39947 GN=CIPK2 PE=2 SV=1	AT5G58380.1	-	57.4882	61.9234	70.7845	169.028	147.832	92.4035
FvH4_7g03990	647.822	1.10538	0.240103	4.60378	4.15e-06	0.00111652	gi|470143056|ref|XP_004307203.1|	PREDICTED: cytochrome P450 CYP72A219-like isoform X1 [Fragaria vesca subsp. vesca]	C7A29_PANGI	Cytochrome P450 CYP72A219 OS=Panax ginseng OX=4054 PE=2 SV=1	AT3G14690.2	-	502.526	475.353	417.177	1190.96	876.369	933.369
FvH4_5g22100	2382.48	1.11834	0.254471	4.39475	1.11e-05	0.00244691	gi|470128629|ref|XP_004300239.1|	PREDICTED: transcription factor MYC2-like [Fragaria vesca subsp. vesca]	MYC2_ARATH	Transcription factor MYC2 OS=Arabidopsis thaliana OX=3702 GN=MYC2 PE=1 SV=2	AT1G32640.1	-	4260.07	2555.25	2815.57	5960.65	8630.02	6315.17
FvH4_3g22740	1644.55	1.11865	0.316941	3.52952	0.000416311	0.0335292	gi|470116434|ref|XP_004294387.1|	PREDICTED: protein translation factor SUI1 homolog [Fragaria vesca subsp. vesca]	SUI1_MAIZE	Protein translation factor SUI1 homolog OS=Zea mays OX=4577 GN=TIF PE=3 SV=1	AT5G54940.3	Putative eukaryotic translation initiation factor SUI1 OS=Rosa chinensis OX=74649 GN=RchiOBHm_Chr5g0039691 PE=4 SV=1	997.122	642.91	460.852	1418.28	1748.31	1392.59
FvH4_5g18290	444.873	1.12331	0.326243	3.44316	0.000574949	0.0388773	gi|470130662|ref|XP_004301222.1|	PREDICTED: uncharacterized protein LOC101308473 [Fragaria vesca subsp. vesca]	-	-	-	-	76.3205	55.5489	77.5618	248.684	116.849	91.4701
FvH4_1g12030	5158.48	1.13669	0.238568	4.76462	1.89e-06	0.000595755	-	-	H1_SOLPN	Histone H1 OS=Solanum pennellii OX=28526 PE=2 SV=1	AT2G18050.1	Uncharacterized protein OS=Jatropha curcas OX=180498 GN=JCGZ_06500 PE=3 SV=1	4343.33	3598.84	4138.64	13473.6	6774.59	6315.17
FvH4_6g42220	710.163	1.13911	0.304939	3.73555	0.000187306	0.018741	gi|764613359|ref|XP_011467771.1|	PREDICTED: uncharacterized protein LOC101301121 isoform X2 [Fragaria vesca subsp. vesca]	-	-	-	-	7.9294	18.2128	25.6029	40.7998	33.6384	42.935
FvH4_2g05210	650.554	1.14461	0.335522	3.41142	0.000646243	0.0414795	gi|470140452|ref|XP_004305954.1|	PREDICTED: transcription factor MYB44-like [Fragaria vesca subsp. vesca]	MYB44_ARATH	Transcription factor MYB44 OS=Arabidopsis thaliana OX=3702 GN=MYB44 PE=1 SV=1	AT2G23290.1	Putative transcription factor MYB-HB-like family OS=Rosa chinensis OX=74649 GN=RchiOBHm_Chr6g0255341 PE=4 SV=1	561.996	708.476	466.877	952.966	1714.67	1172.31
FvH4_3g21340	784.264	1.16147	0.238787	4.86406	1.15e-06	0.000395963	gi|764560017|ref|XP_011461129.1|	PREDICTED: calcium-binding protein PBP1 [Fragaria vesca subsp. vesca]	CARP1_ARATH	Calcium-binding protein KRP1 OS=Arabidopsis thaliana OX=3702 GN=KRP1 PE=2 SV=1	AT4G27280.1	Putative EF-hand domain pair protein OS=Rosa chinensis OX=74649 GN=RchiOBHm_Chr5g0036541 PE=4 SV=1	1341.06	1005.34	927.729	2599.53	2209.51	2512.63
FvH4_3g19450	2360.64	1.1706	0.260992	4.48521	7.28e-06	0.00177654	-	-	ERF78_ARATH	Ethylene-responsive transcription factor 4 OS=Arabidopsis thaliana OX=3702 GN=ERF4 PE=1 SV=1	AT3G15210.1	Putative transcription factor AP2-EREBP family OS=Rosa chinensis OX=74649 GN=RchiOBHm_Chr5g0032721 PE=4 SV=1	4741.78	2985.07	3060.3	5660.48	10700.5	7918.7
FvH4_5g14100	1727.02	1.17483	0.259886	4.52056	6.17e-06	0.00160447	-	-	-	-	-	-	1057.58	802.272	748.509	1654.33	1753.62	2479.03
FvH4_7g33590	879.439	1.19334	0.204077	5.84749	4.99e-09	3.25e-06	-	-	-	-	-	-	864.305	682.068	873.511	2058.45	2041.32	1434.59
FvH4_5g22810	626.56	1.19901	0.284428	4.2155	2.49e-05	0.00413846	gi|764590399|ref|XP_011465140.1|	PREDICTED: indole-3-acetic acid-induced protein ARG7-like [Fragaria vesca subsp. vesca]	ARG7_VIGRR	Indole-3-acetic acid-induced protein ARG7 OS=Vigna radiata var. radiata OX=3916 GN=ARG7 PE=2 SV=1	AT5G18020.1	-	24.7794	46.4425	22.5908	84.5138	62.8507	67.2026
FvH4_5g12150	2132.28	1.20137	0.305033	3.93849	8.2e-05	0.0102117	gi|470129230|ref|XP_004300528.1|	PREDICTED: zinc finger protein CONSTANS-LIKE 6-like [Fragaria vesca subsp. vesca]	COL16_ARATH	Zinc finger protein CONSTANS-LIKE 16 OS=Arabidopsis thaliana OX=3702 GN=COL16 PE=1 SV=2	AT1G25440.1	-	152.641	160.272	155.124	367.198	347.007	362.147
FvH4_4g35180	425.029	1.20344	0.303872	3.96034	7.48e-05	0.00952945	gi|470123326|ref|XP_004297678.1|	PREDICTED: metalloendoproteinase 1-like [Fragaria vesca subsp. vesca]	2MMP_ARATH	Metalloendoproteinase 2-MMP OS=Arabidopsis thaliana OX=3702 GN=2MMP PE=1 SV=1	AT1G70170.1	-	102.091	111.098	97.8935	233.142	286.812	196.007
FvH4_4g16740	1087.46	1.20786	0.291204	4.14782	3.36e-05	0.00521093	-	-	-	-	-	Uncharacterized protein OS=Rosa chinensis OX=74649 GN=RchiOBHm_Chr4g0420321 PE=4 SV=1	582.811	621.055	450.31	1094.79	1244.62	1480.32
FvH4_5g39020	1017.98	1.20916	0.352133	3.4338	0.00059518	0.0397007	gi|470129048|ref|XP_004300441.1|	PREDICTED: probable calcium-binding protein CML29 [Fragaria vesca subsp. vesca]	-	-	-	-	17.8412	29.1404	12.0484	46.6283	56.6541	31.7345
FvH4_7g24560	8887.1	1.21703	0.290625	4.18762	2.82e-05	0.00458325	-	-	C3H29_ARATH	Zinc finger CCCH domain-containing protein 29 OS=Arabidopsis thaliana OX=3702 GN=At2g40140 PE=1 SV=1	AT2G40140.2	-	14972.7	9457.88	9076.23	38740.4	25278.4	13871.7
FvH4_3g04670	2685.85	1.22007	0.275013	4.4364	9.15e-06	0.00207933	gi|470114654|ref|XP_004293526.1|	PREDICTED: polyphenol oxidase, chloroplastic-like [Fragaria vesca subsp. vesca]	PPO_MALDO	Polyphenol oxidase, chloroplastic OS=Malus domestica OX=3750 PE=2 SV=1	-	Chloroplast polyphenol oxidase I OS=Eriobotrya japonica OX=32224 GN=PPO1 PE=2 SV=1	463.87	639.268	588.114	979.195	1428.75	1532.59
FvH4_2g13680	1771.12	1.22053	0.295812	4.12603	3.69e-05	0.00553916	-	-	-	-	-	Uncharacterized protein OS=Rosa chinensis OX=74649 GN=RchiOBHm_Chr6g0275361 PE=4 SV=1	2687.08	1311.32	1256.05	4241.23	5027.17	2972.78
FvH4_5g36920	2030.25	1.23231	0.320754	3.84192	0.000122073	0.0134183	-	-	EXO_ARATH	Protein EXORDIUM OS=Arabidopsis thaliana OX=3702 GN=EXO PE=2 SV=1	AT4G08950.1	-	4163.93	2591.67	2605.47	9978.46	8309.57	3703.61
FvH4_7g22750	540.162	1.2386	0.35326	3.50619	0.00045457	0.0348071	-	-	-	-	AT3G09110.1	-	82.2675	77.4042	46.6877	81.5995	277.959	125.071
FvH4_6g07790	1467.36	1.23994	0.284298	4.36141	1.29e-05	0.00272576	gi|470138322|ref|XP_004304906.1|	PREDICTED: uncharacterized protein LOC101315073 [Fragaria vesca subsp. vesca]	CAB25_ARATH	Calmodulin-binding protein 25 OS=Arabidopsis thaliana OX=3702 GN=CAMBP25 PE=1 SV=1	AT3G56880.1	-	2479.92	1945.12	1676.24	5684.77	4514.63	4209.49
FvH4_4g06830	679.176	1.24127	0.285951	4.34085	1.42e-05	0.00285136	gi|470127689|ref|XP_004299798.1|	PREDICTED: probable WRKY transcription factor 11 [Fragaria vesca subsp. vesca]	-	-	-	Putative transcription factor WRKY family OS=Rosa chinensis OX=74649 GN=RchiOBHm_Chr4g0398741 PE=4 SV=1	677.964	364.255	451.816	1468.79	1361.47	700.027
FvH4_3g20690	2099.94	1.25262	0.316204	3.96144	7.45e-05	0.00952945	-	-	NAC72_ARATH	NAC domain-containing protein 72 OS=Arabidopsis thaliana OX=3702 GN=NAC072 PE=2 SV=1	AT4G27410.2	Putative transcription factor NAM family OS=Rosa chinensis OX=74649 GN=RchiOBHm_Chr5g0034761 PE=4 SV=1	3147.97	2557.07	2174.74	9890.06	4861.63	4022.82
FvH4_6g01630	401.354	1.25568	0.359448	3.49337	0.000476965	0.0356779	gi|764596273|ref|XP_011466016.1|	PREDICTED: mediator of RNA polymerase II transcription subunit 25-like isoform X2 [Fragaria vesca subsp. vesca]	MED25_ARATH	Mediator of RNA polymerase II transcription subunit 25 OS=Arabidopsis thaliana OX=3702 GN=MED25 PE=1 SV=1	AT1G25540.1	-	39.647	29.1404	37.6513	46.6283	141.635	65.3358
FvH4_7g25200	218.055	1.2638	0.34119	3.70409	0.000212147	0.0203008	gi|470144074|ref|XP_004307690.1|	PREDICTED: dehydration-responsive element-binding protein 2A-like [Fragaria vesca subsp. vesca]	DRE2C_ARATH	Dehydration-responsive element-binding protein 2C OS=Arabidopsis thaliana OX=3702 GN=DREB2C PE=2 SV=2	AT2G40340.1	-	239.864	360.612	201.811	794.624	724.111	406.949
FvH4_4g18990	113289	1.28178	0.317282	4.03986	5.35e-05	0.0074095	-	-	-	-	-	Fra a 1 allergen OS=Fragaria ananassa OX=3747 GN=fraa1.1 PE=4 SV=1	14450.3	14221.4	14705.9	62084.6	24424.1	18959.5
FvH4_6g15581	654.896	1.28302	0.309129	4.15044	3.32e-05	0.00521093	gi|470137309|ref|XP_004304411.1|	PREDICTED: uncharacterized protein LOC101305283 [Fragaria vesca subsp. vesca]	-	-	-	-	329.07	335.115	269.584	1202.62	520.51	548.821
FvH4_5g06740	6163.95	1.2914	0.26145	4.93937	7.84e-07	0.00029376	-	-	-	-	-	-	816.728	449.855	554.228	1235.65	1637.66	1581.13
FvH4_3g36860	1239.39	1.29368	0.262867	4.92141	8.59e-07	0.000304807	-	-	RDUF2_ARATH	E3 ubiquitin-protein ligase RDUF2 OS=Arabidopsis thaliana OX=3702 GN=DURF2 PE=1 SV=1	AT5G59550.1	Putative aminoacyltransferase, E1 ubiquitin-activating enzyme OS=Rosa chinensis OX=74649 GN=RchiOBHm_Chr5g0066071 PE=4 SV=1	1887.2	1122.82	1346.41	2989.07	4434.96	3253.72
FvH4_3g04160	1038.76	1.2943	0.374544	3.45567	0.00054892	0.0381361	-	-	-	-	-	Uncharacterized protein OS=Rosa chinensis OX=74649 GN=RchiOBHm_Chr5g0006611 PE=4 SV=1	1533.35	1705.62	1406.65	6579.45	2846.87	1967.54
FvH4_5g17362	172.695	1.30888	0.275009	4.75942	1.94e-06	0.000598096	gi|1358183792|gb|PRQ58266.1|	hypothetical protein RchiOBHm_Chr1g0357401 [Rosa chinensis]	-	-	-	-	133.809	122.025	157.383	254.513	377.104	392.948
FvH4_2g27293	129.928	1.31107	0.303821	4.31526	1.59e-05	0.00298597	-	-	-	-	-	Putative RNA-directed DNA polymerase OS=Rosa chinensis OX=74649 GN=RchiOBHm_Chr5g0041201 PE=4 SV=1	51.5411	58.2808	42.1695	134.056	111.538	130.672
FvH4_4g35790	11053.8	1.31285	0.389739	3.36853	0.000755697	0.0463363	-	-	UGTK5_MANES	Linamarin synthase 2 OS=Manihot esculenta OX=3983 GN=UGT85K5 PE=1 SV=1	AT1G22400.1	-	1679.05	957.991	676.218	1600.91	3538.23	3089.45
FvH4_2g37530	6371.61	1.31911	0.384582	3.42998	0.000603617	0.0399381	gi|470113407|ref|XP_004292915.1|	PREDICTED: uncharacterized protein LOC101299355 isoform X2 [Fragaria vesca subsp. vesca]	-	-	AT1G42430.1	Uncharacterized protein OS=Rosa chinensis OX=74649 GN=RchiOBHm_Chr6g0304201 PE=4 SV=1	5576.35	3790.98	4230.51	20664.1	6506.37	6757.59
FvH4_6g44270	1023.17	1.32094	0.219808	6.0095	1.86e-09	1.41e-06	-	-	MIP1B_ARATH	B-box domain protein 31 OS=Arabidopsis thaliana OX=3702 GN=MIP1B PE=2 SV=1	AT4G27310.1	-	1614.62	1347.74	1237.98	3675.87	3842.74	2972.78
FvH4_5g25150	476.663	1.32302	0.377944	3.50056	0.000464285	0.0351438	gi|470129565|ref|XP_004300683.1|	PREDICTED: abscisic acid 8'-hydroxylase 1-like [Fragaria vesca subsp. vesca]	ABAH2_SOLLC	Abscisic acid 8'-hydroxylase CYP707A2 OS=Solanum lycopersicum OX=4081 GN=CYP707A2 PE=2 SV=1	AT4G19230.1	-	305.282	101.991	131.027	660.568	396.579	287.478
FvH4_5g02080	3140.96	1.34438	0.356134	3.77493	0.000160056	0.0168044	-	-	4CLLA_ARATH	Oxalate--CoA ligase OS=Arabidopsis thaliana OX=3702 GN=AAE3 PE=1 SV=1	-	-	2699.96	1642.79	1215.39	5492.43	5017.43	3600.94
FvH4_2g08290	282.476	1.34569	0.372236	3.61517	0.000300153	0.0268225	-	-	FBK50_ARATH	F-box/kelch-repeat protein At3g06240 OS=Arabidopsis thaliana OX=3702 GN=At3g06240 PE=2 SV=1	AT3G06240.1	Putative F-box domain-containing protein OS=Rosa chinensis OX=74649 GN=RchiOBHm_Chr2g0154521 PE=4 SV=1	99.1175	96.5276	156.63	514.854	208.912	173.607
FvH4_3g08750	5421.36	1.3519	0.240327	5.62525	1.85e-08	1.03e-05	gi|470115311|ref|XP_004293846.1|	PREDICTED: ethylene-responsive transcription factor 4 [Fragaria vesca subsp. vesca]	ERF4_NICSY	Ethylene-responsive transcription factor 4 OS=Nicotiana sylvestris OX=4096 GN=ERF4 PE=2 SV=1	-	Putative transcription factor AP2-EREBP family OS=Rosa chinensis OX=74649 GN=RchiOBHm_Chr5g0008991 PE=4 SV=1	8592.5	5237.08	4937.6	17268	17374.2	13256.6
FvH4_7g22850	785.763	1.35244	0.305742	4.42347	9.71e-06	0.00218658	-	-	RDUF1_ARATH	E3 ubiquitin-protein ligase RDUF1 OS=Arabidopsis thaliana OX=3702 GN=RDUF1 PE=1 SV=1	AT3G46620.1	-	886.111	544.561	381.785	1329.88	1983.78	1310.45
FvH4_2g15100	140.814	1.36379	0.362974	3.75725	0.000171789	0.0176408	-	-	-	-	-	-	29.7353	62.834	69.2785	138.914	143.406	136.272
FvH4_5g36910	1057.52	1.36817	0.382599	3.576	0.00034889	0.0299215	-	-	EXO_ARATH	Protein EXORDIUM OS=Arabidopsis thaliana OX=3702 GN=EXO PE=2 SV=1	AT4G08950.1	-	1634.45	806.825	774.112	4548.2	2574.22	1176.04
FvH4_3g08470	1201.02	1.37183	0.336697	4.07438	4.61e-05	0.00658674	-	-	-	-	-	Putative glutaredoxin-like, plant II, thioredoxin-like protein OS=Rosa chinensis OX=74649 GN=RchiOBHm_Chr5g0009361 PE=4 SV=1	1088.31	573.702	554.228	1797.13	2112.14	1823.8
FvH4_5g36040	250.759	1.38537	0.404327	3.42635	0.000611762	0.0401178	gi|764586253|ref|XP_011464628.1|	PREDICTED: purine permease 3-like [Fragaria vesca subsp. vesca]	PUP3_ARATH	Purine permease 3 OS=Arabidopsis thaliana OX=3702 GN=PUP3 PE=2 SV=1	AT1G28220.1	-	193.279	160.272	106.93	718.853	266.451	216.542
FvH4_6g54120	1354.56	1.39142	0.367147	3.78982	0.000150756	0.0161172	-	-	-	-	-	-	1857.46	1007.17	1206.35	6069.45	3048.7	1560.59
FvH4_2g22530	2420.77	1.42559	0.282655	5.04358	4.57e-07	0.000201841	gi|470107129|ref|XP_004289902.1|	PREDICTED: auxin-induced protein 22D-like [Fragaria vesca subsp. vesca]	AX22D_VIGRR	Auxin-induced protein 22D OS=Vigna radiata var. radiata OX=3916 GN=AUX22D PE=2 SV=1	AT5G43700.1	Auxin-responsive protein OS=Rosa chinensis OX=74649 GN=RchiOBHm_Chr6g0289581 PE=3 SV=1	378.629	298.689	253.017	643.082	1347.31	505.886
FvH4_4g11391	225.723	1.42639	0.366329	3.89375	9.87e-05	0.0115552	-	-	-	-	-	-	172.464	161.183	126.509	422.569	354.974	458.284
FvH4_3g37570	5129.73	1.43522	0.304211	4.71784	2.38e-06	0.000697588	gi|764558410|ref|XP_004294269.2|	PREDICTED: uncharacterized protein LOC101298296 [Fragaria vesca subsp. vesca]	-	-	AT3G09110.1	Uncharacterized protein OS=Rosa chinensis OX=74649 GN=RchiOBHm_Chr5g0067491 PE=4 SV=1	1979.38	3573.34	3676.28	10736.2	8319.3	5904.49
FvH4_5g03343	599.37	1.44063	0.415525	3.46702	0.000526271	0.0370181	-	-	-	-	-	-	253.741	344.221	304.976	1067.59	779.879	603.89
FvH4_5g04760	356.303	1.44177	0.335391	4.29877	1.72e-05	0.00316629	-	-	-	-	-	-	196.253	222.196	170.937	851.938	423.136	325.746
FvH4_2g33250	2874.53	1.44336	0.362182	3.98517	6.74e-05	0.00877116	-	-	-	-	-	Putative transcription factor C2H2 family OS=Rosa chinensis OX=74649 GN=RchiOBHm_Chr6g0309391 PE=4 SV=1	4763.59	2753.77	2933.79	10295.1	10220.8	7904.7
FvH4_3g29360	1220.23	1.46517	0.424504	3.45148	0.000557524	0.0381675	-	-	NFYB3_ARATH	Nuclear transcription factor Y subunit B-3 OS=Arabidopsis thaliana OX=3702 GN=NFYB3 PE=1 SV=1	-	Nuclear transcription factor Y subunit B-3-like OS=Malus domestica OX=3750 GN=NF-YB3 PE=2 SV=1	376.647	313.259	298.199	1796.16	491.298	440.55
FvH4_7g33120	543.627	1.4655	0.420992	3.48107	0.000499423	0.0358681	gi|764639814|ref|XP_011470663.1|	PREDICTED: probable L-type lectin-domain containing receptor kinase S.7 [Fragaria vesca subsp. vesca]	LRKS7_ARATH	Probable L-type lectin-domain containing receptor kinase S.7 OS=Arabidopsis thaliana OX=3702 GN=LECRKS7 PE=2 SV=1	AT5G55830.1	-	374.664	162.093	164.16	1138.51	511.658	283.744
FvH4_3g38990	1518.63	1.47121	0.367687	4.00127	6.3e-05	0.00838083	-	-	-	-	-	Uncharacterized protein OS=Rosa chinensis OX=74649 GN=RchiOBHm_Chr5g0070291 PE=3 SV=1	2612.74	1666.47	1566.3	9134.29	4768.68	2302.62
FvH4_2g15841	80.4516	1.48114	0.434203	3.41116	0.000646878	0.0414795	gi|1358182015|gb|PRQ56489.1|	putative RNA-directed DNA polymerase [Rosa chinensis]	-	-	AT5G53670.1	Putative RNA-directed DNA polymerase OS=Rosa chinensis OX=74649 GN=RchiOBHm_Chr1g0336961 PE=4 SV=1	37.6647	50.9957	30.1211	117.542	127.472	85.8699
FvH4_1g10770	2416.93	1.49626	0.374484	3.99553	6.45e-05	0.00849029	-	-	LHTL8_ARATH	Lysine histidine transporter-like 8 OS=Arabidopsis thaliana OX=3702 GN=AATL1 PE=1 SV=1	AT1G47670.1	Putative amino acid transporter, transmembrane domain-containing protein OS=Rosa chinensis OX=74649 GN=RchiOBHm_Chr2g0097951 PE=4 SV=1	1062.54	1544.44	1272.62	6605.68	2097.97	2241.95
FvH4_7g33070	1507.43	1.49774	0.290734	5.15157	2.58e-07	0.000127913	-	-	-	-	-	-	2096.34	1297.66	1429.25	6199.62	4855.44	2563.96
FvH4_5g03341	581.092	1.5042	0.418402	3.5951	0.000324266	0.0285415	-	-	-	-	-	-	185.35	177.574	158.889	592.568	434.643	452.684
FvH4_4g06911	367.275	1.52976	0.331078	4.62055	3.83e-06	0.0010542	-	-	-	-	-	-	37.6647	50.0851	51.9589	215.656	86.7516	102.671
FvH4_6g06320	2685.63	1.53017	0.356959	4.28669	1.81e-05	0.00322154	gi|470133090|ref|XP_004302407.1|	PREDICTED: WW domain-containing protein WWM1-like [Fragaria vesca subsp. vesca]	SRC2_SOYBN	Protein SRC2 OS=Glycine max OX=3847 GN=SRC2 PE=2 SV=1	AT1G09070.1	-	4662.49	2244.72	2271.13	8993.44	10503.1	7009.6
FvH4_2g33780	745.186	1.56904	0.329992	4.75478	1.99e-06	0.000604072	gi|470109570|ref|XP_004291066.1|	PREDICTED: uncharacterized protein LOC101292566 [Fragaria vesca subsp. vesca]	-	-	-	Uncharacterized protein OS=Rosa chinensis OX=74649 GN=RchiOBHm_Chr6g0308771 PE=4 SV=1	493.605	611.948	283.138	1344.45	1280.03	1493.39
FvH4_1g17140	939.036	1.58354	0.380891	4.15748	3.22e-05	0.00509048	gi|470103076|ref|XP_004287971.1|	PREDICTED: uncharacterized protein LOC101300093 [Fragaria vesca subsp. vesca]	-	-	AT2G23110.2	Putative Late embryogenesis abundant protein, LEA-18 OS=Rosa chinensis OX=74649 GN=RchiOBHm_Chr2g0107321 PE=4 SV=1	614.529	407.966	409.647	920.909	1434.06	1935.81
FvH4_1g29930	917.646	1.59097	0.388276	4.09752	4.18e-05	0.00618816	-	-	PUB21_ARATH	U-box domain-containing protein 21 OS=Arabidopsis thaliana OX=3702 GN=PUB21 PE=2 SV=1	AT5G37490.1	RING-type E3 ubiquitin transferase OS=Rosa chinensis OX=74649 GN=RchiOBHm_Chr3g0492391 PE=4 SV=1	1643.37	952.527	859.957	6230.71	2819.43	1358.99
FvH4_6g40844	154.039	1.598	0.437243	3.65473	0.000257456	0.0237315	gi|470146061|ref|XP_004308648.1|	PREDICTED: uncharacterized protein LOC101296334 [Fragaria vesca subsp. vesca]	-	-	AT1G79740.4	-	98.1263	25.4979	113.707	219.542	281.5	218.408
FvH4_5g04370	878.824	1.62475	0.367668	4.41907	9.91e-06	0.00221037	-	-	-	-	-	-	932.696	597.378	596.397	3814.78	1792.57	949.236
FvH4_5g33250	322.233	1.63255	0.38156	4.27862	1.88e-05	0.00328575	-	-	SYVM1_ARATH	Valine--tRNA ligase, mitochondrial 1 OS=Arabidopsis thaliana OX=3702 GN=TWN2 PE=1 SV=2	AT1G14610.1	-	23.7882	7.2851	33.1332	71.8853	57.5393	71.8694
FvH4_1g04810	371.711	1.63347	0.393877	4.14716	3.37e-05	0.00521093	gi|470101946|ref|XP_004287427.1|	PREDICTED: heat stress transcription factor C-1 [Fragaria vesca subsp. vesca]	HSFC1_ARATH	Heat stress transcription factor C-1 OS=Arabidopsis thaliana OX=3702 GN=HSFC1 PE=1 SV=1	AT3G24520.1	Heat shock factor C1a OS=Fragaria vesca OX=57918 PE=2 SV=1	67.3999	69.2085	54.2179	202.056	187.667	201.608
FvH4_5g17620	2580.15	1.63738	0.395043	4.14482	3.4e-05	0.00521093	gi|470127091|ref|XP_004299512.1|	PREDICTED: nudix hydrolase 18, mitochondrial-like [Fragaria vesca subsp. vesca]	NUDT4_ARATH	Nudix hydrolase 4 OS=Arabidopsis thaliana OX=3702 GN=NUDT4 PE=1 SV=1	AT1G18300.1	-	3082.55	2010.69	1516.6	12382.7	5447.65	2731.04
FvH4_3g09070	6413.55	1.64006	0.420072	3.90425	9.45e-05	0.0112332	-	-	-	-	AT4G32480.1	Uncharacterized protein OS=Rosa chinensis OX=74649 GN=RchiOBHm_Chr5g0008561 PE=4 SV=1	1209.23	657.48	867.487	5603.17	2012.99	905.368
FvH4_3g37580	154.456	1.6675	0.385567	4.32481	1.53e-05	0.00292977	gi|764558402|ref|XP_011460896.1|	PREDICTED: uncharacterized protein LOC101291415 [Fragaria vesca subsp. vesca]	-	-	-	Uncharacterized protein OS=Rosa chinensis OX=74649 GN=RchiOBHm_Chr5g0067441 PE=4 SV=1	117.95	103.813	109.942	214.685	473.593	364.947
FvH4_7g02340	209.914	1.6875	0.388316	4.34569	1.39e-05	0.00282657	-	-	CPL4_ARATH	RNA polymerase II C-terminal domain phosphatase-like 4 OS=Arabidopsis thaliana OX=3702 GN=CPL4 PE=1 SV=1	AT5G58003.2	-	223.014	112.919	222.896	528.454	744.471	527.353
FvH4_6g15140	74.6505	1.68777	0.476412	3.54267	0.000396099	0.0326545	-	-	-	-	-	-	25.7706	60.1021	30.1211	202.056	104.456	67.2026
FvH4_2g23930	454.274	1.70481	0.340214	5.01099	5.42e-07	0.000214888	gi|470112765|ref|XP_004292601.1|	PREDICTED: Eid1-like F-box protein 3 [Fragaria vesca subsp. vesca]	EDL3_ARATH	Eid1-like F-box protein 3 OS=Arabidopsis thaliana OX=3702 GN=EDL3 PE=2 SV=1	AT3G63060.1	Uncharacterized protein OS=Rosa chinensis OX=74649 GN=RchiOBHm_Chr6g0291561 PE=4 SV=1	432.152	227.659	194.281	1056.91	876.369	847.499
FvH4_6g52050	438.053	1.71271	0.491422	3.4852	0.000491761	0.0356801	gi|470141340|ref|XP_004306392.1|	PREDICTED: uncharacterized protein LOC101309189 [Fragaria vesca subsp. vesca]	-	-	AT3G01660.1	-	13.8765	25.4979	25.6029	135.999	35.4088	42.935
FvH4_7g29480	228.165	1.72562	0.47857	3.60579	0.000311202	0.0275992	gi|764637601|ref|XP_011470365.1|	PREDICTED: low-temperature-induced 65 kDa protein isoform X1 [Fragaria vesca subsp. vesca]	-	-	-	-	116.959	74.6723	82.0799	282.684	306.286	315.479
FvH4_2g35410	316.918	1.75135	0.398736	4.39225	1.12e-05	0.00244691	gi|470109782|ref|XP_004291169.1|	PREDICTED: lachrymatory-factor synthase-like [Fragaria vesca subsp. vesca]	LFS_ALLCE	Lachrymatory-factor synthase OS=Allium cepa OX=4679 GN=LFS PE=1 SV=1	AT4G32870.1	Putative polyketide cyclase/dehydrase, START-like domain-containing protein OS=Rosa chinensis OX=74649 GN=RchiOBHm_Chr6g0306481 PE=4 SV=1	69.3823	20.034	64.0073	203.999	112.423	200.674
FvH4_2g29860	539.481	1.76594	0.351836	5.01921	5.19e-07	0.000213117	-	-	-	-	AT2G25625.1	Uncharacterized protein OS=Rosa chinensis OX=74649 GN=RchiOBHm_Chr6g0298931 PE=4 SV=1	69.3823	87.4212	85.8451	264.227	294.779	266.943
FvH4_1g05181	541.723	1.76761	0.259338	6.81588	9.37e-12	9.14e-09	gi|764505182|ref|XP_011458210.1|	PREDICTED: probable serine incorporator isoform X2 [Fragaria vesca subsp. vesca]	SERC3_HUMAN	Serine incorporator 3 OS=Homo sapiens OX=9606 GN=SERINC3 PE=2 SV=2	AT3G24460.2	Putative serine incorporator/TMS membrane protein OS=Rosa chinensis OX=74649 GN=RchiOBHm_Chr2g0090921 PE=4 SV=1	438.099	244.051	298.199	1027.77	1062.26	1245.11
FvH4_4g31450	658.542	1.77812	0.510557	3.4827	0.000496381	0.0357593	-	-	PKS1_ARATH	Protein PHYTOCHROME KINASE SUBSTRATE 1 OS=Arabidopsis thaliana OX=3702 GN=PKS1 PE=1 SV=2	AT2G02950.1	-	225.988	151.166	153.617	1393.02	265.566	161.473
FvH4_2g12570	5532.34	1.79035	0.264319	6.77345	1.26e-11	1.18e-08	gi|470108283|ref|XP_004290451.1|	PREDICTED: putative laccase-9 [Fragaria vesca subsp. vesca]	LAC9_ORYSJ	Putative laccase-9 OS=Oryza sativa subsp. japonica OX=39947 GN=LAC9 PE=3 SV=1	AT5G09360.1	Laccase OS=Rosa chinensis OX=74649 GN=RchiOBHm_Chr6g0273101 PE=3 SV=1	408.364	655.659	637.061	1264.79	2999.13	1622.2
FvH4_5g06210	2150.62	1.81728	0.361224	5.0309	4.88e-07	0.000204104	gi|1365976637|ref|XP_024187182.1|	glucan endo-1,3-beta-glucosidase, basic isoform-like [Rosa chinensis]	E13B_PRUPE	Glucan endo-1,3-beta-glucosidase, basic isoform OS=Prunus persica OX=3760 GN=GNS1 PE=3 SV=1	AT3G57270.1	-	19.8235	16.3915	16.5666	29.1427	88.5221	67.2026
FvH4_1g12582	5090.61	1.8347	0.364596	5.03214	4.85e-07	0.000204104	-	-	DHN1_HORVU	Dehydrin DHN1 OS=Hordeum vulgare OX=4513 GN=DHN1 PE=2 SV=1	AT1G20450.1	Putative dehydrin OS=Rosa chinensis OX=74649 GN=RchiOBHm_Chr2g0100551 PE=3 SV=1	2014.07	988.952	1421.71	6965.1	4838.62	3978.02
FvH4_2g18220	414.317	1.85835	0.423841	4.38456	1.16e-05	0.00249642	gi|470107663|ref|XP_004290163.1|	PREDICTED: putative glycine-rich cell wall structural protein 1 [Fragaria vesca subsp. vesca]	-	-	-	-	49.5588	9.10638	25.6029	128.228	102.686	72.8028
FvH4_1g19480	647.892	1.85923	0.369069	5.03763	4.71e-07	0.000204104	-	-	U91A1_ARATH	UDP-glycosyltransferase 91A1 OS=Arabidopsis thaliana OX=3702 GN=UGT91A1 PE=2 SV=1	AT2G22590.1	Glycosyltransferase OS=Rosa chinensis OX=74649 GN=RchiOBHm_Chr2g0110861 PE=3 SV=1	18.8323	8.19574	6.02422	30.1141	30.9827	55.0688
FvH4_6g10510	1808.18	1.87863	0.420217	4.47062	7.8e-06	0.00184454	-	-	WRK33_ARATH	Probable WRKY transcription factor 33 OS=Arabidopsis thaliana OX=3702 GN=WRKY33 PE=1 SV=2	AT2G38470.1	-	1344.03	1178.36	1138.58	9354.81	2716.74	1390.72
FvH4_7g14680	2054.67	1.88667	0.500627	3.7686	0.000164164	0.0171588	gi|470142111|ref|XP_004306762.1|	PREDICTED: dehydration-responsive protein RD22-like [Fragaria vesca subsp. vesca]	RD22_ARATH	BURP domain protein RD22 OS=Arabidopsis thaliana OX=3702 GN=RD22 PE=2 SV=1	AT5G25610.1	-	1920.9	1237.56	1594.16	12896.6	2838.9	1838.74
FvH4_5g39010	7702.61	1.95477	0.41336	4.72898	2.26e-06	0.000668751	gi|470129046|ref|XP_004300440.1|	PREDICTED: nitrate reductase [NADH]	NIA_CUCMA	Nitrate reductase [NADH] OS=Cucurbita maxima OX=3661 PE=2 SV=1	-	-	295.37	152.987	134.039	237.027	830.337	1187.25
FvH4_5g20290	383.597	1.96718	0.58626	3.35547	0.00079229	0.0477643	-	-	EXLB1_ARATH	Expansin-like B1 OS=Arabidopsis thaliana OX=3702 GN=EXLB1 PE=2 SV=2	AT4G17030.1	-	13.8765	12.7489	4.51816	25.257	42.4906	52.2687
FvH4_6g43720	218.03	1.96818	0.404457	4.86622	1.14e-06	0.000395963	gi|764512939|ref|XP_004289147.2|	PREDICTED: probable terpene synthase 9 [Fragaria vesca subsp. vesca]	TPS9_RICCO	Probable terpene synthase 9 OS=Ricinus communis OX=3988 GN=TPS9 PE=3 SV=1	AT3G25810.1	-	5.94705	16.3915	12.0484	62.1711	31.8679	42.0016
FvH4_5g03320	2010.7	1.98398	0.465536	4.26172	2.03e-05	0.00349227	-	-	Y1465_ARATH	Late embryogenesis abundant protein At1g64065 OS=Arabidopsis thaliana OX=3702 GN=At1g64065 PE=2 SV=1	AT1G64065.1	-	989.193	1161.97	831.342	8486.35	2279.44	1032.31
FvH4_6g37200	1002.49	1.99208	0.381349	5.22379	1.75e-07	8.92e-05	gi|470136084|ref|XP_004303831.1|	PREDICTED: glucan endo-1,3-beta-glucosidase, basic isoform-like [Fragaria vesca subsp. vesca]	E13B_PRUPE	Glucan endo-1,3-beta-glucosidase, basic isoform OS=Prunus persica OX=3760 GN=GNS1 PE=3 SV=1	AT3G57270.1	-	13.8765	10.9277	16.5666	36.9141	35.4088	93.3369
FvH4_6g45860	8975.9	2.02333	0.410277	4.93161	8.16e-07	0.00029376	-	-	COL2_ARATH	Zinc finger protein CONSTANS-LIKE 2 OS=Arabidopsis thaliana OX=3702 GN=COL2 PE=1 SV=1	-	-	1300.42	874.212	825.318	7635.39	2777.82	1780.87
FvH4_2g08040	126.745	2.03868	0.506002	4.029	5.6e-05	0.00763217	gi|658015215|ref|XP_008342939.1|	PREDICTED: beta-amyrin synthase-like [Malus domestica]	BAMS_BETPL	Beta-amyrin synthase OS=Betula platyphylla OX=78630 GN=OSCBPY PE=1 SV=1	AT1G78970.3	Beta-amyrin synthase OS=Prunus yedoensis var. nudiflora OX=2094558 GN=Pyn_10768 PE=4 SV=1	79.294	32.783	34.6392	266.17	214.223	120.405
FvH4_6g43580	673.2	2.04019	0.571427	3.57033	0.000356525	0.0304647	gi|470147655|ref|XP_004309403.1|	PREDICTED: B-box zinc finger protein 32-like [Fragaria vesca subsp. vesca]	MIP1A_ARATH	B-box domain protein 30 OS=Arabidopsis thaliana OX=3702 GN=MIP1A PE=1 SV=1	-	-	148.676	179.396	86.5981	1339.59	167.307	197.874
FvH4_4g03280	64.74	2.09992	0.56626	3.70839	0.00020858	0.0203008	-	-	-	-	-	-	25.7706	7.2851	19.5787	81.5995	68.162	75.6029
FvH4_3g16330	58.927	2.1005	0.621545	3.37948	0.000726225	0.0451011	gi|1358164105|gb|PRQ38582.1|	putative bifunctional inhibitor/plant lipid transfer protein/seed storage helical [Rosa chinensis]	-	-	-	Putative bifunctional inhibitor/plant lipid transfer protein/seed storage helical OS=Rosa chinensis OX=74649 GN=RchiOBHm_Chr4g0415591 PE=4 SV=1	67.3999	30.9617	12.0484	143.771	233.698	93.3369
FvH4_7g17280	765.625	2.10627	0.614955	3.42508	0.000614613	0.0401178	-	-	-	-	AT2G46640.2	-	1.98235	0	7.53027	0	26.5566	16.8006
FvH4_4g13940	113.586	2.12508	0.52399	4.05557	5e-05	0.00705396	-	-	-	-	-	-	13.8765	5.46383	21.0848	97.1423	53.1132	28.0011
FvH4_2g19310	1574.02	2.19613	0.387213	5.67163	1.41e-08	8.28e-06	gi|764529428|ref|XP_011458200.1|	PREDICTED: protein SULFUR DEFICIENCY-INDUCED 1 [Fragaria vesca subsp. vesca]	SDI1_ARATH	Protein SULFUR DEFICIENCY-INDUCED 1 OS=Arabidopsis thaliana OX=3702 GN=SDI1 PE=2 SV=1	AT5G48850.1	Putative tetratricopeptide-like helical domain-containing protein OS=Rosa chinensis OX=74649 GN=RchiOBHm_Chr6g0285121 PE=4 SV=1	55.5058	63.7446	67.7724	542.054	118.62	197.874
FvH4_2g36640	169.852	2.20292	0.569789	3.86619	0.000110548	0.0126257	-	-	-	-	-	Glycosyltransferase OS=Rosa chinensis OX=74649 GN=RchiOBHm_Chr6g0305151 PE=3 SV=1	1.98235	5.46383	3.01211	11.6571	14.1635	22.4009
FvH4_4g11390	89.3244	2.20836	0.447559	4.93422	8.05e-07	0.00029376	-	-	-	-	-	-	35.6823	42.8	25.6029	149.599	124.816	205.341
FvH4_3g04680	2026.52	2.24463	0.380819	5.89422	3.76e-09	2.59e-06	gi|470114731|ref|XP_004293563.1|	PREDICTED: polyphenol oxidase, chloroplastic-like [Fragaria vesca subsp. vesca]	PPO_PRUAR	Polyphenol oxidase latent form, chloroplastic OS=Prunus armeniaca OX=36596 GN=PPO PE=1 SV=1	-	Putative catechol oxidase OS=Rosa chinensis OX=74649 GN=RchiOBHm_Chr5g0007621 PE=4 SV=1	137.773	194.876	227.414	448.798	1164.07	1043.51
FvH4_1g19921	53.0313	2.32408	0.651427	3.56767	0.000360164	0.0306637	gi|1365960009|ref|XP_024179494.1|	toll/interleukin-1 receptor-like protein isoform X1 [Rosa chinensis]	TMVRN_NICGU	TMV resistance protein N OS=Nicotiana glutinosa OX=35889 GN=N PE=1 SV=1	AT1G72920.1	TMV resistance protein N (Fragment) OS=Mucuna pruriens OX=157652 GN=N PE=4 SV=1	11.8941	0	7.53027	33.0284	29.2123	34.5346
FvH4_4g33920	347.605	2.32697	0.684107	3.40147	0.000670252	0.0425274	gi|764579570|ref|XP_011463689.1|	PREDICTED: protein PLANT CADMIUM RESISTANCE 2-like [Fragaria vesca subsp. vesca]	-	-	-	-	1.98235	1.82128	6.02422	37.8855	7.08177	6.53358
FvH4_2g29030	89.0173	2.34139	0.54605	4.28786	1.8e-05	0.00322154	-	-	-	-	-	Putative EEIG1/EHBP1 domain-containing protein OS=Rosa chinensis OX=74649 GN=RchiOBHm_Chr6g0297901 PE=4 SV=1	5.94705	10.9277	10.5424	67.9996	47.8019	24.2676
FvH4_2g17620	54.4709	2.45189	0.696021	3.52273	0.000427134	0.0339	-	-	-	-	-	Putative EF-hand domain pair protein OS=Rosa chinensis OX=74649 GN=RchiOBHm_Chr6g0282601 PE=4 SV=1	13.8765	0	15.0605	65.0854	37.1793	56.9355
FvH4_3g36955	4575.86	2.47019	0.663352	3.72381	0.000196242	0.0193865	-	-	-	-	-	Putative oxidoreductase OS=Rosa chinensis OX=74649 GN=RchiOBHm_Chr4g0408661 PE=4 SV=1	19.8235	10.9277	25.6029	254.513	31.8679	27.0677
FvH4_7g29240	107.495	2.49146	0.601145	4.14452	3.41e-05	0.00521093	-	-	-	-	-	-	15.8588	14.5702	6.02422	139.885	37.1793	26.1343
FvH4_6g37950	23.0148	2.59362	0.736062	3.52364	0.000425657	0.0338976	-	-	-	-	-	-	7.9294	8.19574	5.27119	44.6855	56.6541	27.0677
FvH4_1g20090	310.623	2.6031	0.510356	5.10055	3.39e-07	0.000155473	gi|764518885|ref|XP_011468003.1|	PREDICTED: protein TRANSPARENT TESTA 12-like [Fragaria vesca subsp. vesca]	-	-	-	Protein DETOXIFICATION OS=Rosa chinensis OX=74649 GN=RchiOBHm_Chr2g0112071 PE=3 SV=1	43.6117	9.10638	16.5666	264.227	93.8334	59.7356
FvH4_6g37070	74.9425	2.6052	0.559945	4.6526	3.28e-06	0.000924616	gi|470136057|ref|XP_004303818.1|	PREDICTED: uncharacterized protein LOC101314483 [Fragaria vesca subsp. vesca]	-	-	-	-	55.5058	14.5702	7.53027	184.57	161.11	121.338
FvH4_3g36040	86978.9	2.63686	0.322204	8.18383	2.75e-16	8.05e-13	-	-	MT1_CICAR	Metallothionein-like protein 1 OS=Cicer arietinum OX=3827 PE=3 SV=1	-	Putative Metallothionein, family 15, plant OS=Rosa chinensis OX=74649 GN=RchiOBHm_Chr5g0064491 PE=4 SV=1	7907.6	4854.61	7348.79	64091.6	39021.4	21973.4
FvH4_2g02110	49.9397	2.68793	0.602221	4.46336	8.07e-06	0.00188906	-	-	-	-	-	Putative polyketide synthase, type III, thiolase OS=Rosa chinensis OX=74649 GN=RchiOBHm_Chr6g0245621 PE=3 SV=1	5.94705	0	15.0605	33.0284	72.5881	33.6013
FvH4_4g34620	1075.09	2.88262	0.378594	7.61401	2.66e-14	6.22e-11	-	-	PUB19_ARATH	U-box domain-containing protein 19 OS=Arabidopsis thaliana OX=3702 GN=PUB19 PE=2 SV=1	-	-	402.417	307.795	94.1284	2132.27	2195.35	1594.19
FvH4_6g20400	67.4789	2.96263	0.751945	3.93996	8.15e-05	0.0102035	-	-	-	-	-	-	7.9294	3.64255	0	29.1427	49.5724	7.46695
FvH4_3g37082	37.4082	2.98442	0.854943	3.49078	0.000481611	0.0356801	-	-	-	-	-	Uncharacterized protein OS=Rosa chinensis OX=74649 GN=RchiOBHm_Chr1g0320121 PE=4 SV=1	19.8235	20.034	10.5424	188.456	166.421	42.935
FvH4_3g04660	3768.94	2.99715	0.263498	11.3745	5.6e-30	6.56e-26	gi|470114658|ref|XP_004293528.1|	PREDICTED: polyphenol oxidase, chloroplastic-like [Fragaria vesca subsp. vesca]	PPO_MALDO	Polyphenol oxidase, chloroplastic OS=Malus domestica OX=3750 PE=2 SV=1	-	Polyphenol oxidase 1 OS=Fragaria pentaphylla OX=101014 GN=PPO1 PE=4 SV=1	123.897	132.953	196.54	1027.77	1615.53	985.637
FvH4_6g38150	165.75	3.1804	0.858212	3.70584	0.000210691	0.0203008	gi|1365966418|ref|XP_024182570.1|	xyloglucan endotransglucosylase/hydrolase 2-like [Rosa chinensis]	XTH16_ARATH	Probable xyloglucan endotransglucosylase/hydrolase protein 16 OS=Arabidopsis thaliana OX=3702 GN=XTH16 PE=2 SV=2	AT3G23730.1	-	7.9294	7.2851	3.01211	54.3997	86.7516	22.4009
FvH4_3g36030	34064.3	3.19317	0.428647	7.44943	9.37e-14	1.36e-10	-	-	MT2_ACTDE	Metallothionein-like protein type 2 OS=Actinidia deliciosa OX=3627 GN=pKIWI504 PE=2 SV=1	-	Putative Metallothionein, family 15, plant OS=Rosa chinensis OX=74649 GN=RchiOBHm_Chr5g0064481 PE=4 SV=1	2857.56	1964.25	2875.06	42731.9	20522.1	7144.01
FvH4_3g02481	156.12	3.20153	0.74557	4.29406	1.75e-05	0.00320894	gi|470114133|ref|XP_004293271.1|	PREDICTED: beta-glucosidase 47 [Fragaria vesca subsp. vesca]	-	-	-	Uncharacterized protein OS=Prunus persica OX=3760 GN=PRUPE_4G024400 PE=3 SV=1	8.92058	0	0	17.4856	36.2941	22.4009
FvH4_4g07571	36.902	3.21682	0.950027	3.38603	0.000709122	0.0442738	-	-	-	-	-	-	24.7794	0	3.01211	130.171	69.9324	55.0688
FvH4_3g36840	726.399	3.57367	1.04345	3.42485	0.000615141	0.0401178	-	-	ZIP2_ARATH	Zinc transporter 2 OS=Arabidopsis thaliana OX=3702 GN=ZIP2 PE=2 SV=1	AT5G59520.1	Putative zinc/iron permease OS=Rosa chinensis OX=74649 GN=RchiOBHm_Chr5g0065941 PE=4 SV=1	9.91175	0	0	50.514	38.9497	24.2676
FvH4_7g21150	47.3617	4.50613	1.17382	3.83885	0.000123612	0.013524	-	-	DSC1_ARATH	Disease resistance-like protein DSC1 OS=Arabidopsis thaliana OX=3702 GN=DSC1 PE=1 SV=1	AT4G12010.1	-	1.98235	0	0	23.3142	9.73743	7.46695
FvH4_7g31321	87.4879	4.6076	1.30889	3.52025	0.000431141	0.0341024	-	-	RGA3_SOLBU	Putative disease resistance protein RGA3 OS=Solanum bulbocastanum OX=147425 GN=RGA3 PE=2 SV=2	AT3G14470.2	-	0.991175	0.910638	0	24.2856	4.4261	14.9339
FvH4_1g02690	38.7141	4.70269	1.34036	3.50852	0.000450606	0.0348071	gi|470104806|ref|XP_004288785.1|	PREDICTED: trichome differentiation protein GL1-like [Fragaria vesca subsp. vesca]	MYB82_ARATH	Transcription factor MYB82 OS=Arabidopsis thaliana OX=3702 GN=MYB82 PE=1 SV=1	AT5G52600.1	Putative transcription factor MYB-HB-like family OS=Rosa chinensis OX=74649 GN=RchiOBHm_Chr2g0087781 PE=4 SV=1	0	0	1.50605	36.9141	5.31132	1.86674
FvH4_1g02700	828.713	4.72889	1.29694	3.64619	0.000266158	0.0241999	-	-	IAA29_ARATH	Auxin-responsive protein IAA29 OS=Arabidopsis thaliana OX=3702 GN=IAA29 PE=1 SV=2	AT4G32280.1	Auxin-responsive protein OS=Rosa chinensis OX=74649 GN=RchiOBHm_Chr2g0087791 PE=3 SV=1	0	0	0	0	8.85221	3.73348
FvH4_5g14950	2032.05	4.74139	1.25388	3.78138	0.000155961	0.0165227	-	-	GASA6_ARATH	Gibberellin-regulated protein 6 OS=Arabidopsis thaliana OX=3702 GN=GASA6 PE=3 SV=1	-	-	0	0	0	0	5.31132	7.46695
FvH4_4g02260	2795.02	4.93136	1.24833	3.95036	7.8e-05	0.00982279	gi|470104042|ref|XP_004288426.1|	PREDICTED: auxin-responsive protein IAA4 [Fragaria vesca subsp. vesca]	-	-	-	Auxin-responsive protein OS=Rosa chinensis OX=74649 GN=RchiOBHm_Chr4g0389611 PE=3 SV=1	0	0	0	0	8.85221	5.60021
FvH4_3g28600	98.0244	5.01177	1.23654	4.05308	5.05e-05	0.0070868	-	-	-	-	-	Putative carboxylesterase OS=Rosa chinensis OX=74649 GN=RchiOBHm_Chr5g0052531 PE=4 SV=1	1.98235	0	0	33.0284	24.7862	0
FvH4_4g05650	59.9332	5.11449	1.30573	3.91695	8.97e-05	0.0107674	gi|764641992|ref|XP_011470925.1|	PREDICTED: uncharacterized protein LOC105353448 [Fragaria vesca subsp. vesca]	-	-	-	Putative plant self-incompatibility S1 OS=Rosa chinensis OX=74649 GN=RchiOBHm_Chr4g0396831 PE=4 SV=1	0	0	0	7.77139	3.54088	5.60021
FvH4_1g16040	26.6332	5.17619	1.17884	4.39092	1.13e-05	0.00244691	gi|764621485|ref|XP_011468656.1|	PREDICTED: uncharacterized protein LOC105352734 [Fragaria vesca subsp. vesca]	-	-	-	Uncharacterized protein OS=Rosa chinensis OX=74649 GN=RchiOBHm_Chr6g0297171 PE=4 SV=1	3.9647	0	0	44.6855	33.6384	56.0021
FvH4_6g05780	52.7328	5.2846	1.34646	3.9248	8.68e-05	0.0105299	gi|470138509|ref|XP_004304998.1|	PREDICTED: cyclin-P3-1 [Fragaria vesca subsp. vesca]	CCP31_ORYSJ	Cyclin-P3-1 OS=Oryza sativa subsp. japonica OX=39947 GN=CYCP3-1 PE=3 SV=1	AT3G05327.1	-	0	0	0	11.6571	0	7.46695
FvH4_5g21980	846.694	5.3399	1.53105	3.48774	0.000487126	0.0356801	gi|470128637|ref|XP_004300243.1|	PREDICTED: putative DNA-binding protein ESCAROLA [Fragaria vesca subsp. vesca]	AHL23_ARATH	AT-hook motif nuclear-localized protein 23 OS=Arabidopsis thaliana OX=3702 GN=AHL23 PE=1 SV=1	AT4G17800.1	-	0	0	0	0	19.4749	0
FvH4_2g21640	1202.7	5.43462	1.38426	3.92602	8.64e-05	0.0105299	-	-	DRPE_CRAPL	Desiccation-related protein PCC13-62 OS=Craterostigma plantagineum OX=4153 PE=2 SV=1	-	Uncharacterized protein OS=Rosa chinensis OX=74649 GN=RchiOBHm_Chr6g0252921 PE=4 SV=1	0	0	0	17.4856	0	3.73348
FvH4_4g14411	45.9617	5.47198	1.10827	4.93743	7.92e-07	0.00029376	gi|1358143034|gb|PRQ17514.1|	hypothetical protein RchiOBHm_Chr7g0195811 [Rosa chinensis]	-	-	-	Uncharacterized protein OS=Rosa chinensis OX=74649 GN=RchiOBHm_Chr7g0195811 PE=4 SV=1	7.9294	0	0	209.827	77.8994	50.4019
FvH4_4g28000	91.1065	5.4861	1.38816	3.95207	7.75e-05	0.00980522	gi|764574078|ref|XP_011462938.1|	PREDICTED: uncharacterized protein LOC105351119 isoform X1 [Fragaria vesca subsp. vesca]	-	-	AT3G52680.2	-	0	0	0	0	15.934	5.60021
FvH4_2g15861	13.726	5.49564	1.59172	3.45265	0.000555115	0.0381675	gi|1358141687|gb|PRQ16167.1|	putative ribonuclease H-like domain-containing protein [Rosa chinensis]	RNHX1_ARATH	Putative ribonuclease H protein At1g65750 OS=Arabidopsis thaliana OX=3702 GN=At1g65750 PE=3 SV=1	AT5G42905.1	Putative ribonuclease H-like domain-containing protein OS=Rosa chinensis OX=74649 GN=RchiOBHm_Chr7g0181271 PE=4 SV=1	0	0	0	0	10.6226	11.2004
FvH4_7g30780	582.817	5.50642	1.60543	3.42988	0.000603856	0.0399381	gi|470144783|ref|XP_004308027.1|	PREDICTED: acidic endochitinase-like [Fragaria vesca subsp. vesca]	CHIT3_VITVI	Acidic endochitinase OS=Vitis vinifera OX=29760 GN=CHIT3 PE=2 SV=1	AT5G24090.1	-	0	0	0	0	7.08177	14.9339
FvH4_6g44621	21.3681	5.54643	1.23476	4.4919	7.06e-06	0.00173969	-	-	-	-	-	-	0	3.64255	0	42.7426	62.8507	61.6023
FvH4_3g09321	19.6674	5.64946	1.52208	3.71167	0.000205897	0.0201702	-	-	-	-	-	-	0	0	0	15.5428	8.85221	0
FvH4_2g36371	119.591	5.87163	1.32124	4.44402	8.83e-06	0.00203188	gi|470110056|ref|XP_004291303.1|	PREDICTED: calmodulin-like protein 7 [Fragaria vesca subsp. vesca]	CML42_ARATH	Calcium-binding protein CML42 OS=Arabidopsis thaliana OX=3702 GN=CML42 PE=1 SV=1	AT4G20780.1	Uncharacterized protein OS=Prunus persica OX=3760 GN=PRUPE_1G455200 PE=4 SV=1	0	0	0	19.4285	1.77044	7.46695
FvH4_3g14160	45.6779	5.89921	1.67238	3.52744	0.000419599	0.0335292	-	-	-	-	-	Uncharacterized protein OS=Prunus persica OX=3760 GN=PRUPE_5G163500 PE=3 SV=1	0	0	0	27.1998	0	1.86674
FvH4_6g50010	78.4583	6.2109	1.59417	3.896	9.78e-05	0.0115552	-	-	-	-	-	-	0	0	0	13.5999	0	22.4009
FvH4_6g14450	59.6251	6.28104	1.39052	4.51703	6.27e-06	0.00161351	gi|470138959|ref|XP_004305219.1|	PREDICTED: licodione synthase-like [Fragaria vesca subsp. vesca]	C93B1_GLYEC	Licodione synthase OS=Glycyrrhiza echinata OX=46348 GN=CYP93B1 PE=1 SV=2	AT5G06900.1	-	0	0	0	15.5428	1.77044	20.5341
FvH4_2g03450	59.5494	6.31836	1.31156	4.81744	1.45e-06	0.000493399	-	-	-	-	AT3G19660.1	Uncharacterized protein OS=Prunus persica OX=3760 GN=PRUPE_8G149100 PE=4 SV=1	0	0	0	9.71423	17.7044	11.2004
FvH4_2g06740	29.2758	6.35137	1.50333	4.22485	2.39e-05	0.00399853	gi|764548057|ref|XP_011459752.1|	PREDICTED: uncharacterized protein LOC105350078 [Fragaria vesca subsp. vesca]	-	-	-	Uncharacterized protein OS=Rosa chinensis OX=74649 GN=RchiOBHm_Chr6g0258931 PE=4 SV=1	0	0	0	27.1998	10.6226	1.86674
FvH4_4g20641	7.83561	6.39504	1.78486	3.58294	0.000339742	0.0292441	-	-	-	-	-	-	0	0	0	13.5999	14.1635	13.0672
FvH4_7g20450	13.948	6.48405	1.62104	3.99994	6.34e-05	0.00838083	gi|1365952178|ref|XP_024176762.1|	two-component response regulator-like APRR9 [Rosa chinensis]	-	-	-	-	0	0	0	21.3713	5.31132	16.8006
FvH4_1g06140	48.4634	6.86586	1.0647	6.44861	1.13e-10	9.79e-08	-	-	-	-	-	-	3.9647	0	0	237.027	96.4891	95.2036
FvH4_2g22660	22.0864	6.91794	1.65289	4.18537	2.85e-05	0.00459701	-	-	-	-	-	-	0	0	0	13.5999	30.0975	14.9339
FvH4_6g44640	14.127	7.5779	2.01588	3.75911	0.000170522	0.0175878	-	-	-	-	-	-	0	0	0	0	29.2123	63.4691
FvH4_6g15360	66.6466	8.03931	1.35136	5.94904	2.7e-09	1.91e-06	gi|764616807|ref|XP_011468082.1|	PREDICTED: uncharacterized protein LOC105352506 [Fragaria vesca subsp. vesca]	-	-	-	-	0	0	0	41.7712	52.228	33.6013
FvH4_4g18920	39.8385	8.58269	1.50699	5.69526	1.23e-08	7.4e-06	-	-	-	-	-	-	0	0	0	13.5999	92.063	80.2697
FvH4_4g07011	21.7859	9.34233	1.96148	4.76289	1.91e-06	0.000595755	-	-	-	-	-	-	0	0	0	163.199	58.4246	93.3369
FvH4_5g15721	71.1667	9.86064	1.31032	7.52537	5.26e-14	1.03e-10	-	-	-	-	-	-	0	0	0	236.056	58.4246	156.806
FvH4_4g33840	162.788	10.2627	1.23336	8.32086	8.73e-17	3.41e-13	gi|764513921|ref|XP_011463959.1|	PREDICTED: uncharacterized protein LOC105351439 [Fragaria vesca subsp. vesca]	-	-	-	-	0	0	0	133.085	208.912	253.876
FvH4_3g06660	416.66	10.3288	1.05381	9.80142	1.11e-22	6.5e-19	gi|764526000|ref|XP_011457939.1|	PREDICTED: protein MCM10 homolog [Fragaria vesca subsp. vesca]	MCM10_MOUSE	Protein MCM10 homolog OS=Mus musculus OX=10090 GN=Mcm10 PE=1 SV=1	AT2G20980.1	Putative Zinc finger, Mcm10/DnaG-type OS=Rosa chinensis OX=74649 GN=RchiOBHm_Chr6g0251921 PE=4 SV=1	0	0	1.50605	850.967	775.453	610.423
FvH4_6g43142	92.9394	10.7608	1.23169	8.73668	2.4e-18	1.12e-14	-	-	POLX_TOBAC	Retrovirus-related Pol polyprotein from transposon TNT 1-94 OS=Nicotiana tabacum OX=4097 PE=2 SV=1	-	-	0	0	0	215.656	313.368	312.679

## Sheet: Supplementary Table S3
Supplementary Table S3. List of up- and down-regulated genes after 5-day picloram treatment in H4.
Geneid	baseMean	log2FoldChange	lfcSE	stat	pvalue	padj	Match(Nr)	Description(Nr)	Match	Description(Ab)	Match(Ab)	Description（trembl）	H4_CK_1.nor	H4_CK_2.nor	H4_CK_3.nor	H4_Pi_1.nor	H4_Pi_2.nor	H4_Pi_3.nor
FvH4_1g00130	563.245	-1.51412	0.248616	-6.0902	1.12766e-09	2.36577e-08	-	-	MRL7L_ARATH	Thioredoxin-like fold domain-containing protein MRL7L, chloroplastic OS=Arabidopsis thaliana OX=3702 GN=MRL7L PE=2 SV=1	AT2G31840.2	Uncharacterized protein OS=Rosa chinensis OX=74649 GN=RchiOBHm_Chr2g0084441 PE=4 SV=1	792.57	827.547	920.324	312.303	288.149	288.963
FvH4_1g00160	1443.74	-1.26641	0.248716	-5.09178	3.54718e-07	4.84822e-06	-	-	-	-	AT2G43945.1	Uncharacterized protein OS=Rosa chinensis OX=74649 GN=RchiOBHm_Chr2g0084451 PE=4 SV=1	1991.04	1698.03	2110.27	760.062	880.338	770.567
FvH4_1g00240	1985.81	-1.44844	0.266792	-5.42909	5.66432e-08	8.94863e-07	-	-	-	-	-	Putative methyl halide transferase OS=Rosa chinensis OX=74649 GN=RchiOBHm_Chr2g0084541 PE=4 SV=1	2055.13	1746.83	2484.16	651.885	912.119	739.826
FvH4_1g00300	53.7518	-2.87276	0.879498	-3.26636	0.0010894	0.00617582	-	-	-	-	-	Putative F-box domain-containing protein OS=Rosa chinensis OX=74649 GN=RchiOBHm_Chr6g0275741 PE=4 SV=1	114.292	148.334	86.2804	24.4575	16.9499	6.14814
FvH4_1g00343	3208.87	-2.00529	0.281676	-7.11911	1.08623e-12	3.60735e-11	-	-	-	-	-	Putative oxidoreductase OS=Rosa chinensis OX=74649 GN=RchiOBHm_Chr2g0084731 PE=4 SV=1	3295.25	2950.09	4250.21	928.443	851.735	834.098
FvH4_1g00345	1046.94	1.34662	0.382128	3.524	0.000425087	0.00277308	-	-	-	-	-	Putative oxidoreductase OS=Rosa chinensis OX=74649 GN=RchiOBHm_Chr2g0084741 PE=4 SV=1	409.103	767.042	887.07	2135.32	1721.48	1391.53
FvH4_1g00500	4290	-3.62106	0.283868	-12.7561	2.88178e-37	1.77556e-34	gi|470101389|ref|XP_004287155.1|	PREDICTED: uncharacterized protein LOC101296797 [Fragaria vesca subsp. vesca]	-	-	AT1G21500.1	Uncharacterized protein OS=Rosa chinensis OX=74649 GN=RchiOBHm_Chr2g0085131 PE=4 SV=1	5061.98	5368.32	7274.52	389.438	583.714	466.234
FvH4_1g00540	5548.33	-2.00211	0.242879	-8.24325	1.67589e-16	9.06181e-15	gi|470101379|ref|XP_004287150.1|	PREDICTED: uncharacterized protein LOC101295445 [Fragaria vesca subsp. vesca]	CAS_ARATH	Calcium sensing receptor, chloroplastic OS=Arabidopsis thaliana OX=3702 GN=CAS PE=1 SV=1	AT3G59780.1	Putative Rhodanese-like domain-containing protein OS=Rosa chinensis OX=74649 GN=RchiOBHm_Chr2g0085171 PE=4 SV=1	7542.23	7223.47	8555.24	1756.23	2059.42	2006.34
FvH4_1g00650	676.703	-1.12337	0.232386	-4.83408	1.33765e-06	1.6244e-05	gi|764506149|ref|XP_011463742.1|	PREDICTED: uncharacterized protein LOC101293042 [Fragaria vesca subsp. vesca]	-	-	-	Putative FAD dependent protein OS=Rosa chinensis OX=74649 GN=RchiOBHm_Chr2g0085271 PE=4 SV=1	831.024	830.474	860.108	383.794	411.036	362.74
FvH4_1g00670	2019.31	-2.83117	0.508122	-5.57182	2.52087e-08	4.25531e-07	gi|470101367|ref|XP_004287144.1|	PREDICTED: cellulose synthase A catalytic subunit 7 [UDP-forming]	-	-	-	Cellulose synthase OS=Rosa chinensis OX=74649 GN=RchiOBHm_Chr2g0085301 PE=3 SV=1	237.13	207.863	139.307	32.9235	27.5437	21.5185
FvH4_1g00820	225.731	-1.41576	0.34701	-4.0799	4.50553e-05	0.000384011	gi|1334277660|gb|PNS93760.1|	hypothetical protein POPTR_018G105700v3 [Populus trichocarpa]	SCP24_ARATH	Serine carboxypeptidase 24 OS=Arabidopsis thaliana OX=3702 GN=SCPL24 PE=1 SV=1	AT4G30610.1	Uncharacterized protein OS=Populus trichocarpa OX=3694 GN=POPTR_018G105700v3 PE=3 SV=1	284.129	339.606	294.791	75.2537	156.787	112.716
FvH4_1g01030	4550.89	-1.62215	0.175241	-9.25664	2.10969e-20	1.82941e-18	-	-	FAD6C_BRANA	Omega-6 fatty acid desaturase, chloroplastic OS=Brassica napus OX=3708 PE=1 SV=1	AT4G30950.1	Putative acyl-CoA (9+3)-desaturase OS=Rosa chinensis OX=74649 GN=RchiOBHm_Chr2g0085771 PE=4 SV=1	6279.68	5991.91	7982.73	2129.68	2099.67	2350.64
FvH4_1g01130	7898.89	-1.12544	0.191382	-5.88056	4.08871e-09	7.90496e-08	-	-	-	-	-	Putative glyceraldehyde-3-phosphate dehydrogenase (NADP(+)) OS=Rosa chinensis OX=74649 GN=RchiOBHm_Chr2g0085921 PE=3 SV=1	10036.4	9036.65	11487.9	5220.73	3601.86	5184.93
FvH4_1g01190	294.319	-3.62368	0.634677	-5.70949	1.13312e-08	2.03294e-07	-	-	-	-	-	Putative metallo-dependent phosphatase OS=Rosa chinensis OX=74649 GN=RchiOBHm_Chr2g0085991 PE=4 SV=1	117.497	192.248	280.411	13.1694	32.8405	2.04938
FvH4_1g01382	80.3582	5.20338	1.05832	4.91665	8.80392e-07	1.11179e-05	gi|470101512|ref|XP_004287215.1|	PREDICTED: chitotriosidase-1-like [Fragaria vesca subsp. vesca]	CHIC_ARATH	Class V chitinase OS=Arabidopsis thaliana OX=3702 GN=ChiC PE=1 SV=1	AT4G19810.2	Putative glycoside hydrolase family 18, catalytic domain, glycoside hydrolase, catalytic OS=Rosa chinensis OX=74649 GN=RchiOBHm_Chr2g0086161 PE=3 SV=1	14.9542	2.92764	6.29128	660.351	207.637	18.4444
FvH4_1g01383	22.4086	3.16442	0.772948	4.09396	4.24074e-05	0.000363298	gi|764505687|ref|XP_004288700.2|	PREDICTED: chitotriosidase-1-like [Fragaria vesca subsp. vesca]	CHIC_ARATH	Class V chitinase OS=Arabidopsis thaliana OX=3702 GN=ChiC PE=1 SV=1	AT4G19810.2	Putative glycoside hydrolase family 18, catalytic domain, glycoside hydrolase superfamily OS=Rosa chinensis OX=74649 GN=RchiOBHm_Chr2g0086281 PE=3 SV=1	3.20446	5.85528	9.8863	79.0164	33.8999	58.4073
FvH4_1g01390	58.4106	3.28751	0.861991	3.81386	0.000136814	0.00102701	gi|764505678|ref|XP_004288701.2|	PREDICTED: cysteine-rich receptor-like protein kinase 7 isoform X1 [Fragaria vesca subsp. vesca]	CRK7_ARATH	Cysteine-rich receptor-like protein kinase 7 OS=Arabidopsis thaliana OX=3702 GN=CRK7 PE=2 SV=1	AT4G23150.1	Uncharacterized protein OS=Rosa chinensis OX=74649 GN=RchiOBHm_Chr2g0086211 PE=3 SV=1	12.8178	15.6141	6.29128	161.795	130.303	46.1111
FvH4_1g01420	163.229	1.66087	0.310647	5.34649	8.96773e-08	1.36339e-06	-	-	CRK7_ARATH	Cysteine-rich receptor-like protein kinase 7 OS=Arabidopsis thaliana OX=3702 GN=CRK7 PE=2 SV=1	AT4G23150.1	Uncharacterized protein OS=Rosa chinensis OX=74649 GN=RchiOBHm_Chr2g0086191 PE=3 SV=1	133.519	118.082	91.6729	388.497	302.98	392.456
FvH4_1g01450	669.225	-1.10177	0.304106	-3.62297	0.000291242	0.00198719	-	-	PMA8_ARATH	ATPase 8, plasma membrane-type OS=Arabidopsis thaliana OX=3702 GN=AHA8 PE=3 SV=1	AT3G42640.1	Plasma membrane ATPase OS=Rosa chinensis OX=74649 GN=RchiOBHm_Chr2g0086371 PE=3 SV=1	676.141	702.634	578.798	261.507	380.314	270.518
FvH4_1g01710	664.354	-1.36896	0.257054	-5.32559	1.00626e-07	1.5141e-06	-	-	-	-	-	Peptidyl-prolyl cis-trans isomerase OS=Rosa chinensis OX=74649 GN=RchiOBHm_Chr2g0086651 PE=3 SV=1	873.75	768.994	796.296	306.659	322.049	315.605
FvH4_1g01772	8723.25	-2.07082	0.779624	-2.65618	0.00790322	0.0316708	-	-	-	-	-	-	7640.5	7034.15	10591.8	1017.81	3630.47	1365.91
FvH4_1g01830	13.0585	5.31652	2.09704	2.53525	0.0112367	0.0423308	gi|764506957|ref|XP_004288758.2|	PREDICTED: proline-rich receptor-like protein kinase PERK2 [Fragaria vesca subsp. vesca]	-	-	-	-	1.06815	0	0	15.0507	6.35623	20.4938
FvH4_1g01840	1152.2	2.25062	0.297965	7.55331	4.24332e-14	1.70703e-12	gi|470104751|ref|XP_004288759.1|	PREDICTED: uncharacterized protein LOC101307251 [Fragaria vesca subsp. vesca]	-	-	-	Uncharacterized protein OS=Rosa chinensis OX=74649 GN=RchiOBHm_Chr2g0086811 PE=4 SV=1	991.247	720.2	986.832	3676.14	4188.76	4975.9
FvH4_1g01870	759.836	-2.27549	0.309821	-7.34451	2.0651e-13	7.63825e-12	gi|470101558|ref|XP_004287237.1|	PREDICTED: uncharacterized protein LOC101296995 [Fragaria vesca subsp. vesca]	-	-	-	Uncharacterized protein OS=Rosa chinensis OX=74649 GN=RchiOBHm_Chr2g0086841 PE=4 SV=1	1138.65	1036.39	1542.26	267.151	203.399	297.16
FvH4_1g01890	30.2265	-8.26377	1.41802	-5.82769	5.62012e-09	1.0603e-07	gi|470101562|ref|XP_004287239.1|	PREDICTED: uncharacterized methyltransferase At2g41040, chloroplastic-like [Fragaria vesca subsp. vesca]	Y2104_ARATH	Uncharacterized methyltransferase At2g41040, chloroplastic OS=Arabidopsis thaliana OX=3702 GN=At2g41040 PE=1 SV=1	AT2G41040.1	Putative demethylmenaquinone methyltransferase OS=Rosa chinensis OX=74649 GN=RchiOBHm_Chr2g0086891 PE=4 SV=1	103.611	22.4453	44.9377	0	0	0
FvH4_1g01900	127.951	3.80683	1.00796	3.77675	0.000158886	0.00116944	gi|470101566|ref|XP_004287241.1|	PREDICTED: uncharacterized protein LOC101298159 [Fragaria vesca subsp. vesca]	-	-	AT2G12646.2	Putative transcription repressor PLATZ family OS=Rosa chinensis OX=74649 GN=RchiOBHm_Chr2g0086911 PE=4 SV=1	64.0892	44.8905	32.3552	428.005	675.879	873.036
FvH4_1g01970	1055.31	-1.74663	0.232996	-7.49637	6.5611e-14	2.58177e-12	gi|470101572|ref|XP_004287244.1|	PREDICTED: uncharacterized protein LOC101299028 [Fragaria vesca subsp. vesca]	-	-	AT2G12462.1	Putative sterile alpha motif/pointed domain-containing protein OS=Rosa chinensis OX=74649 GN=RchiOBHm_Chr2g0087001 PE=4 SV=1	858.796	1188.62	1137.82	314.184	309.337	325.851
FvH4_1g02100	604.028	1.88938	0.287893	6.56279	5.28085e-11	1.36633e-09	gi|764507085|ref|XP_011457618.1|	PREDICTED: heparanase-like protein 3 [Fragaria vesca subsp. vesca]	HPSE3_ARATH	Heparanase-like protein 3 OS=Arabidopsis thaliana OX=3702 GN=At5g34940 PE=2 SV=2	AT5G34940.2	Putative glycosidase OS=Rosa chinensis OX=74649 GN=RchiOBHm_Chr2g0087151 PE=4 SV=1	196.54	293.74	218.397	637.775	836.904	1151.75
FvH4_1g02111	359.997	1.8124	0.421132	4.30365	1.68006e-05	0.000161276	gi|764507088|ref|XP_004288768.2|	PREDICTED: leucoanthocyanidin dioxygenase-like [Fragaria vesca subsp. vesca]	DIOX3_PAPSO	Codeine O-demethylase OS=Papaver somniferum OX=3469 GN=CODM PE=1 SV=1	-	Putative codeine 3-O-demethylase OS=Rosa chinensis OX=74649 GN=RchiOBHm_Chr2g0087171 PE=3 SV=1	299.083	390.352	276.816	1119.4	1329.51	944.764
FvH4_1g02160	24.5735	3.9442	1.07629	3.66464	0.000247691	0.0017239	gi|764507097|ref|XP_004288772.2|	PREDICTED: protein SRG1-like [Fragaria vesca subsp. vesca]	-	-	-	Putative codeine 3-O-demethylase OS=Rosa chinensis OX=74649 GN=RchiOBHm_Chr2g0087261 PE=3 SV=1	8.54523	3.90352	0.898754	112.881	27.5437	62.5061
FvH4_1g02190	4967.21	1.65685	0.21335	7.76586	8.10943e-15	3.56891e-13	gi|470101604|ref|XP_004287260.1|	PREDICTED: LOW QUALITY PROTEIN: pyrophosphate-energized vacuolar membrane proton pump-like [Fragaria vesca subsp. vesca]	-	-	-	Putative inorganic diphosphatase OS=Rosa chinensis OX=74649 GN=RchiOBHm_Chr2g0087281 PE=3 SV=1	1623.59	1561.41	1482.94	5444.61	3408	5865.33
FvH4_1g02270	445.079	1.03878	0.305971	3.39502	0.000686224	0.00415372	gi|470101612|ref|XP_004287264.1|	PREDICTED: uncharacterized protein LOC101304996 [Fragaria vesca subsp. vesca]	-	-	-	Uncharacterized protein OS=Rosa chinensis OX=74649 GN=RchiOBHm_Chr6g0258741 PE=4 SV=1	320.446	199.08	292.994	577.572	533.923	557.431
FvH4_1g02520	25.22	4.70885	1.39714	3.37035	0.000750729	0.00447931	-	-	GLYT4_ARATH	Probable glycosyltransferase At5g11130 OS=Arabidopsis thaliana OX=3702 GN=At5g11130/At5g11120 PE=3 SV=2	AT5G11130.1	Putative xylogalacturonan beta-1,3-xylosyltransferase OS=Rosa chinensis OX=74649 GN=RchiOBHm_Chr2g0087551 PE=4 SV=1	0	0	0	3.76269	4.23749	6.14814
FvH4_1g02560	96.9195	-1.83054	0.530618	-3.44982	0.000560962	0.00350047	-	-	-	-	-	-	168.768	163.948	124.028	31.9828	36.0186	60.4567
FvH4_1g02561	12.1435	-6.27668	2.03335	-3.08686	0.00202283	0.0104061	-	-	-	-	-	-	12.8178	11.7106	59.3178	0	0	1.02469
FvH4_1g02570	45442.2	-2.25897	0.357584	-6.31731	2.66162e-10	6.15168e-09	-	-	-	-	-	Uncharacterized protein OS=Aquilegia coerulea OX=218851 GN=AQUCO_02000073v1 PE=4 SV=1	74041.2	71710.6	83129.4	12309.6	10014.2	25494.3
FvH4_1g02690	38.7141	-2.36411	0.856057	-2.76163	0.00575136	0.0244564	gi|470104806|ref|XP_004288785.1|	PREDICTED: trichome differentiation protein GL1-like [Fragaria vesca subsp. vesca]	MYB82_ARATH	Transcription factor MYB82 OS=Arabidopsis thaliana OX=3702 GN=MYB82 PE=1 SV=1	AT5G52600.1	Putative transcription factor MYB-HB-like family OS=Rosa chinensis OX=74649 GN=RchiOBHm_Chr2g0087781 PE=4 SV=1	61.9529	91.7328	55.7228	11.2881	23.3062	6.14814
FvH4_1g02700	828.713	4.22755	0.383944	11.0108	3.38817e-28	7.27774e-26	-	-	IAA29_ARATH	Auxin-responsive protein IAA29 OS=Arabidopsis thaliana OX=3702 GN=IAA29 PE=1 SV=2	AT4G32280.1	Auxin-responsive protein OS=Rosa chinensis OX=74649 GN=RchiOBHm_Chr2g0087791 PE=3 SV=1	245.675	195.176	224.689	4308.27	4178.16	3979.9
FvH4_1g02760	300.188	1.76095	0.368556	4.77796	1.77079e-06	2.09709e-05	-	-	CAP1_ARATH	Probable clathrin assembly protein At4g32285 OS=Arabidopsis thaliana OX=3702 GN=At4g32285 PE=1 SV=2	AT4G32285.2	Putative ANTH domain-containing protein OS=Rosa chinensis OX=74649 GN=RchiOBHm_Chr2g0087871 PE=4 SV=1	138.86	148.334	222.891	671.639	527.567	530.789
FvH4_1g02880	219.101	3.71865	0.429641	8.65526	4.91794e-18	3.172e-16	-	-	STEL_TOXVR	Stellacyanin OS=Toxicodendron vernicifluum OX=4013 PE=1 SV=1	AT5G20230.1	Putative cupredoxin OS=Rosa chinensis OX=74649 GN=RchiOBHm_Chr2g0087991 PE=4 SV=1	79.0434	60.5046	61.1153	921.858	1201.33	516.444
FvH4_1g02890	525.705	2.23739	0.248108	9.0178	1.91913e-19	1.51799e-17	-	-	BCB1_ARATH	Blue copper protein OS=Arabidopsis thaliana OX=3702 GN=BCB PE=2 SV=2	AT5G20230.1	Putative Blue (Type 1) copper binding protein OS=Rosa chinensis OX=74649 GN=RchiOBHm_Chr2g0088011 PE=4 SV=1	314.037	355.221	231.879	1708.26	1349.64	1188.64
FvH4_1g02900	122.565	3.21494	0.688854	4.66709	3.05495e-06	3.46875e-05	-	-	ENL1_ARATH	Early nodulin-like protein 1 OS=Arabidopsis thaliana OX=3702 GN=At2g25060 PE=2 SV=2	AT2G25060.1	Uncharacterized protein OS=Prunus persica OX=3760 GN=PRUPE_ppa009089mg PE=4 SV=1	57.6803	78.0704	39.5452	978.298	466.124	182.395
FvH4_1g03010	2966.73	-2.70571	0.285156	-9.48853	2.34318e-21	2.32462e-19	-	-	-	-	-	Uncharacterized protein OS=Rosa chinensis OX=74649 GN=RchiOBHm_Chr2g0088141 PE=4 SV=1	4422.16	3718.1	5310.74	611.436	741.56	709.086
FvH4_1g03080	725.398	2.08426	0.280647	7.42662	1.11408e-13	4.28308e-12	-	-	-	-	-	Putative tetratricopeptide-like helical domain-containing protein OS=Rosa chinensis OX=74649 GN=RchiOBHm_Chr2g0088211 PE=4 SV=1	337.537	366.931	433.2	1619.84	1843.31	1362.84
FvH4_1g03200	1038.4	1.82235	0.371433	4.90627	9.2825e-07	1.16657e-05	gi|470101720|ref|XP_004287317.1|	PREDICTED: SPX domain-containing protein 1-like [Fragaria vesca subsp. vesca]	SPX1_ARATH	SPX domain-containing protein 1 OS=Arabidopsis thaliana OX=3702 GN=SPX1 PE=1 SV=2	AT5G20150.1	Putative SPX domain-containing protein OS=Rosa chinensis OX=74649 GN=RchiOBHm_Chr2g0088351 PE=4 SV=1	666.528	368.883	814.271	2504.07	2494.82	1543.18
FvH4_1g03202	174.03	-1.53497	0.494586	-3.10354	0.00191217	0.00992016	gi|470101722|ref|XP_004287318.1|	PREDICTED: peroxidase 25 [Fragaria vesca subsp. vesca]	-	-	-	Peroxidase OS=Rosa chinensis OX=74649 GN=RchiOBHm_Chr2g0088361 PE=3 SV=1	217.903	400.111	204.916	67.7283	99.5809	116.815
FvH4_1g03260	9097.95	-2.22114	0.235301	-9.43955	3.74397e-21	3.6073e-19	gi|470101726|ref|XP_004287320.1|	PREDICTED: uncharacterized protein LOC101296704 [Fragaria vesca subsp. vesca]	-	-	AT3G47650.1	Putative Heat shock protein DnaJ, cysteine-rich OS=Rosa chinensis OX=74649 GN=RchiOBHm_Chr2g0088401 PE=4 SV=1	10952.8	10305.3	13391.4	2463.62	2635.72	2332.19
FvH4_1g03270	1443.09	-1.03931	0.266667	-3.89739	9.72343e-05	0.000759608	gi|470101728|ref|XP_004287321.1|	PREDICTED: uncharacterized protein LOC101296996 [Fragaria vesca subsp. vesca]	-	-	-	Uncharacterized protein OS=Rosa chinensis OX=74649 GN=RchiOBHm_Chr2g0088411 PE=4 SV=1	1483.67	1678.51	1801.1	755.359	937.544	722.407
FvH4_1g03330	69.3031	2.1883	0.704055	3.10813	0.00188274	0.00978264	gi|764507689|ref|XP_011458157.1|	PREDICTED: probable receptor-like protein kinase At5g39020 [Fragaria vesca subsp. vesca]	LRK10_WHEAT	Rust resistance kinase Lr10 OS=Triticum aestivum OX=4565 GN=LRK10 PE=2 SV=1	AT5G38280.2	Putative glycerophosphodiester phosphodiesterase, protein kinase RLK-Pelle-LRK10L-2 family OS=Rosa chinensis OX=74649 GN=RchiOBHm_Chr1g0333441 PE=4 SV=1	32.0446	23.4211	3.59502	114.762	67.7998	85.0493
FvH4_1g03331	424.831	1.54223	0.293452	5.25549	1.47629e-07	2.16434e-06	gi|470101741|ref|XP_004287327.1|	PREDICTED: glycerophosphodiester phosphodiesterase protein kinase domain-containing GDPDL2-like [Fragaria vesca subsp. vesca]	LRK10_WHEAT	Rust resistance kinase Lr10 OS=Triticum aestivum OX=4565 GN=LRK10 PE=2 SV=1	AT1G66920.2	Putative glycerophosphodiester phosphodiesterase, protein kinase RLK-Pelle-LRK10L-2 family OS=Rosa chinensis OX=74649 GN=RchiOBHm_Chr1g0328351 PE=4 SV=1	271.311	288.861	222.891	874.824	656.81	748.024
FvH4_1g03360	4962.07	1.05971	0.244397	4.33604	1.45075e-05	0.000141645	gi|470101745|ref|XP_004287329.1|	PREDICTED: probable sugar phosphate/phosphate translocator At2g25520 [Fragaria vesca subsp. vesca]	PT225_ARATH	Probable sugar phosphate/phosphate translocator At2g25520 OS=Arabidopsis thaliana OX=3702 GN=At2g25520 PE=1 SV=1	AT2G25520.1	Putative sugar phosphate transporter domain-containing protein OS=Rosa chinensis OX=74649 GN=RchiOBHm_Chr2g0088591 PE=4 SV=1	3227.96	3595.14	3585.13	7786.88	6080.79	7828.63
FvH4_1g03370	146.903	2.48745	0.588852	4.22425	2.39743e-05	0.000222037	gi|764507706|ref|XP_011458172.1|	PREDICTED: protein NRT1/ PTR FAMILY 6.2 [Fragaria vesca subsp. vesca]	PTR27_ARATH	Protein NRT1/ PTR FAMILY 6.2 OS=Arabidopsis thaliana OX=3702 GN=NPF6.2 PE=1 SV=1	AT2G26690.1	Putative proton-dependent oligopeptide transporter family, major facilitator superfamily OS=Rosa chinensis OX=74649 GN=RchiOBHm_Chr2g0088601 PE=4 SV=1	29.9083	62.4564	93.4704	291.608	197.043	555.382
FvH4_1g03371	726.272	1.5067	0.214961	7.00919	2.39702e-12	7.51292e-11	gi|764507731|ref|XP_004287330.2|	PREDICTED: zinc finger CCCH domain-containing protein 49-like [Fragaria vesca subsp. vesca]	C3H49_ARATH	Zinc finger CCCH domain-containing protein 49 OS=Arabidopsis thaliana OX=3702 GN=At4g29190 PE=2 SV=1	AT4G29190.1	Putative transcription factor C3H family OS=Rosa chinensis OX=74649 GN=RchiOBHm_Chr2g0092381 PE=4 SV=1	421.921	382.545	270.525	1058.26	948.138	1045.18
FvH4_1g03560	268.284	1.85099	0.339775	5.44769	5.10269e-08	8.12163e-07	gi|470104863|ref|XP_004288812.1|	PREDICTED: uncharacterized protein LOC101300482 [Fragaria vesca subsp. vesca]	-	-	-	Putative dynein ATPase OS=Rosa chinensis OX=74649 GN=RchiOBHm_Chr2g0089081 PE=4 SV=1	170.905	171.755	206.713	713.029	779.698	489.802
FvH4_1g03590	279.341	2.53209	0.571951	4.42712	9.55018e-06	9.79835e-05	gi|470101787|ref|XP_004287350.1|	PREDICTED: uncharacterized protein LOC101305100 [Fragaria vesca subsp. vesca]	-	-	-	Putative aspartate racemase OS=Rosa chinensis OX=74649 GN=RchiOBHm_Chr2g0089121 PE=4 SV=1	61.9529	61.4805	44.9377	401.667	305.099	266.419
FvH4_1g03610	356.754	1.06598	0.217103	4.90999	9.10805e-07	1.1471e-05	gi|470101791|ref|XP_004287352.1|	PREDICTED: zinc finger CCCH domain-containing protein 39 [Fragaria vesca subsp. vesca]	-	-	-	Putative transcription factor C3H family OS=Rosa chinensis OX=74649 GN=RchiOBHm_Chr2g0089141 PE=4 SV=1	375.99	329.848	199.523	568.165	714.016	610.715
FvH4_1g03630	681.54	1.34947	0.371751	3.63005	0.000283364	0.00194159	gi|470101795|ref|XP_004287354.1|	PREDICTED: zinc finger Ran-binding domain-containing protein 2 [Fragaria vesca subsp. vesca]	-	-	-	Uncharacterized protein OS=Prunus persica OX=3760 GN=PRUPE_7G239400 PE=4 SV=1	750.912	507.458	618.343	1538	1709.83	1533.96
FvH4_1g03710	21.2189	-4.8371	1.17155	-4.1288	3.64659e-05	0.000320246	gi|1365960092|ref|XP_024179535.1|	pentatricopeptide repeat-containing protein At1g08070, chloroplastic-like [Rosa chinensis]	-	-	-	Putative tetratricopeptide-like helical domain, DYW domain-containing protein OS=Rosa chinensis OX=74649 GN=RchiOBHm_Chr2g0089161 PE=4 SV=1	36.3172	29.2764	52.1277	0	4.23749	0
FvH4_1g03760	457.567	6.23402	1.15872	5.38009	7.44499e-08	1.1498e-06	gi|470101802|ref|XP_004287357.1|	PREDICTED: early nodulin-93-like [Fragaria vesca subsp. vesca]	-	-	-	Putative early nodulin 93 ENOD93 protein OS=Rosa chinensis OX=74649 GN=RchiOBHm_Chr2g0089171 PE=4 SV=1	36.3172	13.6623	25.1651	1787.28	1993.74	1872.11
FvH4_1g03790	333.92	-1.12183	0.327856	-3.42172	0.000622257	0.00381685	gi|470101806|ref|XP_004287359.1|	PREDICTED: uncharacterized protein LOC101308207 [Fragaria vesca subsp. vesca]	-	-	-	Putative Heat shock protein DnaJ, cysteine-rich OS=Rosa chinensis OX=74649 GN=RchiOBHm_Chr2g0089201 PE=4 SV=1	373.854	372.786	417.022	135.457	254.249	145.506
FvH4_1g03910	996.937	2.76524	0.247199	11.1863	4.76063e-29	1.11461e-26	gi|470101822|ref|XP_004287367.1|	PREDICTED: cytochrome P450 734A1 [Fragaria vesca subsp. vesca]	C734A_ARATH	Cytochrome P450 734A1 OS=Arabidopsis thaliana OX=3702 GN=CYP734A1 PE=2 SV=1	AT2G26710.1	Putative cytochrome P450 OS=Rosa chinensis OX=74649 GN=RchiOBHm_Chr2g0089381 PE=3 SV=1	677.209	688.972	502.404	4174.7	4387.92	4137.7
FvH4_1g04030	1142.2	-1.79237	0.281026	-6.37794	1.79481e-10	4.27922e-09	-	-	HBPL1_ARATH	Heme-binding-like protein At3g10130, chloroplastic OS=Arabidopsis thaliana OX=3702 GN=At3g10130 PE=1 SV=1	AT5G20140.1	Putative SOUL heme-binding protein OS=Rosa chinensis OX=74649 GN=RchiOBHm_Chr2g0089501 PE=4 SV=1	1670.59	1454.06	1808.29	492.912	396.205	534.888
FvH4_1g04050	3040.5	2.04358	0.587194	3.48025	0.000500942	0.00319492	-	-	-	-	-	Uncharacterized protein OS=Rosa chinensis OX=74649 GN=RchiOBHm_Chr2g0089511 PE=4 SV=1	2474.91	2329.43	4180.11	13969.9	10230.4	12840.4
FvH4_1g04070	91.1988	-1.98849	0.481159	-4.13272	3.585e-05	0.000315941	-	-	PP175_ARATH	Pentatricopeptide repeat-containing protein At2g29760, chloroplastic OS=Arabidopsis thaliana OX=3702 GN=PCMP-H33 PE=2 SV=1	AT2G29760.1	Putative tetratricopeptide-like helical domain, DYW domain-containing protein OS=Rosa chinensis OX=74649 GN=RchiOBHm_Chr2g0089561 PE=4 SV=1	179.45	83.9257	131.218	20.6948	29.6624	49.1851
FvH4_1g04140	94.1885	-2.40987	0.621738	-3.87602	0.000106178	0.000821076	-	-	PP431_ARATH	Pentatricopeptide repeat-containing protein At5g55740, chloroplastic OS=Arabidopsis thaliana OX=3702 GN=CRR21 PE=2 SV=1	-	Uncharacterized protein OS=Prunus persica OX=3760 GN=PRUPE_7G235800 PE=4 SV=1	74.7708	97.5881	169.865	22.5761	27.5437	14.3457
FvH4_1g04160	4976.56	-1.18025	0.164016	-7.19592	6.20421e-13	2.15518e-11	-	-	BASS2_ARATH	Sodium/pyruvate cotransporter BASS2, chloroplastic OS=Arabidopsis thaliana OX=3702 GN=BASS2 PE=1 SV=1	-	Putative Bile acid:sodium symporter/arsenical resistance protein Acr3 OS=Rosa chinensis OX=74649 GN=RchiOBHm_Chr2g0089661 PE=4 SV=1	7402.31	6925.82	7172.06	3295.17	2648.43	3543.38
FvH4_1g04210	4101.1	-1.55116	0.296305	-5.23503	1.64961e-07	2.39593e-06	-	-	-	-	-	Putative sulfate-transporting ATPase OS=Rosa chinensis OX=74649 GN=RchiOBHm_Chr2g0089741 PE=3 SV=1	3341.18	4754.49	4655.55	1162.67	1125.05	2063.73
FvH4_1g04240	141.548	3.20428	0.523188	6.12454	9.09468e-10	1.94283e-08	-	-	-	-	-	Auxin-responsive protein OS=Rosa chinensis OX=74649 GN=RchiOBHm_Chr2g0089801 PE=3 SV=1	63.0211	54.6493	93.4704	541.827	1163.19	242.852
FvH4_1g04370	979.15	-1.70454	0.199561	-8.54147	1.32522e-17	8.05904e-16	-	-	PRRP1_ARATH	Proteinaceous RNase P 1, chloroplastic/mitochondrial OS=Arabidopsis thaliana OX=3702 GN=PRORP1 PE=1 SV=1	AT2G32230.2	Putative ribonuclease P OS=Rosa chinensis OX=74649 GN=RchiOBHm_Chr2g0090021 PE=4 SV=1	1227.31	1281.33	1360.71	424.243	354.889	407.827
FvH4_1g04380	874.223	-2.46199	0.345624	-7.12331	1.05367e-12	3.52422e-11	-	-	ABIL5_ORYSJ	Probable protein ABIL5 OS=Oryza sativa subsp. japonica OX=39947 GN=Os01g0760900 PE=2 SV=1	AT5G42030.1	Putative ABI family protein OS=Rosa chinensis OX=74649 GN=RchiOBHm_Chr2g0090031 PE=4 SV=1	997.656	484.037	866.399	82.7791	173.737	170.099
FvH4_1g04420	789.001	1.47295	0.502302	2.93241	0.00336347	0.0157909	-	-	DYL1_CAEEL	Dynein light chain 1, cytoplasmic OS=Caenorhabditis elegans OX=6239 GN=dlc-1 PE=1 SV=1	AT1G52245.1	Dynein light chain OS=Rosa chinensis OX=74649 GN=RchiOBHm_Chr2g0090071 PE=3 SV=1	420.853	353.269	405.338	1240.75	1196.03	837.172
FvH4_1g04450	294.663	-1.85321	0.292914	-6.32683	2.5025e-10	5.79649e-09	-	-	HIBC6_ARATH	3-hydroxyisobutyryl-CoA hydrolase-like protein 3, mitochondrial OS=Arabidopsis thaliana OX=3702 GN=At4g13360 PE=1 SV=2	AT4G13360.1	Putative 3-hydroxyisobutyryl-CoA hydrolase OS=Rosa chinensis OX=74649 GN=RchiOBHm_Chr2g0091031 PE=3 SV=1	328.991	267.391	421.516	73.3724	120.768	88.1233
FvH4_1g04480	31.4703	-3.68432	1.07245	-3.43542	0.000591639	0.00365289	-	-	ADS3_ARATH	Palmitoyl-monogalactosyldiacylglycerol delta-7 desaturase, chloroplastic OS=Arabidopsis thaliana OX=3702 GN=ADS3 PE=1 SV=2	AT3G15850.1	Uncharacterized protein OS=Prunus persica OX=3760 GN=PRUPE_4G259100 PE=3 SV=1	23.4994	56.6011	53.9253	0	10.5937	0
FvH4_1g04510	1361.92	-1.12847	0.194636	-5.79785	6.71699e-09	1.25373e-07	-	-	PLSP1_ARATH	Chloroplast processing peptidase OS=Arabidopsis thaliana OX=3702 GN=PLSP1 PE=2 SV=2	AT3G24590.1	Putative signal peptidase I OS=Rosa chinensis OX=74649 GN=RchiOBHm_Chr2g0090191 PE=4 SV=1	1714.39	1820.02	1492.83	745.012	977.8	576.901
FvH4_1g04540	1635.4	-1.52458	0.272842	-5.58779	2.29984e-08	3.92751e-07	-	-	PP395_ARATH	Pentatricopeptide repeat-containing protein At5g21222 OS=Arabidopsis thaliana OX=3702 GN=ATC401 PE=2 SV=1	AT5G21222.4	Putative tetratricopeptide-like helical domain-containing protein OS=Rosa chinensis OX=74649 GN=RchiOBHm_Chr2g0090251 PE=4 SV=1	2063.67	2191.83	2450.9	909.629	589.011	832.048
FvH4_1g04570	623.161	-1.85131	0.228029	-8.11872	4.71107e-16	2.39263e-14	-	-	TILS_WOLWR	tRNA(Ile)-lysidine synthase OS=Wolbachia sp. subsp. Drosophila simulans (strain wRi) OX=66084 GN=tilS PE=3 SV=1	AT3G24560.1	Putative tRNA(Ile)-lysidine synthetase OS=Rosa chinensis OX=74649 GN=RchiOBHm_Chr2g0090271 PE=3 SV=1	1038.25	829.498	956.274	289.727	275.437	217.234
FvH4_1g04700	2108.02	-1.23205	0.30043	-4.10095	4.11458e-05	0.000354433	-	-	-	-	-	Putative chlorophyll(Ide) b reductase OS=Rosa chinensis OX=74649 GN=RchiOBHm_Chr2g0090301 PE=4 SV=1	2140.58	1895.16	2016.8	810.859	917.416	848.443
FvH4_1g04750	226.027	-1.11995	0.397775	-2.81554	0.00486952	0.0214066	gi|764508267|ref|XP_011458734.1|	PREDICTED: probable polyol transporter 6 [Fragaria vesca subsp. vesca]	PLT5_ARATH	Polyol transporter 5 OS=Arabidopsis thaliana OX=3702 GN=PLT5 PE=1 SV=2	-	Putative major facilitator, sugar transporter, major facilitator superfamily OS=Rosa chinensis OX=74649 GN=RchiOBHm_Chr2g0090351 PE=3 SV=1	190.131	259.584	219.296	101.592	103.818	102.469
FvH4_1g04800	95.0012	-3.40064	0.674792	-5.03953	4.6667e-07	6.21864e-06	gi|525344978|ref|NP_001266982.1|	uncharacterized protein LOC101300089 [Fragaria vesca]	YUC2_ARATH	Indole-3-pyruvate monooxygenase YUCCA2 OS=Arabidopsis thaliana OX=3702 GN=YUC2 PE=1 SV=1	AT4G13260.1	Flavin-containing monooxygenase OS=Fragaria vesca OX=57918 GN=YUC2 PE=2 SV=1	126.042	78.0704	120.433	5.64403	21.1874	4.09876
FvH4_1g04910	61.6404	-1.11921	0.441155	-2.537	0.0111806	0.0421803	gi|764576708|ref|XP_011463226.1|	PREDICTED: uncharacterized protein LOC101313410 isoform X3 [Fragaria vesca subsp. vesca]	-	-	-	Putative kelch-type beta propeller OS=Rosa chinensis OX=74649 GN=RchiOBHm_Chr2g0090681 PE=4 SV=1	83.316	56.6011	70.1028	21.6354	45.553	29.716
FvH4_1g05100	74.7038	2.54403	1.01428	2.50822	0.0121341	0.0450875	gi|470101247|ref|XP_004287088.1|	PREDICTED: aldehyde dehydrogenase family 2 member C4-like [Fragaria vesca subsp. vesca]	-	-	-	Putative oxidoreductase OS=Rosa chinensis OX=74649 GN=RchiOBHm_Chr2g0090741 PE=3 SV=1	39.5217	58.5528	57.5203	415.777	407.858	84.0246
FvH4_1g05220	1345.98	-3.22945	0.824391	-3.91738	8.9518e-05	0.000705448	gi|764521450|ref|XP_011470133.1|	PREDICTED: uncharacterized protein LOC105353118 [Fragaria vesca subsp. vesca]	-	-	AT5G51160.1	Putative PGG domain-containing protein OS=Rosa chinensis OX=74649 GN=RchiOBHm_Chr2g0133631 PE=4 SV=1	3782.33	1514.57	1224.1	306.659	161.024	227.481
FvH4_1g05310	2342.5	-1.92367	0.249181	-7.71998	1.16345e-14	5.00731e-13	gi|470101225|ref|XP_004287077.1|	PREDICTED: fe-S cluster assembly factor HCF101, chloroplastic [Fragaria vesca subsp. vesca]	HF101_ARATH	Fe-S cluster assembly factor HCF101, chloroplastic OS=Arabidopsis thaliana OX=3702 GN=HCF101 PE=1 SV=1	AT3G24430.1	Putative mrp/NBP35 ATP-binding protein OS=Rosa chinensis OX=74649 GN=RchiOBHm_Chr2g0091011 PE=3 SV=1	3232.23	3227.24	4018.33	952.9	885.635	923.246
FvH4_1g05400	6334.84	-3.69846	0.273757	-13.51	1.36556e-41	1.27888e-38	-	-	PINS_FRAVE	(-)-alpha-pinene synthase OS=Fragaria vesca OX=57918 PE=1 SV=2	AT5G23960.1	(-)-alpha-pinene synthase OS=Rosa chinensis OX=74649 GN=RchiOBHm_Chr3g0474411 PE=3 SV=1	16710.2	12153.6	12305.7	776.994	1029.71	1364.89
FvH4_1g05530	106.15	3.61842	0.803497	4.50333	6.68956e-06	7.0742e-05	-	-	-	-	-	Putative adenosylhomocysteine nucleosidase OS=Rosa chinensis OX=74649 GN=RchiOBHm_Chr2g0091231 PE=4 SV=1	10.6815	9.75881	16.1776	229.524	177.974	43.037
FvH4_1g05650	8347.57	-1.57697	0.24023	-6.56441	5.22382e-11	1.35443e-09	-	-	-	-	-	Elongation factor Ts, mitochondrial OS=Rosa chinensis OX=74649 GN=EFTS PE=3 SV=1	11555.3	11515.4	13073.3	4204.8	2762.84	5147.02
FvH4_1g05700	60.8774	-1.40089	0.541073	-2.5891	0.00962283	0.0373074	-	-	YFHM_BACSU	AB hydrolase superfamily protein YfhM OS=Bacillus subtilis (strain 168) OX=224308 GN=yfhM PE=3 SV=1	AT3G51000.1	Putative soluble epoxide hydrolase OS=Rosa chinensis OX=74649 GN=RchiOBHm_Chr5g0007841 PE=4 SV=1	25.6357	44.8905	46.7352	13.1694	21.1874	10.2469
FvH4_1g05810	669.637	-1.19722	0.192073	-6.23315	4.57157e-10	1.01647e-08	-	-	-	-	AT2G44970.3	Putative alpha/Beta hydrolase OS=Rosa chinensis OX=74649 GN=RchiOBHm_Chr2g0091461 PE=4 SV=1	1004.06	846.088	1073.11	357.455	366.543	551.283
FvH4_1g06000	5369.47	1.49684	0.374758	3.99414	6.49291e-05	0.000530421	-	-	-	-	-	Malic enzyme OS=Rosa chinensis OX=74649 GN=RchiOBHm_Chr2g0091741 PE=3 SV=1	4365.54	6358.84	5565.09	16883.2	14114	14975.8
FvH4_1g06050	7.57433	4.73724	1.81241	2.61379	0.00895452	0.0351412	-	-	-	-	-	Putative signal transduction histidine kinase, phosphotransfer (Hpt) domain-containing protein OS=Rosa chinensis OX=74649 GN=RchiOBHm_Chr2g0091811 PE=4 SV=1	0	0	0	1.88134	8.47497	4.09876
FvH4_1g06231	118.552	2.06378	0.545744	3.78159	0.000155828	0.00114965	-	-	-	-	-	-	46.9988	25.3729	53.0265	203.185	170.559	150.629
FvH4_1g06250	77.1685	2.30766	0.69185	3.33549	0.000851484	0.00499269	gi|764508980|ref|XP_004287479.2|	PREDICTED: probable 3-hydroxyisobutyrate dehydrogenase-like 1, mitochondrial [Fragaria vesca subsp. vesca]	3Hid1_ARATH	Probable 3-hydroxyisobutyrate dehydrogenase-like 1, mitochondrial OS=Arabidopsis thaliana OX=3702 GN=At4g29120 PE=1 SV=1	AT4G29120.1	Putative 2-hydroxy-3-oxopropionate reductase OS=Rosa chinensis OX=74649 GN=RchiOBHm_Chr2g0091951 PE=4 SV=1	37.3854	28.3005	3.59502	118.525	138.778	84.0246
FvH4_1g06260	382.273	2.1536	0.302409	7.12149	1.06765e-12	3.55576e-11	gi|470105035|ref|XP_004288894.1|	PREDICTED: receptor-like protein kinase HSL1 [Fragaria vesca subsp. vesca]	HSL1_ARATH	Receptor-like protein kinase HSL1 OS=Arabidopsis thaliana OX=3702 GN=HSL1 PE=2 SV=1	AT5G25930.1	Uncharacterized protein OS=Rosa chinensis OX=74649 GN=RchiOBHm_Chr2g0091961 PE=4 SV=1	257.425	244.946	226.486	1238.86	807.241	1195.81
FvH4_1g06261	46.594	1.9192	0.63141	3.03955	0.00236933	0.0118321	-	-	-	-	-	-	13.886	75.1428	26.9626	146.745	200.221	92.2221
FvH4_1g06290	229.389	1.06307	0.323633	3.2848	0.00102055	0.00582502	gi|470105037|ref|XP_004288895.1|	PREDICTED: multidrug and toxin extrusion protein 2 [Fragaria vesca subsp. vesca]	DTX51_ARATH	Protein DETOXIFICATION 51 OS=Arabidopsis thaliana OX=3702 GN=DTX51 PE=2 SV=1	AT4G29140.1	Protein DETOXIFICATION OS=Prunus yedoensis var. nudiflora OX=2094558 GN=Pyn_18941 PE=3 SV=1	224.312	175.658	177.953	438.353	308.277	460.086
FvH4_1g06530	251.355	-1.7378	0.254135	-6.83811	8.02473e-12	2.36544e-10	gi|764509122|ref|XP_011459491.1|	PREDICTED: myb-like protein Q isoform X4 [Fragaria vesca subsp. vesca]	-	-	-	Putative transcription factor NAM family OS=Rosa chinensis OX=74649 GN=RchiOBHm_Chr2g0092281 PE=4 SV=1	425.125	357.172	335.235	101.592	122.887	110.667
FvH4_1g06560	246.886	-1.97782	0.346813	-5.70284	1.17826e-08	2.11067e-07	gi|764509136|ref|XP_004288902.2|	PREDICTED: nudix hydrolase 8-like [Fragaria vesca subsp. vesca]	NUDT8_ARATH	Nudix hydrolase 8 OS=Arabidopsis thaliana OX=3702 GN=NUDT8 PE=2 SV=2	AT5G47240.1	Putative hydrolase OS=Rosa chinensis OX=74649 GN=RchiOBHm_Chr2g0092301 PE=4 SV=1	397.353	345.462	343.324	92.1858	97.4622	86.074
FvH4_1g06630	2794.23	1.7496	0.374541	4.67133	2.99254e-06	3.40615e-05	gi|764509159|ref|XP_011459525.1|	PREDICTED: inositol oxygenase 4 [Fragaria vesca subsp. vesca]	MIOX4_ARATH	Inositol oxygenase 4 OS=Arabidopsis thaliana OX=3702 GN=MIOX4 PE=2 SV=1	AT4G26260.2	Putative inositol oxygenase OS=Rosa chinensis OX=74649 GN=RchiOBHm_Chr2g0092361 PE=4 SV=1	1986.77	3040.84	3055.76	7035.28	11215.6	8932.22
FvH4_1g06640	2734.36	1.82822	0.190381	9.60296	7.7681e-22	8.26703e-20	gi|764509164|ref|XP_011459526.1|	PREDICTED: zinc finger CCCH domain-containing protein 20 [Fragaria vesca subsp. vesca]	C3H49_ARATH	Zinc finger CCCH domain-containing protein 49 OS=Arabidopsis thaliana OX=3702 GN=At4g29190 PE=2 SV=1	AT4G29190.1	Putative transcription factor C3H family OS=Rosa chinensis OX=74649 GN=RchiOBHm_Chr2g0092381 PE=4 SV=1	2125.63	2088.38	1946.7	8306.13	5438.81	8129.89
FvH4_1g06770	4.85657	-6.5274	2.07417	-3.147	0.00164955	0.0087755	-	-	ESP3_ARATH	Pre-mRNA-splicing factor ATP-dependent RNA helicase DEAH1 OS=Arabidopsis thaliana OX=3702 GN=ESP3 PE=1 SV=1	AT1G32490.1	Putative RNA helicase OS=Rosa chinensis OX=74649 GN=RchiOBHm_Chr2g0092541 PE=4 SV=1	32.0446	4.8794	14.3801	0	0	0
FvH4_1g06800	360.446	-1.16779	0.299888	-3.89408	9.85709e-05	0.00076928	-	-	-	-	AT4G29400.1	Uncharacterized protein OS=Rosa chinensis OX=74649 GN=RchiOBHm_Chr2g0091901 PE=4 SV=1	661.187	572.842	449.377	236.108	306.158	206.987
FvH4_1g06890	258.959	-5.00315	1.12542	-4.44559	8.76513e-06	9.07241e-05	-	-	-	-	-	Putative caffeoyl-CoA O-methyltransferase OS=Prunus yedoensis var. nudiflora OX=2094558 GN=Pyn_31028 PE=4 SV=1	878.022	1165.2	810.676	50.7962	38.1374	0
FvH4_1g06920	57.0675	-1.78973	0.705827	-2.53565	0.0112239	0.0423095	-	-	-	-	-	-	46.9988	54.6493	66.5078	11.2881	16.9499	20.4938
FvH4_1g07062	98.0277	1.4517	0.418827	3.46612	0.000528035	0.00333771	-	-	-	-	-	-	48.0669	92.7086	51.229	173.084	181.153	171.123
FvH4_1g07150	709.171	-1.42064	0.328492	-4.32473	1.52719e-05	0.000148304	-	-	ET2_ARATH	Protein EFFECTOR OF TRANSCRIPTION 2 OS=Arabidopsis thaliana OX=3702 GN=ET2 PE=1 SV=1	AT5G56780.1	Putative transcription factor HRT family OS=Rosa chinensis OX=74649 GN=RchiOBHm_Chr2g0093031 PE=4 SV=1	831.024	773.873	884.374	331.116	289.208	309.456
FvH4_1g07270	1613.68	-1.12727	0.2091	-5.39106	7.00432e-08	1.08532e-06	-	-	-	-	-	Putative thioredoxin-like protein OS=Rosa chinensis OX=74649 GN=RchiOBHm_Chr2g0093171 PE=4 SV=1	2317.89	2036.66	2629.75	1004.64	1067.85	1125.11
FvH4_1g07370	876.265	-2.4279	0.217126	-11.182	4.99505e-29	1.15791e-26	gi|764509698|ref|XP_011460013.1|	PREDICTED: uncharacterized protein LOC101298548 [Fragaria vesca subsp. vesca]	-	-	AT5G56850.3	Uncharacterized protein OS=Rosa chinensis OX=74649 GN=RchiOBHm_Chr2g0093251 PE=4 SV=1	1181.38	1430.64	1496.43	233.286	311.455	219.284
FvH4_1g07390	1388.41	-2.78923	0.376231	-7.41363	1.22893e-13	4.68614e-12	gi|470102228|ref|XP_004287558.1|	PREDICTED: GATA transcription factor 21 [Fragaria vesca subsp. vesca]	-	-	-	Putative transcription factor C2C2-GATA family OS=Rosa chinensis OX=74649 GN=RchiOBHm_Chr2g0093271 PE=4 SV=1	3373.23	2523.63	2737.61	440.234	351.711	457.012
FvH4_1g07401	18734.9	-3.93919	0.426929	-9.22681	2.788e-20	2.38232e-18	gi|470102231|ref|XP_004287559.1|	PREDICTED: beta-galactosidase isoform X5 [Fragaria vesca subsp. vesca]	BGAL_MALDO	Beta-galactosidase OS=Malus domestica OX=3750 PE=1 SV=1	AT4G26140.1	Beta-galactosidase OS=Fragaria ananassa OX=3747 GN=beta-gal3 PE=2 SV=1	30975.4	21559.2	24657.3	1523.89	1432.27	2076.02
FvH4_1g07410	737.111	-1.09114	0.325654	-3.35061	0.000806345	0.00477024	gi|764509724|ref|XP_004287560.2|	PREDICTED: beta-galactosidase isoform X1 [Fragaria vesca subsp. vesca]	BGAL_MALDO	Beta-galactosidase OS=Malus domestica OX=3750 PE=1 SV=1	AT4G26140.1	Beta-galactosidase OS=Rosa chinensis OX=74649 GN=RchiOBHm_Chr2g0093311 PE=3 SV=1	597.098	626.515	744.168	282.201	287.09	354.543
FvH4_1g07560	696.803	1.70717	0.41434	4.12022	3.78508e-05	0.000330056	gi|764509819|ref|XP_011460110.1|	PREDICTED: uncharacterized protein LOC105350215 [Fragaria vesca subsp. vesca]	A70_ARATH	Pathogen-associated molecular patterns-induced protein A70 OS=Arabidopsis thaliana OX=3702 GN=A70 PE=1 SV=1	AT5G56980.1	Uncharacterized protein OS=Actinidia chinensis var. chinensis OX=1590841 GN=CEY00_Acc23336 PE=4 SV=1	100.406	66.3599	34.1527	199.422	108.056	346.345
FvH4_1g07620	622.057	3.18412	0.848641	3.75202	0.000175413	0.00127982	gi|764509841|ref|XP_004288952.2|	PREDICTED: cytokinin dehydrogenase 3 [Fragaria vesca subsp. vesca]	CKX3_ARATH	Cytokinin dehydrogenase 3 OS=Arabidopsis thaliana OX=3702 GN=CKX3 PE=1 SV=1	AT5G56970.1	Putative cytokinin dehydrogenase OS=Rosa chinensis OX=74649 GN=RchiOBHm_Chr2g0093491 PE=4 SV=1	12.8178	7.80704	23.3676	156.151	211.874	32.7901
FvH4_1g07650	307.878	1.64368	0.213965	7.68204	1.56575e-14	6.62911e-13	gi|470102245|ref|XP_004287566.1|	PREDICTED: putative uncharacterized protein YDL057W [Fragaria vesca subsp. vesca]	YD057_YEAST	Putative uncharacterized protein YDL057W OS=Saccharomyces cerevisiae (strain ATCC 204508 / S288c) OX=559292 GN=YDL057W PE=4 SV=1	-	Putative feruloyl esterase OS=Rosa chinensis OX=74649 GN=RchiOBHm_Chr2g0093511 PE=4 SV=1	181.586	222.501	174.358	593.564	675.879	537.962
FvH4_1g07800	515.878	1.91314	0.275739	6.93825	3.96991e-12	1.21659e-10	gi|470102264|ref|XP_004287575.1|	PREDICTED: heat stress transcription factor A-2-like [Fragaria vesca subsp. vesca]	-	-	-	Heat shock factor A9a OS=Fragaria vesca OX=57918 PE=2 SV=1	152.746	189.321	179.751	747.834	457.649	760.32
FvH4_1g07830	280.762	2.18232	0.476037	4.58435	4.55395e-06	4.99164e-05	gi|470102268|ref|XP_004287577.1|	PREDICTED: uncharacterized protein LOC101303548 [Fragaria vesca subsp. vesca]	IQM1_ARATH	IQ domain-containing protein IQM1 OS=Arabidopsis thaliana OX=3702 GN=IQM1 PE=1 SV=1	AT4G33050.4	Uncharacterized protein OS=Rosa chinensis OX=74649 GN=RchiOBHm_Chr2g0093711 PE=4 SV=1	138.86	220.549	239.069	1164.55	985.216	567.678
FvH4_1g07880	65.1104	-1.93916	0.542258	-3.57609	0.000348778	0.00233113	gi|764509978|ref|XP_011460323.1|	PREDICTED: protein FAM63A-like [Fragaria vesca subsp. vesca]	-	-	-	-	50.2032	61.4805	109.648	14.1101	24.3655	19.4691
FvH4_1g07900	139.3	1.12637	0.453628	2.48303	0.013027	0.0477458	gi|764509984|ref|XP_011460334.1|	PREDICTED: uncharacterized protein LOC101305515 [Fragaria vesca subsp. vesca]	-	-	AT2G19460.1	Uncharacterized protein OS=Rosa chinensis OX=74649 GN=RchiOBHm_Chr2g0093771 PE=4 SV=1	67.2937	99.5398	103.357	151.448	299.802	139.358
FvH4_1g07950	2436.97	-2.78549	0.259297	-10.7425	6.43123e-27	1.21431e-24	gi|470102278|ref|XP_004287582.1|	PREDICTED: lycopene epsilon cyclase, chloroplastic [Fragaria vesca subsp. vesca]	LCYE_ARATH	Lycopene epsilon cyclase, chloroplastic OS=Arabidopsis thaliana OX=3702 GN=LUT2 PE=1 SV=2	AT5G57030.1	Lycopene epsilon cyclase OS=Fragaria ananassa OX=3747 PE=2 SV=1	3486.45	3519.03	3947.33	491.03	605.961	491.851
FvH4_1g07981	2256.54	1.24613	0.322382	3.86538	0.000110915	0.000853389	gi|764510022|ref|XP_011460386.1|	PREDICTED: putative nuclease HARBI1 [Fragaria vesca subsp. vesca]	ALPL_ARATH	Protein ALP1-like OS=Arabidopsis thaliana OX=3702 GN=At3g55350 PE=2 SV=1	AT5G12010.1	Putative harbinger transposase-derived nuclease domain-containing protein OS=Rosa chinensis OX=74649 GN=RchiOBHm_Chr2g0094021 PE=4 SV=1	119.633	146.382	167.168	256.803	288.149	483.654
FvH4_1g08010	754.45	1.01232	0.328379	3.08279	0.00205071	0.0105246	gi|1365959817|ref|XP_024179413.1|	protein phosphatase 2C 77-like [Rosa chinensis]	P2C16_ARATH	Protein phosphatase 2C 16 OS=Arabidopsis thaliana OX=3702 GN=HAB1 PE=1 SV=1	AT1G72770.4	Uncharacterized protein OS=Rosa chinensis OX=74649 GN=RchiOBHm_Chr2g0094051 PE=3 SV=1	477.465	634.322	652.496	1313.18	938.603	1307.5
FvH4_1g08040	128.12	1.21159	0.361094	3.35535	0.000792655	0.00470215	-	-	PPR23_ARATH	Pentatricopeptide repeat-containing protein At1g09190 OS=Arabidopsis thaliana OX=3702 GN=PCMP-E70 PE=2 SV=1	AT1G09190.1	Putative tetratricopeptide-like helical domain-containing protein OS=Rosa chinensis OX=74649 GN=RchiOBHm_Chr2g0094071 PE=4 SV=1	93.9975	81.974	79.0904	159.914	194.924	235.679
FvH4_1g08190	795.449	2.01243	0.256251	7.85335	4.05083e-15	1.85601e-13	-	-	-	-	-	Uncharacterized protein OS=Prunus persica OX=3760 GN=PRUPE_7G203300 PE=4 SV=1	529.804	624.564	415.224	1935.9	2368.75	2026.84
FvH4_1g08370	1060.64	-1.42327	0.196341	-7.24894	4.20031e-13	1.49911e-11	gi|470105199|ref|XP_004288974.1|	PREDICTED: transcription factor WER-like [Fragaria vesca subsp. vesca]	MYBC_MAIZE	Anthocyanin regulatory C1 protein OS=Zea mays OX=4577 GN=C1 PE=2 SV=1	AT3G13540.1	Putative transcription factor MYB-HB-like family OS=Rosa chinensis OX=74649 GN=RchiOBHm_Chr2g0094451 PE=4 SV=1	1832.95	1567.26	2025.79	731.842	658.929	632.234
FvH4_1g08440	1088.64	-2.37486	0.266578	-8.90869	5.16387e-19	3.88751e-17	-	-	GRF1_ORYSJ	Growth-regulating factor 1 OS=Oryza sativa subsp. japonica OX=39947 GN=GRF1 PE=3 SV=1	AT3G13960.1	Putative transcription factor interactor and regulator C3H-WRC/GRF family OS=Rosa chinensis OX=74649 GN=RchiOBHm_Chr2g0094541 PE=4 SV=1	828.887	542.59	433.2	99.7112	135.6	112.716
FvH4_1g08451	50.4801	-2.00395	0.77271	-2.5934	0.00950321	0.0369109	-	-	OPR3_SOLLC	12-oxophytodienoate reductase 3 OS=Solanum lycopersicum OX=4081 GN=OPR3 PE=1 SV=1	AT2G06050.3	Putative 12-oxophytodienoate reductase OS=Rosa chinensis OX=74649 GN=RchiOBHm_Chr2g0150041 PE=4 SV=1	74.7708	51.7217	32.3552	10.3474	18.0093	11.2716
FvH4_1g08452	156.88	-1.90096	0.460512	-4.12792	3.66057e-05	0.000321233	-	-	OPR3_SOLLC	12-oxophytodienoate reductase 3 OS=Solanum lycopersicum OX=4081 GN=OPR3 PE=1 SV=1	AT2G06050.3	Putative 12-oxophytodienoate reductase OS=Rosa chinensis OX=74649 GN=RchiOBHm_Chr2g0150041 PE=4 SV=1	93.9975	154.189	169.865	26.3388	59.3248	26.6419
FvH4_1g08531	20145.7	-3.82239	0.433099	-8.82568	1.08799e-18	7.76621e-17	-	-	AB19A_PRUPE	Auxin-binding protein ABP19a OS=Prunus persica OX=3760 GN=ABP19A PE=3 SV=1	AT5G20630.1	Putative germin, rmlC-like cupin domain, rmlC-like jelly roll OS=Rosa chinensis OX=74649 GN=RchiOBHm_Chr2g0094741 PE=3 SV=1	31894	28935.8	36631.4	2022.44	2086.96	2779.98
FvH4_1g08540	6652.29	-4.6776	0.447717	-10.4477	1.50162e-25	2.49343e-23	-	-	ABP20_PRUPE	Auxin-binding protein ABP20 OS=Prunus persica OX=3760 GN=ABP20 PE=2 SV=1	AT5G20630.1	Uncharacterized protein OS=Gossypium barbadense OX=3634 GN=GOBAR_AA33812 PE=3 SV=1	12767.6	10828.4	12815.3	342.404	389.849	690.641
FvH4_1g08541	167.277	-3.69262	0.64505	-5.72454	1.03715e-08	1.87801e-07	-	-	AB19A_PRUPE	Auxin-binding protein ABP19a OS=Prunus persica OX=3760 GN=ABP19A PE=3 SV=1	AT5G20630.1	Putative germin, rmlC-like cupin domain-containing protein OS=Rosa chinensis OX=74649 GN=RchiOBHm_Chr2g0094781 PE=3 SV=1	79.0434	52.6975	75.4954	5.64403	2.11874	8.19752
FvH4_1g08570	1096.16	-3.50798	1.36074	-2.57799	0.00993763	0.0382555	-	-	AB19B_PRUPE	Auxin-binding protein ABP19b OS=Prunus persica OX=3760 GN=ABP19B PE=3 SV=1	AT5G20630.1	Putative germin OS=Rosa chinensis OX=74649 GN=RchiOBHm_Chr2g0094791 PE=3 SV=1	27.772	29.2764	0	1.88134	1.05937	2.04938
FvH4_1g08660	424.092	-1.8147	0.35294	-5.14168	2.72288e-07	3.79922e-06	-	-	-	-	-	Uncharacterized protein OS=Rosa chinensis OX=74649 GN=RchiOBHm_Chr2g0094991 PE=4 SV=1	382.399	364.003	391.857	102.533	83.6904	137.308
FvH4_1g08760	41185.3	1.2789	0.20774	6.15624	7.44902e-10	1.60593e-08	-	-	-	-	-	Putative cathepsin H OS=Rosa chinensis OX=74649 GN=RchiOBHm_Chr2g0095151 PE=3 SV=1	33813.5	31028.1	33112.8	88006.4	62055.9	87626.4
FvH4_1g08770	541.398	1.77492	0.463923	3.8259	0.000130297	0.000984397	gi|470102396|ref|XP_004287640.1|	PREDICTED: serine/threonine-protein kinase At5g01020-like [Fragaria vesca subsp. vesca]	RIPK_ARATH	Serine/threonine-protein kinase RIPK OS=Arabidopsis thaliana OX=3702 GN=RIPK PE=1 SV=1	AT2G05940.1	Uncharacterized protein OS=Rosa chinensis OX=74649 GN=RchiOBHm_Chr2g0095161 PE=4 SV=1	328.991	702.634	492.517	1981.05	1862.38	1373.08
FvH4_1g08780	245.722	-1.59958	0.300951	-5.31509	1.06602e-07	1.59582e-06	gi|470105225|ref|XP_004288987.1|	PREDICTED: flavonoid 3'-monooxygenase-like [Fragaria vesca subsp. vesca]	F3PH_ARATH	Flavonoid 3'-monooxygenase OS=Arabidopsis thaliana OX=3702 GN=CYP75B1 PE=1 SV=1	AT5G07990.1	Putative flavonoid 3'-monooxygenase OS=Rosa chinensis OX=74649 GN=RchiOBHm_Chr2g0095221 PE=3 SV=1	343.946	421.58	440.39	171.202	88.9872	137.308
FvH4_1g08790	1114.78	1.33471	0.325559	4.09974	4.13608e-05	0.000355915	gi|470105227|ref|XP_004288988.1|	PREDICTED: flavonoid 3'-monooxygenase-like [Fragaria vesca subsp. vesca]	F3PH_ARATH	Flavonoid 3'-monooxygenase OS=Arabidopsis thaliana OX=3702 GN=CYP75B1 PE=1 SV=1	AT5G07990.1	Flavonoid 3'-hydroxylase OS=Rosa rugosa OX=74645 GN=F3'H PE=2 SV=1	1305.28	1520.42	986.832	3484.25	2231.04	3899.97
FvH4_1g08831	7.72138	3.9216	1.32522	2.95921	0.0030843	0.0147133	-	-	-	-	-	-	0	1.95176	1.79751	9.40671	12.7125	35.8642
FvH4_1g08840	7382.39	1.97958	0.315766	6.26912	3.63099e-10	8.19002e-09	gi|470102398|ref|XP_004287641.1|	PREDICTED: subtilisin-like protease [Fragaria vesca subsp. vesca]	-	-	-	Putative cucumisin OS=Rosa chinensis OX=74649 GN=RchiOBHm_Chr2g0095311 PE=4 SV=1	3304.87	3390.21	2534.49	12688.7	10958.1	12751.2
FvH4_1g08850	226.208	-3.61142	0.534365	-6.75834	1.39581e-11	3.91848e-10	gi|764510494|ref|XP_011460819.1|	PREDICTED: guanine nucleotide-binding protein subunit gamma 3 isoform X1 [Fragaria vesca subsp. vesca]	-	-	-	Putative G-protein gamma OS=Rosa chinensis OX=74649 GN=RchiOBHm_Chr2g0095321 PE=4 SV=1	322.582	154.189	192.333	27.2795	19.0687	8.19752
FvH4_1g08870	43.5563	2.75973	0.828403	3.33139	0.000864141	0.00505298	gi|470102400|ref|XP_004287642.1|	PREDICTED: protein LURP-one-related 6 [Fragaria vesca subsp. vesca]	LOR6_ARATH	Protein LURP-one-related 6 OS=Arabidopsis thaliana OX=3702 GN=At2g05910 PE=2 SV=1	AT2G05910.1	Putative tubby-like domain-containing protein OS=Rosa chinensis OX=74649 GN=RchiOBHm_Chr2g0095331 PE=4 SV=1	0	1.95176	5.39253	13.1694	16.9499	21.5185
FvH4_1g09000	20.2421	9.39826	2.1421	4.3874	1.14713e-05	0.000115369	gi|764510597|ref|XP_011460904.1|	PREDICTED: uncharacterized protein LOC105350493 [Fragaria vesca subsp. vesca]	-	-	AT1G72490.2	Uncharacterized protein OS=Prunus persica OX=3760 GN=PRUPE_7G195900 PE=4 SV=1	0	0	0	112.881	106.997	144.481
FvH4_1g09040	2520.73	-3.89597	0.374708	-10.3974	2.54914e-25	4.08788e-23	gi|470105245|ref|XP_004288997.1|	PREDICTED: chlorophyll a-b binding protein, chloroplastic [Fragaria vesca subsp. vesca]	LHCA6_ARATH	Photosystem I chlorophyll a/b-binding protein 6, chloroplastic OS=Arabidopsis thaliana OX=3702 GN=LHCA6 PE=1 SV=1	AT1G19150.1	Chlorophyll a-b binding protein, chloroplastic OS=Rosa chinensis OX=74649 GN=RchiOBHm_Chr2g0095461 PE=3 SV=1	3022.88	2839.81	4055.18	146.745	292.387	227.481
FvH4_1g09160	7628.98	-1.0407	0.249219	-4.17583	2.969e-05	0.000266948	gi|470102438|ref|XP_004287661.1|	PREDICTED: 20 kDa chaperonin, chloroplastic [Fragaria vesca subsp. vesca]	-	-	-	Putative groES chaperonin family OS=Rosa chinensis OX=74649 GN=RchiOBHm_Chr2g0095561 PE=3 SV=1	9829.15	10262.4	8750.27	4292.28	5832.9	3894.85
FvH4_1g09250	2771.37	-3.58467	0.277387	-12.923	3.33906e-38	2.52185e-35	gi|470102448|ref|XP_004287666.1|	PREDICTED: peroxiredoxin Q, chloroplastic [Fragaria vesca subsp. vesca]	-	-	-	Putative peroxiredoxin OS=Rosa chinensis OX=74649 GN=RchiOBHm_Chr2g0095781 PE=4 SV=1	5045.96	3708.35	5474.31	383.794	272.259	529.765
FvH4_1g09280	79.7465	1.39641	0.511356	2.7308	0.00631804	0.0264151	gi|470105258|ref|XP_004289003.1|	PREDICTED: uncharacterized protein LOC101294986 [Fragaria vesca subsp. vesca]	-	-	-	Putative small auxin-up RNA OS=Rosa chinensis OX=74649 GN=RchiOBHm_Chr2g0095841 PE=4 SV=1	23.4994	44.8905	86.2804	158.033	170.559	79.9258
FvH4_1g09560	704.168	3.40621	0.517281	6.58484	4.55381e-11	1.20017e-09	-	-	PME54_ARATH	Probable pectinesterase/pectinesterase inhibitor 54 OS=Arabidopsis thaliana OX=3702 GN=PME54 PE=2 SV=1	AT5G20860.2	Pectinesterase OS=Rosa chinensis OX=74649 GN=RchiOBHm_Chr2g0096371 PE=3 SV=1	427.261	257.632	273.221	3408.99	2743.77	4002.44
FvH4_1g09610	18117.5	1.02483	0.308079	3.32651	0.000879418	0.00512823	-	-	PME_PRUPE	Pectinesterase/pectinesterase inhibitor PPE8B OS=Prunus persica OX=3760 PE=2 SV=1	AT4G33220.1	Pectinesterase OS=Fragaria ananassa OX=3747 GN=PE1 PE=2 SV=1	6473.01	6488.63	6819.75	13398.9	8030.04	18820.5
FvH4_1g09620	239.793	-1.41776	0.352903	-4.01743	5.88356e-05	0.000486755	-	-	OFP11_ARATH	Transcription repressor OFP11 OS=Arabidopsis thaliana OX=3702 GN=OFP11 PE=2 SV=1	-	Putative transcription factor OFP family OS=Rosa chinensis OX=74649 GN=RchiOBHm_Chr6g0290721 PE=4 SV=1	305.492	320.089	213.005	81.8384	146.193	86.074
FvH4_1g09640	3565.77	-1.3495	0.468031	-2.88335	0.00393471	0.0179368	-	-	AASS_ARATH	Alpha-aminoadipic semialdehyde synthase OS=Arabidopsis thaliana OX=3702 GN=LKR/SDH PE=1 SV=1	-	Putative oxidoreductase OS=Rosa chinensis OX=74649 GN=RchiOBHm_Chr2g0096481 PE=4 SV=1	1623.59	2634.88	1224.1	869.18	792.41	489.802
FvH4_1g09671	384.694	-1.05411	0.31519	-3.34435	0.000824766	0.00486037	-	-	-	-	-	Putative transcription factor C2H2 family OS=Rosa chinensis OX=74649 GN=RchiOBHm_Chr2g0096531 PE=4 SV=1	435.807	448.905	409.832	221.998	208.696	192.642
FvH4_1g09790	1714.85	-1.08762	0.197865	-5.49679	3.86775e-08	6.27768e-07	gi|764511091|ref|XP_011461292.1|	PREDICTED: uncharacterized protein LOC101313920 [Fragaria vesca subsp. vesca]	-	-	AT3G51510.1	Uncharacterized protein OS=Rosa chinensis OX=74649 GN=RchiOBHm_Chr2g0096661 PE=4 SV=1	2061.54	2022.02	2332.27	1059.2	1017	942.715
FvH4_1g09820	524.353	1.44153	0.35586	4.05083	5.10361e-05	0.000428129	-	-	LRKS5_ARATH	Probable L-type lectin-domain containing receptor kinase S.5 OS=Arabidopsis thaliana OX=3702 GN=LECRKS5 PE=2 SV=1	AT5G06740.1	Uncharacterized protein OS=Rosa chinensis OX=74649 GN=RchiOBHm_Chr2g0096621 PE=4 SV=1	482.805	689.948	251.651	1614.19	1345.4	907.875
FvH4_1g09830	536.875	1.13212	0.276866	4.08903	4.33175e-05	0.000370413	-	-	DAO_ORYSJ	2-oxoglutarate-dependent dioxygenase DAO OS=Oryza sativa subsp. japonica OX=39947 GN=DAO PE=2 SV=2	AT1G14130.1	Putative gibberellin 3-beta-dioxygenase OS=Rosa chinensis OX=74649 GN=RchiOBHm_Chr2g0096611 PE=3 SV=1	324.719	341.558	361.299	788.283	781.816	682.444
FvH4_1g09900	53.7659	-2.36048	0.698861	-3.37761	0.000731176	0.004385	-	-	-	-	AT5G12460.1	Putative N-acetylgalactosaminide beta-1,3-galactosyltransferase OS=Rosa chinensis OX=74649 GN=RchiOBHm_Chr5g0052791 PE=4 SV=1	140.996	117.106	34.1527	33.8642	6.35623	16.395
FvH4_1g10150	1415.92	1.02073	0.141867	7.19497	6.24745e-13	2.16699e-11	-	-	-	-	-	MLO-like protein OS=Rosa chinensis OX=74649 GN=MLO PE=3 SV=1	963.475	1216.92	1020.98	2278.31	2125.1	2092.42
FvH4_1g10180	3894.12	2.5101	0.182661	13.7419	5.69817e-43	6.35292e-40	gi|470102546|ref|XP_004287713.1|	PREDICTED: uncharacterized transporter YBR287W isoform X2 [Fragaria vesca subsp. vesca]	PILS5_ARATH	Protein PIN-LIKES 5 OS=Arabidopsis thaliana OX=3702 GN=PILS5 PE=2 SV=1	AT2G17500.4	Putative membrane transport protein OS=Rosa chinensis OX=74649 GN=RchiOBHm_Chr2g0096951 PE=4 SV=1	1425.99	1723.4	1564.73	10460.3	7046.94	9348.25
FvH4_1g10192	37.2279	-2.1615	0.789163	-2.73898	0.00616301	0.0259103	gi|1009144012|ref|XP_015889569.1|	PREDICTED: LOW QUALITY PROTEIN: glutamate receptor 3.6-like [Ziziphus jujuba]	GLR36_ARATH	Glutamate receptor 3.6 OS=Arabidopsis thaliana OX=3702 GN=GLR3.6 PE=2 SV=1	AT1G05200.7	Uncharacterized protein (Fragment) OS=Prunus persica OX=3760 GN=PRUPE_ppa025247mg PE=3 SV=1	64.0892	50.7458	39.5452	5.64403	6.35623	22.5432
FvH4_1g10380	30.5308	3.12091	1.07989	2.89002	0.00385222	0.0176363	gi|470105334|ref|XP_004289040.1|	PREDICTED: ankyrin repeat-containing protein At3g12360-like [Fragaria vesca subsp. vesca]	-	-	-	Putative ankyrin repeat-containing domain, PGG domain, protein accelerated cell death 6 OS=Rosa chinensis OX=74649 GN=RchiOBHm_Chr7g0237491 PE=4 SV=1	0	9.75881	23.3676	135.457	84.7497	69.6789
FvH4_1g10400	45.8494	5.13598	0.99364	5.16886	2.35529e-07	3.32596e-06	gi|764511473|ref|XP_011461650.1|	PREDICTED: ankyrin repeat-containing protein At5g02620-like [Fragaria vesca subsp. vesca]	-	-	-	Putative ankyrin repeat-containing domain, PGG domain, protein accelerated cell death 6 OS=Rosa chinensis OX=74649 GN=RchiOBHm_Chr7g0213401 PE=4 SV=1	2.13631	7.80704	0	118.525	145.134	84.0246
FvH4_1g10640	768.058	1.78349	0.379676	4.69741	2.63486e-06	3.03294e-05	gi|764511614|ref|XP_011461764.1|	PREDICTED: LOW QUALITY PROTEIN: endochitinase-like [Fragaria vesca subsp. vesca]	CHIX_PEA	Endochitinase OS=Pisum sativum OX=3888 PE=2 SV=1	AT3G12500.1	Chitinase OS=Fragaria ananassa OX=3747 GN=Chi2-2 PE=2 SV=1	700.709	884.148	711.813	3499.3	3000.14	1406.9
FvH4_1g10661	3619.67	4.03997	0.387855	10.4162	2.09196e-25	3.37787e-23	-	-	CHIX_PEA	Endochitinase OS=Pisum sativum OX=3888 PE=2 SV=1	AT3G12500.1	Putative chitinase OS=Rosa chinensis OX=74649 GN=RchiOBHm_Chr2g0097821 PE=4 SV=1	786.161	1171.06	1177.37	20990.1	17340.9	13235.9
FvH4_1g10720	171.262	1.63662	0.445338	3.67501	0.000237838	0.00166622	-	-	-	-	AT4G35690.1	Uncharacterized protein OS=Rosa chinensis OX=74649 GN=RchiOBHm_Chr2g0097881 PE=4 SV=1	123.906	147.358	150.991	492.912	391.968	428.32
FvH4_1g10770	2416.93	1.67162	0.374419	4.46457	8.023e-06	8.38209e-05	-	-	LHTL8_ARATH	Lysine histidine transporter-like 8 OS=Arabidopsis thaliana OX=3702 GN=AATL1 PE=1 SV=1	AT1G47670.1	Putative amino acid transporter, transmembrane domain-containing protein OS=Rosa chinensis OX=74649 GN=RchiOBHm_Chr2g0097951 PE=4 SV=1	1491.14	1612.15	1375.09	5768.2	3582.79	4915.44
FvH4_1g10880	364.514	1.18419	0.358778	3.30061	0.000964755	0.00554808	-	-	SKI23_ARATH	F-box protein SKIP23 OS=Arabidopsis thaliana OX=3702 GN=SKIP23 PE=1 SV=1	-	Uncharacterized protein OS=Rosa chinensis OX=74649 GN=RchiOBHm_Chr2g0098151 PE=4 SV=1	222.176	342.534	308.273	746.893	451.292	785.937
FvH4_1g10900	737.525	-1.29972	0.337701	-3.84873	0.000118731	0.000905491	-	-	U548_ARATH	UPF0548 protein At2g17695 OS=Arabidopsis thaliana OX=3702 GN=At2g17695 PE=2 SV=1	-	Uncharacterized protein OS=Prunus persica OX=3760 GN=PRUPE_7G176600 PE=4 SV=1	751.98	774.849	902.349	269.032	529.686	188.543
FvH4_1g10930	11552.5	-1.84693	0.56865	-3.24793	0.00116249	0.00653006	-	-	-	-	-	Putative thiosulfate sulfurtransferase OS=Rosa chinensis OX=74649 GN=RchiOBHm_Chr2g0098191 PE=4 SV=1	27014.7	15988.8	17368.4	5121.01	6018.29	5642.97
FvH4_1g11020	527.532	-1.48649	0.295094	-5.03734	4.7205e-07	6.27961e-06	-	-	-	-	-	Phospholipase D OS=Rosa chinensis OX=74649 GN=RchiOBHm_Chr2g0098271 PE=3 SV=1	738.094	666.526	567.114	266.21	171.618	265.395
FvH4_1g11071	134.221	1.33852	0.435946	3.07039	0.00213779	0.0108832	gi|470102656|ref|XP_004287767.1|	PREDICTED: uncharacterized protein LOC101311607 [Fragaria vesca subsp. vesca]	-	-	AT2G17705.1	Uncharacterized protein OS=Rosa chinensis OX=74649 GN=RchiOBHm_Chr2g0098341 PE=4 SV=1	93.9975	87.8292	52.1277	195.66	307.218	88.1233
FvH4_1g11240	2141.92	-1.57867	0.314152	-5.02519	5.02935e-07	6.66396e-06	-	-	-	-	AT5G66090.1	Putative rossmann-like alpha/beta/alpha sandwich protein OS=Rosa chinensis OX=74649 GN=RchiOBHm_Chr2g0098651 PE=4 SV=1	2584.93	2550.95	2899.38	585.098	1408.96	696.789
FvH4_1g11270	12.295	-4.65402	1.69125	-2.75183	0.00592641	0.0250506	-	-	FD_ARATH	Protein FD OS=Arabidopsis thaliana OX=3702 GN=FD PE=1 SV=1	-	Putative transcription factor bZIP family OS=Rosa chinensis OX=74649 GN=RchiOBHm_Chr2g0098731 PE=4 SV=1	12.8178	3.90352	32.3552	1.88134	0	0
FvH4_1g11280	146.064	-2.15184	0.789608	-2.7252	0.00642619	0.0267668	-	-	RN215_MOUSE	RING finger protein 215 OS=Mus musculus OX=10090 GN=Rnf215 PE=2 SV=1	-	Putative transcription factor C2H2 family OS=Rosa chinensis OX=74649 GN=RchiOBHm_Chr2g0098751 PE=4 SV=1	39.5217	8.78292	15.2788	1.88134	5.29686	7.17283
FvH4_1g11310	3277.17	-1.41671	0.195062	-7.2629	3.78885e-13	1.35848e-11	-	-	-	-	-	Putative PLAC8 motif-containing protein OS=Rosa chinensis OX=74649 GN=RchiOBHm_Chr2g0098791 PE=4 SV=1	2505.89	1735.12	2237.9	626.487	794.529	1006.25
FvH4_1g11330	407.783	-1.70623	0.401409	-4.2506	2.13202e-05	0.000199429	-	-	-	-	-	Uncharacterized protein OS=Daucus carota subsp. sativus OX=79200 GN=DCAR_009501 PE=3 SV=1	348.218	538.686	488.922	102.533	180.093	139.358
FvH4_1g11341	362.357	-2.15468	0.446103	-4.83	1.36531e-06	1.65627e-05	-	-	-	-	-	Putative triacylglycerol lipase OS=Rosa chinensis OX=74649 GN=RchiOBHm_Chr2g0098861 PE=3 SV=1	467.851	561.131	737.877	95.9485	85.8091	215.185
FvH4_1g11342	345.631	-2.0288	0.354761	-5.71878	1.07293e-08	1.93533e-07	-	-	-	-	-	Putative triacylglycerol lipase OS=Rosa chinensis OX=74649 GN=RchiOBHm_Chr2g0098851 PE=3 SV=1	498.828	556.252	592.279	85.6011	151.49	167.024
FvH4_1g11370	68.087	-3.6409	1.06646	-3.41401	0.000640134	0.00391403	-	-	-	-	-	Uncharacterized protein (Fragment) OS=Prunus persica OX=3760 GN=PRUPE_ppa016982mg PE=4 SV=1	106.815	146.382	73.6978	5.64403	2.11874	18.4444
FvH4_1g11390	2815.05	-2.86789	0.418922	-6.84588	7.6009e-12	2.24413e-10	-	-	-	-	-	Putative triacylglycerol lipase OS=Rosa chinensis OX=74649 GN=RchiOBHm_Chr2g0098921 PE=3 SV=1	3286.71	3294.57	5893.13	513.607	580.536	614.814
FvH4_1g11431	55.8482	-4.70248	1.76943	-2.65762	0.00786937	0.0315814	-	-	-	-	-	Uncharacterized protein OS=Coffea canephora OX=49390 GN=GSCOC_T00037012001 PE=4 SV=1	12.8178	0	1.79751	0	0	0
FvH4_1g11600	363.559	1.14873	0.348175	3.29928	0.00096933	0.00556918	gi|764512037|ref|XP_011462239.1|	PREDICTED: alpha-mannosidase isoform X2 [Fragaria vesca subsp. vesca]	MANA_CANEN	Alpha-mannosidase OS=Canavalia ensiformis OX=3823 PE=1 SV=1	AT5G66150.2	Alpha-mannosidase OS=Rosa chinensis OX=74649 GN=RchiOBHm_Chr2g0099201 PE=3 SV=1	151.678	318.137	192.333	425.183	480.955	562.555
FvH4_1g11700	140.748	-1.87592	0.414268	-4.52828	5.94669e-06	6.35463e-05	gi|764512092|ref|XP_011462264.1|	PREDICTED: protein NUCLEAR FUSION DEFECTIVE 4-like [Fragaria vesca subsp. vesca]	-	-	-	Putative major facilitator superfamily domain-containing protein OS=Rosa chinensis OX=74649 GN=RchiOBHm_Chr2g0099271 PE=4 SV=1	276.652	244.946	177.055	64.9063	74.156	51.2345
FvH4_1g11710	924.706	-1.5372	0.371113	-4.14212	3.44111e-05	0.000304946	gi|470102730|ref|XP_004287804.1|	PREDICTED: thaumatin-like protein 1b [Fragaria vesca subsp. vesca]	-	-	-	Putative thaumatin OS=Rosa chinensis OX=74649 GN=RchiOBHm_Chr2g0099291 PE=4 SV=1	1164.29	628.467	647.103	255.863	203.399	381.185
FvH4_1g11721	1187.96	1.54722	0.498752	3.10218	0.00192099	0.00995049	gi|470102736|ref|XP_004287807.1|	PREDICTED: cold shock domain-containing protein 3 [Fragaria vesca subsp. vesca]	-	-	-	Putative transcription factor interactor and regulator CCHC(Zn) family OS=Rosa chinensis OX=74649 GN=RchiOBHm_Chr2g0099321 PE=4 SV=1	559.713	843.161	679.458	1769.4	3089.13	1227.58
FvH4_1g11730	28999.6	-1.99886	0.243881	-8.19603	2.48454e-16	1.3072e-14	gi|470102732|ref|XP_004287805.1|	PREDICTED: ferredoxin--NADP reductase, leaf isozyme, chloroplastic [Fragaria vesca subsp. vesca]	-	-	-	Ferredoxin--NADP reductase, chloroplastic OS=Rosa chinensis OX=74649 GN=RchiOBHm_Chr2g0099331 PE=3 SV=1	43809.3	37951	49500.7	10627.7	9021.61	13191.9
FvH4_1g11810	8557.94	1.20007	0.356948	3.36204	0.000773694	0.00459992	gi|470102750|ref|XP_004287814.1|	PREDICTED: naringenin,2-oxoglutarate 3-dioxygenase [Fragaria vesca subsp. vesca]	-	-	-	Flavanone 3-hydroxylase OS=Fragaria ananassa OX=3747 GN=FHT PE=2 SV=1	3608.22	7516.23	6631.01	15205	14864	10725.4
FvH4_1g11880	72.2079	2.94688	1.09742	2.68527	0.00724707	0.0294934	gi|1009144161|ref|XP_015889648.1|	PREDICTED: uncharacterized protein LOC107424376 [Ziziphus jujuba]	-	-	-	Uncharacterized protein OS=Quercus suber OX=58331 GN=CFP56_31208 PE=4 SV=1	42.7261	72.2152	25.1651	509.844	389.849	180.345
FvH4_1g11950	15.3633	-3.64469	1.2524	-2.91016	0.00361243	0.0167051	gi|764512209|ref|XP_011462352.1|	PREDICTED: endoglucanase 2-like [Fragaria vesca subsp. vesca]	GUN24_ORYSJ	Endoglucanase 24 OS=Oryza sativa subsp. japonica OX=39947 GN=Os09g0533900 PE=2 SV=1	AT1G19940.3	Endoglucanase OS=Rosa chinensis OX=74649 GN=RchiOBHm_Chr2g0099571 PE=3 SV=1	17.0905	13.6623	17.9751	3.76269	0	0
FvH4_1g11980	134.295	8.2618	0.932429	8.86051	7.96489e-19	5.75562e-17	gi|470102770|ref|XP_004287824.1|	PREDICTED: auxin-induced protein 15A [Fragaria vesca subsp. vesca]	SAU50_ARATH	Auxin-responsive protein SAUR50 OS=Arabidopsis thaliana OX=3702 GN=SAUR50 PE=1 SV=1	AT4G34760.1	Putative small auxin-up RNA OS=Rosa chinensis OX=74649 GN=RchiOBHm_Chr2g0099601 PE=4 SV=1	0	1.95176	3.59502	612.377	434.342	711.135
FvH4_1g12210	530.105	-1.17497	0.291707	-4.0279	5.62763e-05	0.000467226	-	-	-	-	-	Putative cytochrome P450 OS=Rosa chinensis OX=74649 GN=RchiOBHm_Chr2g0099981 PE=3 SV=1	1160.01	856.823	706.421	460.929	398.324	346.345
FvH4_1g12211	130.064	-1.66811	0.524995	-3.17738	0.00148611	0.00804495	-	-	-	-	-	-	228.585	142.479	115.041	39.5082	19.0687	94.2715
FvH4_1g12240	161.517	1.55778	0.4316	3.60933	0.000306992	0.00208035	-	-	-	-	-	Putative non-specific serine/threonine protein kinase OS=Rosa chinensis OX=74649 GN=RchiOBHm_Chr2g0100021 PE=4 SV=1	128.178	208.838	115.041	539.945	298.743	491.851
FvH4_1g12330	648.308	-1.37939	0.195598	-7.05217	1.76152e-12	5.64191e-11	-	-	-	-	-	Putative 3-epi-6-deoxocathasterone 23-monooxygenase OS=Rosa chinensis OX=74649 GN=RchiOBHm_Chr2g0100151 PE=3 SV=1	930.362	788.511	865.5	348.048	294.505	350.444
FvH4_1g12350	4125.4	-1.37459	0.271327	-5.06619	4.05867e-07	5.48015e-06	gi|470102822|ref|XP_004287850.1|	PREDICTED: beta-galactosidase 3 [Fragaria vesca subsp. vesca]	BGAL3_ARATH	Beta-galactosidase 3 OS=Arabidopsis thaliana OX=3702 GN=BGAL3 PE=2 SV=1	AT4G36360.1	Beta-galactosidase OS=Rosa chinensis OX=74649 GN=RchiOBHm_Chr2g0100171 PE=3 SV=1	4127.35	4604.2	4040.8	1273.67	1769.15	1883.38
FvH4_1g12410	593.675	1.67799	0.462574	3.62752	0.000286161	0.00195674	-	-	SHI_ARATH	Protein SHORT INTERNODES OS=Arabidopsis thaliana OX=3702 GN=SHI PE=1 SV=1	AT5G66350.1	Putative transcription factor STY-LRP1 family OS=Rosa chinensis OX=74649 GN=RchiOBHm_Chr2g0100271 PE=4 SV=1	448.625	255.681	256.145	904.926	1193.91	973.456
FvH4_1g12461	104.341	1.3504	0.354811	3.80598	0.000141243	0.00105316	-	-	EPHA_MYCTU	Epoxide hydrolase A OS=Mycobacterium tuberculosis (strain ATCC 25618 / H37Rv) OX=83332 GN=ephA PE=1 SV=1	AT3G51000.1	Putative soluble epoxide hydrolase OS=Rosa chinensis OX=74649 GN=RchiOBHm_Chr2g0100331 PE=4 SV=1	75.8389	76.1187	86.2804	190.956	213.993	202.889
FvH4_1g12490	2628.04	2.36953	0.325057	7.28961	3.10863e-13	1.12318e-11	-	-	PER72_ARATH	Peroxidase 72 OS=Arabidopsis thaliana OX=3702 GN=PER72 PE=1 SV=1	AT5G66390.1	Peroxidase OS=Rosa chinensis OX=74649 GN=RchiOBHm_Chr2g0100381 PE=3 SV=1	1931.22	2211.35	1741.79	8242.16	9271.62	12894.7
FvH4_1g12582	5090.61	2.1979	0.364219	6.03457	1.59386e-09	3.29074e-08	-	-	DHN1_HORVU	Dehydrin DHN1 OS=Hordeum vulgare OX=4513 GN=DHN1 PE=2 SV=1	AT1G20450.1	Putative dehydrin OS=Rosa chinensis OX=74649 GN=RchiOBHm_Chr2g0100551 PE=3 SV=1	2146.99	4200.19	3118.68	17933	12213.5	13285.1
FvH4_1g12660	469.024	2.03527	0.316528	6.42997	1.27625e-10	3.12235e-09	-	-	-	-	-	Glycosyltransferase OS=Rosa chinensis OX=74649 GN=RchiOBHm_Chr2g0110741 PE=3 SV=1	66.2255	105.395	129.421	435.531	340.058	461.111
FvH4_1g12680	121	1.11465	0.450411	2.47475	0.0133331	0.048632	-	-	-	-	-	-	32.0446	63.4322	66.5078	112.881	123.946	114.765
FvH4_1g12690	197.783	1.36469	0.506147	2.69623	0.00701283	0.0287601	-	-	-	-	-	Putative ATPase, AAA-type, core, AAA-type ATPase domain-containing protein OS=Rosa chinensis OX=74649 GN=RchiOBHm_Chr2g0100651 PE=3 SV=1	17.0905	54.6493	14.3801	97.8298	54.028	69.6789
FvH4_1g12700	880.578	2.16402	0.26736	8.09402	5.77294e-16	2.86968e-14	-	-	-	-	-	Putative ATPase, AAA-type, core, AAA-type ATPase domain-containing protein OS=Rosa chinensis OX=74649 GN=RchiOBHm_Chr2g0100681 PE=3 SV=1	217.903	261.536	251.651	1047.91	1029.71	1199.91
FvH4_1g12716	818.209	1.28868	0.365546	3.52537	0.000422899	0.00276265	-	-	-	-	-	Putative ATPase, AAA-type, core, AAA-type ATPase domain-containing protein OS=Rosa chinensis OX=74649 GN=RchiOBHm_Chr2g0100731 PE=3 SV=1	666.528	803.15	674.964	1843.72	1215.1	2180.54
FvH4_1g12741	997.746	1.04617	0.23578	4.43703	9.12065e-06	9.39058e-05	gi|470102865|ref|XP_004287871.1|	PREDICTED: probable mitochondrial chaperone BCS1-B [Fragaria vesca subsp. vesca]	AATPI_ARATH	AAA-ATPase At5g17760 OS=Arabidopsis thaliana OX=3702 GN=At5g17760 PE=3 SV=1	AT5G17760.1	Putative ATPase, AAA-type, core, AAA-type ATPase domain-containing protein OS=Rosa chinensis OX=74649 GN=RchiOBHm_Chr2g0100821 PE=3 SV=1	542.622	704.586	693.838	1281.19	1043.48	1684.59
FvH4_1g12742	608.668	1.95192	0.508076	3.84178	0.000122145	0.000929101	gi|470102867|ref|XP_004287872.1|	PREDICTED: probable mitochondrial chaperone bcs1 [Fragaria vesca subsp. vesca]	HSR4_ARATH	Protein HYPER-SENSITIVITY-RELATED 4 OS=Arabidopsis thaliana OX=3702 GN=HSR4 PE=2 SV=1	-	Putative ATPase, AAA-type, core, AAA-type ATPase domain-containing protein OS=Rosa chinensis OX=74649 GN=RchiOBHm_Chr2g0100831 PE=3 SV=1	408.035	612.853	451.175	2525.7	1601.77	1567.78
FvH4_1g12770	608.38	1.15615	0.263086	4.39456	1.10999e-05	0.000112309	gi|470102872|ref|XP_004287874.1|	PREDICTED: probable caffeine synthase 2 [Fragaria vesca subsp. vesca]	TCS2_CAMSI	Probable caffeine synthase 2 OS=Camellia sinensis OX=4442 GN=TCS2 PE=2 SV=1	AT4G36470.1	Putative theobromine synthase OS=Rosa chinensis OX=74649 GN=RchiOBHm_Chr2g0100891 PE=4 SV=1	530.872	347.413	422.414	895.519	1038.18	964.233
FvH4_1g12870	26.2392	2.27465	0.874533	2.60099	0.00929555	0.0362728	gi|764512600|ref|XP_004289128.2|	PREDICTED: ankyrin repeat-containing protein At5g02620-like [Fragaria vesca subsp. vesca]	NPR4_ORYSJ	Ankyrin repeat-containing protein NPR4 OS=Oryza sativa subsp. japonica OX=39947 GN=NPR4 PE=2 SV=1	AT4G03500.3	Uncharacterized protein OS=Prunus persica OX=3760 GN=PRUPE_7G182300 PE=4 SV=1	4.27261	16.59	20.6713	55.4996	88.9872	57.3826
FvH4_1g12880	1059.92	-1.96308	0.239453	-8.19817	2.44074e-16	1.28705e-14	gi|470102876|ref|XP_004287876.1|	PREDICTED: GTPase Era, mitochondrial isoform X1 [Fragaria vesca subsp. vesca]	ERA_ARATH	GTPase ERA-like, chloroplastic OS=Arabidopsis thaliana OX=3702 GN=At5g66470 PE=2 SV=1	AT5G66470.2	Putative GTP-binding protein Era OS=Rosa chinensis OX=74649 GN=RchiOBHm_Chr2g0100961 PE=3 SV=1	1681.27	1410.15	1517.1	363.099	349.593	469.308
FvH4_1g13000	828.937	-1.53521	0.270495	-5.67557	1.38227e-08	2.45361e-07	gi|470102888|ref|XP_004287882.1|	PREDICTED: pheophytinase, chloroplastic [Fragaria vesca subsp. vesca]	PPH_ARATH	Pheophytinase, chloroplastic OS=Arabidopsis thaliana OX=3702 GN=PPH PE=1 SV=1	AT4G36530.2	Putative chlorophyllase OS=Rosa chinensis OX=74649 GN=RchiOBHm_Chr2g0101081 PE=4 SV=1	1286.06	895.858	1531.48	353.692	489.43	438.567
FvH4_1g13030	2157.23	-1.02612	0.210495	-4.87482	1.08908e-06	1.3477e-05	gi|470102886|ref|XP_004287881.1|	PREDICTED: putative glucose-6-phosphate 1-epimerase [Fragaria vesca subsp. vesca]	AAPC_CENCI	Putative glucose-6-phosphate 1-epimerase OS=Cenchrus ciliaris OX=35872 PE=2 SV=1	AT5G66530.3	Glucose-6-phosphate 1-epimerase OS=Rosa chinensis OX=74649 GN=RchiOBHm_Chr2g0101191 PE=3 SV=1	2705.63	2107.9	3099.8	1165.49	1413.2	1307.5
FvH4_1g13110	306.269	-3.95408	0.379377	-10.4226	1.95593e-25	3.18015e-23	gi|470102900|ref|XP_004287888.1|	PREDICTED: protein RADIALIS-like 4 [Fragaria vesca subsp. vesca]	RADL6_ARATH	Protein RADIALIS-like 6 OS=Arabidopsis thaliana OX=3702 GN=RL6 PE=2 SV=1	-	Putative transcription factor MYB/SANT family OS=Rosa chinensis OX=74649 GN=RchiOBHm_Chr2g0101281 PE=4 SV=1	275.584	380.593	575.203	39.5082	19.0687	20.4938
FvH4_1g13190	209.93	-3.29089	0.506857	-6.49274	8.42899e-11	2.11974e-09	gi|470102913|ref|XP_004287894.1|	PREDICTED: protein PHYLLO, chloroplastic-like [Fragaria vesca subsp. vesca]	-	-	-	Putative acylglycerol lipase OS=Rosa chinensis OX=74649 GN=RchiOBHm_Chr2g0101411 PE=4 SV=1	240.335	349.365	514.087	38.5675	46.6124	27.6666
FvH4_1g13300	800.891	1.18319	0.262639	4.50501	6.63683e-06	7.02478e-05	gi|470105543|ref|XP_004289142.1|	PREDICTED: pyridine nucleotide-disulfide oxidoreductase domain-containing protein 2 [Fragaria vesca subsp. vesca]	-	-	-	Putative amine oxidase, FAD/NAD(P)-binding domain-containing protein OS=Rosa chinensis OX=74649 GN=RchiOBHm_Chr2g0101541 PE=4 SV=1	616.325	655.792	683.053	1196.53	1940.77	1303.41
FvH4_1g13330	2660	1.33715	0.154124	8.67577	4.10772e-18	2.67894e-16	gi|470102925|ref|XP_004287900.1|	PREDICTED: random slug protein 5 [Fragaria vesca subsp. vesca]	PITC_DICDI	Phosphatidylinositol transfer protein 3 OS=Dictyostelium discoideum OX=44689 GN=pitC PE=2 SV=1	AT1G75170.2	Putative CRAL-TRIO lipid binding domain, CRAL/TRIO domain-containing protein OS=Rosa chinensis OX=74649 GN=RchiOBHm_Chr2g0101611 PE=4 SV=1	2345.67	2219.15	2099.49	5401.33	6881.68	4553.72
FvH4_1g13380	95.5884	1.8062	0.642225	2.81242	0.00491707	0.0215696	gi|470102930|ref|XP_004287901.1|	PREDICTED: uncharacterized protein LOC101303064 [Fragaria vesca subsp. vesca]	-	-	AT5G66780.1	Uncharacterized protein OS=Rosa chinensis OX=74649 GN=RchiOBHm_Chr2g0101741 PE=4 SV=1	26.7038	99.5398	57.5203	250.219	234.121	158.827
FvH4_1g13440	8792.74	-3.88155	0.339846	-11.4215	3.26535e-30	9.10138e-28	gi|470102940|ref|XP_004287906.1|	PREDICTED: uncharacterized protein LOC101304510 [Fragaria vesca subsp. vesca]	TAUE3_ARATH	Sulfite exporter TauE/SafE family protein 3 OS=Arabidopsis thaliana OX=3702 GN=At2g25737 PE=2 SV=1	AT2G25737.1	Putative transmembrane protein TauE OS=Rosa chinensis OX=74649 GN=RchiOBHm_Chr2g0101821 PE=4 SV=1	177.314	191.273	188.738	22.5761	4.23749	10.2469
FvH4_1g13510	1255.08	-2.89665	0.261072	-11.0952	1.32384e-28	2.98028e-26	-	-	-	-	AT3G50685.1	Uncharacterized protein OS=Rosa chinensis OX=74649 GN=RchiOBHm_Chr2g0101891 PE=4 SV=1	1823.34	1387.7	2079.72	246.456	175.856	287.938
FvH4_1g13550	16.5895	5.80603	1.56468	3.71069	0.000206693	0.00147226	-	-	-	-	AT4G33467.2	Uncharacterized protein OS=Rosa chinensis OX=74649 GN=RchiOBHm_Chr2g0101941 PE=4 SV=1	0	0	0	11.2881	14.8312	4.09876
FvH4_1g13710	2709.17	1.21296	0.189482	6.40148	1.53878e-10	3.71417e-09	-	-	-	-	-	Putative transcription factor C2H2 family OS=Rosa chinensis OX=74649 GN=RchiOBHm_Chr2g0102031 PE=4 SV=1	1474.05	1838.56	1842.45	4248.07	4065.87	3637.65
FvH4_1g13740	270.614	1.15392	0.346448	3.33071	0.000866235	0.00506396	-	-	-	-	-	Putative transcription factor GRAS family OS=Rosa chinensis OX=74649 GN=RchiOBHm_Chr2g0102171 PE=3 SV=1	405.898	226.404	195.928	609.555	436.461	795.16
FvH4_1g13790	74.5532	-2.26864	0.631513	-3.59238	0.00032767	0.00220441	-	-	RLP35_ARATH	Receptor-like protein 35 OS=Arabidopsis thaliana OX=3702 GN=RLP35 PE=3 SV=1	AT3G11080.2	Putative non-specific serine/threonine protein kinase OS=Rosa chinensis OX=74649 GN=RchiOBHm_Chr5g0010961 PE=4 SV=1	146.337	146.382	138.408	29.1608	26.4843	33.8148
FvH4_1g13800	133.378	-2.89399	0.410114	-7.05656	1.70676e-12	5.48154e-11	-	-	Y1571_ARATH	Probable leucine-rich repeat receptor-like protein kinase At1g35710 OS=Arabidopsis thaliana OX=3702 GN=At1g35710 PE=1 SV=1	AT1G35710.1	Uncharacterized protein OS=Rosa chinensis OX=74649 GN=RchiOBHm_Chr1g0336221 PE=3 SV=1	277.72	247.874	230.98	28.2201	25.4249	48.1604
FvH4_1g13810	217.356	-2.42619	0.624893	-3.88256	0.000103361	0.000803448	-	-	Y3475_ARATH	Probable LRR receptor-like serine/threonine-protein kinase At3g47570 OS=Arabidopsis thaliana OX=3702 GN=At3g47570 PE=2 SV=1	-	Uncharacterized protein OS=Rosa chinensis OX=74649 GN=RchiOBHm_Chr5g0011141 PE=4 SV=1	377.058	474.278	497.011	31.9828	87.9278	131.16
FvH4_1g13890	79.8994	2.50406	0.986443	2.53847	0.0111338	0.0420376	-	-	HT1_ARATH	Serine/threonine-protein kinase HT1 OS=Arabidopsis thaliana OX=3702 GN=HT1 PE=1 SV=1	AT5G66710.1	Putative dual-specificity kinase TKL-Pl-4 family OS=Rosa chinensis OX=74649 GN=RchiOBHm_Chr2g0102201 PE=4 SV=1	0	7.80704	0	11.2881	8.47497	24.5926
FvH4_1g13930	4086.49	2.38459	0.73361	3.25048	0.00115209	0.00647785	-	-	ATB40_ARATH	Homeobox-leucine zipper protein ATHB-40 OS=Arabidopsis thaliana OX=3702 GN=ATHB-40 PE=2 SV=3	AT4G36740.2	Putative transcription factor Homobox-WOX family OS=Rosa chinensis OX=74649 GN=RchiOBHm_Chr2g0102221 PE=4 SV=1	170.905	173.707	161.776	1017.81	1103.87	522.592
FvH4_1g13960	30394.7	-1.10986	0.175305	-6.33102	2.43538e-10	5.65109e-09	-	-	CAMT3_ARATH	Probable caffeoyl-CoA O-methyltransferase At4g26220 OS=Arabidopsis thaliana OX=3702 GN=At4g26220 PE=2 SV=1	AT4G26220.1	Putative methyltransferase OS=Rosa chinensis OX=74649 GN=RchiOBHm_Chr2g0092671 PE=4 SV=1	21777.5	25509.5	28228.1	10599.5	12420.1	11970.4
FvH4_1g14050	415.757	1.3939	0.320877	4.34404	1.39888e-05	0.000137613	-	-	-	-	AT4G36790.1	Putative major facilitator superfamily OS=Rosa chinensis OX=74649 GN=RchiOBHm_Chr2g0102651 PE=4 SV=1	301.219	411.822	411.629	1111.87	745.798	1098.47
FvH4_1g14170	1614.18	2.46522	0.436191	5.65169	1.58879e-08	2.78223e-07	-	-	-	-	-	Putative EF-hand domain pair protein OS=Rosa chinensis OX=74649 GN=RchiOBHm_Chr2g0102831 PE=4 SV=1	337.537	578.697	382.869	2722.3	3652.71	799.258
FvH4_1g14181	127.175	1.14436	0.441439	2.59234	0.00953248	0.037	-	-	-	-	-	Putative cold-regulated 413 protein OS=Rosa chinensis OX=74649 GN=RchiOBHm_Chr2g0102851 PE=4 SV=1	43.7943	36.1076	26.0639	43.2709	96.4028	94.2715
FvH4_1g14252	98.9264	-1.02508	0.377903	-2.71254	0.0066769	0.0276195	-	-	-	-	-	Putative cold-regulated 413 protein OS=Rosa chinensis OX=74649 GN=RchiOBHm_Chr2g0102851 PE=4 SV=1	72.6345	102.467	137.509	57.3809	29.6624	66.6049
FvH4_1g14300	29.6697	3.05646	1.08276	2.82284	0.00476007	0.0210052	gi|764593264|ref|XP_011465459.1|	PREDICTED: probable serine/threonine-protein kinase Cx32, chloroplastic isoform X2 [Fragaria vesca subsp. vesca]	CST_ARATH	Probable serine/threonine-protein kinase CST OS=Arabidopsis thaliana OX=3702 GN=CST PE=1 SV=2	AT4G35600.2	Putative transferase, protein kinase RLK-Pelle-RLCK-VIIa-2 family OS=Rosa chinensis OX=74649 GN=RchiOBHm_Chr2g0102961 PE=4 SV=1	12.8178	11.7106	1.79751	90.3044	82.631	45.0864
FvH4_1g14430	90427.7	-2.39512	0.258848	-9.25298	2.18318e-20	1.88616e-18	gi|470129332|ref|XP_004300575.1|	PREDICTED: oxygen-evolving enhancer protein 1, chloroplastic [Fragaria vesca subsp. vesca]	PSBO_TOBAC	Oxygen-evolving enhancer protein 1, chloroplastic OS=Nicotiana tabacum OX=4097 GN=PSBO PE=2 SV=1	AT5G66570.1	Putative outer membrane protein/outer membrane enzyme PagP, beta-barrel OS=Rosa chinensis OX=74649 GN=RchiOBHm_Chr2g0103161 PE=4 SV=1	120286	108007	136840	23125.5	21761.6	24527
FvH4_1g14510	632.777	-1.56273	0.502069	-3.11259	0.00185455	0.0096705	gi|470131993|ref|XP_004301872.1|	PREDICTED: uncharacterized protein LOC101306056 [Fragaria vesca subsp. vesca]	-	-	AT2G23670.1	Uncharacterized protein OS=Rosa chinensis OX=74649 GN=RchiOBHm_Chr2g0103251 PE=4 SV=1	514.85	523.072	546.443	69.6097	309.337	157.802
FvH4_1g14540	1193.05	1.32083	0.150771	8.76053	1.94339e-18	1.32269e-16	gi|470129323|ref|XP_004300571.1|	PREDICTED: wall-associated receptor kinase-like 14 [Fragaria vesca subsp. vesca]	WAKLO_ARATH	Wall-associated receptor kinase-like 14 OS=Arabidopsis thaliana OX=3702 GN=WAKL14 PE=2 SV=2	AT2G23450.2	Uncharacterized protein OS=Rosa chinensis OX=74649 GN=RchiOBHm_Chr2g0103291 PE=4 SV=1	873.75	981.736	931.109	2776.86	1972.55	2211.28
FvH4_1g14620	1237.36	-1.12878	0.251114	-4.4951	6.95385e-06	7.3272e-05	gi|764593123|ref|XP_004300566.2|	PREDICTED: uncharacterized protein LOC101310520 [Fragaria vesca subsp. vesca]	-	-	-	Putative transcription factor B3-Domain family OS=Rosa chinensis OX=74649 GN=RchiOBHm_Chr2g0103391 PE=4 SV=1	862	761.187	838.538	342.404	295.565	487.752
FvH4_1g14630	283.039	-1.69588	0.518439	-3.27113	0.0010712	0.00609036	gi|470131983|ref|XP_004301867.1|	PREDICTED: B3 domain-containing transcription factor VRN1-like isoform X1 [Fragaria vesca subsp. vesca]	-	-	-	Putative transcription factor B3-Domain family OS=Rosa chinensis OX=74649 GN=RchiOBHm_Chr2g0103401 PE=4 SV=1	56.6121	25.3729	30.5576	5.64403	16.9499	12.2963
FvH4_1g14660	197.17	-1.91278	0.486732	-3.92985	8.49978e-05	0.000675052	gi|764595393|ref|XP_011465844.1|	PREDICTED: B3 domain-containing transcription factor VRN1-like [Fragaria vesca subsp. vesca]	-	-	-	Putative transcription factor B3-Domain family OS=Rosa chinensis OX=74649 GN=RchiOBHm_Chr2g0103441 PE=4 SV=1	126.042	70.2634	37.7477	22.5761	10.5937	28.6913
FvH4_1g14670	288.43	-2.76533	0.738243	-3.74582	0.000179805	0.00130819	gi|764593087|ref|XP_011465438.1|	PREDICTED: B3 domain-containing transcription factor VRN1-like [Fragaria vesca subsp. vesca]	-	-	-	Putative transcription factor B3-Domain family OS=Rosa chinensis OX=74649 GN=RchiOBHm_Chr2g0103521 PE=4 SV=1	781.889	462.567	471.846	52.6776	158.906	40.9876
FvH4_1g14710	1152.57	-2.24264	0.291079	-7.70459	1.31268e-14	5.61859e-13	gi|470129309|ref|XP_004300565.1|	PREDICTED: B3 domain-containing protein At3g18960-like [Fragaria vesca subsp. vesca]	Y3896_ARATH	B3 domain-containing protein At3g18960 OS=Arabidopsis thaliana OX=3702 GN=At3g18960 PE=1 SV=1	-	Putative transcription factor B3-Domain family OS=Rosa chinensis OX=74649 GN=RchiOBHm_Chr2g0103571 PE=4 SV=1	318.31	292.764	258.841	79.9571	59.3248	44.0617
FvH4_1g14780	1332.92	-2.14034	0.804373	-2.66088	0.00779368	0.0313475	gi|470129300|ref|XP_004300561.1|	PREDICTED: GDSL esterase/lipase At2g23540 [Fragaria vesca subsp. vesca]	GDL38_ARATH	GDSL esterase/lipase At2g23540 OS=Arabidopsis thaliana OX=3702 GN=At2g23540 PE=2 SV=1	AT2G23540.1	Putative triacylglycerol lipase OS=Rosa chinensis OX=74649 GN=RchiOBHm_Chr2g0103741 PE=3 SV=1	2117.08	4950.64	4519.83	865.418	1017	745.974
FvH4_1g14860	393.172	-2.45806	0.546755	-4.49572	6.93354e-06	7.3091e-05	gi|764593027|ref|XP_004301856.2|	PREDICTED: probable esterase PIR7A [Fragaria vesca subsp. vesca]	MES8_ARATH	Methylesterase 8 OS=Arabidopsis thaliana OX=3702 GN=MES8 PE=3 SV=1	AT2G23590.1	Putative 3-oxolaurate decarboxylase OS=Rosa chinensis OX=74649 GN=RchiOBHm_Chr1g0329921 PE=4 SV=1	514.85	524.048	641.71	107.237	120.768	77.8764
FvH4_1g14890	222.091	-1.17635	0.416518	-2.82426	0.00473901	0.0209269	-	-	-	-	-	-	337.537	402.063	442.187	126.05	239.418	157.802
FvH4_1g14940	107.858	-1.31834	0.386664	-3.40951	0.000650791	0.00397013	-	-	MES1_ARATH	Methylesterase 1 OS=Arabidopsis thaliana OX=3702 GN=MES1 PE=1 SV=1	AT2G23620.1	Putative 3-oxolaurate decarboxylase OS=Rosa chinensis OX=74649 GN=RchiOBHm_Chr2g0103951 PE=4 SV=1	138.86	153.213	158.181	64.9063	57.2061	58.4073
FvH4_1g14950	73.3887	-3.66924	0.794785	-4.61664	3.89995e-06	4.32747e-05	-	-	MES10_ARATH	Methylesterase 10 OS=Arabidopsis thaliana OX=3702 GN=MES10 PE=2 SV=1	AT3G50440.1	Putative carboxylesterase OS=Rosa chinensis OX=74649 GN=RchiOBHm_Chr2g0104001 PE=4 SV=1	121.77	115.154	158.181	9.40671	3.17811	18.4444
FvH4_1g15090	605.715	1.43487	0.308624	4.64925	3.33148e-06	3.7518e-05	-	-	-	-	-	Putative powdery mildew resistance protein, RPW8 OS=Rosa chinensis OX=74649 GN=RchiOBHm_Chr2g0104151 PE=3 SV=1	397.353	544.541	470.947	1418.53	1243.7	1157.9
FvH4_1g15170	13.2982	5.25929	1.60502	3.27677	0.00105001	0.00597917	-	-	-	-	-	Putative powdery mildew resistance protein, RPW8 OS=Rosa chinensis OX=74649 GN=RchiOBHm_Chr3g0480561 PE=3 SV=1	0	3.90352	0	95.9485	43.4342	10.2469
FvH4_1g15230	38.9377	3.49012	1.12033	3.11527	0.0018378	0.00959596	-	-	DRL42_ARATH	Probable disease resistance protein At5g66900 OS=Arabidopsis thaliana OX=3702 GN=At5g66900 PE=3 SV=1	-	Putative powdery mildew resistance protein, RPW8 OS=Rosa chinensis OX=74649 GN=RchiOBHm_Chr3g0480561 PE=3 SV=1	2.13631	8.78292	32.3552	206.007	140.896	141.407
FvH4_1g15240	823.45	1.00712	0.263226	3.82606	0.000130209	0.00098405	gi|470103287|ref|XP_004288073.1|	PREDICTED: probable disease resistance protein At5g66900 [Fragaria vesca subsp. vesca]	DRL42_ARATH	Probable disease resistance protein At5g66900 OS=Arabidopsis thaliana OX=3702 GN=At5g66900 PE=3 SV=1	AT5G66900.1	Putative powdery mildew resistance protein, RPW8 OS=Rosa chinensis OX=74649 GN=RchiOBHm_Chr4g0411541 PE=3 SV=1	523.395	776.801	754.954	1525.77	1029.71	1575.97
FvH4_1g15260	431.459	-2.15856	0.331297	-6.51549	7.24543e-11	1.83392e-09	gi|764514577|ref|XP_004288072.2|	PREDICTED: salicylic acid-binding protein 2-like [Fragaria vesca subsp. vesca]	SABP2_TOBAC	Salicylic acid-binding protein 2 OS=Nicotiana tabacum OX=4097 GN=SABP2 PE=1 SV=1	AT2G23620.1	Putative 3-oxolaurate decarboxylase OS=Rosa chinensis OX=74649 GN=RchiOBHm_Chr2g0104521 PE=4 SV=1	254.221	300.571	354.109	60.203	65.681	77.8764
FvH4_1g15351	218.459	1.05555	0.29768	3.54592	0.00039124	0.00257813	-	-	POLR1_ARATH	Retrovirus-related Pol polyprotein from transposon RE1 OS=Arabidopsis thaliana OX=3702 GN=RE1 PE=2 SV=1	AT5G48050.1	Putative RNA-directed DNA polymerase OS=Rosa chinensis OX=74649 GN=RchiOBHm_Chr7g0234441 PE=4 SV=1	164.496	150.286	118.636	346.167	257.427	296.135
FvH4_1g15430	28.2389	3.05624	1.00218	3.04958	0.00229161	0.0115062	-	-	CST_ARATH	Probable serine/threonine-protein kinase CST OS=Arabidopsis thaliana OX=3702 GN=CST PE=1 SV=2	AT4G35600.2	Putative transferase, protein kinase RLK-Pelle-RLCK-VIIa-2 family OS=Rosa chinensis OX=74649 GN=RchiOBHm_Chr2g0104621 PE=4 SV=1	14.9542	15.6141	7.19003	103.474	93.2247	116.815
FvH4_1g15530	92.135	1.52141	0.604196	2.51807	0.0117999	0.0440834	-	-	-	-	-	Putative mitogen-activated protein kinase kinase kinase STE-STE11 family OS=Rosa chinensis OX=74649 GN=RchiOBHm_Chr2g0104811 PE=4 SV=1	143.133	68.3116	59.3178	301.015	246.834	228.506
FvH4_1g15680	618.871	-1.68135	0.257475	-6.53012	6.57172e-11	1.6688e-09	gi|470103249|ref|XP_004288055.1|	PREDICTED: 3-ketodihydrosphingosine reductase [Fragaria vesca subsp. vesca]	KDSR_BOVIN	3-ketodihydrosphingosine reductase OS=Bos taurus OX=9913 GN=KDSR PE=2 SV=1	AT3G50560.1	Putative 3-dehydrosphinganine reductase OS=Rosa chinensis OX=74649 GN=RchiOBHm_Chr2g0104991 PE=4 SV=1	773.343	958.315	810.676	269.032	216.112	307.407
FvH4_1g15700	2051.99	-1.01956	0.208109	-4.89914	9.62573e-07	1.20646e-05	gi|764514314|ref|XP_011464259.1|	PREDICTED: uncharacterized protein LOC101295278 isoform X3 [Fragaria vesca subsp. vesca]	-	-	AT4G37080.3	Putative ternary complex factor MIP1, leucine-zipper OS=Rosa chinensis OX=74649 GN=RchiOBHm_Chr2g0105011 PE=4 SV=1	2087.17	2012.27	2441.02	1055.43	1086.92	1084.12
FvH4_1g15720	5.89981	-5.08488	2.0263	-2.50944	0.0120921	0.0449672	gi|1365956177|ref|XP_024177897.1|	precursor of CEP7 [Rosa chinensis]	PCEP8_ARATH	Precursor of CEP8 OS=Arabidopsis thaliana OX=3702 GN=CEP8 PE=2 SV=1	AT5G66816.1	Uncharacterized protein OS=Ricinus communis OX=3988 GN=RCOM_0601250 PE=4 SV=1	4.27261	1.95176	12.5826	0	0	0
FvH4_1g15800	11.26	6.13824	1.50793	4.07063	4.68864e-05	0.000398313	gi|470103239|ref|XP_004288050.1|	PREDICTED: patatin-like protein 1 [Fragaria vesca subsp. vesca]	PLP1_ARATH	Patatin-like protein 1 OS=Arabidopsis thaliana OX=3702 GN=PLP1 PE=1 SV=2	AT4G37070.2	Patatin OS=Rosa chinensis OX=74649 GN=RchiOBHm_Chr2g0105081 PE=3 SV=1	0	0	0	15.0507	12.7125	10.2469
FvH4_1g15810	1376.07	-1.00241	0.150679	-6.65266	2.8785e-11	7.77328e-10	gi|470103235|ref|XP_004288048.1|	PREDICTED: methionine aminopeptidase 1D, chloroplastic/mitochondrial isoform X1 [Fragaria vesca subsp. vesca]	MAP1D_ARATH	Methionine aminopeptidase 1D, chloroplastic/mitochondrial OS=Arabidopsis thaliana OX=3702 GN=MAP1D PE=1 SV=1	AT4G37040.1	Methionine aminopeptidase OS=Rosa chinensis OX=74649 GN=RchiOBHm_Chr2g0105091 PE=3 SV=1	1826.54	1603.37	1633.94	846.604	887.753	793.11
FvH4_1g16030	2184.74	1.59534	0.418571	3.81139	0.000138186	0.00103564	gi|470103211|ref|XP_004288037.1|	PREDICTED: heat shock factor protein HSF24 [Fragaria vesca subsp. vesca]	-	-	-	Heat shock factor B1a OS=Fragaria vesca OX=57918 PE=2 SV=1	1091.65	2265.99	1648.32	5215.08	6735.48	3176.54
FvH4_1g16070	815.215	3.17684	0.298636	10.6378	1.98675e-26	3.57814e-24	gi|470103205|ref|XP_004288034.1|	PREDICTED: uncharacterized protein LOC101294009 [Fragaria vesca subsp. vesca]	-	-	-	Uncharacterized protein OS=Rosa chinensis OX=74649 GN=RchiOBHm_Chr2g0105691 PE=4 SV=1	299.083	275.198	352.312	3155.01	2098.62	3127.35
FvH4_1g16102	84.5926	8.52871	1.28711	6.62627	3.44282e-11	9.1912e-10	gi|764514075|ref|XP_004289216.2|	PREDICTED: uncharacterized protein LOC101315095 isoform X3 [Fragaria vesca subsp. vesca]	-	-	-	Uncharacterized protein (Fragment) OS=Citrus clementina OX=85681 GN=CICLE_v10026965mg PE=4 SV=1	0	0	0	52.6776	38.1374	108.617
FvH4_1g16150	211.358	2.19014	0.417965	5.24	1.6058e-07	2.33446e-06	gi|764514042|ref|XP_011464054.1|	PREDICTED: mitogen-activated protein kinase kinase kinase NPK1 [Fragaria vesca subsp. vesca]	M3K17_ARATH	Mitogen-activated protein kinase kinase kinase 17 OS=Arabidopsis thaliana OX=3702 GN=MAPKKK17 PE=1 SV=1	AT5G67080.1	Putative mitogen-activated protein kinase kinase kinase STE-STE11 family OS=Rosa chinensis OX=74649 GN=RchiOBHm_Chr2g0105831 PE=3 SV=1	119.633	136.623	134.813	656.589	663.167	465.209
FvH4_1g16230	936.832	-2.00459	0.317669	-6.31033	2.78443e-10	6.4102e-09	-	-	SPT_ARATH	Transcription factor SPATULA OS=Arabidopsis thaliana OX=3702 GN=SPT PE=1 SV=1	AT4G36930.1	Putative transcription factor bHLH family OS=Rosa chinensis OX=74649 GN=RchiOBHm_Chr2g0105931 PE=4 SV=1	474.26	540.638	524.872	75.2537	177.974	131.16
FvH4_1g16370	225.871	1.28366	0.461883	2.77919	0.00544944	0.0234321	-	-	-	-	-	AP2 domain class transcription factor OS=Malus domestica OX=3750 GN=AP2D45 PE=2 SV=1	117.497	179.562	140.206	344.286	508.498	212.111
FvH4_1g16440	2971.18	-1.13988	0.360955	-3.15797	0.00158873	0.00849829	-	-	IX15L_ARATH	Protein IRX15-LIKE OS=Arabidopsis thaliana OX=3702 GN=IRX15-L PE=2 SV=1	AT5G67210.1	Protein IRX15-LIKE OS=Prunus yedoensis var. nudiflora OX=2094558 GN=Pyn_04340 PE=4 SV=1	816.069	893.907	826.854	434.59	415.274	301.259
FvH4_1g16480	2086.07	1.03279	0.184267	5.60488	2.08397e-08	3.58239e-07	gi|470103149|ref|XP_004288006.1|	PREDICTED: probable WRKY transcription factor 15 [Fragaria vesca subsp. vesca]	WRK15_ARATH	Probable WRKY transcription factor 15 OS=Arabidopsis thaliana OX=3702 GN=WRKY15 PE=2 SV=1	AT2G23320.1	Putative transcription factor WRKY family OS=Rosa chinensis OX=74649 GN=RchiOBHm_Chr2g0106361 PE=4 SV=1	1948.31	2133.27	1750.77	3982.8	4192.99	3756.51
FvH4_1g16610	23.2493	-4.32355	1.64542	-2.62762	0.00859847	0.0339373	-	-	WRK19_ARATH	Probable WRKY transcription factor 19 OS=Arabidopsis thaliana OX=3702 GN=WRKY19 PE=3 SV=1	AT4G12020.8	Putative toll-like receptor, P-loop containing nucleoside triphosphate hydrolase OS=Rosa chinensis OX=74649 GN=RchiOBHm_Chr2g0106511 PE=4 SV=1	0	1.95176	8.98754	0	0	0
FvH4_1g16680	1014.39	-1.13584	0.281448	-4.03569	5.44419e-05	0.000453128	-	-	CCD32_ARATH	Cyclin-D3-2 OS=Arabidopsis thaliana OX=3702 GN=CYCD3-2 PE=1 SV=1	AT5G67260.1	Putative cyclin OS=Rosa chinensis OX=74649 GN=RchiOBHm_Chr2g0106601 PE=3 SV=1	1138.65	724.103	787.309	366.862	464.005	375.037
FvH4_1g16750	1478.7	1.2754	0.30443	4.18948	2.79593e-05	0.000253725	-	-	Y4372_ARATH	Probable LRR receptor-like serine/threonine-protein kinase At4g37250 OS=Arabidopsis thaliana OX=3702 GN=At4g37250 PE=1 SV=1	AT4G37250.1	Uncharacterized protein OS=Rosa chinensis OX=74649 GN=RchiOBHm_Chr2g0106651 PE=4 SV=1	1369.37	1176.91	1065.92	2797.56	2325.32	3620.23
FvH4_1g16770	2507.35	1.03514	0.242628	4.26634	1.98704e-05	0.000187063	-	-	MYB73_ARATH	Transcription factor MYB73 OS=Arabidopsis thaliana OX=3702 GN=MYB73 PE=1 SV=1	AT4G37260.1	Putative transcription factor MYB-HB-like family OS=Rosa chinensis OX=74649 GN=RchiOBHm_Chr2g0106671 PE=4 SV=1	1704.77	1594.59	1562.03	3768.33	3137.86	3055.63
FvH4_1g16830	29.1684	5.73786	1.82762	3.13953	0.0016922	0.00897179	-	-	-	-	-	Uncharacterized protein OS=Rosa chinensis OX=74649 GN=RchiOBHm_Chr1g0340091 PE=4 SV=1	0	7.80704	0	101.592	305.099	10.2469
FvH4_1g16970	595.84	-1.85036	0.274797	-6.73353	1.6559e-11	4.61608e-10	-	-	-	-	-	Putative transcription factor C2H2 family OS=Rosa chinensis OX=74649 GN=RchiOBHm_Chr2g0107071 PE=4 SV=1	1004.06	837.305	841.234	270.913	230.943	241.827
FvH4_1g16980	843.977	5.11507	0.428007	11.9509	6.42355e-33	2.38721e-30	-	-	-	-	-	Uncharacterized protein OS=Prunus persica OX=3760 GN=PRUPE_6G226100 PE=4 SV=1	123.906	121.009	140.206	4859.51	3866.71	4623.4
FvH4_1g17000	2985.37	1.3687	0.178862	7.65227	1.97459e-14	8.24084e-13	gi|470103094|ref|XP_004287980.1|	PREDICTED: metal transporter Nramp3 [Fragaria vesca subsp. vesca]	NRAM3_ARATH	Metal transporter Nramp3 OS=Arabidopsis thaliana OX=3702 GN=NRAMP3 PE=1 SV=2	AT2G23150.1	Putative NRAMP family protein OS=Rosa chinensis OX=74649 GN=RchiOBHm_Chr2g0107161 PE=3 SV=1	1756.04	1497	1589	4829.41	3343.38	4329.32
FvH4_1g17020	116.147	1.80386	0.675845	2.66905	0.00760665	0.0307112	gi|764513567|ref|XP_004289183.2|	PREDICTED: cyclic nucleotide-gated ion channel 1-like [Fragaria vesca subsp. vesca]	CNGC1_ARATH	Cyclic nucleotide-gated ion channel 1 OS=Arabidopsis thaliana OX=3702 GN=CNGC1 PE=1 SV=1	AT5G53130.1	cyclic nucleotide-gated ion channel 1-like OS=Juglans regia OX=51240 GN=LOC108981770 PE=4 SV=1	98.2701	139.551	83.5841	462.81	512.736	146.531
FvH4_1g17060	2762.52	-2.30561	0.352128	-6.54764	5.84515e-11	1.49402e-09	gi|470103088|ref|XP_004287977.1|	PREDICTED: uncharacterized protein LOC101301813 [Fragaria vesca subsp. vesca]	DDB2_MOUSE	DNA damage-binding protein 2 OS=Mus musculus OX=10090 GN=Ddb2 PE=1 SV=1	AT4G34280.1	Putative transcription factor WD40-like family OS=Rosa chinensis OX=74649 GN=RchiOBHm_Chr2g0107231 PE=4 SV=1	3200.19	3189.18	3470.99	658.47	557.229	778.764
FvH4_1g17270	1871.94	-1.40452	0.218533	-6.42703	1.30122e-10	3.1801e-09	gi|470104131|ref|XP_004288468.1|	PREDICTED: uncharacterized protein LOC101307831 [Fragaria vesca subsp. vesca]	RNC1_ARATH	Ribonuclease III domain-containing protein RNC1, chloroplastic OS=Arabidopsis thaliana OX=3702 GN=RNC1 PE=2 SV=1	AT4G37510.1	Putative ribonuclease III OS=Rosa chinensis OX=74649 GN=RchiOBHm_Chr2g0107461 PE=4 SV=1	3091.24	2415.3	2130.05	1042.26	759.569	1082.07
FvH4_1g17370	134.79	-1.87507	0.482979	-3.88231	0.000103471	0.000804035	gi|764611092|ref|XP_004303852.2|	PREDICTED: scarecrow-like protein 32 [Fragaria vesca subsp. vesca]	-	-	-	Putative transcription factor GRAS family OS=Rosa chinensis OX=74649 GN=RchiOBHm_Chr2g0107531 PE=3 SV=1	253.152	242.994	253.449	65.847	33.8999	104.518
FvH4_1g17420	280.507	1.42932	0.364488	3.92144	8.80199e-05	0.000695046	gi|470103635|ref|XP_004288237.1|	PREDICTED: probable N-acetyltransferase HLS1 [Fragaria vesca subsp. vesca]	-	-	-	Putative transcription regulator GNAT family OS=Rosa chinensis OX=74649 GN=RchiOBHm_Chr2g0107611 PE=4 SV=1	335.4	345.462	244.461	837.197	887.753	766.468
FvH4_1g17460	9.99813	-6.25502	1.86957	-3.34569	0.000820779	0.00484175	gi|764516561|ref|XP_011465960.1|	PREDICTED: LOW QUALITY PROTEIN: cytochrome P450 CYP82D47-like [Fragaria vesca subsp. vesca]	-	-	-	Putative cytochrome P450 OS=Rosa chinensis OX=74649 GN=RchiOBHm_Chr2g0107691 PE=3 SV=1	4.27261	3.90352	34.1527	0	0	0
FvH4_1g17510	2340.43	-1.69284	0.193805	-8.73476	2.44183e-18	1.62879e-16	gi|470103643|ref|XP_004288241.1|	PREDICTED: BTB/POZ and TAZ domain-containing protein 4 [Fragaria vesca subsp. vesca]	BT4_ARATH	BTB/POZ and TAZ domain-containing protein 4 OS=Arabidopsis thaliana OX=3702 GN=BT4 PE=1 SV=1	AT5G67480.2	Putative histone acetyltransferase OS=Rosa chinensis OX=74649 GN=RchiOBHm_Chr2g0107741 PE=4 SV=1	1318.1	1720.48	1813.69	442.116	565.704	493.901
FvH4_1g17520	48.182	1.51447	0.573929	2.63878	0.00832055	0.0331195	gi|470105957|ref|XP_004289344.1|	PREDICTED: uncharacterized protein LOC101314894 isoform X2 [Fragaria vesca subsp. vesca]	-	-	AT5G47580.1	Uncharacterized protein OS=Rosa chinensis OX=74649 GN=RchiOBHm_Chr7g0202971 PE=4 SV=1	51.2714	56.6011	64.7103	165.558	118.65	209.037
FvH4_1g17530	463.872	-2.13669	0.298383	-7.16089	8.01533e-13	2.71975e-11	gi|470105961|ref|XP_004289346.1|	PREDICTED: cyclin-D5-1 [Fragaria vesca subsp. vesca]	CCD51_ARATH	Cyclin-D5-1 OS=Arabidopsis thaliana OX=3702 GN=CYCD5-1 PE=2 SV=2	AT4G37630.1	Putative cyclin OS=Rosa chinensis OX=74649 GN=RchiOBHm_Chr2g0107771 PE=3 SV=1	679.346	706.537	483.53	150.507	116.531	157.802
FvH4_1g17620	577.305	1.25514	0.482635	2.6006	0.00930621	0.0362962	-	-	ACA2_ARATH	Calcium-transporting ATPase 2, plasma membrane-type OS=Arabidopsis thaliana OX=3702 GN=ACA2 PE=1 SV=1	AT4G37640.1	Calcium-transporting ATPase OS=Prunus persica OX=3760 GN=PRUPE_6G221800 PE=3 SV=1	212.563	364.003	163.573	592.623	516.973	656.826
FvH4_1g17640	6423.14	1.03452	0.400732	2.58158	0.00983487	0.0379347	-	-	RL261_ARATH	60S ribosomal protein L26-1 OS=Arabidopsis thaliana OX=3702 GN=RPL26A PE=2 SV=2	AT3G49910.1	Putative translation protein SH3 OS=Rosa chinensis OX=74649 GN=RchiOBHm_Chr2g0107961 PE=3 SV=1	4622.97	5386.86	4465.91	8102	14728.4	6822.39
FvH4_1g17650	588.24	-2.14076	0.356165	-6.01059	1.84846e-09	3.793e-08	-	-	Y3990_ARATH	BTB/POZ domain-containing protein At3g49900 OS=Arabidopsis thaliana OX=3702 GN=At3g49900 PE=3 SV=1	AT3G49900.1	Putative SKP1/BTB/POZ domain, NPH3 domain-containing protein OS=Rosa chinensis OX=74649 GN=RchiOBHm_Chr2g0107971 PE=3 SV=1	339.673	325.944	309.171	45.1522	59.3248	116.815
FvH4_1g17750	67.1126	-1.37101	0.514337	-2.66559	0.00768544	0.0309653	-	-	-	-	-	Uncharacterized protein OS=Rosa chinensis OX=74649 GN=RchiOBHm_Chr2g0108061 PE=4 SV=1	130.315	72.2152	128.522	26.3388	42.3749	59.432
FvH4_1g17840	2476.07	1.15339	0.235908	4.88915	1.01273e-06	1.26055e-05	-	-	-	-	-	Uncharacterized protein OS=Rosa chinensis OX=74649 GN=RchiOBHm_Chr2g0108271 PE=4 SV=1	1937.63	2295.27	1803.8	4361.89	5051.08	4014.74
FvH4_1g17910	353.224	2.16386	0.451088	4.79699	1.6107e-06	1.92503e-05	-	-	-	-	-	Uncharacterized protein OS=Prunus persica OX=3760 GN=PRUPE_6G219300 PE=4 SV=1	106.815	116.13	88.0779	437.412	466.124	489.802
FvH4_1g18070	208.787	1.78413	0.536494	3.32553	0.00088251	0.0051373	-	-	ACR1_ARATH	ACT domain-containing protein ACR1 OS=Arabidopsis thaliana OX=3702 GN=ACR1 PE=2 SV=1	AT5G65890.4	Putative [Protein-PII] uridylyltransferase OS=Rosa chinensis OX=74649 GN=RchiOBHm_Chr2g0108541 PE=4 SV=1	140.996	206.887	195.928	758.181	791.351	323.802
FvH4_1g18100	195.432	1.6461	0.65342	2.5192	0.0117621	0.0439562	-	-	PSK_ASPOF	Phytosulfokines OS=Asparagus officinalis OX=4686 GN=PSK PE=1 SV=1	AT3G49780.1	Putative phytosulfokine OS=Rosa chinensis OX=74649 GN=RchiOBHm_Chr2g0108571 PE=4 SV=1	126.042	167.851	213.005	454.344	669.523	463.16
FvH4_1g18220	532.177	-1.05723	0.410212	-2.57727	0.00995829	0.0383224	-	-	GRF1_ARATH	Growth-regulating factor 1 OS=Arabidopsis thaliana OX=3702 GN=GRF1 PE=1 SV=1	-	Putative transcription factor interactor and regulator C3H-WRC/GRF family OS=Rosa chinensis OX=74649 GN=RchiOBHm_Chr2g0108741 PE=4 SV=1	1038.25	975.881	810.676	440.234	536.042	381.185
FvH4_1g18230	505.994	-1.39467	0.361311	-3.86002	0.000113376	0.00086918	-	-	-	-	-	Putative thioredoxin-like, peroxiredoxin-like FAM213/AAED1 OS=Rosa chinensis OX=74649 GN=RchiOBHm_Chr2g0108751 PE=4 SV=1	718.867	548.445	672.268	255.863	320.99	160.876
FvH4_1g18251	1141.53	-1.17157	0.220576	-5.31142	1.08775e-07	1.62524e-06	-	-	-	-	-	Thioredoxin-like protein AAED1 chloroplastic OS=Prunus yedoensis var. nudiflora OX=2094558 GN=Pyn_09097 PE=4 SV=1	1240.13	1205.21	1434.41	539.945	537.101	645.555
FvH4_1g18280	525.046	1.04865	0.315256	3.32633	0.00087998	0.00512906	-	-	-	-	-	Putative transferase OS=Rosa chinensis OX=74649 GN=RchiOBHm_Chr2g0108871 PE=4 SV=1	284.129	304.475	355.907	649.063	427.986	877.135
FvH4_1g18300	2016.87	-1.46378	0.239269	-6.11773	9.4919e-10	2.01847e-08	-	-	-	-	-	Putative squalene monooxygenase OS=Rosa chinensis OX=74649 GN=RchiOBHm_Chr2g0108881 PE=4 SV=1	1717.59	2065.94	2255.87	609.555	603.842	976.53
FvH4_1g18490	371.101	4.04906	0.863812	4.68743	2.76651e-06	3.16425e-05	gi|470103732|ref|XP_004288284.1|	PREDICTED: 1-aminocyclopropane-1-carboxylate synthase [Fragaria vesca subsp. vesca]	1A1C_MALDO	1-aminocyclopropane-1-carboxylate synthase OS=Malus domestica OX=3750 GN=ACS-1 PE=1 SV=2	AT3G49700.1	1-aminocyclopropane-1-carboxylate synthase OS=Rosa chinensis OX=74649 GN=RchiOBHm_Chr2g0109121 PE=4 SV=1	115.361	169.803	76.3941	2069.48	1422.74	2492.05
FvH4_1g18640	13.3057	5.90904	1.80011	3.28259	0.00102858	0.00586797	gi|764517134|ref|XP_011466465.1|	PREDICTED: uncharacterized protein LOC105352100 [Fragaria vesca subsp. vesca]	-	-	AT5G67020.1	Uncharacterized protein OS=Rosa chinensis OX=74649 GN=RchiOBHm_Chr2g0109461 PE=4 SV=1	0	0	3.59502	65.847	86.8685	68.6542
FvH4_1g18670	688.813	1.54954	0.291788	5.31049	1.09328e-07	1.63246e-06	gi|470103760|ref|XP_004288298.1|	PREDICTED: LRR receptor-like serine/threonine-protein kinase HSL2 [Fragaria vesca subsp. vesca]	HSL2_ARATH	LRR receptor-like serine/threonine-protein kinase HSL2 OS=Arabidopsis thaliana OX=3702 GN=HSL2 PE=1 SV=1	AT5G65710.1	Uncharacterized protein OS=Rosa chinensis OX=74649 GN=RchiOBHm_Chr2g0109521 PE=3 SV=1	488.146	644.081	594.975	1721.43	1339.05	1996.1
FvH4_1g18801	115.087	-1.66873	0.478734	-3.48572	0.000490812	0.0031423	gi|470106038|ref|XP_004289384.1|	PREDICTED: probable sphingolipid transporter spinster homolog 2 [Fragaria vesca subsp. vesca]	-	-	-	Putative major facilitator superfamily OS=Rosa chinensis OX=74649 GN=RchiOBHm_Chr2g0109661 PE=4 SV=1	91.8612	151.261	183.346	66.7877	50.8498	16.395
FvH4_1g18850	24831.9	1.57965	0.270212	5.84596	5.03652e-09	9.61044e-08	gi|470103779|ref|XP_004288307.1|	PREDICTED: phosphoenolpyruvate carboxykinase [ATP]	-	-	-	Putative carboxy-lyase OS=Rosa chinensis OX=74649 GN=RchiOBHm_Chr2g0109721 PE=3 SV=1	11200.7	11889.2	15201.5	37760.4	40281.5	36411.3
FvH4_1g18900	15259.8	1.86235	0.125293	14.864	5.64729e-50	1.202e-46	gi|470103785|ref|XP_004288310.1|	PREDICTED: auxin-responsive protein IAA9 [Fragaria vesca subsp. vesca]	IAA9_ARATH	Auxin-responsive protein IAA9 OS=Arabidopsis thaliana OX=3702 GN=IAA9 PE=1 SV=1	AT5G65670.2	Auxin-responsive protein OS=Rosa chinensis OX=74649 GN=RchiOBHm_Chr2g0109881 PE=3 SV=1	11439.9	11452.9	10689.8	43205	38751.8	40147.4
FvH4_1g18910	373.488	-1.24807	0.379127	-3.29196	0.000994917	0.00569814	gi|764517247|ref|XP_011466554.1|	PREDICTED: uncharacterized protein At5g65660 [Fragaria vesca subsp. vesca]	-	-	-	Uncharacterized protein OS=Prunus persica OX=3760 GN=PRUPE_6G210400 PE=4 SV=1	523.395	610.901	456.567	237.049	258.487	174.197
FvH4_1g18920	322.41	-1.57365	0.510251	-3.08407	0.00204188	0.0104885	gi|764517256|ref|XP_004289388.2|	PREDICTED: uncharacterized protein LOC101306678 [Fragaria vesca subsp. vesca]	-	-	AT3G53440.2	Putative Homeobox domain-containing protein OS=Rosa chinensis OX=74649 GN=RchiOBHm_Chr2g0109931 PE=4 SV=1	534.077	841.209	585.988	206.948	222.468	229.531
FvH4_1g18930	2673.26	1.8818	0.17041	11.0428	2.37455e-28	5.24485e-26	gi|470103789|ref|XP_004288312.1|	PREDICTED: transcription factor bHLH93-like [Fragaria vesca subsp. vesca]	BH093_ARATH	Transcription factor bHLH93 OS=Arabidopsis thaliana OX=3702 GN=BHLH93 PE=1 SV=1	AT5G65640.1	Putative transcription factor bHLH family OS=Rosa chinensis OX=74649 GN=RchiOBHm_Chr2g0109941 PE=4 SV=1	1085.24	1165.2	1177.37	4616.81	3862.47	4154.09
FvH4_1g18990	991.009	-1.20565	0.232771	-5.17957	2.224e-07	3.15006e-06	gi|470106051|ref|XP_004289390.1|	PREDICTED: uncharacterized protein At4g37920, chloroplastic [Fragaria vesca subsp. vesca]	Y4920_ARATH	Uncharacterized protein At4g37920 OS=Arabidopsis thaliana OX=3702 GN=At4g37920 PE=2 SV=2	AT4G37920.1	Uncharacterized protein OS=Rosa chinensis OX=74649 GN=RchiOBHm_Chr2g0110011 PE=4 SV=1	1390.74	923.183	1574.62	489.149	673.76	523.617
FvH4_1g19090	24067.7	-1.96405	0.242354	-8.10404	5.31646e-16	2.67112e-14	-	-	GLYM_SOLTU	Serine hydroxymethyltransferase, mitochondrial OS=Solanum tuberosum OX=4113 PE=2 SV=1	AT4G37930.1	Serine hydroxymethyltransferase OS=Rosa chinensis OX=74649 GN=RchiOBHm_Chr2g0110071 PE=3 SV=1	35590.9	30360.6	41523.3	9169.66	7517.3	10859.7
FvH4_1g19100	202.965	-1.89153	0.358227	-5.28025	1.29006e-07	1.91044e-06	-	-	-	-	AT5G65613.1	Uncharacterized protein OS=Rosa chinensis OX=74649 GN=RchiOBHm_Chr2g0110091 PE=4 SV=1	328.991	267.391	222.891	54.5589	74.156	92.2221
FvH4_1g19171	56.6356	4.78186	1.07838	4.4343	9.23735e-06	9.50238e-05	-	-	LRK91_ARATH	L-type lectin-domain containing receptor kinase IX.1 OS=Arabidopsis thaliana OX=3702 GN=LECRK91 PE=1 SV=1	-	Uncharacterized protein OS=Rosa chinensis OX=74649 GN=RchiOBHm_Chr2g0110221 PE=4 SV=1	0	2.92764	1.79751	65.847	25.4249	40.9876
FvH4_1g19180	14.8792	5.33951	1.55069	3.4433	0.000574654	0.0035688	-	-	LRK91_ARATH	L-type lectin-domain containing receptor kinase IX.1 OS=Arabidopsis thaliana OX=3702 GN=LECRK91 PE=1 SV=1	-	Uncharacterized protein OS=Rosa chinensis OX=74649 GN=RchiOBHm_Chr2g0110301 PE=4 SV=1	0	0	0	11.2881	8.47497	2.04938
FvH4_1g19340	1422.9	1.93553	0.405535	4.77278	1.81703e-06	2.1486e-05	-	-	DXS2_ORYSJ	Probable 1-deoxy-D-xylulose-5-phosphate synthase 2, chloroplastic OS=Oryza sativa subsp. japonica OX=39947 GN=Os07g0190000 PE=2 SV=1	AT4G15560.1	Putative 1-deoxy-D-xylulose-5-phosphate synthase OS=Rosa chinensis OX=74649 GN=RchiOBHm_Chr2g0110711 PE=3 SV=1	584.28	652.864	436.795	2287.71	1736.31	2378.31
FvH4_1g19370	12.2043	-6.55359	1.84482	-3.55242	0.000381702	0.00252742	-	-	SOT15_ARATH	Cytosolic sulfotransferase 15 OS=Arabidopsis thaliana OX=3702 GN=SOT15 PE=1 SV=1	AT5G07010.1	Sulfotransferase OS=Rosa chinensis OX=74649 GN=RchiOBHm_Chr1g0353081 PE=3 SV=1	19.2268	31.2282	1.79751	0	0	0
FvH4_1g19460	1127.92	-1.12383	0.361899	-3.10537	0.0019004	0.00986783	-	-	U91A1_ARATH	UDP-glycosyltransferase 91A1 OS=Arabidopsis thaliana OX=3702 GN=UGT91A1 PE=2 SV=1	AT2G22590.1	Glycosyltransferase OS=Rosa chinensis OX=74649 GN=RchiOBHm_Chr2g0110901 PE=3 SV=1	1223.04	1373.06	946.388	469.395	542.398	613.789
FvH4_1g19530	669.617	2.89811	0.376852	7.69033	1.4676e-14	6.24743e-13	-	-	AIL6_ARATH	AP2-like ethylene-responsive transcription factor AIL6 OS=Arabidopsis thaliana OX=3702 GN=AIL6 PE=2 SV=1	-	Putative transcription factor AP2-EREBP family OS=Rosa chinensis OX=74649 GN=RchiOBHm_Chr2g0111031 PE=4 SV=1	419.784	312.282	422.414	2395.89	3276.64	2933.69
FvH4_1g19790	1733.09	-2.91168	0.966535	-3.01249	0.0025911	0.0127261	gi|1220086145|ref|XP_021829810.1|	uncharacterized protein LOC110770040 [Prunus avium]	-	-	-	Putative PE-PGRS family protein PE_PGRS46-like OS=Prunus yedoensis var. nudiflora OX=2094558 GN=Pyn_38950 PE=4 SV=1	2802.84	6425.2	7168.46	852.248	459.767	866.888
FvH4_1g19810	292.516	-2.11484	0.762779	-2.77255	0.00556196	0.0238197	gi|1365956489|ref|XP_024178010.1|	uncharacterized protein LOC112183928 [Rosa chinensis]	-	-	-	Uncharacterized protein OS=Prunus persica OX=3760 GN=PRUPE_ppa015163mg PE=4 SV=1	401.626	1239.37	898.754	218.236	68.8592	299.21
FvH4_1g19921	53.0313	-1.99093	0.585569	-3.4	0.000673863	0.00409371	gi|1365960009|ref|XP_024179494.1|	toll/interleukin-1 receptor-like protein isoform X1 [Rosa chinensis]	TMVRN_NICGU	TMV resistance protein N OS=Nicotiana glutinosa OX=35889 GN=N PE=1 SV=1	AT1G72920.1	TMV resistance protein N (Fragment) OS=Mucuna pruriens OX=157652 GN=N PE=4 SV=1	98.2701	82.9498	129.421	22.5761	43.4342	12.2963
FvH4_1g19960	49.0965	-4.94534	1.55753	-3.17512	0.00149777	0.00809494	gi|1358174067|gb|PRQ48542.1|	putative protein DA1 [Rosa chinensis]	DAR1_ARATH	Protein DA1-related 1 OS=Arabidopsis thaliana OX=3702 GN=DAR1 PE=1 SV=3	-	Uncharacterized protein OS=Rosa chinensis OX=74649 GN=RchiOBHm_Chr2g0111871 PE=4 SV=1	57.6803	87.8292	109.648	0	4.23749	4.09876
FvH4_1g20010	537.456	-1.23066	0.366781	-3.35531	0.000792757	0.00470215	gi|1365973499|ref|XP_024185853.1|	putative laccase-9 [Rosa chinensis]	-	-	-	Laccase OS=Rosa chinensis OX=74649 GN=RchiOBHm_Chr2g0111951 PE=3 SV=1	159.155	211.766	320.855	141.101	54.028	99.3949
FvH4_1g20060	10569.5	1.1101	0.303606	3.65639	0.000255792	0.0017729	gi|764518890|ref|XP_011468006.1|	PREDICTED: classical arabinogalactan protein 5-like [Fragaria vesca subsp. vesca]	-	-	-	Uncharacterized protein OS=Rosa chinensis OX=74649 GN=RchiOBHm_Chr2g0112051 PE=4 SV=1	6841.52	8668.75	8405.15	16544.5	15234.8	19845.2
FvH4_1g20164	1007.84	1.28994	0.196176	6.57545	4.85071e-11	1.26752e-09	gi|470105862|ref|XP_004289297.1|	PREDICTED: RING-H2 finger protein ATL52-like [Fragaria vesca subsp. vesca]	ATL54_ARATH	RING-H2 finger protein ATL54 OS=Arabidopsis thaliana OX=3702 GN=ATL54 PE=2 SV=2	AT4G33565.1	Putative transcription factor C2H2 family OS=Rosa chinensis OX=74649 GN=RchiOBHm_Chr2g0112241 PE=4 SV=1	827.819	961.242	816.968	2329.1	1566.81	2475.65
FvH4_1g20180	216.197	1.65304	0.631123	2.6192	0.00881368	0.0346582	gi|764515495|ref|XP_011465253.1|	PREDICTED: uncharacterized protein LOC101308504 isoform X2 [Fragaria vesca subsp. vesca]	-	-	AT2G14095.1	Uncharacterized protein OS=Rosa chinensis OX=74649 GN=RchiOBHm_Chr2g0112251 PE=4 SV=1	130.315	353.269	161.776	570.987	1057.25	401.679
FvH4_1g20240	601.248	1.41909	0.481365	2.94806	0.00319779	0.0151436	-	-	-	-	-	Uncharacterized protein OS=Rosa chinensis OX=74649 GN=RchiOBHm_Chr2g0112381 PE=4 SV=1	348.218	536.734	330.742	1215.35	1205.56	829.999
FvH4_1g20311	29.64	-2.56774	1.0173	-2.52407	0.0116006	0.0434622	-	-	-	-	-	Uncharacterized protein OS=Rosa chinensis OX=74649 GN=RchiOBHm_Chr4g0440531 PE=4 SV=1	72.6345	39.0352	62.9128	18.8134	8.47497	2.04938
FvH4_1g20400	881.757	1.13254	0.286471	3.95341	7.70442e-05	0.000619237	-	-	-	-	-	Putative taurine-transporting ATPase OS=Rosa chinensis OX=74649 GN=RchiOBHm_Chr2g0112641 PE=4 SV=1	220.04	272.271	388.262	795.808	523.33	612.765
FvH4_1g20410	47.1616	2.22766	0.641927	3.47026	0.000519948	0.00329549	-	-	-	-	-	Putative taurine-transporting ATPase OS=Rosa chinensis OX=74649 GN=RchiOBHm_Chr2g0112641 PE=4 SV=1	25.6357	20.4935	44.9377	219.176	59.3248	148.58
FvH4_1g20450	29204.8	-1.61095	0.257684	-6.25165	4.06133e-10	9.12553e-09	-	-	-	-	-	Phospho-2-dehydro-3-deoxyheptonate aldolase OS=Fragaria ananassa OX=3747 GN=DAHPS2 PE=2 SV=1	19833.5	23801.7	24327.5	7238.47	7221.74	7789.69
FvH4_1g20560	235.674	-1.51195	0.289978	-5.214	1.84813e-07	2.65136e-06	-	-	EPFL1_ARATH	EPidERMAL PATTERNING FACTOR-like protein 1 OS=Arabidopsis thaliana OX=3702 GN=EPFL1 PE=1 SV=1	AT5G10310.2	Uncharacterized protein OS=Rosa chinensis OX=74649 GN=RchiOBHm_Chr2g0112781 PE=4 SV=1	331.128	343.51	262.436	122.287	93.2247	112.716
FvH4_1g20570	1575.57	-2.67534	0.218256	-12.2578	1.52496e-34	7.14078e-32	-	-	GPPL1_ARATH	Haloacid dehalogenase-like hydrolase domain-containing protein At4g39970 OS=Arabidopsis thaliana OX=3702 GN=At4g39970 PE=2 SV=1	AT4G39970.1	Putative HAD hydrolase, subfamily IA OS=Rosa chinensis OX=74649 GN=RchiOBHm_Chr2g0112791 PE=4 SV=1	2557.16	2314.79	3060.26	415.777	377.136	448.814
FvH4_1g20572	86.8047	1.77682	0.706264	2.51581	0.0118761	0.0443114	-	-	UGTK5_MANES	Linamarin synthase 2 OS=Manihot esculenta OX=3983 GN=UGT85K5 PE=1 SV=1	AT1G22360.2	Glycosyltransferase OS=Rosa chinensis OX=74649 GN=RchiOBHm_Chr2g0113011 PE=3 SV=1	104.679	35.1317	50.3302	217.295	158.906	274.617
FvH4_1g20573	12.9896	7.46305	1.63739	4.5579	5.16679e-06	5.60047e-05	-	-	UGTK5_MANES	Linamarin synthase 2 OS=Manihot esculenta OX=3983 GN=UGT85K5 PE=1 SV=1	AT1G22400.1	Glycosyltransferase OS=Rosa chinensis OX=74649 GN=RchiOBHm_Chr2g0113011 PE=3 SV=1	1.06815	0	0	77.135	56.1467	52.2592
FvH4_1g20710	4110.85	-1.83301	0.181769	-10.0843	6.48343e-24	8.38656e-22	-	-	RK29_ARATH	50S ribosomal protein L29, chloroplastic OS=Arabidopsis thaliana OX=3702 GN=RPL29 PE=1 SV=1	AT5G65220.1	Putative ribosomal protein L29 OS=Rosa chinensis OX=74649 GN=RchiOBHm_Chr2g0113161 PE=3 SV=1	5973.12	5576.18	6347	1537.06	1703.47	1782.96
FvH4_1g20721	203.958	1.83721	0.437118	4.20302	2.63379e-05	0.000241161	-	-	CMTA3_ARATH	Calmodulin-binding transcription activator 3 OS=Arabidopsis thaliana OX=3702 GN=CAMTA3 PE=1 SV=1	AT2G22300.3	Uncharacterized protein OS=Prunus persica OX=3760 GN=PRUPE_ppa000612mg PE=4 SV=1	98.2701	103.443	116.838	475.98	391.968	270.518
FvH4_1g20820	974.489	-1.70495	0.29998	-5.68356	1.31917e-08	2.35051e-07	-	-	-	-	-	Uncharacterized protein OS=Rosa chinensis OX=74649 GN=RchiOBHm_Chr2g0113441 PE=4 SV=1	989.11	751.428	889.767	144.863	332.643	329.95
FvH4_1g20821	285.697	-2.3601	0.30198	-7.81542	5.4778e-15	2.46638e-13	-	-	-	-	-	Putative proteasome endopeptidase complex OS=Rosa chinensis OX=74649 GN=RchiOBHm_Chr5g0003071 PE=4 SV=1	254.221	247.874	164.472	47.0336	52.9686	29.716
FvH4_1g20830	120.585	-1.19289	0.343262	-3.47517	0.000510534	0.00324725	-	-	-	-	-	Putative transcription factor CG1-CAMTA family OS=Rosa chinensis OX=74649 GN=RchiOBHm_Chr2g0113351 PE=4 SV=1	91.8612	73.191	67.4066	48.9149	27.5437	24.5926
FvH4_1g21110	894.046	1.31433	0.300095	4.37973	1.18828e-05	0.000119251	gi|764516187|ref|XP_011465671.1|	PREDICTED: protein kinase 3 [Fragaria vesca subsp. vesca]	-	-	AT5G65170.1	Uncharacterized protein OS=Prunus persica OX=3760 GN=PRUPE_6G183200 PE=4 SV=1	645.165	556.252	717.206	1633.01	1312.56	1826
FvH4_1g21140	92.3921	1.20278	0.454398	2.64697	0.00812163	0.0324436	gi|470105907|ref|XP_004289319.1|	PREDICTED: inactive TPR repeat-containing thioredoxin TTL3 [Fragaria vesca subsp. vesca]	TTL3_ARATH	Inactive TPR repeat-containing thioredoxin TTL3 OS=Arabidopsis thaliana OX=3702 GN=TTL3 PE=1 SV=2	AT5G65160.1	Putative 43kDa postsynaptic protein OS=Rosa chinensis OX=74649 GN=RchiOBHm_Chr2g0114921 PE=4 SV=1	32.0446	81.974	82.6854	174.024	187.509	92.2221
FvH4_1g21150	1992.08	1.21478	0.240324	5.05477	4.309e-07	5.7881e-06	gi|470103585|ref|XP_004288215.1|	PREDICTED: uncharacterized protein LOC101300664 [Fragaria vesca subsp. vesca]	PLAT1_ARATH	PLAT domain-containing protein 1 OS=Arabidopsis thaliana OX=3702 GN=PLAT1 PE=1 SV=1	AT4G39730.1	Putative PLAT/LH2 domain-containing protein OS=Rosa chinensis OX=74649 GN=RchiOBHm_Chr2g0114931 PE=4 SV=1	1634.28	1739.02	1696.85	3822.89	4510.8	3434.76
FvH4_1g21290	48.1034	-2.04441	0.755908	-2.70457	0.00683926	0.0281964	gi|764516259|ref|XP_004288222.2|	PREDICTED: type I inositol 1,4,5-trisphosphate 5-phosphatase CVP2 [Fragaria vesca subsp. vesca]	-	-	-	Putative inositol-polyphosphate 5-phosphatase OS=Rosa chinensis OX=74649 GN=RchiOBHm_Chr2g0115121 PE=4 SV=1	29.9083	72.2152	70.1028	18.8134	10.5937	12.2963
FvH4_1g21310	65.2143	1.67325	0.500358	3.34411	0.000825477	0.00486334	gi|764522541|ref|XP_011457555.1|	PREDICTED: phosphoglycerate mutase-like [Fragaria vesca subsp. vesca]	-	-	-	Putative phosphoglycerate mutase (2,3-diphosphoglycerate-dependent) OS=Rosa chinensis OX=74649 GN=RchiOBHm_Chr2g0115141 PE=3 SV=1	19.2268	39.0352	21.5701	67.7283	82.631	104.518
FvH4_1g21440	2681.82	1.09918	0.326831	3.36315	0.00077059	0.0045838	gi|470103602|ref|XP_004288223.1|	PREDICTED: uncharacterized protein LOC101303450 [Fragaria vesca subsp. vesca]	FLZ6_ARATH	FCS-Like Zinc finger 6 OS=Arabidopsis thaliana OX=3702 GN=FLZ6 PE=1 SV=1	AT1G78020.1	Putative Zf-FLZ domain-containing protein OS=Rosa chinensis OX=74649 GN=RchiOBHm_Chr2g0115261 PE=4 SV=1	2559.3	2223.06	2394.28	5588.53	4257.61	5528.2
FvH4_1g21540	385.044	2.33114	0.611679	3.81105	0.00013838	0.00103643	gi|470132658|ref|XP_004302195.1|	PREDICTED: L-ascorbate oxidase [Fragaria vesca subsp. vesca]	ASO_CUCMA	L-ascorbate oxidase OS=Cucurbita maxima OX=3661 GN=AAO PE=1 SV=2	AT4G39830.1	Putative oxidoreductase OS=Rosa chinensis OX=74649 GN=RchiOBHm_Chr4g0415131 PE=3 SV=1	211.494	448.905	217.499	1945.31	1650.5	821.801
FvH4_1g21630	2299.91	-2.44708	0.236152	-10.3623	3.67936e-25	5.70496e-23	gi|470132662|ref|XP_004302197.1|	PREDICTED: photosynthetic NDH subunit of lumenal location 4, chloroplastic [Fragaria vesca subsp. vesca]	PNSL4_ARATH	Photosynthetic NDH subunit of lumenal location 4, chloroplastic OS=Arabidopsis thaliana OX=3702 GN=PNSL4 PE=1 SV=1	AT4G39710.2	Peptidylprolyl isomerase OS=Rosa chinensis OX=74649 GN=RchiOBHm_Chr2g0115501 PE=4 SV=1	3512.09	2767.6	4073.15	585.098	625.029	688.592
FvH4_1g21842	38.6161	10.3301	1.52302	6.78263	1.18006e-11	3.35707e-10	-	-	-	-	-	Putative polygalacturonase OS=Rosa chinensis OX=74649 GN=RchiOBHm_Chr2g0115771 PE=3 SV=1	0	0	0	219.176	233.062	242.852
FvH4_1g21850	1588.69	7.99455	0.979376	8.1629	3.27073e-16	1.68673e-14	-	-	-	-	-	Putative polygalacturonase OS=Rosa chinensis OX=74649 GN=RchiOBHm_Chr2g0115801 PE=3 SV=1	42.7261	29.2764	39.5452	9646.58	10166.8	8631.99
FvH4_1g22080	7743.68	-1.43023	0.199972	-7.15215	8.5427e-13	2.89032e-11	-	-	AB1K8_ARATH	Protein ACTIVITY OF BC1 COMPLEX KINASE 8, chloroplastic OS=Arabidopsis thaliana OX=3702 GN=ABC1K8 PE=2 SV=1	AT5G64940.2	Putative cadmium-transporting ATPase OS=Rosa chinensis OX=74649 GN=RchiOBHm_Chr2g0116161 PE=4 SV=1	10426.2	9934.46	12606.8	4279.11	3678.14	4276.03
FvH4_1g22110	30.9448	-3.38296	0.974308	-3.47217	0.00051627	0.00328106	-	-	NFYB3_ARATH	Nuclear transcription factor Y subunit B-3 OS=Arabidopsis thaliana OX=3702 GN=NFYB3 PE=1 SV=1	AT4G14540.1	Putative transcription factor Hap3/NF-YB family OS=Rosa chinensis OX=74649 GN=RchiOBHm_Chr2g0116211 PE=4 SV=1	89.7249	81.974	61.1153	7.52537	14.8312	0
FvH4_1g22220	439.535	2.7912	0.374928	7.44462	9.7226e-14	3.77504e-12	-	-	-	-	-	Putative chlorophyll a/b binding protein OS=Rosa chinensis OX=74649 GN=RchiOBHm_Chr2g0116361 PE=4 SV=1	107.884	88.8051	202.22	1077.07	755.332	932.468
FvH4_1g22260	902.869	-2.10063	0.307349	-6.83467	8.21918e-12	2.41753e-10	gi|470138219|ref|XP_004304856.1|	PREDICTED: uncharacterized protein LOC101297070 [Fragaria vesca subsp. vesca]	-	-	AT2G21960.1	Uncharacterized protein OS=Rosa chinensis OX=74649 GN=RchiOBHm_Chr2g0116401 PE=4 SV=1	1258.29	1276.45	1567.43	231.405	377.136	348.395
FvH4_1g22320	905.956	-3.36413	0.358142	-9.3933	5.81511e-21	5.42427e-19	gi|764597027|ref|XP_011466134.1|	PREDICTED: LOW QUALITY PROTEIN: phosphatidylinositol transfer protein CSR1-like [Fragaria vesca subsp. vesca]	MSPD2_MOUSE	Motile sperm domain-containing protein 2 OS=Mus musculus OX=10090 GN=Mospd2 PE=1 SV=2	AT5G63060.2	Putative CRAL-TRIO lipid binding domain, CRAL/TRIO domain-containing protein OS=Rosa chinensis OX=74649 GN=RchiOBHm_Chr7g0193121 PE=4 SV=1	1168.56	1201.31	1656.4	126.991	149.371	114.765
FvH4_1g22720	873.473	-1.3213	0.21223	-6.22578	4.79153e-10	1.06235e-08	gi|470104328|ref|XP_004288559.1|	PREDICTED: nudix hydrolase 26, chloroplastic-like [Fragaria vesca subsp. vesca]	-	-	-	Putative bis(5'-nucleosyl)-tetraphosphatase (Asymmetrical) OS=Rosa chinensis OX=74649 GN=RchiOBHm_Chr2g0117011 PE=3 SV=1	863.068	827.547	1109.06	344.286	335.821	440.617
FvH4_1g22820	166.554	3.18614	0.627693	5.07595	3.85568e-07	5.23322e-06	gi|470104316|ref|XP_004288553.1|	PREDICTED: probable WRKY transcription factor 51 [Fragaria vesca subsp. vesca]	WRK51_ARATH	Probable WRKY transcription factor 51 OS=Arabidopsis thaliana OX=3702 GN=WRKY51 PE=1 SV=1	AT5G64810.1	Putative transcription factor FAR family OS=Rosa chinensis OX=74649 GN=RchiOBHm_Chr2g0117181 PE=4 SV=1	49.1351	74.1669	80.8879	739.368	667.404	452.913
FvH4_1g23000	693.609	-1.44549	0.223297	-6.47339	9.58303e-11	2.39965e-09	-	-	SAMC1_ARATH	S-adenosylmethionine carrier 1, chloroplastic/mitochondrial OS=Arabidopsis thaliana OX=3702 GN=SAMC1 PE=1 SV=1	AT4G39460.3	Putative mitochondrial carrier protein OS=Rosa chinensis OX=74649 GN=RchiOBHm_Chr2g0117551 PE=3 SV=1	786.161	782.656	844.829	297.252	343.236	245.926
FvH4_1g23082	557.391	-1.61407	0.398559	-4.04977	5.1269e-05	0.000429775	-	-	-	-	-	Putative transcription factor WRKY family OS=Rosa chinensis OX=74649 GN=RchiOBHm_Chr2g0117781 PE=4 SV=1	1036.11	698.73	727.991	235.168	173.737	395.53
FvH4_1g23121	11.7525	8.25715	1.89865	4.34897	1.36781e-05	0.000135068	-	-	-	-	-	Putative ribonuclease H OS=Rosa chinensis OX=74649 GN=RchiOBHm_Chr4g0404581 PE=4 SV=1	0	0	0	62.0843	82.631	20.4938
FvH4_1g23211	54.1838	3.63161	0.742544	4.89078	1.00439e-06	1.25284e-05	-	-	-	-	-	Uncharacterized protein OS=Corchorus olitorius OX=93759 GN=COLO4_17423 PE=4 SV=1	32.0446	15.6141	14.3801	236.108	277.555	253.098
FvH4_1g23231	10.174	-3.10099	1.04229	-2.97516	0.00292837	0.0140958	-	-	-	-	-	Uncharacterized protein OS=Fagus sylvatica OX=28930 GN=FSB_LOCUS42165 PE=4 SV=1	8.54523	23.4211	19.7726	1.88134	2.11874	2.04938
FvH4_1g23232	1854.96	-2.72209	0.382862	-7.10984	1.16181e-12	3.83661e-11	gi|470105765|ref|XP_004289250.1|	PREDICTED: bifunctional 3-dehydroquinate dehydratase/shikimate dehydrogenase, chloroplastic-like [Fragaria vesca subsp. vesca]	DHQSD_ARATH	Bifunctional 3-dehydroquinate dehydratase/shikimate dehydrogenase, chloroplastic OS=Arabidopsis thaliana OX=3702 GN=EMB3004 PE=1 SV=1	AT3G06350.1	Putative shikimate dehydrogenase, 3-dehydroquinate dehydratase OS=Rosa chinensis OX=74649 GN=RchiOBHm_Chr2g0118061 PE=3 SV=1	2781.47	2677.82	3683.09	443.997	500.023	441.641
FvH4_1g23250	2108.79	1.76407	0.293905	6.00218	1.94689e-09	3.97754e-08	gi|1358174621|gb|PRQ49096.1|	hypothetical protein RchiOBHm_Chr2g0118101 [Rosa chinensis]	-	-	-	Uncharacterized protein OS=Rosa chinensis OX=74649 GN=RchiOBHm_Chr2g0118101 PE=4 SV=1	2167.28	1485.29	2626.16	7335.35	5392.2	8599.2
FvH4_1g23350	108.351	1.85776	0.593121	3.13218	0.00173514	0.00917037	-	-	ABR1_ARATH	Ethylene-responsive transcription factor ABR1 OS=Arabidopsis thaliana OX=3702 GN=ABR1 PE=2 SV=1	AT5G64750.1	Putative transcription factor AP2-EREBP family OS=Rosa chinensis OX=74649 GN=RchiOBHm_Chr2g0118251 PE=4 SV=1	6.40892	17.5658	30.5576	43.2709	69.9185	86.074
FvH4_1g23370	57.3395	2.46064	0.626345	3.92857	8.54524e-05	0.000677513	-	-	LERK3_ORYSJ	G-type lectin S-receptor-like serine/threonine-protein kinase LECRK3 OS=Oryza sativa subsp. japonica OX=39947 GN=LECRK3 PE=3 SV=2	AT5G60900.1	Uncharacterized protein OS=Rosa chinensis OX=74649 GN=RchiOBHm_Chr2g0118591 PE=4 SV=1	25.6357	21.4694	32.3552	180.609	88.9872	168.049
FvH4_1g23380	42.3323	3.86319	0.692069	5.58209	2.37639e-08	4.04644e-07	-	-	LERK3_ORYSI	G-type lectin S-receptor-like serine/threonine-protein kinase LECRK3 OS=Oryza sativa subsp. indica OX=39946 GN=LECRK3 PE=3 SV=2	AT5G60900.1	Uncharacterized protein OS=Rosa chinensis OX=74649 GN=RchiOBHm_Chr2g0118331 PE=4 SV=1	4.27261	3.90352	28.7601	215.414	134.54	193.666
FvH4_1g23400	217.991	1.22071	0.41683	2.92855	0.00340549	0.0159274	-	-	LERK3_ORYSJ	G-type lectin S-receptor-like serine/threonine-protein kinase LECRK3 OS=Oryza sativa subsp. japonica OX=39947 GN=LECRK3 PE=3 SV=2	AT5G60900.1	Uncharacterized protein OS=Rosa chinensis OX=74649 GN=RchiOBHm_Chr2g0118771 PE=4 SV=1	160.223	152.237	179.751	434.59	294.505	418.074
FvH4_1g23480	102.709	-3.16766	0.54076	-5.85779	4.69081e-09	9.00213e-08	-	-	ATL78_ARATH	RING-H2 finger protein ATL78 OS=Arabidopsis thaliana OX=3702 GN=ATL78 PE=2 SV=1	-	Putative transcription factor C2H2 family OS=Rosa chinensis OX=74649 GN=RchiOBHm_Chr2g0118861 PE=4 SV=1	303.356	316.185	204.916	30.1015	37.078	24.5926
FvH4_1g23500	55.4517	1.81408	0.55994	3.23978	0.00119621	0.0066906	-	-	Y3550_ARATH	REF/SRPP-like protein At3g05500 OS=Arabidopsis thaliana OX=3702 GN=At3g05500 PE=1 SV=1	-	Putative rubber elongation factor OS=Rosa chinensis OX=74649 GN=RchiOBHm_Chr2g0118901 PE=4 SV=1	21.3631	11.7106	53.9253	87.4824	144.075	75.8271
FvH4_1g23570	1907.62	-2.38486	0.278434	-8.56524	1.07849e-17	6.66246e-16	-	-	-	-	-	Putative plastid lipid-associated protein/fibrillin OS=Rosa chinensis OX=74649 GN=RchiOBHm_Chr2g0119121 PE=4 SV=1	2275.17	2053.25	2760.97	425.183	563.586	368.888
FvH4_1g23610	196.384	-1.16351	0.293605	-3.96284	7.40639e-05	0.000596716	-	-	-	-	-	Uncharacterized protein OS=Rosa chinensis OX=74649 GN=RchiOBHm_Chr2g0119191 PE=4 SV=1	155.95	179.562	122.231	52.6776	67.7998	84.0246
FvH4_1g23681	35.487	3.16736	1.27243	2.48922	0.0128023	0.0471613	gi|1365968161|ref|XP_024183420.1|	isoflavone 3'-hydroxylase-like [Rosa chinensis]	-	-	-	Putative oxidoreductase OS=Rosa chinensis OX=74649 GN=RchiOBHm_Chr2g0119411 PE=3 SV=1	19.2268	8.78292	14.3801	99.7112	129.243	151.654
FvH4_1g23750	11.5227	4.80578	1.57293	3.0553	0.00224833	0.0113327	gi|470103811|ref|XP_004288322.1|	PREDICTED: zeaxanthin epoxidase, chloroplastic-like [Fragaria vesca subsp. vesca]	MO3_ARATH	Monooxygenase 3 OS=Arabidopsis thaliana OX=3702 GN=MO3 PE=2 SV=1	AT5G05320.1	Putative FAD-dependent urate hydroxylase OS=Rosa chinensis OX=74649 GN=RchiOBHm_Chr2g0119621 PE=4 SV=1	0	3.90352	0	28.2201	36.0186	45.0864
FvH4_1g23790	8214.05	-1.55799	0.145161	-10.7329	7.136e-27	1.32599e-24	gi|470103813|ref|XP_004288323.1|	PREDICTED: probable cinnamyl alcohol dehydrogenase 9 [Fragaria vesca subsp. vesca]	CADH9_ARATH	Probable cinnamyl alcohol dehydrogenase 9 OS=Arabidopsis thaliana OX=3702 GN=CAD9 PE=2 SV=2	AT4G39330.1	Putative cinnamyl-alcohol dehydrogenase OS=Rosa chinensis OX=74649 GN=RchiOBHm_Chr2g0119681 PE=3 SV=1	6879.98	6091.45	7399.44	2226.57	1997.97	2693.91
FvH4_1g23900	49.1552	2.64059	0.90735	2.91022	0.00361171	0.0167051	gi|1365968276|ref|XP_024183475.1|	uncharacterized protein LOC112188566 [Rosa chinensis]	-	-	-	Uncharacterized protein OS=Prunus persica OX=3760 GN=PRUPE_ppb022962mg PE=4 SV=1	19.2268	40.987	23.3676	216.354	239.418	65.5802
FvH4_1g23971	70.8834	-1.81689	0.398215	-4.56258	5.05298e-06	5.48726e-05	gi|470106081|ref|XP_004289404.1|	PREDICTED: probable serine/threonine-protein kinase WNK7 [Fragaria vesca subsp. vesca]	-	-	-	Uncharacterized protein OS=Rosa chinensis OX=74649 GN=RchiOBHm_Chr2g0120101 PE=4 SV=1	83.316	122.961	89.8754	22.5761	39.1968	22.5432
FvH4_1g23990	189.15	1.82683	0.47121	3.87689	0.0001058	0.000819148	gi|1358174802|gb|PRQ49277.1|	hypothetical protein RchiOBHm_Chr2g0120121 [Rosa chinensis]	-	-	-	Uncharacterized protein OS=Rosa chinensis OX=74649 GN=RchiOBHm_Chr2g0120121 PE=4 SV=1	46.9988	44.8905	64.7103	137.338	150.431	268.469
FvH4_1g24030	1996.8	-1.36375	0.170508	-7.99814	1.26311e-15	6.09758e-14	gi|764517506|ref|XP_011466778.1|	PREDICTED: uncharacterized protein LOC101314514 [Fragaria vesca subsp. vesca]	-	-	-	Putative UMP kinase OS=Rosa chinensis OX=74649 GN=RchiOBHm_Chr2g0120171 PE=3 SV=1	3300.6	2422.14	2566.84	1170.2	1086.92	963.209
FvH4_1g24160	2204.29	-1.95087	0.244823	-7.9685	1.60612e-15	7.6276e-14	gi|470103918|ref|XP_004288374.1|	PREDICTED: cell wall / vacuolar inhibitor of fructosidase 2 [Fragaria vesca subsp. vesca]	CVIF2_ARATH	Cell wall / vacuolar inhibitor of fructosidase 2 OS=Arabidopsis thaliana OX=3702 GN=C/VIF2 PE=1 SV=1	AT5G64620.1	Putative pectinesterase inhibitor domain-containing protein OS=Rosa chinensis OX=74649 GN=RchiOBHm_Chr2g0120401 PE=4 SV=1	2817.79	2387	3350.56	731.842	605.961	875.085
FvH4_1g24330	1975.74	-2.23391	0.283198	-7.88816	3.06667e-15	1.4246e-13	-	-	NDHO_ARATH	NAD(P)H-quinone oxidoreductase subunit O, chloroplastic OS=Arabidopsis thaliana OX=3702 GN=ndhO PE=2 SV=1	AT1G74880.1	Putative NAD(P)H-quinone oxidoreductase subunit O OS=Rosa chinensis OX=74649 GN=RchiOBHm_Chr2g0120841 PE=4 SV=1	2513.37	2418.23	2878.71	498.556	691.77	470.333
FvH4_1g24350	3582.17	-1.91517	0.278218	-6.8837	5.83183e-12	1.74828e-10	-	-	PGLR_VITVI	Probable polygalacturonase OS=Vitis vinifera OX=29760 GN=GSVIVT00026920001 PE=1 SV=1	AT4G33440.1	Putative galacturan 1,4-alpha-galacturonidase OS=Rosa chinensis OX=74649 GN=RchiOBHm_Chr2g0120901 PE=3 SV=1	5559.74	4194.33	6027.94	1328.23	1297.73	1558.55
FvH4_1g24450	165.688	1.51746	0.495513	3.0624	0.00219571	0.0111225	-	-	PUB25_ARATH	U-box domain-containing protein 25 OS=Arabidopsis thaliana OX=3702 GN=PUB25 PE=2 SV=1	-	RING-type E3 ubiquitin transferase OS=Rosa chinensis OX=74649 GN=RchiOBHm_Chr2g0121551 PE=4 SV=1	96.1338	100.516	71.9003	226.702	210.815	330.975
FvH4_1g24510	1379.05	-1.34388	0.261954	-5.13021	2.89419e-07	4.01732e-06	-	-	-	-	-	Histone deacetylase OS=Rosa chinensis OX=74649 GN=RchiOBHm_Chr2g0121851 PE=4 SV=1	2277.3	1805.38	1779.53	687.631	775.46	846.394
FvH4_1g24520	1811.76	-1.43788	0.324655	-4.42895	9.4692e-06	9.71953e-05	-	-	-	-	-	ABC transporter-like OS=Parasponia andersonii OX=3476 GN=PanWU01x14_349990 PE=4 SV=1	2123.49	1975.18	2494.94	709.266	595.367	1129.21
FvH4_1g24530	59.6917	2.60553	0.550448	4.73347	2.2071e-06	2.58116e-05	gi|470103378|ref|XP_004288116.1|	PREDICTED: uncharacterized protein LOC101295653 [Fragaria vesca subsp. vesca]	-	-	AT1G76980.2	Uncharacterized protein OS=Rosa chinensis OX=74649 GN=RchiOBHm_Chr2g0121941 PE=4 SV=1	29.9083	35.1317	30.5576	272.795	138.778	170.099
FvH4_1g24560	362.716	-2.8117	0.27424	-10.2527	1.15095e-24	1.63316e-22	gi|764515220|ref|XP_011465000.1|	PREDICTED: protein ZINC INDUCED FACILITATOR 1-like [Fragaria vesca subsp. vesca]	ZIFL1_ARATH	Protein ZINC INDUCED FACILITATOR-LIKE 1 OS=Arabidopsis thaliana OX=3702 GN=ZIFL1 PE=2 SV=1	AT5G13750.2	Putative major facilitator superfamily OS=Rosa chinensis OX=74649 GN=RchiOBHm_Chr1g0330291 PE=4 SV=1	584.28	511.361	580.595	86.5418	74.156	77.8764
FvH4_1g24940	636.706	1.72779	0.220976	7.81893	5.32754e-15	2.40798e-13	gi|470103445|ref|XP_004288147.1|	PREDICTED: lipase-like PAD4 [Fragaria vesca subsp. vesca]	PAD4_ARATH	Lipase-like PAD4 OS=Arabidopsis thaliana OX=3702 GN=PAD4 PE=1 SV=1	AT3G52430.1	Putative carboxylesterase OS=Rosa chinensis OX=74649 GN=RchiOBHm_Chr2g0122591 PE=4 SV=1	519.123	519.168	553.633	2032.79	1467.23	1772.71
FvH4_1g24980	170.125	-1.92444	0.411816	-4.67305	2.96762e-06	3.37943e-05	gi|470103451|ref|XP_004288150.1|	PREDICTED: psbP domain-containing protein 2, chloroplastic isoform X1 [Fragaria vesca subsp. vesca]	PPD2_ARATH	PsbP domain-containing protein 2, chloroplastic OS=Arabidopsis thaliana OX=3702 GN=PPD2 PE=1 SV=1	AT2G28605.1	Putative PsbP family protein OS=Rosa chinensis OX=74649 GN=RchiOBHm_Chr2g0122611 PE=4 SV=1	260.63	156.141	235.474	39.5082	38.1374	94.2715
FvH4_1g25150	1626.51	1.16106	0.347626	3.33998	0.000837841	0.00492379	gi|470104175|ref|XP_004288488.1|	PREDICTED: NAC domain-containing protein 2-like [Fragaria vesca subsp. vesca]	-	-	-	Putative NAC-4 protein OS=Rosa chinensis OX=74649 PE=2 SV=1	1262.56	1736.09	1860.42	4247.13	3692.97	2926.51
FvH4_1g25230	4058.06	-1.33548	0.243188	-5.49155	3.98432e-08	6.44678e-07	gi|764519097|ref|XP_011468213.1|	PREDICTED: aldehyde dehydrogenase family 3 member H1-like [Fragaria vesca subsp. vesca]	-	-	-	Aldehyde dehydrogenase OS=Rosa chinensis OX=74649 GN=RchiOBHm_Chr2g0123141 PE=3 SV=1	6518.94	5378.08	6587.87	2536.05	1946.07	2842.49
FvH4_1g25280	3562.04	-1.7205	0.193419	-8.8952	5.83143e-19	4.33432e-17	gi|470106272|ref|XP_004289497.1|	PREDICTED: uncharacterized protein LOC101299245 [Fragaria vesca subsp. vesca]	-	-	AT1G71500.1	Putative rieske [2Fe-2S] iron-sulfur domain-containing protein OS=Rosa chinensis OX=74649 GN=RchiOBHm_Chr2g0123251 PE=4 SV=1	4990.41	5022.86	5929.08	1572.8	1447.1	1817.8
FvH4_1g25360	227.444	6.62652	1.5347	4.3178	1.57594e-05	0.000152532	gi|470106264|ref|XP_004289493.1|	PREDICTED: transcription factor HBP-1b(c1)-like [Fragaria vesca subsp. vesca]	DOGL3_ARATH	Protein DOG1-like 3 OS=Arabidopsis thaliana OX=3702 GN=DOGL3 PE=2 SV=1	AT3G14880.2	Putative transcription factor TGA like domain-containing protein OS=Rosa chinensis OX=74649 GN=RchiOBHm_Chr2g0123401 PE=4 SV=1	4.27261	17.5658	17.9751	1561.51	1286.08	1091.29
FvH4_1g25430	505.341	-1.26599	0.295629	-4.28238	1.84902e-05	0.00017541	-	-	GLYT3_ARATH	Probable glycosyltransferase At5g03795 OS=Arabidopsis thaliana OX=3702 GN=At5g03795 PE=3 SV=2	AT5G03795.1	Putative xylogalacturonan beta-1,3-xylosyltransferase OS=Rosa chinensis OX=74649 GN=RchiOBHm_Chr2g0123451 PE=4 SV=1	715.663	729.959	884.374	374.387	247.893	346.345
FvH4_1g25540	1371.39	-1.62087	0.272071	-5.95753	2.5608e-09	5.15087e-08	gi|764642777|ref|XP_011471022.1|	PREDICTED: fatty acid amide hydrolase-like isoform X1 [Fragaria vesca subsp. vesca]	FAAH_ARATH	Fatty acid amide hydrolase OS=Arabidopsis thaliana OX=3702 GN=FAAH PE=1 SV=1	AT5G64440.1	Putative hydrolase OS=Rosa chinensis OX=74649 GN=RchiOBHm_Chr2g0123671 PE=4 SV=1	1147.2	1781.96	1761.56	481.624	586.892	457.012
FvH4_1g25602	106.902	1.4603	0.567133	2.57489	0.0100272	0.0385496	-	-	-	-	-	-	66.2255	122.961	155.484	369.684	360.186	219.284
FvH4_1g25720	405.561	5.91122	0.588946	10.0369	1.04872e-23	1.32722e-21	-	-	-	-	-	Ammonium transporter OS=Rosa chinensis OX=74649 GN=RchiOBHm_Chr3g0484601 PE=3 SV=1	19.2268	54.6493	37.7477	2609.42	2228.92	1889.53
FvH4_1g26080	676.968	-1.92376	0.292155	-6.58473	4.55708e-11	1.20017e-09	gi|470104554|ref|XP_004288663.1|	PREDICTED: uncharacterized protein C24B11.05 [Fragaria vesca subsp. vesca]	-	-	-	Putative pyridoxal phosphatase OS=Rosa chinensis OX=74649 GN=RchiOBHm_Chr3g0485571 PE=4 SV=1	1482.6	1276.45	1190.85	348.048	384.552	308.432
FvH4_1g26180	37.3871	3.50203	1.20148	2.91476	0.00355963	0.0164935	gi|470103914|ref|XP_004288372.1|	PREDICTED: chitinase 10 [Fragaria vesca subsp. vesca]	CHI10_ORYSJ	Chitinase 10 OS=Oryza sativa subsp. japonica OX=39947 GN=Cht10 PE=2 SV=1	AT4G01700.1	Putative chitinase OS=Rosa chinensis OX=74649 GN=RchiOBHm_Chr3g0485671 PE=4 SV=1	2.13631	33.1799	8.98754	159.914	197.043	145.506
FvH4_1g26240	1998.4	-1.07426	0.179669	-5.9791	2.24373e-09	4.55616e-08	gi|764517944|ref|XP_011467172.1|	PREDICTED: protein translocase subunit SecA, chloroplastic [Fragaria vesca subsp. vesca]	SECA1_ARATH	Protein translocase subunit SECA1, chloroplastic OS=Arabidopsis thaliana OX=3702 GN=SECA1 PE=1 SV=2	AT4G01800.3	Protein translocase subunit SecA OS=Rosa chinensis OX=74649 GN=RchiOBHm_Chr3g0485781 PE=3 SV=1	2672.52	2326.5	2773.56	1263.32	1202.39	1225.53
FvH4_1g26330	1146.36	1.07469	0.21042	5.10735	3.26713e-07	4.4996e-06	-	-	-	-	AT2G47010.2	Uncharacterized protein OS=Rosa chinensis OX=74649 GN=RchiOBHm_Chr3g0486001 PE=4 SV=1	997.656	868.534	785.511	1791.04	1735.25	2057.58
FvH4_1g26490	437.197	1.29367	0.437561	2.95656	0.00311096	0.0148073	-	-	-	-	-	Putative transcription factor WD40-like family OS=Rosa chinensis OX=74649 GN=RchiOBHm_Chr3g0486551 PE=4 SV=1	186.927	376.69	372.084	712.088	644.098	938.616
FvH4_1g26540	138.346	3.02812	0.814871	3.71607	0.000202346	0.00144828	-	-	-	-	-	Putative oxidoreductase OS=Rosa chinensis OX=74649 GN=RchiOBHm_Chr3g0486621 PE=4 SV=1	40.5898	64.4081	127.623	558.759	881.397	459.061
FvH4_1g26560	429.097	-1.10278	0.44764	-2.46355	0.013757	0.04979	-	-	-	-	-	Hexosyltransferase OS=Rosa chinensis OX=74649 GN=RchiOBHm_Chr3g0486641 PE=3 SV=1	213.631	394.256	348.717	154.27	131.362	159.852
FvH4_1g26710	1564.86	-1.30948	0.24169	-5.41801	6.02661e-08	9.44591e-07	-	-	-	-	AT1G02475.1	Putative START-like domain-containing protein OS=Rosa chinensis OX=74649 GN=RchiOBHm_Chr3g0486891 PE=4 SV=1	2373.44	1838.56	2552.46	799.571	889.872	1040.06
FvH4_1g26760	225.723	3.35585	0.528516	6.34957	2.15923e-10	5.05036e-09	-	-	G2OX2_PEA	Gibberellin 2-beta-dioxygenase 2 OS=Pisum sativum OX=3888 GN=GA2OX2 PE=2 SV=1	AT1G02400.1	Putative gibberellin 2-beta-dioxygenase OS=Rosa chinensis OX=74649 GN=RchiOBHm_Chr3g0486971 PE=3 SV=1	87.5886	97.5881	122.231	1079.89	1122.93	945.789
FvH4_1g26780	123.943	-2.03642	0.437515	-4.65452	3.24731e-06	3.6676e-05	-	-	-	-	AT4G01935.1	Putative insulin-induced protein family OS=Rosa chinensis OX=74649 GN=RchiOBHm_Chr3g0487001 PE=4 SV=1	196.54	179.562	201.321	18.8134	41.3155	80.9505
FvH4_1g26810	5209.98	-2.16988	0.323764	-6.70204	2.05536e-11	5.64814e-10	-	-	LACS1_ARATH	Long chain acyl-CoA synthetase 1 OS=Arabidopsis thaliana OX=3702 GN=LACS1 PE=2 SV=1	AT2G47240.3	Putative long-chain-fatty-acid--CoA ligase OS=Rosa chinensis OX=74649 GN=RchiOBHm_Chr3g0487031 PE=4 SV=1	4448.86	5762.57	6956.36	1019.69	1582.7	1213.23
FvH4_1g26850	2438.44	-1.84915	0.284777	-6.49334	8.39559e-11	2.11361e-09	-	-	LACS1_ARATH	Long chain acyl-CoA synthetase 1 OS=Arabidopsis thaliana OX=3702 GN=LACS1 PE=2 SV=1	-	Putative long-chain-fatty-acid--CoA ligase OS=Rosa chinensis OX=74649 GN=RchiOBHm_Chr3g0487091 PE=4 SV=1	919.68	568.938	932.907	146.745	224.587	301.259
FvH4_1g26890	591.614	-2.22346	0.604689	-3.67703	0.000235967	0.00165509	-	-	-	-	-	Putative nepenthesin OS=Rosa chinensis OX=74649 GN=RchiOBHm_Chr3g0487141 PE=3 SV=1	549.031	1175.94	1064.12	248.337	137.718	211.086
FvH4_1g26980	313.505	1.35502	0.453731	2.98639	0.00282293	0.0136669	-	-	-	-	-	WRKY transcription factor OS=Rosa chinensis OX=74649 GN=RchiOBHm_Chr3g0487201 PE=3 SV=1	228.585	261.536	181.548	560.64	478.836	678.345
FvH4_1g27200	1375.73	-3.04082	0.352646	-8.62289	6.52866e-18	4.13123e-16	gi|470104345|ref|XP_004288567.1|	PREDICTED: uncharacterized protein LOC101314888 [Fragaria vesca subsp. vesca]	PETM_SPIOL	Cytochrome b6-f complex subunit 7 (Fragment) OS=Spinacia oleracea OX=3562 GN=petM PE=1 SV=1	AT2G26500.2	Putative PetM of cytochrome b6/f complex subunit 7 OS=Rosa chinensis OX=74649 GN=RchiOBHm_Chr3g0487591 PE=3 SV=1	1867.13	1594.59	2465.28	169.321	247.893	303.308
FvH4_1g27450	98.5619	3.6674	1.11368	3.29304	0.000991113	0.00568052	gi|1365985278|ref|XP_024191466.1|	butyrate--CoA ligase AAE11, peroxisomal-like [Rosa chinensis]	AAE11_ARATH	Butyrate--CoA ligase AAE11, peroxisomal OS=Arabidopsis thaliana OX=3702 GN=AAE11 PE=1 SV=1	AT1G66120.1	Putative 4-coumarate--CoA ligase OS=Rosa chinensis OX=74649 GN=RchiOBHm_Chr3g0488561 PE=4 SV=1	26.7038	62.4564	19.7726	611.436	558.289	214.16
FvH4_1g27452	124.409	1.29734	0.387207	3.35051	0.00080662	0.00477024	gi|1358146675|gb|PRQ21155.1|	putative RNA-directed DNA polymerase [Rosa chinensis]	-	-	-	Putative RNA-directed DNA polymerase OS=Rosa chinensis OX=74649 GN=RchiOBHm_Chr7g0236061 PE=4 SV=1	108.952	58.5528	52.1277	233.286	103.818	200.839
FvH4_1g27460	1686.15	-1.52156	0.311033	-4.89195	9.98402e-07	1.24736e-05	gi|470104370|ref|XP_004288578.1|	PREDICTED: glutathione S-transferase F11-like [Fragaria vesca subsp. vesca]	-	-	-	Putative glutathione transferase OS=Rosa chinensis OX=74649 GN=RchiOBHm_Chr3g0488551 PE=3 SV=1	2811.38	3124.77	3686.69	955.722	1207.68	1188.64
FvH4_1g27480	845.214	-2.44458	0.428774	-5.70132	1.18886e-08	2.1248e-07	gi|470106413|ref|XP_004289567.1|	PREDICTED: phytoene synthase 2, chloroplastic [Fragaria vesca subsp. vesca]	-	-	-	Putative 15-cis-phytoene synthase OS=Rosa chinensis OX=74649 GN=RchiOBHm_Chr3g0488531 PE=4 SV=1	215.767	119.057	222.891	15.0507	55.0873	32.7901
FvH4_1g27530	70.6152	-2.08054	0.770901	-2.69884	0.00695827	0.0285814	gi|1365976122|ref|XP_024186961.1|	small ubiquitin-related modifier 1-like [Rosa chinensis]	SUMO1_ORYSJ	Small ubiquitin-related modifier 1 OS=Oryza sativa subsp. japonica OX=39947 GN=SUMO1 PE=1 SV=1	AT5G55160.1	Putative Rad60/SUMO-like domain-containing protein OS=Rosa chinensis OX=74649 GN=RchiOBHm_Chr3g0488501 PE=4 SV=1	61.9529	80.0222	70.1028	39.5082	2.11874	8.19752
FvH4_1g27612	51.0486	-1.71097	0.559375	-3.05872	0.00222287	0.0112382	gi|764520486|ref|XP_011469259.1|	PREDICTED: cysteine-rich receptor-like protein kinase 3 isoform X2 [Fragaria vesca subsp. vesca]	CRK3_ARATH	Cysteine-rich receptor-like protein kinase 3 OS=Arabidopsis thaliana OX=3702 GN=CRK3 PE=2 SV=1	AT1G70530.3	Uncharacterized protein OS=Rosa chinensis OX=74649 GN=RchiOBHm_Chr3g0487811 PE=4 SV=1	40.5898	75.1428	78.1916	22.5761	26.4843	10.2469
FvH4_1g27613	266.712	-1.19051	0.290267	-4.10143	4.10613e-05	0.000354214	gi|764542299|ref|XP_011459210.1|	PREDICTED: cysteine-rich receptor-like protein kinase 2 [Fragaria vesca subsp. vesca]	GNKL1_PICGL	Antifungal protein ginkbilobin-like protein 1 OS=Picea glauca OX=3330 GN=EMB24 PE=2 SV=1	AT5G40380.1	Putative non-specific serine/threonine protein kinase OS=Rosa chinensis OX=74649 GN=RchiOBHm_Chr3g0487871 PE=4 SV=1	252.084	317.161	239.967	113.821	125.006	115.79
FvH4_1g27614	406.956	-1.30834	0.303873	-4.30554	1.66579e-05	0.000159972	gi|764520496|ref|XP_011469270.1|	PREDICTED: psbQ-like protein 3, chloroplastic isoform X4 [Fragaria vesca subsp. vesca]	PQL3_ARATH	PsbQ-like protein 3, chloroplastic OS=Arabidopsis thaliana OX=3702 GN=PQL3 PE=2 SV=1	AT2G01918.1	Putative oxygen-evolving enhancer protein OS=Rosa chinensis OX=74649 GN=RchiOBHm_Chr3g0487781 PE=4 SV=1	476.397	428.412	584.19	192.838	210.815	197.765
FvH4_1g27810	734.336	-1.37299	0.251618	-5.45667	4.85143e-08	7.74805e-07	-	-	5NT3_DANRE	Cytosolic 5'-nucleotidase 3 OS=Danio rerio OX=7955 GN=nt5c3 PE=2 SV=2	AT2G38680.1	Putative phosphoric monoester hydrolase OS=Rosa chinensis OX=74649 GN=RchiOBHm_Chr1g0332191 PE=4 SV=1	723.14	799.246	1028.17	285.964	426.927	272.568
FvH4_1g27813	917.871	-1.06494	0.162609	-6.5491	5.78866e-11	1.4812e-09	-	-	RECAC_ARATH	DNA repair protein recA homolog 1, chloroplastic OS=Arabidopsis thaliana OX=3702 GN=RECA PE=2 SV=1	-	Putative DNA recombination and repair protein RecA OS=Rosa chinensis OX=74649 GN=RchiOBHm_Chr3g0488901 PE=3 SV=1	1279.65	1067.61	1203.43	515.488	648.335	533.864
FvH4_1g28070	4830.24	-1.7539	0.26376	-6.64959	2.93906e-11	7.92768e-10	-	-	NDF5_ARATH	Protein NDH-DEPENDENT CYCLIC ELECTRON FLOW 5 OS=Arabidopsis thaliana OX=3702 GN=NDF5 PE=2 SV=1	AT1G55370.2	Putative galactose mutarotase-like domain-containing protein OS=Rosa chinensis OX=74649 GN=RchiOBHm_Chr3g0497181 PE=4 SV=1	6264.72	5529.34	7090.27	1798.56	1883.56	1917.2
FvH4_1g28120	1171.75	-1.91687	0.396343	-4.83639	1.32218e-06	1.60728e-05	-	-	DHE1_ARATH	Glutamate dehydrogenase 1 OS=Arabidopsis thaliana OX=3702 GN=GDH1 PE=2 SV=1	AT5G18170.1	Glutamate dehydrogenase OS=Rosa chinensis OX=74649 GN=RchiOBHm_Chr3g0497101 PE=3 SV=1	3207.67	2118.64	2462.59	674.461	617.614	770.567
FvH4_1g28150	135.107	1.54862	0.334108	4.63509	3.56785e-06	3.99684e-05	-	-	-	-	-	Adenylyl-sulfate kinase OS=Rosa chinensis OX=74649 GN=RchiOBHm_Chr3g0497061 PE=3 SV=1	106.815	122.961	84.4829	326.413	345.355	246.95
FvH4_1g28170	382.136	2.13586	0.252559	8.45685	2.7469e-17	1.61998e-15	-	-	-	-	-	-	255.289	227.38	284.006	1321.64	998.987	1049.28
FvH4_1g28340	4195.35	1.6802	0.276439	6.07799	1.21698e-09	2.5395e-08	-	-	-	-	-	DNA ligase 1-like OS=Gossypium hirsutum OX=3635 GN=LOC107957212 PE=4 SV=1	1226.24	1803.43	1426.32	5493.52	2446.09	6340.78
FvH4_1g28520	2566.8	-1.18567	0.198399	-5.9762	2.28408e-09	4.62605e-08	gi|470148372|ref|XP_004309741.1|	PREDICTED: probable zinc metalloprotease EGY1, chloroplastic [Fragaria vesca subsp. vesca]	-	-	-	Putative peptidase M50 OS=Rosa chinensis OX=74649 GN=RchiOBHm_Chr3g0496231 PE=4 SV=1	3601.81	3247.73	3629.17	1456.16	1589.06	1561.63
FvH4_1g28523	226.314	-1.36001	0.336627	-4.0401	5.34284e-05	0.00044596	-	-	-	-	-	-	312.969	286.909	346.919	96.8891	183.271	89.148
FvH4_1g28524	980.139	-1.11436	0.307537	-3.62351	0.000290633	0.00198442	-	-	-	-	-	Putative chromatin remodeling & transcriptional activation HMG family OS=Rosa chinensis OX=74649 GN=RchiOBHm_Chr4g0447101 PE=4 SV=1	1201.67	1237.42	1375.99	507.962	859.15	395.53
FvH4_1g28580	2822.26	-1.07698	0.173513	-6.20692	5.40336e-10	1.18788e-08	gi|764522732|ref|XP_011457629.1|	PREDICTED: probable polyribonucleotide nucleotidyltransferase 1, chloroplastic [Fragaria vesca subsp. vesca]	PNP1_ORYSJ	Probable polyribonucleotide nucleotidyltransferase 1, chloroplastic OS=Oryza sativa subsp. japonica OX=39947 GN=PNP1 PE=2 SV=1	-	Putative polyribonucleotide nucleotidyltransferase OS=Rosa chinensis OX=74649 GN=RchiOBHm_Chr3g0496111 PE=3 SV=1	3205.53	3330.68	3645.35	1515.42	1676.99	1634.38
FvH4_1g28600	1292.69	-1.40373	0.268748	-5.22324	1.75819e-07	2.54102e-06	gi|470103958|ref|XP_004288392.1|	PREDICTED: uncharacterized oxidoreductase At4g09670-like [Fragaria vesca subsp. vesca]	-	-	-	Putative D-xylose 1-dehydrogenase (NADP(+)) OS=Rosa chinensis OX=74649 GN=RchiOBHm_Chr3g0492491 PE=4 SV=1	1922.68	1664.85	1912.55	765.706	470.361	842.295
FvH4_1g28620	161.74	1.13579	0.397163	2.85976	0.00423956	0.019085	gi|470103942|ref|XP_004288384.1|	PREDICTED: pentatricopeptide repeat-containing protein At3g14330 [Fragaria vesca subsp. vesca]	PP229_ARATH	Pentatricopeptide repeat-containing protein At3g14330 OS=Arabidopsis thaliana OX=3702 GN=PCMP-H57 PE=2 SV=2	AT3G14330.1	Pentatricopeptide repeat-containing protein OS=Prunus yedoensis var. nudiflora OX=2094558 GN=Pyn_04364 PE=4 SV=1	163.428	119.057	100.66	309.481	306.158	225.432
FvH4_1g28660	1398.56	-1.297	0.237179	-5.46847	4.53948e-08	7.29464e-07	gi|470103956|ref|XP_004288391.1|	PREDICTED: psbP domain-containing protein 6, chloroplastic [Fragaria vesca subsp. vesca]	PPD6_ARATH	PsbP domain-containing protein 6, chloroplastic OS=Arabidopsis thaliana OX=3702 GN=PPD6 PE=1 SV=1	AT3G56650.1	Putative photosystem II OS=Rosa chinensis OX=74649 GN=RchiOBHm_Chr3g0492661 PE=4 SV=1	2065.81	1857.1	2270.25	818.384	786.054	916.073
FvH4_1g28700	2353.15	-1.67822	0.179207	-9.36471	7.62586e-21	6.94725e-19	gi|470103952|ref|XP_004288389.1|	PREDICTED: glutathione S-transferase DHAR3, chloroplastic isoform X2 [Fragaria vesca subsp. vesca]	DHAR3_ARATH	Glutathione S-transferase DHAR3, chloroplastic OS=Arabidopsis thaliana OX=3702 GN=DHAR3 PE=1 SV=1	AT5G16710.1	Dehydroascorbate reductase (Fragment) OS=Fragaria ananassa OX=3747 GN=DHAR PE=2 SV=1	3264.28	2924.71	3681.3	935.027	862.329	1287.01
FvH4_1g28731	918.879	2.96989	0.427234	6.95142	3.61631e-12	1.11114e-10	-	-	RSI1_SOLLC	Protein RSI-1 OS=Solanum lycopersicum OX=4081 GN=RSI-1 PE=2 SV=1	AT1G74670.1	Uncharacterized protein OS=Lotus japonicus OX=34305 PE=2 SV=1	356.763	423.532	533.86	2652.69	4362.49	3283.11
FvH4_1g28960	34143.6	-2.18669	0.230791	-9.47479	2.67296e-21	2.6295e-19	-	-	-	-	-	Putative magnesium-protoporphyrin IX monomethyl ester (Oxidative) cyclase OS=Rosa chinensis OX=74649 GN=RchiOBHm_Chr3g0494361 PE=3 SV=1	48006	42957.3	51065.4	9604.25	9570.36	12022.7
FvH4_1g28990	4503.69	1.10201	0.167767	6.56872	5.07483e-11	1.32019e-09	gi|470135031|ref|XP_004303334.1|	PREDICTED: 2-hydroxyacyl-CoA lyase [Fragaria vesca subsp. vesca]	HACL_ARATH	2-hydroxyacyl-CoA lyase OS=Arabidopsis thaliana OX=3702 GN=HACL PE=1 SV=1	AT5G17380.1	Putative oxalyl-CoA decarboxylase OS=Rosa chinensis OX=74649 GN=RchiOBHm_Chr3g0494041 PE=3 SV=1	3503.54	4024.53	3267.87	8926.97	7906.09	6339.76
FvH4_1g29110	1223.37	-2.22107	0.368319	-6.0303	1.63658e-09	3.373e-08	-	-	-	-	-	Uncharacterized protein OS=Rosa chinensis OX=74649 GN=RchiOBHm_Chr3g0493521 PE=4 SV=1	1315.97	1564.34	2139.03	272.795	269.08	534.888
FvH4_1g29160	3457.47	-1.87555	0.175825	-10.6671	1.45071e-26	2.65355e-24	-	-	SIGB_ARATH	RNA polymerase sigma factor sigB OS=Arabidopsis thaliana OX=3702 GN=SIGB PE=2 SV=2	AT1G08540.1	RNA polymerase sigma factor OS=Rosa chinensis OX=74649 GN=RchiOBHm_Chr3g0494481 PE=3 SV=1	5142.09	5459.08	5498.58	1538.94	1175.9	1672.29
FvH4_1g29311	47.9928	-3.62331	1.18296	-3.06292	0.00219187	0.0111055	-	-	-	-	-	-	185.859	174.683	219.296	6.5847	16.9499	23.5679
FvH4_1g29730	772.429	-1.09328	0.184227	-5.93444	2.94857e-09	5.86532e-08	-	-	CYSK4_ARATH	Probable S-sulfocysteine synthase, chloroplastic OS=Arabidopsis thaliana OX=3702 GN=At3g03630 PE=1 SV=1	AT3G03630.1	Cysteine synthase OS=Rosa chinensis OX=74649 GN=RchiOBHm_Chr3g0495741 PE=3 SV=1	1228.38	950.508	1240.28	500.437	489.43	612.765
FvH4_1g29740	2354.27	-1.46236	0.230821	-6.33547	2.36613e-10	5.50132e-09	-	-	-	-	-	Uncharacterized protein OS=Rosa chinensis OX=74649 GN=RchiOBHm_Chr3g0495761 PE=4 SV=1	3501.41	2699.29	3754.99	1256.74	1072.08	1283.94
FvH4_1g29750	100.874	-1.92193	0.610754	-3.14681	0.0016506	0.00877907	-	-	-	-	-	Putative TTHA0068-like domain-containing protein OS=Rosa chinensis OX=74649 GN=RchiOBHm_Chr3g0495771 PE=4 SV=1	143.133	99.5398	204.916	18.8134	33.8999	65.5802
FvH4_1g30240	1012.78	-1.48682	0.359329	-4.13777	3.50699e-05	0.000310549	gi|470104456|ref|XP_004288619.1|	PREDICTED: nudix hydrolase 18, mitochondrial-like [Fragaria vesca subsp. vesca]	NUD17_ARATH	Nudix hydrolase 17, mitochondrial OS=Arabidopsis thaliana OX=3702 GN=NUDT17 PE=2 SV=1	AT2G01670.1	Putative hydrolase OS=Rosa chinensis OX=74649 GN=RchiOBHm_Chr3g0491151 PE=4 SV=1	927.157	837.305	1184.56	391.319	406.799	254.123
FvH4_1g30290	97.2207	1.78086	0.616849	2.88702	0.00388912	0.0177655	gi|470106461|ref|XP_004289590.1|	PREDICTED: protein ODORANT1-like [Fragaria vesca subsp. vesca]	MYB20_ARATH	Transcription factor MYB20 OS=Arabidopsis thaliana OX=3702 GN=MYB20 PE=2 SV=1	AT1G66230.1	Putative transcription factor MYB-HB-like family OS=Rosa chinensis OX=74649 GN=RchiOBHm_Chr3g0491061 PE=4 SV=1	85.4523	37.0835	10.7851	195.66	135.6	125.012
FvH4_1g30340	805.779	-2.74616	0.820571	-3.34665	0.000817942	0.00483232	gi|470104458|ref|XP_004288620.1|	PREDICTED: protein TPX2 isoform X2 [Fragaria vesca subsp. vesca]	-	-	-	Uncharacterized protein OS=Rosa chinensis OX=74649 GN=RchiOBHm_Chr3g0490251 PE=4 SV=1	87.5886	111.25	80.8879	20.6948	12.7125	8.19752
FvH4_2g00080	1064.24	-2.32347	0.454432	-5.1129	3.17247e-07	4.37696e-06	-	-	-	-	-	Putative fructokinase OS=Rosa chinensis OX=74649 GN=RchiOBHm_Chr6g0249341 PE=4 SV=1	190.131	142.479	116.838	16.9321	42.3749	30.7407
FvH4_2g00100	4278.85	-1.36813	0.342663	-3.99264	6.53413e-05	0.000533274	-	-	-	-	-	Putative rmlC-like jelly roll protein OS=Rosa chinensis OX=74649 GN=RchiOBHm_Chr6g0249351 PE=4 SV=1	5520.22	4457.82	6354.19	2016.8	2142.05	2168.24
FvH4_2g00200	182.95	2.00107	0.479721	4.17133	3.02826e-05	0.000271754	-	-	-	-	-	Putative proton-dependent oligopeptide transporter family, major facilitator superfamily OS=Rosa chinensis OX=74649 GN=RchiOBHm_Chr6g0249481 PE=4 SV=1	264.902	122.961	95.2679	528.657	480.955	922.221
FvH4_2g00210	146.322	10.2642	1.29327	7.93661	2.0779e-15	9.78872e-14	gi|470107886|ref|XP_004290269.1|	PREDICTED: LOW QUALITY PROTEIN: probable beta-1,3-galactosyltransferase 8 [Fragaria vesca subsp. vesca]	B3GT8_ARATH	Probable beta-1,3-galactosyltransferase 8 OS=Arabidopsis thaliana OX=3702 GN=B3GALT8 PE=2 SV=1	AT1G33430.1	Hexosyltransferase OS=Rosa chinensis OX=74649 GN=RchiOBHm_Chr6g0249501 PE=3 SV=1	0	0	0	280.32	199.162	184.444
FvH4_2g00300	456.543	-1.50084	0.291238	-5.15332	2.55919e-07	3.59654e-06	-	-	ATL7_ARATH	RING-H2 finger protein ATL7 OS=Arabidopsis thaliana OX=3702 GN=ATL7 PE=2 SV=1	AT4G10150.1	Putative transcription factor C2H2 family OS=Rosa chinensis OX=74649 GN=RchiOBHm_Chr6g0249581 PE=4 SV=1	529.804	437.194	573.405	120.406	262.724	161.901
FvH4_2g00610	299.006	2.26458	0.649043	3.4891	0.000484644	0.00310961	gi|764529780|ref|XP_004292398.2|	PREDICTED: endoglucanase 9-like isoform X1 [Fragaria vesca subsp. vesca]	-	-	-	Putative cellulase OS=Rosa chinensis OX=74649 GN=RchiOBHm_Chr6g0251081 PE=3 SV=1	253.152	236.163	273.221	1298.13	1315.74	1050.31
FvH4_2g00640	285.372	-1.98139	0.367979	-5.38452	7.26366e-08	1.12328e-06	gi|764530007|ref|XP_011458251.1|	PREDICTED: 4-hydroxy-tetrahydrodipicolinate reductase 2, chloroplastic-like isoform X1 [Fragaria vesca subsp. vesca]	DAPB1_ARATH	4-hydroxy-tetrahydrodipicolinate reductase 1, chloroplastic OS=Arabidopsis thaliana OX=3702 GN=DAPB1 PE=1 SV=2	AT2G44040.1	Putative 4-hydroxy-tetrahydrodipicolinate reductase OS=Rosa chinensis OX=74649 GN=RchiOBHm_Chr2g0084421 PE=4 SV=1	464.647	317.161	430.503	92.1858	117.59	97.3456
FvH4_2g00740	806.785	1.06068	0.238137	4.45409	8.42514e-06	8.75533e-05	gi|470107831|ref|XP_004290243.1|	PREDICTED: leucine-rich repeat receptor-like serine/threonine-protein kinase BAM3 [Fragaria vesca subsp. vesca]	RLP12_ARATH	Receptor-like protein 12 OS=Arabidopsis thaliana OX=3702 GN=RLP12 PE=2 SV=2	AT1G33590.2	Putative leucine-rich repeat-containing, plant-type, leucine-rich repeat domain, L OS=Rosa chinensis OX=74649 GN=RchiOBHm_Chr6g0251101 PE=4 SV=1	674.005	920.255	775.625	1943.43	1020.17	1979.7
FvH4_2g00840	450.45	1.85683	0.237716	7.81112	5.66813e-15	2.54718e-13	gi|470107102|ref|XP_004289889.1|	PREDICTED: uncharacterized protein LOC101294899 isoform X1 [Fragaria vesca subsp. vesca]	-	-	-	Uncharacterized protein OS=Rosa chinensis OX=74649 GN=RchiOBHm_Chr5g0058561 PE=4 SV=1	214.699	217.621	216.6	796.749	857.032	696.789
FvH4_2g00980	5.47184	7.2767	2.43475	2.98868	0.00280182	0.0135844	gi|1336327720|gb|POE65790.1|	hypothetical protein CFP56_38260 [Quercus suber]	-	-	-	Uncharacterized protein OS=Quercus suber OX=58331 GN=CFP56_36617 PE=4 SV=1	0	0	0	9.40671	48.7311	25.6173
FvH4_2g01060	2581.61	-2.74289	0.292436	-9.37945	6.632e-21	6.09805e-19	gi|470107080|ref|XP_004289878.1|	PREDICTED: protein STAY-GREEN LIKE, chloroplastic [Fragaria vesca subsp. vesca]	-	-	-	Putative staygreen protein OS=Rosa chinensis OX=74649 GN=RchiOBHm_Chr6g0251541 PE=4 SV=1	4078.21	3357.03	4276.27	590.742	558.289	600.468
FvH4_2g01070	20.2144	-3.27668	1.05663	-3.10108	0.00192819	0.00998112	gi|470107078|ref|XP_004289877.1|	PREDICTED: SKP1-like protein 4 [Fragaria vesca subsp. vesca]	-	-	-	Putative S-phase kinase-associated protein OS=Rosa chinensis OX=74649 GN=RchiOBHm_Chr6g0244461 PE=3 SV=1	39.5217	33.1799	52.1277	7.52537	5.29686	0
FvH4_2g01090	120.531	-2.82624	0.707867	-3.99262	6.5348e-05	0.000533274	gi|1358148082|gb|PRQ22561.1|	hypothetical protein RchiOBHm_Chr6g0251661 [Rosa chinensis]	-	-	-	Uncharacterized protein OS=Rosa chinensis OX=74649 GN=RchiOBHm_Chr6g0251661 PE=4 SV=1	77.9752	84.9016	70.1028	13.1694	3.17811	16.395
FvH4_2g01330	283.074	-5.00719	0.701005	-7.14288	9.13986e-13	3.08388e-11	-	-	AAP2_ARATH	Amino acid permease 2 OS=Arabidopsis thaliana OX=3702 GN=AAP2 PE=1 SV=1	AT5G09220.1	Putative amino acid transporter, transmembrane domain-containing protein OS=Rosa chinensis OX=74649 GN=RchiOBHm_Chr6g0252251 PE=4 SV=1	1075.63	484.037	317.26	2.82201	10.5937	45.0864
FvH4_2g01480	9959.88	-3.90373	0.317275	-12.3039	8.6284e-35	4.29823e-32	-	-	-	-	-	Putative major facilitator superfamily domain-containing protein OS=Rosa chinensis OX=74649 GN=RchiOBHm_Chr6g0244111 PE=4 SV=1	10897.3	9366.5	11372.8	852.248	779.698	481.604
FvH4_2g01510	471.111	-1.4113	0.3666	-3.84969	0.000118266	0.000902532	-	-	-	-	-	Putative endo-1,4-beta-xylanase OS=Rosa chinensis OX=74649 GN=RchiOBHm_Chr6g0244121 PE=4 SV=1	561.849	468.423	350.514	118.525	224.587	176.247
FvH4_2g01511	18.2379	-6.12477	1.50852	-4.06013	4.90461e-05	0.000415154	-	-	-	-	-	Putative transcription factor C2H2 family OS=Rosa chinensis OX=74649 GN=RchiOBHm_Chr1g0362121 PE=4 SV=1	12.8178	22.4453	3.59502	0	0	0
FvH4_2g01590	81.3771	3.63953	1.10343	3.29839	0.000972394	0.00558143	-	-	-	-	-	Uncharacterized protein OS=Rosa chinensis OX=74649 GN=RchiOBHm_Chr6g0244271 PE=4 SV=1	3.20446	0	10.7851	53.6183	77.3341	45.0864
FvH4_2g01600	3255.01	-3.98116	0.862979	-4.61327	3.9638e-06	4.39624e-05	-	-	-	-	-	Putative DnaJ domain-containing protein OS=Rosa chinensis OX=74649 GN=RchiOBHm_Chr6g0244331 PE=4 SV=1	8932.97	5764.53	5908.41	310.422	452.352	542.061
FvH4_2g01660	717.389	3.3295	0.43058	7.73259	1.05378e-14	4.56891e-13	-	-	DIR21_ARATH	Dirigent protein 21 OS=Arabidopsis thaliana OX=3702 GN=DIR21 PE=3 SV=1	AT1G65870.1	Dirigent protein OS=Rosa chinensis OX=74649 GN=RchiOBHm_Chr6g0244551 PE=3 SV=1	292.674	378.642	275.019	4080.63	3042.52	2389.58
FvH4_2g01681	363.25	-1.71256	0.29396	-5.82584	5.68269e-09	1.07125e-07	-	-	DIR23_ARATH	Dirigent protein 23 OS=Arabidopsis thaliana OX=3702 GN=DIR23 PE=2 SV=1	AT2G21100.2	Dirigent protein OS=Rosa chinensis OX=74649 GN=RchiOBHm_Chr6g0244561 PE=3 SV=1	442.216	322.041	263.335	80.8977	95.3434	137.308
FvH4_2g01690	57.7532	-4.02813	1.2738	-3.1623	0.00156526	0.00839865	-	-	DIR23_ARATH	Dirigent protein 23 OS=Arabidopsis thaliana OX=3702 GN=DIR23 PE=2 SV=1	-	Dirigent protein OS=Rosa chinensis OX=74649 GN=RchiOBHm_Chr6g0244571 PE=3 SV=1	87.5886	243.97	149.193	18.8134	10.5937	0
FvH4_2g01722	1784.9	-1.95797	0.307856	-6.36002	2.01722e-10	4.75142e-09	gi|764525818|ref|XP_011457929.1|	PREDICTED: uncharacterized protein LOC101306479 isoform X2 [Fragaria vesca subsp. vesca]	AMI4G_ARATH	Probable amidase At4g34880 OS=Arabidopsis thaliana OX=3702 GN=At4g34880 PE=2 SV=1	AT4G34880.2	Putative asparaginyl-tRNA synthase (Glutamine-hydrolyzing) OS=Rosa chinensis OX=74649 GN=RchiOBHm_Chr6g0244741 PE=4 SV=1	1828.68	1901.02	1991.64	378.15	319.93	774.666
FvH4_2g01740	442.32	-1.82883	0.33174	-5.51283	3.53099e-08	5.80556e-07	gi|470107015|ref|XP_004289846.1|	PREDICTED: cleavage and polyadenylation specificity factor subunit 6 [Fragaria vesca subsp. vesca]	-	-	AT2G16630.1	Uncharacterized protein OS=Rosa chinensis OX=74649 GN=RchiOBHm_Chr6g0244771 PE=4 SV=1	260.63	320.089	266.031	56.4403	52.9686	129.111
FvH4_2g01750	1153.96	1.42342	0.534849	2.66136	0.00778264	0.0313192	gi|470111854|ref|XP_004292157.1|	PREDICTED: DBIRD complex subunit ZNF326 [Fragaria vesca subsp. vesca]	IF4B3_ARATH	Eukaryotic translation initiation factor 4B3 OS=Arabidopsis thaliana OX=3702 GN=EIF4B3 PE=1 SV=1	AT4G38710.1	Putative plant specific eukaryotic initiation factor 4B OS=Rosa chinensis OX=74649 GN=RchiOBHm_Chr6g0244781 PE=4 SV=1	557.576	905.617	699.231	1668.75	2947.17	1184.54
FvH4_2g01940	49680	1.16757	0.212412	5.49673	3.86908e-08	6.27768e-07	-	-	CYP1_SOYBN	Peptidyl-prolyl cis-trans isomerase 1 OS=Glycine max OX=3847 GN=Cyp1 PE=2 SV=1	AT2G16600.1	Peptidyl-prolyl cis-trans isomerase OS=Rosa chinensis OX=74649 GN=RchiOBHm_Chr6g0245141 PE=3 SV=1	38670.4	37227.9	37705.4	85381.9	81516.5	88292.4
FvH4_2g01970	10257.1	-1.48581	0.436689	-3.40244	0.00066788	0.00405947	-	-	PRP4_ARATH	Proline-rich protein 4 OS=Arabidopsis thaliana OX=3702 GN=PRP4 PE=2 SV=1	AT4G38770.1	proline-rich protein 4-like OS=Juglans regia OX=51240 GN=LOC108993369 PE=4 SV=1	12077.6	17398	21516.2	5008.13	2644.19	10554.3
FvH4_2g02240	2447.61	-1.87529	0.215595	-8.69819	3.3723e-18	2.21786e-16	gi|470111835|ref|XP_004292148.1|	PREDICTED: pentatricopeptide repeat-containing protein MRL1, chloroplastic [Fragaria vesca subsp. vesca]	PP349_ARATH	Pentatricopeptide repeat-containing protein MRL1, chloroplastic OS=Arabidopsis thaliana OX=3702 GN=MRL1 PE=1 SV=2	AT4G34830.1	Putative tetratricopeptide-like helical domain, pentacotripeptide-repeat region of PROPR OS=Rosa chinensis OX=74649 GN=RchiOBHm_Chr6g0245931 PE=4 SV=1	3285.64	3472.18	3803.53	1079.89	786.054	1012.39
FvH4_2g02490	1267.69	-1.13255	0.356453	-3.17729	0.00148658	0.00804563	gi|470106724|ref|XP_004289711.1|	PREDICTED: malate dehydrogenase, glyoxysomal isoform X2 [Fragaria vesca subsp. vesca]	MDHG_CITLA	Malate dehydrogenase, glyoxysomal OS=Citrullus lanatus OX=3654 PE=1 SV=1	AT2G22780.1	Malate dehydrogenase OS=Rosa chinensis OX=74649 GN=RchiOBHm_Chr6g0246321 PE=3 SV=1	1711.18	1628.74	1495.53	818.384	736.263	650.678
FvH4_2g02530	56.7913	-2.2907	0.736643	-3.10964	0.00187314	0.00974533	gi|764547394|ref|XP_011459654.1|	PREDICTED: malate dehydrogenase, glyoxysomal-like [Fragaria vesca subsp. vesca]	MDHG_CITLA	Malate dehydrogenase, glyoxysomal OS=Citrullus lanatus OX=3654 PE=1 SV=1	AT2G22780.1	Malate dehydrogenase OS=Rosa chinensis OX=74649 GN=RchiOBHm_Chr6g0246321 PE=3 SV=1	54.4758	98.5639	129.421	6.5847	36.0186	15.3704
FvH4_2g02540	968.764	1.41806	0.321687	4.40819	1.04237e-05	0.000106017	gi|470111668|ref|XP_004292067.1|	PREDICTED: receptor-like protein kinase HAIKU2 [Fragaria vesca subsp. vesca]	RLK7_ARATH	Receptor-like protein kinase 7 OS=Arabidopsis thaliana OX=3702 GN=RLK7 PE=1 SV=1	AT1G09970.1	Uncharacterized protein OS=Rosa chinensis OX=74649 GN=RchiOBHm_Chr6g0246351 PE=3 SV=1	551.167	891.955	690.243	2460.8	1699.23	1541.13
FvH4_2g02590	198.724	1.3984	0.342879	4.0784	4.53474e-05	0.00038622	gi|470106735|ref|XP_004289716.1|	PREDICTED: squalene monooxygenase-like [Fragaria vesca subsp. vesca]	ERG1_PANGI	Squalene monooxygenase OS=Panax ginseng OX=4054 PE=2 SV=1	-	Putative squalene monooxygenase OS=Rosa chinensis OX=74649 GN=RchiOBHm_Chr6g0246951 PE=4 SV=1	128.178	130.768	179.751	457.166	411.036	288.963
FvH4_2g02600	84.3029	2.88099	0.541561	5.31979	1.03885e-07	1.56014e-06	gi|470106737|ref|XP_004289717.1|	PREDICTED: squalene monooxygenase-like [Fragaria vesca subsp. vesca]	ERG1_PANGI	Squalene monooxygenase OS=Panax ginseng OX=4054 PE=2 SV=1	-	Putative squalene monooxygenase OS=Rosa chinensis OX=74649 GN=RchiOBHm_Chr1g0337301 PE=4 SV=1	38.4535	20.4935	27.8614	189.075	269.08	180.345
FvH4_2g02610	79.0163	-4.62443	0.815684	-5.66939	1.43309e-08	2.53421e-07	gi|470111676|ref|XP_004292071.1|	PREDICTED: anthocyanidin 3-O-glucosyltransferase 7-like [Fragaria vesca subsp. vesca]	KGLT_PETHY	Kaempferol 3-O-beta-D-galactosyltransferase OS=Petunia hybrida OX=4102 PE=1 SV=1	-	Glycosyltransferase OS=Rosa chinensis OX=74649 GN=RchiOBHm_Chr4g0393121 PE=3 SV=1	91.8612	165.9	75.4954	13.1694	0	0
FvH4_2g02750	972.886	2.18882	0.287553	7.61187	2.70157e-14	1.10819e-12	gi|470106754|ref|XP_004289725.1|	PREDICTED: uncharacterized protein LOC101315189 [Fragaria vesca subsp. vesca]	-	-	AT5G23950.1	Putative C2 domain-containing protein OS=Rosa chinensis OX=74649 GN=RchiOBHm_Chr6g0247211 PE=4 SV=1	828.887	650.912	650.698	3503.06	4016.08	2192.84
FvH4_2g02760	78.6246	2.45813	0.988848	2.48585	0.0129241	0.0474504	gi|470106756|ref|XP_004289726.1|	PREDICTED: branched-chain-amino-acid aminotransferase 6-like isoform X1 [Fragaria vesca subsp. vesca]	BCAT2_ARATH	Branched-chain-amino-acid aminotransferase 2, chloroplastic OS=Arabidopsis thaliana OX=3702 GN=BCAT2 PE=1 SV=1	-	Putative transaminase OS=Rosa chinensis OX=74649 GN=RchiOBHm_Chr6g0247341 PE=4 SV=1	8.54523	36.1076	0	122.287	86.8685	35.8642
FvH4_2g02781	13.1122	-5.49649	1.7656	-3.11311	0.0018513	0.00965572	gi|1228762042|ref|XP_022026135.1|	uncharacterized protein LOC110926742, partial [Helianthus annuus]	POL3_DROME	Retrovirus-related Pol polyprotein from transposon 17.6 OS=Drosophila melanogaster OX=7227 GN=pol PE=4 SV=1	ATMG00860.1	Uncharacterized protein OS=Vitis vinifera OX=29760 GN=VITISV_032357 PE=4 SV=1	0	8.78292	16.1776	0	0	0
FvH4_2g02810	19.2575	1.80717	0.634223	2.84942	0.00437984	0.0195809	gi|1366027646|ref|XP_024166263.1|	basic form of pathogenesis-related protein 1-like [Rosa chinensis]	PRB1_TOBAC	Basic form of pathogenesis-related protein 1 OS=Nicotiana tabacum OX=4097 PE=3 SV=1	AT2G19990.1	Uncharacterized protein OS=Rosa chinensis OX=74649 GN=RchiOBHm_Chr6g0247401 PE=3 SV=1	19.2268	15.6141	14.3801	67.7283	51.9092	52.2592
FvH4_2g02820	77.7155	-4.63634	0.866678	-5.34956	8.81701e-08	1.34222e-06	gi|1358147703|gb|PRQ22182.1|	hypothetical protein RchiOBHm_Chr6g0247451 [Rosa chinensis]	PRB1_ARATH	Pathogenesis-related protein 1 OS=Arabidopsis thaliana OX=3702 GN=PRB1 PE=2 SV=1	AT4G33720.1	Uncharacterized protein OS=Rosa chinensis OX=74649 GN=RchiOBHm_Chr6g0247451 PE=4 SV=1	91.8612	77.0946	85.3816	1.88134	8.47497	0
FvH4_2g02860	226.282	4.34779	1.38322	3.14323	0.00167097	0.0088713	gi|470106694|ref|XP_004289697.1|	PREDICTED: pathogenesis-related protein 1A-like [Fragaria vesca subsp. vesca]	PR1C_TOBAC	Pathogenesis-related protein 1C OS=Nicotiana tabacum OX=4097 PE=2 SV=3	AT4G33720.1	Uncharacterized protein OS=Rosa chinensis OX=74649 GN=RchiOBHm_Chr6g0247671 PE=3 SV=1	38.4535	46.8423	97.0655	1287.78	1223.57	1202.99
FvH4_2g02870	14.9439	8.83165	2.16997	4.06994	4.70251e-05	0.000399119	gi|764523910|ref|XP_004289698.2|	PREDICTED: branched-chain-amino-acid aminotransferase 6-like isoform X1 [Fragaria vesca subsp. vesca]	BCAT6_ARATH	Branched-chain-amino-acid aminotransferase 6 OS=Arabidopsis thaliana OX=3702 GN=BCAT6 PE=1 SV=1	AT1G50110.1	Putative transaminase OS=Rosa chinensis OX=74649 GN=RchiOBHm_Chr6g0247341 PE=4 SV=1	0	0	0	128.872	72.0373	45.0864
FvH4_2g03010	939.283	1.00872	0.308711	3.26753	0.00108489	0.00615773	-	-	-	-	AT1G10020.1	Uncharacterized protein OS=Rosa chinensis OX=74649 GN=RchiOBHm_Chr6g0247801 PE=4 SV=1	459.306	511.361	431.402	963.247	1097.51	760.32
FvH4_2g03250	931.325	1.5055	0.389781	3.86242	0.000112272	0.000861276	gi|470106818|ref|XP_004289755.1|	PREDICTED: UDP-glycosyltransferase 74F2-like [Fragaria vesca subsp. vesca]	U74F2_ARATH	UDP-glycosyltransferase 74F2 OS=Arabidopsis thaliana OX=3702 GN=UGT74F2 PE=1 SV=1	AT2G43820.1	Glycosyltransferase OS=Rosa chinensis OX=74649 GN=RchiOBHm_Chr6g0248411 PE=3 SV=1	519.123	681.165	593.178	2110.87	1484.18	1497.07
FvH4_2g03260	2381.18	1.71033	0.34782	4.91728	8.77556e-07	1.10881e-05	-	-	U74E1_ARATH	UDP-glycosyltransferase 74E1 OS=Arabidopsis thaliana OX=3702 GN=UGT74E1 PE=3 SV=1	AT1G05675.1	Glycosyltransferase OS=Rosa chinensis OX=74649 GN=RchiOBHm_Chr6g0248421 PE=3 SV=1	970.952	1559.46	1298.7	4947.93	3762.89	3820.04
FvH4_2g03300	1499.14	1.96025	0.320023	6.12536	9.04788e-10	1.93459e-08	-	-	-	-	-	Glycosyltransferase OS=Rosa chinensis OX=74649 GN=RchiOBHm_Chr6g0248421 PE=3 SV=1	474.26	973.929	1131.53	3787.14	3346.55	2908.07
FvH4_2g03350	37.3836	2.40735	0.946365	2.54379	0.0109658	0.0414902	gi|470106834|ref|XP_004289763.1|	PREDICTED: thymocyte nuclear protein 1-like [Fragaria vesca subsp. vesca]	THYN1_RAT	Thymocyte nuclear protein 1 OS=Rattus norvegicus OX=10116 GN=Thyn1 PE=2 SV=1	AT2G14660.1	Putative PUA-like domain-containing protein OS=Rosa chinensis OX=74649 GN=RchiOBHm_Chr6g0248511 PE=4 SV=1	25.6357	33.1799	7.19003	85.6011	210.815	53.2839
FvH4_2g03461	345.903	1.28375	0.269522	4.76307	1.90673e-06	2.24672e-05	-	-	FDL1_ARATH	F-box/FBD/LRR-repeat protein At1g13570 OS=Arabidopsis thaliana OX=3702 GN=At1g13570 PE=2 SV=1	AT1G13570.3	Putative F-box domain, FBD domain, leucine-rich repeat domain, L domain-containing protein OS=Rosa chinensis OX=74649 GN=RchiOBHm_Chr6g0248681 PE=4 SV=1	358.9	285.933	286.703	827.791	830.547	608.666
FvH4_2g03522	14897.9	-2.66819	0.258764	-10.3113	6.26704e-25	9.40578e-23	-	-	SCP18_ARATH	Serine carboxypeptidase-like 18 OS=Arabidopsis thaliana OX=3702 GN=SCPL18 PE=2 SV=2	AT1G33540.1	Putative peptidase S10, serine carboxypeptidase, alpha/Beta hydrolase OS=Rosa chinensis OX=74649 GN=RchiOBHm_Chr6g0248941 PE=3 SV=1	7197.22	7387.42	8058.23	981.12	1421.68	1159.95
FvH4_2g03523	13508.9	-2.54585	0.262017	-9.71635	2.56831e-22	2.82309e-20	-	-	SCP18_ARATH	Serine carboxypeptidase-like 18 OS=Arabidopsis thaliana OX=3702 GN=SCPL18 PE=2 SV=2	AT1G33540.2	Putative peptidase S10, serine carboxypeptidase, alpha/Beta hydrolase OS=Rosa chinensis OX=74649 GN=RchiOBHm_Chr6g0248961 PE=3 SV=1	9271.57	10168.7	12412.7	1552.11	2097.56	1805.5
FvH4_2g03550	15899.8	-2.73589	0.263351	-10.3887	2.79007e-25	4.38415e-23	-	-	-	-	-	Putative peptidase S10, serine carboxypeptidase, alpha/Beta hydrolase OS=Rosa chinensis OX=74649 GN=RchiOBHm_Chr6g0249011 PE=3 SV=1	13358.3	13840.9	16168.6	1789.16	2173.83	2547.38
FvH4_2g03560	2486.36	-1.78687	0.24898	-7.17676	7.13852e-13	2.44348e-11	-	-	-	-	-	Putative peptidase S10, serine carboxypeptidase, alpha/Beta hydrolase OS=Rosa chinensis OX=74649 GN=RchiOBHm_Chr6g0249091 PE=3 SV=1	3049.58	3224.31	2858.04	654.707	1203.45	789.011
FvH4_2g03570	7178.48	-2.41551	0.263435	-9.16929	4.76165e-20	3.93939e-18	-	-	-	-	-	Putative peptidase S10, serine carboxypeptidase, alpha/Beta hydrolase OS=Rosa chinensis OX=74649 GN=RchiOBHm_Chr6g0252491 PE=3 SV=1	4204.25	4600.3	5365.56	614.258	976.741	1065.68
FvH4_2g03581	1584.54	-2.72571	0.262171	-10.3967	2.56753e-25	4.08937e-23	-	-	-	-	-	Putative photosystem I reaction centre subunit N OS=Rosa chinensis OX=74649 GN=RchiOBHm_Chr6g0252541 PE=4 SV=1	2259.15	2005.43	2622.56	275.617	459.767	306.382
FvH4_2g03600	511.569	-2.89637	0.464353	-6.23743	4.44814e-10	9.9185e-09	-	-	-	-	-	Putative histone acetyltransferase chromatin regulator PHD family OS=Rosa chinensis OX=74649 GN=RchiOBHm_Chr6g0252611 PE=4 SV=1	145.269	123.937	133.016	35.7455	8.47497	9.22221
FvH4_2g03650	346.365	-1.56379	0.52926	-2.95467	0.00313001	0.0148737	gi|764547535|ref|XP_011459680.1|	PREDICTED: nucleobase-ascorbate transporter 4 [Fragaria vesca subsp. vesca]	NAT4_ARATH	Nucleobase-ascorbate transporter 4 OS=Arabidopsis thaliana OX=3702 GN=NAT4 PE=2 SV=2	AT1G49960.1	Putative xanthine/uracil/vitamin C permease OS=Rosa chinensis OX=74649 GN=RchiOBHm_Chr6g0252651 PE=4 SV=1	187.995	632.371	503.302	161.795	161.024	125.012
FvH4_2g03791	1015.91	-4.47091	0.43449	-10.29	7.81721e-25	1.12285e-22	gi|764524998|ref|XP_011457852.1|	PREDICTED: uncharacterized protein LOC101309796 [Fragaria vesca subsp. vesca]	XYN5L_ARATH	Endo-1,4-beta-xylanase 5-like OS=Arabidopsis thaliana OX=3702 GN=At4g33820 PE=2 SV=1	AT4G33820.1	Putative endo-1,4-beta-xylanase OS=Rosa chinensis OX=74649 GN=RchiOBHm_Chr6g0252821 PE=4 SV=1	1283.92	825.595	877.184	16.9321	38.1374	79.9258
FvH4_2g04020	396.587	-1.06945	0.268576	-3.98195	6.8352e-05	0.000556248	gi|470106898|ref|XP_004289792.1|	PREDICTED: methionyl-tRNA formyltransferase, mitochondrial [Fragaria vesca subsp. vesca]	-	-	-	Putative methionyl-tRNA formyltransferase OS=Rosa chinensis OX=74649 GN=RchiOBHm_Chr3g0493551 PE=3 SV=1	474.26	458.664	577.899	251.159	201.281	267.444
FvH4_2g04120	343.767	2.28307	0.601468	3.79583	0.000147149	0.00109232	gi|470106914|ref|XP_004289800.1|	PREDICTED: zinc finger protein ZAT10 [Fragaria vesca subsp. vesca]	ZAT10_ARATH	Zinc finger protein ZAT10 OS=Arabidopsis thaliana OX=3702 GN=ZAT10 PE=2 SV=1	AT1G27730.1	Putative transcription factor C2H2 family OS=Rosa chinensis OX=74649 GN=RchiOBHm_Chr6g0253491 PE=4 SV=1	79.0434	208.838	183.346	914.332	844.319	535.913
FvH4_2g04390	1013.54	-1.13011	0.307916	-3.67018	0.000242382	0.00169451	-	-	-	-	-	-	1323.44	1075.42	1340.94	440.234	792.41	476.481
FvH4_2g04502	343.694	3.26076	0.593073	5.49808	3.83958e-08	6.24712e-07	-	-	-	-	-	Uncharacterized protein OS=Rosa chinensis OX=74649 GN=RchiOBHm_Chr6g0254061 PE=4 SV=1	164.496	146.382	138.408	1292.48	1525.5	1487.85
FvH4_2g04560	775.066	1.2316	0.217315	5.66738	1.45e-08	2.56218e-07	-	-	-	-	-	Uncharacterized protein OS=Rosa chinensis OX=74649 GN=RchiOBHm_Chr6g0254141 PE=3 SV=1	529.804	661.647	426.009	1301.89	1417.44	1077.97
FvH4_2g04580	3013.53	-2.27671	0.296955	-7.66687	1.76243e-14	7.40821e-13	-	-	-	-	-	Putative 3-oxo-5-beta-steroid 4-dehydrogenase OS=Rosa chinensis OX=74649 GN=RchiOBHm_Chr6g0254181 PE=4 SV=1	1469.78	1899.06	1839.75	396.963	425.867	252.074
FvH4_2g04630	10683.4	1.34085	0.394661	3.39749	0.000680079	0.00412542	-	-	-	-	-	Uncharacterized protein OS=Prunus persica OX=3760 GN=PRUPE_8G139000 PE=4 SV=1	3050.65	3013.52	2606.39	6279.92	5840.32	9842.15
FvH4_2g04680	4347.29	1.37148	0.224249	6.11585	9.60419e-10	2.03865e-08	-	-	-	-	-	Putative gibberellin regulated protein OS=Rosa chinensis OX=74649 GN=RchiOBHm_Chr6g0254301 PE=4 SV=1	1634.28	1747.8	1866.71	3461.67	4894.3	5225.92
FvH4_2g04750	4309.61	5.66837	0.386838	14.6531	1.28728e-48	2.31839e-45	gi|470106792|ref|XP_004289743.1|	PREDICTED: probable indole-3-acetic acid-amido synthetase GH3.1 [Fragaria vesca subsp. vesca]	GH31_ARATH	Probable indole-3-acetic acid-amido synthetase GH3.1 OS=Arabidopsis thaliana OX=3702 GN=GH3.1 PE=2 SV=1	AT2G14960.1	Putative GH3 family protein OS=Rosa chinensis OX=74649 GN=RchiOBHm_Chr6g0254401 PE=4 SV=1	469.988	452.809	397.249	26711.3	17739.2	22676.4
FvH4_2g04790	226.731	-2.2574	0.583428	-3.8692	0.000109193	0.000841794	-	-	ZFP7_ARATH	Zinc finger protein 7 OS=Arabidopsis thaliana OX=3702 GN=ZFP7 PE=1 SV=1	AT1G24625.1	Putative transcription factor C2H2 family OS=Rosa chinensis OX=74649 GN=RchiOBHm_Chr6g0254511 PE=4 SV=1	455.033	300.571	372.084	82.7791	40.2561	112.716
FvH4_2g04810	1770.31	1.75586	0.24268	7.23532	4.64433e-13	1.64256e-11	-	-	FUCO2_ARATH	Alpha-L-fucosidase 2 OS=Arabidopsis thaliana OX=3702 GN=FUC95A PE=1 SV=1	AT4G34260.1	Putative glycosidase OS=Rosa chinensis OX=74649 GN=RchiOBHm_Chr6g0254541 PE=4 SV=1	1223.04	981.736	979.642	3606.53	4808.49	2338.34
FvH4_2g05000	95.9718	2.56747	0.735501	3.49078	0.000481608	0.00309352	gi|470136563|ref|XP_004304056.1|	PREDICTED: uncharacterized protein LOC101291846 [Fragaria vesca subsp. vesca]	-	-	-	Uncharacterized protein OS=Rosa chinensis OX=74649 GN=RchiOBHm_Chr6g0244521 PE=4 SV=1	10.6815	68.3116	86.2804	622.724	309.337	49.1851
FvH4_2g05020	285.704	3.15466	0.442184	7.13428	9.72953e-13	3.26826e-11	gi|470136561|ref|XP_004304055.1|	PREDICTED: uncharacterized protein LOC101291548 [Fragaria vesca subsp. vesca]	BSP_BOSSE	Basic secretory protease (Fragments) OS=Boswellia serrata OX=613112 PE=1 SV=1	AT2G15220.1	Uncharacterized protein OS=Rosa chinensis OX=74649 GN=RchiOBHm_Chr6g0254831 PE=4 SV=1	93.9975	130.768	115.041	1235.1	1181.2	610.715
FvH4_2g05060	3116.2	1.03448	0.250318	4.13269	3.58542e-05	0.000315941	gi|470136553|ref|XP_004304051.1|	PREDICTED: putative UDP-glucose glucosyltransferase [Fragaria vesca subsp. vesca]	UGT_FRAAN	Putative UDP-glucose glucosyltransferase OS=Fragaria ananassa OX=3747 GN=GT5 PE=2 SV=1	AT4G15480.1	Glycosyltransferase OS=Rosa chinensis OX=74649 GN=RchiOBHm_Chr6g0254941 PE=3 SV=1	1325.58	1199.36	1531.48	3256.6	1868.73	3183.71
FvH4_2g05090	26575.3	-1.22499	0.282885	-4.33035	1.48875e-05	0.000144992	gi|75288886|sp|Q66PF4.1|CGT_FRAAN	Recname: Full=Cinnamate beta-D-glucosyltransferase; Altname: Full=UDP-glucose:cinnamate glucosyltransferase; Short=FaGT2 >gi|51705411|gb|AAU09443.1| UDP-glucose glucosyltransferase [Fragaria x ananassa]	CGT_FRAAN	Cinnamate beta-D-glucosyltransferase OS=Fragaria ananassa OX=3747 GN=GT2 PE=1 SV=1	AT4G15480.1	Glycosyltransferase OS=Fragaria vesca OX=57918 GN=GT2 PE=2 SV=1	9568.52	12963.6	11224.5	4666.67	4884.76	4889.82
FvH4_2g05120	248.282	-1.14932	0.319653	-3.59553	0.000323735	0.00218141	gi|470140462|ref|XP_004305959.1|	PREDICTED: RNA pseudouridine synthase 4, mitochondrial [Fragaria vesca subsp. vesca]	PUS4_ARATH	RNA pseudouridine synthase 4, mitochondrial OS=Arabidopsis thaliana OX=3702 GN=At3g19440 PE=2 SV=1	AT3G19440.1	Putative 23S rRNA pseudouridine(955/2504/2580) synthase OS=Rosa chinensis OX=74649 GN=RchiOBHm_Chr6g0255041 PE=4 SV=1	314.037	191.273	351.413	156.151	137.718	92.2221
FvH4_2g05134	13.6035	3.82565	1.55025	2.46777	0.013596	0.049337	gi|1366028748|ref|XP_024166797.1|	probable cinnamyl alcohol dehydrogenase 1 isoform X2 [Rosa chinensis]	CADH1_ARACO	Probable cinnamyl alcohol dehydrogenase 1 OS=Aralia cordata OX=29746 GN=CAD1 PE=2 SV=1	AT4G34230.1	Putative cinnamyl-alcohol dehydrogenase OS=Rosa chinensis OX=74649 GN=RchiOBHm_Chr6g0255071 PE=3 SV=1	0	1.95176	0	15.0507	9.53434	3.07407
FvH4_2g05270	1361.54	1.13817	0.27476	4.14241	3.43671e-05	0.000304786	gi|470140448|ref|XP_004305952.1|	PREDICTED: probable LRR receptor-like serine/threonine-protein kinase At4g37250 [Fragaria vesca subsp. vesca]	RPKL_ARATH	Receptor protein kinase-like protein At4g34220 OS=Arabidopsis thaliana OX=3702 GN=At4g34220 PE=2 SV=1	-	Uncharacterized protein OS=Rosa chinensis OX=74649 GN=RchiOBHm_Chr6g0255401 PE=4 SV=1	643.029	722.152	661.483	1416.65	1214.04	1830.1
FvH4_2g05290	845.621	1.79323	0.355559	5.0434	4.57326e-07	6.10803e-06	gi|470140446|ref|XP_004305951.1|	PREDICTED: probable carbohydrate esterase At4g34215 [Fragaria vesca subsp. vesca]	CAES_ARATH	Probable carbohydrate esterase At4g34215 OS=Arabidopsis thaliana OX=3702 GN=At4g34215 PE=1 SV=2	-	Putative SGNH hydrolase-type esterase domain-containing protein OS=Rosa chinensis OX=74649 GN=RchiOBHm_Chr6g0255421 PE=4 SV=1	442.216	567.962	506.897	1497.55	2648.43	1112.81
FvH4_2g05321	4739.29	-1.54099	0.292656	-5.26554	1.39781e-07	2.06089e-06	gi|764613025|ref|XP_011467746.1|	PREDICTED: stress enhanced protein 1, chloroplastic [Fragaria vesca subsp. vesca]	-	-	-	Uncharacterized protein OS=Rosa chinensis OX=74649 GN=RchiOBHm_Chr6g0255531 PE=4 SV=1	5709.28	5338.07	6909.62	1624.54	2734.24	1812.68
FvH4_2g05350	1701.79	1.11467	0.322779	3.45334	0.000553686	0.00346524	gi|470136519|ref|XP_004304038.1|	PREDICTED: leucine-rich repeat receptor-like serine/threonine-protein kinase BAM1 [Fragaria vesca subsp. vesca]	-	-	-	Putative leucine-rich repeat domain, L domain-containing protein OS=Rosa chinensis OX=74649 GN=RchiOBHm_Chr6g0255611 PE=4 SV=1	657.983	745.573	730.687	1896.39	982.037	1743
FvH4_2g05460	2712.64	-1.1105	0.29314	-3.78831	0.000151672	0.00112235	gi|470136509|ref|XP_004304033.1|	PREDICTED: cyclin-D3-1 [Fragaria vesca subsp. vesca]	-	-	-	Putative cyclin B3, G2/mitotic-specific OS=Rosa chinensis OX=74649 GN=RchiOBHm_Chr6g0255741 PE=3 SV=1	5230.75	3961.1	3195.97	1567.16	2050.94	2119.06
FvH4_2g05560	86.8512	-1.11689	0.438996	-2.54419	0.0109531	0.0414558	gi|470140432|ref|XP_004305944.1|	PREDICTED: protein IRX15-LIKE-like [Fragaria vesca subsp. vesca]	IX15L_ARATH	Protein IRX15-LIKE OS=Arabidopsis thaliana OX=3702 GN=IRX15-L PE=2 SV=1	-	Putative polysaccharide biosynthesis domain-containing protein OS=Rosa chinensis OX=74649 GN=RchiOBHm_Chr6g0255871 PE=4 SV=1	51.2714	100.516	80.8879	35.7455	27.5437	44.0617
FvH4_2g05603	1042.12	1.13471	0.245153	4.62857	3.68205e-06	4.10709e-05	gi|764612926|ref|XP_004304025.2|	PREDICTED: UDP-glucose flavonoid 3-O-glucosyltransferase 7-like [Fragaria vesca subsp. vesca]	UFOG7_FRAAN	UDP-glucose flavonoid 3-O-glucosyltransferase 7 OS=Fragaria ananassa OX=3747 GN=GT7 PE=1 SV=1	AT4G34131.1	Glycosyltransferase OS=Rosa chinensis OX=74649 GN=RchiOBHm_Chr6g0256331 PE=3 SV=1	230.721	152.237	329.843	582.276	385.611	598.419
FvH4_2g05663	90.3988	-1.8912	0.688002	-2.74883	0.00598083	0.0252441	gi|764621236|ref|XP_011468623.1|	PREDICTED: UDP-glucose flavonoid 3-O-glucosyltransferase 7-like [Fragaria vesca subsp. vesca]	UFOG7_FRAAN	UDP-glucose flavonoid 3-O-glucosyltransferase 7 OS=Fragaria ananassa OX=3747 GN=GT7 PE=1 SV=1	AT4G34131.1	Putative flavonol 3-O-glucosyltransferase OS=Rosa chinensis OX=74649 GN=RchiOBHm_Chr6g0256471 PE=3 SV=1	38.4535	27.3247	8.98754	7.52537	6.35623	6.14814
FvH4_2g05700	95.4378	-2.54723	0.411587	-6.1888	6.0622e-10	1.32278e-08	gi|470140418|ref|XP_004305937.1|	PREDICTED: abscisate beta-glucosyltransferase-like [Fragaria vesca subsp. vesca]	AOG_PHAAN	Abscisate beta-glucosyltransferase OS=Phaseolus angularis OX=3914 GN=AOG PE=1 SV=1	AT2G15480.1	Putative UDP-glucuronosyl/UDP-glucosyltransferase OS=Rosa chinensis OX=74649 GN=RchiOBHm_Chr6g0256571 PE=4 SV=1	211.494	173.707	188.738	35.7455	25.4249	36.8888
FvH4_2g05820	481.146	1.06751	0.362908	2.94154	0.00326589	0.0154038	-	-	PUB26_ARATH	U-box domain-containing protein 26 OS=Arabidopsis thaliana OX=3702 GN=PUB26 PE=2 SV=1	-	RING-type E3 ubiquitin transferase OS=Rosa chinensis OX=74649 GN=RchiOBHm_Chr6g0257831 PE=4 SV=1	397.353	472.326	438.592	946.315	1080.56	715.234
FvH4_2g05880	661.555	-1.11748	0.161179	-6.93315	4.11559e-12	1.25959e-10	-	-	-	-	-	Uncharacterized protein OS=Rosa chinensis OX=74649 GN=RchiOBHm_Chr6g0257661 PE=4 SV=1	984.838	837.305	868.197	374.387	472.48	393.481
FvH4_2g05920	61.1636	-2.88148	1.11519	-2.58384	0.00977059	0.0377677	gi|470117305|ref|XP_004294801.1|	PREDICTED: uncharacterized protein LOC101292781 isoform X1 [Fragaria vesca subsp. vesca]	-	-	-	Uncharacterized protein OS=Rosa chinensis OX=74649 GN=RchiOBHm_Chr6g0257491 PE=4 SV=1	19.2268	5.85528	5.39253	0	4.23749	0
FvH4_2g05950	195.694	1.61761	0.386749	4.18259	2.88203e-05	0.00026043	-	-	-	-	-	Putative leucine-rich repeat-containing, plant-type, leucine-rich repeat domain, L OS=Rosa chinensis OX=74649 GN=RchiOBHm_Chr6g0257441 PE=4 SV=1	126.042	182.49	82.6854	443.056	260.605	495.95
FvH4_2g06010	154.942	2.13748	0.579959	3.68558	0.000228182	0.00161111	gi|470117314|ref|XP_004294805.1|	PREDICTED: abscisic acid 8'-hydroxylase 4 [Fragaria vesca subsp. vesca]	ABAH4_ARATH	Abscisic acid 8'-hydroxylase 4 OS=Arabidopsis thaliana OX=3702 GN=CYP707A4 PE=2 SV=2	AT3G19270.2	Putative (+)-abscisic acid 8'-hydroxylase OS=Rosa chinensis OX=74649 GN=RchiOBHm_Chr6g0257401 PE=3 SV=1	89.7249	93.6845	93.4704	388.497	243.655	586.123
FvH4_2g06030	2044.31	3.09011	0.366076	8.44117	3.1417e-17	1.83892e-15	-	-	AMYA_VIGMU	Alpha-amylase OS=Vigna mungo OX=3915 GN=AMY1.1 PE=2 SV=1	AT4G25000.1	Alpha-amylase OS=Rosa chinensis OX=74649 GN=RchiOBHm_Chr6g0257251 PE=3 SV=1	741.299	1280.36	835.841	11656.8	7498.23	5178.78
FvH4_2g06050	33.9098	5.73329	1.89385	3.02732	0.00246732	0.0122311	-	-	EF109_ARATH	Ethylene-responsive transcription factor ERF109 OS=Arabidopsis thaliana OX=3702 GN=ERF109 PE=1 SV=1	AT4G34410.1	Putative transcription factor AP2-EREBP family OS=Rosa chinensis OX=74649 GN=RchiOBHm_Chr6g0257181 PE=4 SV=1	0	0	0	0	2.11874	26.6419
FvH4_2g06060	78.992	6.97117	2.49433	2.7948	0.00519317	0.0225538	-	-	EF109_ARATH	Ethylene-responsive transcription factor ERF109 OS=Arabidopsis thaliana OX=3702 GN=ERF109 PE=1 SV=1	AT4G34410.1	Putative transcription factor AP2-EREBP family OS=Rosa chinensis OX=74649 GN=RchiOBHm_Chr6g0257181 PE=4 SV=1	0	0	0	0	4.23749	63.5308
FvH4_2g06120	249.595	1.2345	0.38282	3.22476	0.0012608	0.00700831	-	-	Y2451_ARATH	Leucine-rich repeat receptor-like serine/threonine-protein kinase At2g14510 OS=Arabidopsis thaliana OX=3702 GN=At2g14510 PE=1 SV=1	AT3G19230.1	Putative non-specific serine/threonine protein kinase OS=Rosa chinensis OX=74649 GN=RchiOBHm_Chr6g0257071 PE=4 SV=1	149.542	189.321	307.374	496.674	519.092	506.197
FvH4_2g06340	2356.86	-1.07704	0.194007	-5.55154	2.83172e-08	4.73226e-07	gi|470117361|ref|XP_004294827.1|	PREDICTED: uncharacterized protein LOC101300802 [Fragaria vesca subsp. vesca]	-	-	AT2G15695.1	Putative alpha/Beta hydrolase OS=Rosa chinensis OX=74649 GN=RchiOBHm_Chr6g0258221 PE=4 SV=1	3014.33	2359.68	3228.32	1491.9	1091.15	1494
FvH4_2g06430	156.229	1.95792	0.424672	4.61043	4.01839e-06	4.45046e-05	gi|470117371|ref|XP_004294832.1|	PREDICTED: probable carboxylesterase 12 [Fragaria vesca subsp. vesca]	CXE12_ARATH	Probable carboxylesterase 12 OS=Arabidopsis thaliana OX=3702 GN=CXE12 PE=1 SV=1	AT3G48690.1	Putative carboxylesterase OS=Rosa chinensis OX=74649 GN=RchiOBHm_Chr6g0258271 PE=4 SV=1	131.383	99.5398	131.218	380.972	638.801	387.333
FvH4_2g06460	455.181	-2.07848	0.255515	-8.1345	4.13656e-16	2.11461e-14	gi|470119965|ref|XP_004296080.1|	PREDICTED: auxin-binding protein ABP19b-like isoform X1 [Fragaria vesca subsp. vesca]	AB19B_PRUPE	Auxin-binding protein ABP19b OS=Prunus persica OX=3760 GN=ABP19B PE=3 SV=1	AT5G20630.1	Putative germin OS=Rosa chinensis OX=74649 GN=RchiOBHm_Chr2g0094791 PE=3 SV=1	808.592	869.51	679.458	180.609	133.481	243.876
FvH4_2g06480	1324.06	-1.4287	0.266278	-5.36542	8.07595e-08	1.23664e-06	gi|470117375|ref|XP_004294834.1|	PREDICTED: probable carboxylesterase 12 [Fragaria vesca subsp. vesca]	CXE13_ARATH	Probable carboxylesterase 13 OS=Arabidopsis thaliana OX=3702 GN=CXE13 PE=1 SV=1	AT3G48700.1	Putative carboxylesterase OS=Rosa chinensis OX=74649 GN=RchiOBHm_Chr6g0258321 PE=4 SV=1	2266.62	1540.92	2120.16	727.139	726.729	748.024
FvH4_2g06540	1127.93	-2.72789	0.377289	-7.23023	4.82165e-13	1.70014e-11	gi|470117383|ref|XP_004294838.1|	PREDICTED: 2-hydroxyisoflavanone dehydratase-like [Fragaria vesca subsp. vesca]	HidM_GLYEC	2-hydroxyisoflavanone dehydratase OS=Glycyrrhiza echinata OX=46348 GN=HidM PE=1 SV=1	AT1G19190.1	Putative carboxylesterase, 2-hydroxyisoflavanone dehydratase OS=Rosa chinensis OX=74649 GN=RchiOBHm_Chr6g0258461 PE=4 SV=1	393.081	528.927	428.706	39.5082	88.9872	75.8271
FvH4_2g06620	1383.81	-2.00121	0.345228	-5.79677	6.76049e-09	1.26022e-07	gi|470119977|ref|XP_004296086.1|	PREDICTED: probable carboxylesterase 5 [Fragaria vesca subsp. vesca]	-	-	-	Putative carboxylesterase, 2-hydroxyisoflavanone dehydratase OS=Rosa chinensis OX=74649 GN=RchiOBHm_Chr6g0258681 PE=4 SV=1	467.851	603.094	571.608	112.881	139.837	157.802
FvH4_2g06740	29.2758	4.28305	0.955936	4.48047	7.44772e-06	7.82294e-05	gi|764548057|ref|XP_011459752.1|	PREDICTED: uncharacterized protein LOC105350078 [Fragaria vesca subsp. vesca]	-	-	-	Uncharacterized protein OS=Rosa chinensis OX=74649 GN=RchiOBHm_Chr6g0258931 PE=4 SV=1	10.6815	7.80704	5.39253	150.507	167.381	145.506
FvH4_2g06770	53.4681	5.54593	0.949257	5.8424	5.14551e-09	9.79446e-08	gi|764530879|ref|XP_011458323.1|	PREDICTED: uncharacterized protein LOC101293152 [Fragaria vesca subsp. vesca]	-	-	-	Putative cupredoxin OS=Rosa chinensis OX=74649 GN=RchiOBHm_Chr6g0258941 PE=4 SV=1	0	7.80704	8.98754	255.863	203.399	334.049
FvH4_2g06780	52.4535	3.1122	1.11968	2.77955	0.00544346	0.0234193	gi|470108080|ref|XP_004290363.1|	PREDICTED: uncharacterized protein LOC101291778 [Fragaria vesca subsp. vesca]	-	-	AT2G15780.1	Putative cupredoxin OS=Rosa chinensis OX=74649 GN=RchiOBHm_Chr6g0259001 PE=4 SV=1	2.13631	13.6623	0	52.6776	52.9686	30.7407
FvH4_2g06840	32.8956	4.02947	0.859135	4.69014	2.73016e-06	3.1288e-05	gi|764548062|ref|XP_011459753.1|	PREDICTED: uncharacterized protein LOC105350079 [Fragaria vesca subsp. vesca]	YPF17_PLAF7	Protein PF14_0175 OS=Plasmodium falciparum (isolate 3D7) OX=36329 GN=PF14_0175 PE=1 SV=1	AT2G26520.1	Uncharacterized protein OS=Rosa chinensis OX=74649 GN=RchiOBHm_Chr6g0259071 PE=4 SV=1	19.2268	3.90352	1.79751	127.931	108.056	166
FvH4_2g06960	187.308	-3.50648	0.42495	-8.2515	1.56425e-16	8.47773e-15	-	-	Y3123_ORYSJ	B3 domain-containing protein Os03g0212300 OS=Oryza sativa subsp. japonica OX=39947 GN=Os03g0212300 PE=2 SV=1	AT4G31640.1	Putative transcription factor B3-Domain family OS=Rosa chinensis OX=74649 GN=RchiOBHm_Chr6g0259321 PE=4 SV=1	158.087	111.25	133.016	9.40671	16.9499	9.22221
FvH4_2g07081	3020.85	-1.60609	0.416176	-3.85917	0.00011377	0.000871632	-	-	-	-	-	Putative oxoglutarate/iron-dependent dioxygenase, non-heme dioxygenase domain-containing protein OS=Rosa chinensis OX=74649 GN=RchiOBHm_Chr6g0259531 PE=3 SV=1	3856.04	6609.64	5757.42	2075.12	2114.51	1139.46
FvH4_2g07230	48.6109	-3.24677	0.62839	-5.16682	2.38117e-07	3.35845e-06	gi|764548070|ref|XP_011459754.1|	PREDICTED: B3 domain-containing protein Os01g0723500-like [Fragaria vesca subsp. vesca]	Y1235_ORYSJ	B3 domain-containing protein Os01g0723500 OS=Oryza sativa subsp. japonica OX=39947 GN=Os01g0723500 PE=3 SV=1	AT3G06220.1	Putative transcription factor B3-Domain family OS=Rosa chinensis OX=74649 GN=RchiOBHm_Chr6g0259781 PE=4 SV=1	67.2937	50.7458	73.6978	5.64403	8.47497	6.14814
FvH4_2g07231	1219.9	-2.18552	0.211696	-10.3239	5.49727e-25	8.30371e-23	gi|470108143|ref|XP_004290390.1|	PREDICTED: putative B3 domain-containing protein Os03g0621600 isoform X2 [Fragaria vesca subsp. vesca]	Y4158_ARATH	B3 domain-containing protein At4g01580 OS=Arabidopsis thaliana OX=3702 GN=At4g01580 PE=2 SV=1	AT4G01580.1	Putative transcription factor B3-Domain family OS=Rosa chinensis OX=74649 GN=RchiOBHm_Chr6g0259791 PE=4 SV=1	684.687	474.278	434.098	107.237	128.184	114.765
FvH4_2g07300	1710.72	-1.41169	0.450466	-3.13383	0.00172539	0.00912505	-	-	Y3216_ORYSJ	Putative B3 domain-containing protein Os03g0621600 OS=Oryza sativa subsp. japonica OX=39947 GN=Os03g0621600 PE=3 SV=1	AT5G66980.1	Putative transcription factor B3-Domain family OS=Rosa chinensis OX=74649 GN=RchiOBHm_Chr6g0259881 PE=4 SV=1	108.952	29.2764	68.3053	13.1694	33.8999	30.7407
FvH4_2g07330	2997.27	-2.82753	0.250114	-11.305	1.23984e-29	3.08812e-27	-	-	PETM_SPIOL	Cytochrome b6-f complex subunit 7 (Fragment) OS=Spinacia oleracea OX=3562 GN=petM PE=1 SV=1	AT2G26500.2	Putative PetM of cytochrome b6/f complex subunit 7 OS=Rosa chinensis OX=74649 GN=RchiOBHm_Chr3g0487591 PE=3 SV=1	4073.94	3538.54	4968.31	528.657	559.348	684.493
FvH4_2g07340	345.052	-2.39123	0.428685	-5.57807	2.43203e-08	4.12617e-07	-	-	TM45B_BOVIN	Transmembrane protein 45B OS=Bos taurus OX=9913 GN=TMEM45B PE=2 SV=1	AT1G49470.1	Uncharacterized protein OS=Prunus persica OX=3760 GN=PRUPE_8G112800 PE=4 SV=1	1087.38	927.086	631.824	218.236	157.846	128.086
FvH4_2g07410	32.6513	-7.79483	1.45888	-5.34302	9.14126e-08	1.38797e-06	-	-	-	-	-	Putative hydroperoxide dehydratase OS=Rosa chinensis OX=74649 GN=RchiOBHm_Chr6g0260901 PE=3 SV=1	33.1128	14.6382	75.4954	0	0	0
FvH4_2g07450	7385.72	-1.89597	0.269866	-7.02559	2.13163e-12	6.73521e-11	-	-	-	-	-	Putative long-chain-fatty-acid--CoA ligase OS=Rosa chinensis OX=74649 GN=RchiOBHm_Chr6g0261981 PE=4 SV=1	6584.1	8647.28	10901.9	2280.19	2493.76	2248.17
FvH4_2g07730	160.143	-2.64349	0.84607	-3.12443	0.00178151	0.00935204	gi|470106548|ref|XP_004289630.1|	PREDICTED: uncharacterized protein LOC101309404 [Fragaria vesca subsp. vesca]	-	-	AT2G16050.1	Putative chromatin regulator PHD family OS=Rosa chinensis OX=74649 GN=RchiOBHm_Chr6g0262061 PE=4 SV=1	117.497	62.4564	77.2929	24.4575	4.23749	12.2963
FvH4_2g07870	3411.93	-2.09525	0.210968	-9.9316	3.0335e-23	3.60524e-21	gi|470106682|ref|XP_004289691.1|	PREDICTED: protein TIC 62, chloroplastic [Fragaria vesca subsp. vesca]	TIC62_ARATH	Protein TIC 62, chloroplastic OS=Arabidopsis thaliana OX=3702 GN=TIC62 PE=1 SV=1	AT3G18890.1	Uncharacterized protein OS=Prunus persica OX=3760 GN=PRUPE_8G106300 PE=4 SV=1	5139.96	4881.35	5814.94	1185.25	940.722	1580.07
FvH4_2g07871	26.3912	-3.78375	0.826559	-4.57771	4.70091e-06	5.1383e-05	gi|764547339|ref|XP_004292045.2|	PREDICTED: very-long-chain enoyl-CoA reductase-like [Fragaria vesca subsp. vesca]	-	-	-	Putative 3-oxo-5-alpha-steroid 4-dehydrogenase (NADP(+)) OS=Rosa chinensis OX=74649 GN=RchiOBHm_Chr6g0262351 PE=4 SV=1	36.3172	31.2282	86.2804	1.88134	5.29686	4.09876
FvH4_2g07950	865.479	-2.07902	0.226528	-9.17776	4.40145e-20	3.69359e-18	gi|470111618|ref|XP_004292042.1|	PREDICTED: cytochrome c biogenesis protein CCS1, chloroplastic [Fragaria vesca subsp. vesca]	-	-	-	Putative ResB-like domain-containing protein OS=Rosa chinensis OX=74649 GN=RchiOBHm_Chr6g0262411 PE=3 SV=1	1239.06	1265.72	1097.38	269.032	298.743	284.864
FvH4_2g08020	58.6678	-3.83509	0.677438	-5.66117	1.50345e-08	2.65061e-07	gi|764523789|ref|XP_011457754.1|	PREDICTED: uncharacterized protein LOC101302903, partial [Fragaria vesca subsp. vesca]	-	-	-	Uncharacterized protein OS=Prunus persica OX=3760 GN=PRUPE_8G104800 PE=4 SV=1	103.611	63.4322	93.4704	5.64403	12.7125	0
FvH4_2g08090	428.613	-1.39356	0.312161	-4.46424	8.03522e-06	8.38737e-05	gi|764523100|ref|XP_004291998.2|	PREDICTED: uncharacterized protein LOC101310288 isoform X1 [Fragaria vesca subsp. vesca]	U496B_ARATH	UPF0496 protein At4g34330 OS=Arabidopsis thaliana OX=3702 GN=At4g34330 PE=3 SV=1	AT4G34330.1	Uncharacterized protein OS=Rosa chinensis OX=74649 GN=RchiOBHm_Chr0c38g0503051 PE=4 SV=1	303.356	181.514	221.094	58.3216	77.3341	133.21
FvH4_2g08100	614.26	2.13076	0.483364	4.4082	1.04232e-05	0.000106017	gi|470111528|ref|XP_004291999.1|	PREDICTED: UPF0496 protein At4g34320-like [Fragaria vesca subsp. vesca]	U496A_ARATH	UPF0496 protein At4g34320 OS=Arabidopsis thaliana OX=3702 GN=At4g34320 PE=2 SV=1	AT4G34320.2	Uncharacterized protein OS=Rosa chinensis OX=74649 GN=RchiOBHm_Chr0c38g0503041 PE=4 SV=1	138.86	184.441	91.6729	664.114	429.046	723.431
FvH4_2g08260	293.276	-1.56984	0.271684	-5.7782	7.55047e-09	1.39857e-07	-	-	GBF1_ARATH	G-box-binding factor 1 OS=Arabidopsis thaliana OX=3702 GN=GBF1 PE=1 SV=2	AT4G36730.2	Putative transcription factor bZIP family OS=Rosa chinensis OX=74649 GN=RchiOBHm_Chr6g0263141 PE=4 SV=1	378.126	341.558	474.542	95.9485	177.974	129.111
FvH4_2g08340	6.87558	-6.40658	2.11145	-3.03421	0.00241167	0.0119984	-	-	GLOX_VITPS	Aldehyde oxidase GLOX OS=Vitis pseudoreticulata OX=231512 GN=GLOX PE=2 SV=1	-	Putative galactose oxidase OS=Rosa chinensis OX=74649 GN=RchiOBHm_Chr6g0263301 PE=4 SV=1	10.6815	29.2764	7.19003	0	0	0
FvH4_2g08490	4.35215	-5.67649	2.2776	-2.49232	0.0126913	0.0468234	-	-	-	-	-	Putative BURP domain-containing protein OS=Rosa chinensis OX=74649 GN=RchiOBHm_Chr6g0263861 PE=4 SV=1	14.9542	11.7106	1.79751	0	0	0
FvH4_2g08510	371.264	-2.65156	0.603624	-4.39273	1.11936e-05	0.000113012	-	-	-	-	-	BURP domain protein USPL1 OS=Prunus yedoensis var. nudiflora OX=2094558 GN=Pyn_28652 PE=4 SV=1	643.029	983.688	988.63	67.7283	262.724	86.074
FvH4_2g08520	273.389	-1.80459	0.54832	-3.29113	0.000997867	0.00570815	-	-	-	-	-	Putative organ specific protein OS=Rosa chinensis OX=74649 GN=RchiOBHm_Chr6g0263881 PE=4 SV=1	480.669	482.085	573.405	112.881	224.587	102.469
FvH4_2g08560	2591.83	-3.58505	0.880868	-4.0699	4.70324e-05	0.000399119	-	-	-	-	-	Putative organ specific protein OS=Rosa chinensis OX=74649 GN=RchiOBHm_Chr6g0263961 PE=4 SV=1	4275.82	4037.22	5137.28	181.55	680.117	259.247
FvH4_2g08640	64.0922	-4.7891	1.69561	-2.82441	0.00473682	0.0209212	-	-	PERK4_ARATH	Proline-rich receptor-like protein kinase PERK4 OS=Arabidopsis thaliana OX=3702 GN=PERK4 PE=1 SV=1	AT2G18470.3	Uncharacterized protein OS=Rosa chinensis OX=74649 GN=RchiOBHm_Chr6g0264041 PE=3 SV=1	0	11.7106	3.59502	0	0	0
FvH4_2g08670	474.071	-1.24907	0.28971	-4.31144	1.62192e-05	0.000156144	gi|470130184|ref|XP_004300985.1|	PREDICTED: laccase-11-like [Fragaria vesca subsp. vesca]	LAC11_ARATH	Laccase-11 OS=Arabidopsis thaliana OX=3702 GN=LAC11 PE=2 SV=1	AT5G03260.1	Laccase OS=Rosa chinensis OX=74649 GN=RchiOBHm_Chr6g0264061 PE=3 SV=1	593.893	439.146	354.109	233.286	163.143	186.494
FvH4_2g08690	1250.8	1.02539	0.288825	3.55022	0.000384913	0.00254503	gi|470126231|ref|XP_004299094.1|	PREDICTED: glucan endo-1,3-beta-D-glucosidase [Fragaria vesca subsp. vesca]	E137_ARATH	Glucan endo-1,3-beta-glucosidase 7 OS=Arabidopsis thaliana OX=3702 GN=At4g34480 PE=1 SV=2	AT4G34480.1	Putative glucan endo-1,3-beta-D-glucosidase OS=Rosa chinensis OX=74649 GN=RchiOBHm_Chr6g0264131 PE=3 SV=1	839.569	780.704	672.268	1817.38	1110.22	1737.87
FvH4_2g08760	1716.19	-1.00316	0.321253	-3.12264	0.00179236	0.00938949	-	-	Y1015_ARATH	Uncharacterized protein At1g01500 OS=Arabidopsis thaliana OX=3702 GN=At1g01500 PE=2 SV=1	AT1G19400.3	Uncharacterized protein OS=Rosa chinensis OX=74649 GN=RchiOBHm_Chr6g0264221 PE=4 SV=1	2186.51	1972.25	1975.46	1113.75	829.488	1116.91
FvH4_2g08880	11902.3	1.13937	0.435769	2.61462	0.00893259	0.0350668	-	-	RBG7_ARATH	Glycine-rich RNA-binding protein 7 OS=Arabidopsis thaliana OX=3702 GN=RBG7 PE=1 SV=1	AT4G39260.3	Putative nucleotide-binding alpha-beta plait domain-containing protein OS=Rosa chinensis OX=74649 GN=RchiOBHm_Chr6g0264491 PE=4 SV=1	10352.5	9634.87	8460.87	13259.7	38474.3	10933.4
FvH4_2g08910	241.105	-4.84302	0.64485	-7.51031	5.89877e-14	2.33685e-12	-	-	-	-	-	Putative transcription factor MYB-HB-like family OS=Rosa chinensis OX=74649 GN=RchiOBHm_Chr3g0455471 PE=4 SV=1	608.848	497.699	506.897	41.3895	2.11874	12.2963
FvH4_2g09090	5.91343	-6.24105	2.30817	-2.7039	0.00685311	0.0282386	gi|764547318|ref|XP_011459645.1|	PREDICTED: uncharacterized protein LOC101298862 [Fragaria vesca subsp. vesca]	-	-	AT5G18460.1	Uncharacterized protein OS=Morus notabilis OX=981085 GN=L484_018563 PE=4 SV=1	10.6815	9.75881	21.5701	0	0	0
FvH4_2g09120	3849.44	-2.25991	0.359416	-6.28772	3.22172e-10	7.32331e-09	gi|764523644|ref|XP_004289664.2|	PREDICTED: isoflavone reductase homolog [Fragaria vesca subsp. vesca]	PCBER_POPTR	Isoflavone reductase homolog PCBER OS=Populus trichocarpa OX=3694 GN=PCBER PE=1 SV=1	AT4G39230.1	Putative oxidoreductase OS=Rosa chinensis OX=74649 GN=RchiOBHm_Chr6g0265011 PE=4 SV=1	7105.36	6138.29	3697.47	839.079	1603.89	1094.37
FvH4_2g09250	3744.81	2.17018	0.293808	7.38641	1.50847e-13	5.65087e-12	gi|470106616|ref|XP_004289659.1|	PREDICTED: LOW QUALITY PROTEIN: glucose-1-phosphate adenylyltransferase large subunit 1-like [Fragaria vesca subsp. vesca]	GLGL1_SOLTU	Glucose-1-phosphate adenylyltransferase large subunit 1 (Fragment) OS=Solanum tuberosum OX=4113 GN=AGPS1 PE=1 SV=1	AT4G39210.2	Glucose-1-phosphate adenylyltransferase OS=Fragaria ananassa OX=3747 GN=gpL1 PE=2 SV=1	2845.56	2306.98	2665.7	14439.3	8959.11	11789.1
FvH4_2g09260	94.0075	2.54053	0.60632	4.19008	2.78856e-05	0.000253155	gi|764547303|ref|XP_011459643.1|	PREDICTED: uncharacterized protein LOC101297988 [Fragaria vesca subsp. vesca]	-	-	-	-	80.1115	65.384	38.6464	428.946	301.921	339.172
FvH4_2g09740	942.645	-2.97297	0.845643	-3.51564	0.000438695	0.0028539	gi|764523454|ref|XP_011457720.1|	PREDICTED: uncharacterized protein LOC101292168 [Fragaria vesca subsp. vesca]	-	-	-	Uncharacterized protein OS=Rosa chinensis OX=74649 GN=RchiOBHm_Chr6g0266031 PE=4 SV=1	2580.66	1282.31	1872.1	202.244	234.121	294.086
FvH4_2g09820	2655.32	-1.05952	0.242115	-4.37612	1.20808e-05	0.000121082	-	-	BGAL3_ARATH	Beta-galactosidase 3 OS=Arabidopsis thaliana OX=3702 GN=BGAL3 PE=2 SV=1	AT4G36360.1	Beta-galactosidase OS=Rosa chinensis OX=74649 GN=RchiOBHm_Chr6g0266171 PE=3 SV=1	2599.89	2603.65	3438.63	1234.16	1363.41	1549.33
FvH4_2g10050	1104.07	-2.04013	0.224003	-9.10761	8.42183e-20	6.91861e-18	-	-	-	-	-	Uncharacterized protein OS=Rosa chinensis OX=74649 GN=RchiOBHm_Chr6g0266981 PE=4 SV=1	1610.78	1288.16	1504.51	329.235	366.543	375.037
FvH4_2g10090	333.974	-1.12365	0.282997	-3.97053	7.17142e-05	0.000580784	gi|764530264|ref|XP_011458274.1|	PREDICTED: uncharacterized protein LOC101302040 isoform X2 [Fragaria vesca subsp. vesca]	XK1_ARATH	D-ribulose kinase OS=Arabidopsis thaliana OX=3702 GN=XK1 PE=1 SV=1	AT2G21370.1	Putative glycerol kinase OS=Rosa chinensis OX=74649 GN=RchiOBHm_Chr6g0267041 PE=4 SV=1	292.674	392.304	490.72	165.558	169.499	204.938
FvH4_2g10120	1731.18	-1.51258	0.260197	-5.81323	6.12795e-09	1.15055e-07	gi|764530292|ref|XP_004292425.2|	PREDICTED: MATE efflux family protein 4, chloroplastic-like [Fragaria vesca subsp. vesca]	DTX46_ARATH	Protein DETOXIFICATION 46, chloroplastic OS=Arabidopsis thaliana OX=3702 GN=DTX46 PE=2 SV=1	AT2G21340.1	Protein DETOXIFICATION OS=Rosa chinensis OX=74649 GN=RchiOBHm_Chr6g0267191 PE=3 SV=1	1337.33	1705.84	1889.18	453.404	599.604	676.295
FvH4_2g10220	550.184	1.15293	0.231219	4.98632	6.15406e-07	8.00734e-06	-	-	-	-	-	GATA transcription factor OS=Rosa chinensis OX=74649 GN=RchiOBHm_Chr6g0267451 PE=3 SV=1	521.259	494.771	352.312	1125.04	1114.46	801.308
FvH4_2g10390	55723	-1.10337	0.234342	-4.70837	2.49712e-06	2.88573e-05	gi|470107959|ref|XP_004290303.1|	PREDICTED: fructose-bisphosphate aldolase 1, chloroplastic [Fragaria vesca subsp. vesca]	ALFP2_ARATH	Fructose-bisphosphate aldolase 2, chloroplastic OS=Arabidopsis thaliana OX=3702 GN=FBA2 PE=1 SV=2	AT4G38970.1	Fructose-bisphosphate aldolase OS=Rosa chinensis OX=74649 GN=RchiOBHm_Chr6g0267861 PE=3 SV=1	65254.6	62060.1	81101.8	35010.8	28713.2	33278.9
FvH4_2g10420	2029.57	1.06088	0.241573	4.39154	1.12551e-05	0.000113535	gi|764530509|ref|XP_011458294.1|	PREDICTED: kinesin-like protein NACK1 [Fragaria vesca subsp. vesca]	KN7E_ARATH	Kinesin-like protein KIN-7E OS=Arabidopsis thaliana OX=3702 GN=KIN7E PE=2 SV=1	AT2G21300.5	Kinesin-like protein OS=Rosa chinensis OX=74649 GN=RchiOBHm_Chr6g0267891 PE=3 SV=1	1134.38	1360.38	1488.34	2682.79	2701.4	2926.51
FvH4_2g10440	119.334	-1.56755	0.579705	-2.70405	0.00685005	0.028231	gi|764530521|ref|XP_011458295.1|	PREDICTED: uncharacterized protein LOC105349681 [Fragaria vesca subsp. vesca]	-	-	-	Uncharacterized protein OS=Rosa chinensis OX=74649 GN=RchiOBHm_Chr6g0267941 PE=4 SV=1	36.3172	131.744	131.218	26.3388	31.7811	43.037
FvH4_2g10470	270.191	1.61294	0.580391	2.77905	0.00545179	0.0234379	gi|764530534|ref|XP_011458297.1|	PREDICTED: 30S ribosomal protein S31, mitochondrial [Fragaria vesca subsp. vesca]	RT31_ORYSJ	30S ribosomal protein S31, mitochondrial OS=Oryza sativa subsp. japonica OX=39947 GN=Os09g0528100 PE=3 SV=2	AT2G21290.1	30S ribosomal protein S31 OS=Theobroma cacao OX=3641 GN=TCM_006777 PE=4 SV=1	147.405	126.864	181.548	283.142	869.744	241.827
FvH4_2g10480	1758.94	-1.90151	0.28564	-6.65702	2.79438e-11	7.57233e-10	gi|470112433|ref|XP_004292439.1|	PREDICTED: epimerase family protein SDR39U1 homolog, chloroplastic isoform X1 [Fragaria vesca subsp. vesca]	GC1_ARATH	Epimerase family protein SDR39U1 homolog, chloroplastic OS=Arabidopsis thaliana OX=3702 GN=GC1 PE=2 SV=2	AT2G21280.2	Putative flavanone 4-reductase OS=Rosa chinensis OX=74649 GN=RchiOBHm_Chr6g0267981 PE=4 SV=1	2484.53	2150.84	2855.34	584.157	876.1	545.135
FvH4_2g10570	12375.7	1.50669	0.216631	6.9551	3.52301e-12	1.08532e-10	gi|470107951|ref|XP_004290299.1|	PREDICTED: arginine decarboxylase-like [Fragaria vesca subsp. vesca]	SPE1_PEA	Arginine decarboxylase OS=Pisum sativum OX=3888 PE=2 SV=1	AT4G34710.2	Arginine decarboxylase OS=Rosa chinensis OX=74649 GN=RchiOBHm_Chr6g0268211 PE=3 SV=1	6375.81	6835.07	5950.65	23667.3	16138.5	14641.8
FvH4_2g10670	1371.4	1.75538	0.179051	9.8038	1.08428e-22	1.22049e-20	gi|470107985|ref|XP_004290316.1|	PREDICTED: transcription factor RF2a [Fragaria vesca subsp. vesca]	-	-	-	Putative transcription factor bZIP family OS=Rosa chinensis OX=74649 GN=RchiOBHm_Chr6g0268361 PE=4 SV=1	773.343	932.942	751.358	2744.88	2580.63	2971.6
FvH4_2g10740	1420.38	-1.73774	0.186902	-9.2976	1.43654e-20	1.25498e-18	gi|470108046|ref|XP_004290346.1|	PREDICTED: probable ribosome-binding factor A, chloroplastic [Fragaria vesca subsp. vesca]	-	-	-	Putative ribosome-binding factor A, K domain-like, alpha/beta OS=Rosa chinensis OX=74649 GN=RchiOBHm_Chr6g0268531 PE=3 SV=1	2063.67	1791.72	2187.57	502.318	716.135	594.32
FvH4_2g10810	304.109	1.63127	0.394562	4.13438	3.55919e-05	0.000314221	gi|470108107|ref|XP_004290376.1|	PREDICTED: auxin-induced protein 15A-like [Fragaria vesca subsp. vesca]	-	-	-	Putative small auxin-up RNA OS=Rosa chinensis OX=74649 GN=RchiOBHm_Chr6g0268951 PE=4 SV=1	463.579	261.536	250.752	935.027	978.859	1107.69
FvH4_2g10820	163.472	2.02126	0.319475	6.3268	2.50299e-10	5.79649e-09	gi|470108103|ref|XP_004290374.1|	PREDICTED: auxin-induced protein 15A-like [Fragaria vesca subsp. vesca]	ARG7_VIGRR	Indole-3-acetic acid-induced protein ARG7 OS=Vigna radiata var. radiata OX=3916 GN=ARG7 PE=2 SV=1	AT4G34770.1	Putative small auxin-up RNA OS=Rosa chinensis OX=74649 GN=RchiOBHm_Chr5g0056821 PE=4 SV=1	155.95	163.948	116.838	489.149	590.07	692.691
FvH4_2g10920	3897.76	-1.36022	0.184009	-7.39211	1.44522e-13	5.44877e-12	gi|470107995|ref|XP_004290321.1|	PREDICTED: soluble inorganic pyrophosphatase 6, chloroplastic [Fragaria vesca subsp. vesca]	IPYR6_ARATH	Soluble inorganic pyrophosphatase 6, chloroplastic OS=Arabidopsis thaliana OX=3702 GN=PPA6 PE=1 SV=1	AT5G09650.1	Putative inorganic diphosphatase OS=Rosa chinensis OX=74649 GN=RchiOBHm_Chr6g0269081 PE=4 SV=1	5406.99	5431.75	5796.96	1902.04	2324.26	2254.32
FvH4_2g11000	3079.51	-1.6257	0.210474	-7.72398	1.12754e-14	4.86172e-13	gi|470112448|ref|XP_004292446.1|	PREDICTED: K(+) efflux antiporter 3, chloroplastic [Fragaria vesca subsp. vesca]	KEA3_ARATH	K(+) efflux antiporter 3, chloroplastic OS=Arabidopsis thaliana OX=3702 GN=KEA3 PE=1 SV=2	AT4G04850.2	Putative glutathione-regulated potassium-efflux system protein KefB OS=Rosa chinensis OX=74649 GN=RchiOBHm_Chr6g0269211 PE=4 SV=1	4105.98	4314.37	5022.24	1461.8	1366.59	1527.81
FvH4_2g11130	1322.79	1.85372	0.254037	7.29705	2.94138e-13	1.0677e-11	-	-	-	-	-	Putative PB1 domain-containing protein OS=Rosa chinensis OX=74649 GN=RchiOBHm_Chr6g0269391 PE=4 SV=1	615.257	577.721	580.595	2475.85	1683.34	2250.22
FvH4_2g11350	586.352	1.40737	0.518462	2.71452	0.00663727	0.0274847	gi|470106967|ref|XP_004289824.1|	PREDICTED: glutamate receptor 2.8-like isoform X2 [Fragaria vesca subsp. vesca]	GLR28_ARATH	Glutamate receptor 2.8 OS=Arabidopsis thaliana OX=3702 GN=GLR2.8 PE=2 SV=2	AT2G29110.2	Glutamate receptor OS=Rosa chinensis OX=74649 GN=RchiOBHm_Chr6g0269951 PE=3 SV=1	469.988	936.845	630.925	2632.94	1520.2	1252.17
FvH4_2g11590	1393	-1.50335	0.198138	-7.5874	3.26393e-14	1.32671e-12	-	-	-	-	-	Chloroplast fructose-1,6-bisphosphatase II OS=Fragaria ananassa OX=3747 PE=2 SV=1	1756.04	1591.66	2228.01	659.411	593.248	714.209
FvH4_2g11630	261.162	-1.23759	0.44782	-2.76358	0.00571704	0.0243413	gi|764531564|ref|XP_011458398.1|	PREDICTED: uncharacterized protein LOC105349701 [Fragaria vesca subsp. vesca]	-	-	-	Uncharacterized protein OS=Rosa chinensis OX=74649 GN=RchiOBHm_Chr6g0270871 PE=4 SV=1	373.854	468.423	524.872	221.998	192.806	164.975
FvH4_2g11650	2292.79	2.92304	0.675832	4.3251	1.52463e-05	0.000148117	gi|470108189|ref|XP_004290411.1|	PREDICTED: transcription factor ORG2-like [Fragaria vesca subsp. vesca]	ORG2_ARATH	Transcription factor ORG2 OS=Arabidopsis thaliana OX=3702 GN=ORG2 PE=1 SV=1	AT3G56970.1	Putative transcription factor bHLH family OS=Rosa chinensis OX=74649 GN=RchiOBHm_Chr6g0270891 PE=4 SV=1	894.045	1346.72	2080.62	13837.3	9607.44	9331.85
FvH4_2g12120	323.492	1.71914	0.37433	4.59257	4.37819e-06	4.81704e-05	gi|764532048|ref|XP_004290428.2|	PREDICTED: LRR receptor-like serine/threonine-protein kinase GSO2 [Fragaria vesca subsp. vesca]	PXC3_ARATH	Leucine-rich repeat receptor-like tyrosine-protein kinase PXC3 OS=Arabidopsis thaliana OX=3702 GN=PXC3 PE=2 SV=1	AT1G34420.1	Putative receptor protein-tyrosine kinase RLK-Pelle-LRR-XI-1 family OS=Rosa chinensis OX=74649 GN=RchiOBHm_Chr6g0272091 PE=4 SV=1	194.404	218.597	137.509	677.283	307.218	826.925
FvH4_2g12161	2314.45	-1.07302	0.261645	-4.10105	4.11278e-05	0.000354408	gi|470108240|ref|XP_004290431.1|	PREDICTED: uncharacterized protein LOC101292757 isoform X1 [Fragaria vesca subsp. vesca]	YTQB_BACSU	Putative rRNA methylase YtqB OS=Bacillus subtilis (strain 168) OX=224308 GN=ytqB PE=3 SV=1	AT1G16445.1	Putative rRNA methylase, S-adenosyl-L-methionine-dependent methyltransferase OS=Rosa chinensis OX=74649 GN=RchiOBHm_Chr6g0272151 PE=4 SV=1	2791.09	2492.4	2868.82	1348.92	1064.67	1461.21
FvH4_2g12190	698.026	1.20674	0.239306	5.04266	4.59114e-07	6.12841e-06	gi|470112536|ref|XP_004292489.1|	PREDICTED: probable inactive receptor kinase At1g48480 [Fragaria vesca subsp. vesca]	Y1848_ARATH	Probable inactive receptor kinase At1g48480 OS=Arabidopsis thaliana OX=3702 GN=RKL1 PE=1 SV=1	AT1G48480.1	Uncharacterized protein OS=Rosa chinensis OX=74649 GN=RchiOBHm_Chr3g0491091 PE=4 SV=1	375.99	404.015	465.555	1106.23	737.323	1031.86
FvH4_2g12340	172.727	-1.18735	0.459616	-2.58336	0.0097844	0.0378023	-	-	-	-	-	Uncharacterized protein OS=Rosa chinensis OX=74649 GN=RchiOBHm_Chr6g0272351 PE=4 SV=1	218.972	140.527	208.511	109.118	85.8091	54.3086
FvH4_2g12460	74.3297	-1.20406	0.421769	-2.85479	0.00430651	0.0193277	-	-	-	-	-	Uncharacterized protein OS=Rosa chinensis OX=74649 GN=RchiOBHm_Chr6g0272891 PE=4 SV=1	117.497	132.72	133.016	65.847	63.5623	36.8888
FvH4_2g12490	11630.3	-2.24251	0.239563	-9.36082	7.91207e-21	7.15233e-19	-	-	ATPD_TOBAC	ATP synthase delta chain, chloroplastic OS=Nicotiana tabacum OX=4097 GN=ATPD PE=2 SV=1	AT4G09650.1	Putative H(+)-transporting two-sector ATPase OS=Rosa chinensis OX=74649 GN=RchiOBHm_Chr6g0272941 PE=3 SV=1	17447.2	13838	19698.9	3632.87	2904.8	4236.07
FvH4_2g12610	853.167	2.7367	0.524525	5.21749	1.81368e-07	2.60994e-06	-	-	LAC14_ARATH	Laccase-14 OS=Arabidopsis thaliana OX=3702 GN=LAC14 PE=2 SV=1	AT5G09360.1	Laccase OS=Rosa chinensis OX=74649 GN=RchiOBHm_Chr6g0273201 PE=3 SV=1	190.131	216.645	312.766	1228.52	1818.94	1750.17
FvH4_2g12620	4286.15	-1.40097	0.33517	-4.17989	2.91648e-05	0.000263033	-	-	LAC9_ORYSJ	Putative laccase-9 OS=Oryza sativa subsp. japonica OX=39947 GN=LAC9 PE=3 SV=1	AT5G09360.1	Laccase OS=Rosa chinensis OX=74649 GN=RchiOBHm_Chr6g0273241 PE=3 SV=1	1540.28	1661.92	1768.75	470.336	572.061	840.246
FvH4_2g12650	2712.14	-1.05021	0.234314	-4.48206	7.39254e-06	7.76847e-05	-	-	Y4967_ARATH	Uncharacterized oxidoreductase At4g09670 OS=Arabidopsis thaliana OX=3702 GN=At4g09670 PE=1 SV=1	AT4G09670.1	Putative D-xylose 1-dehydrogenase (NADP(+)) OS=Rosa chinensis OX=74649 GN=RchiOBHm_Chr6g0273321 PE=4 SV=1	3285.64	3064.26	3240.91	1587.85	1059.37	1983.8
FvH4_2g12660	2218.18	-1.42309	0.223661	-6.36268	1.98264e-10	4.67468e-09	-	-	Y1181_ARATH	Uncharacterized aarF domain-containing protein kinase At1g71810, chloroplastic OS=Arabidopsis thaliana OX=3702 GN=At1g71810 PE=1 SV=1	AT1G71810.1	Putative cadmium-transporting ATPase OS=Rosa chinensis OX=74649 GN=RchiOBHm_Chr6g0273371 PE=4 SV=1	3098.71	2902.27	3395.49	1143.86	1044.54	1315.7
FvH4_2g12820	1229.13	-1.0099	0.27767	-3.63706	0.000275773	0.00189234	-	-	-	-	-	Laccase OS=Rosa chinensis OX=74649 GN=RchiOBHm_Chr6g0273711 PE=3 SV=1	1439.87	1683.39	1415.54	761.944	750.035	741.876
FvH4_2g12830	8367.77	-1.83933	0.238854	-7.70063	1.35399e-14	5.77432e-13	-	-	-	-	-	Laccase OS=Rosa chinensis OX=74649 GN=RchiOBHm_Chr6g0273761 PE=3 SV=1	3828.26	4405.12	4928.77	1202.18	1205.56	1270.62
FvH4_2g12900	788.575	-1.24527	0.209046	-5.95689	2.5708e-09	5.16653e-08	gi|470108331|ref|XP_004290474.1|	PREDICTED: uncharacterized protein LOC101306395 [Fragaria vesca subsp. vesca]	RS1_SYNP6	30S ribosomal protein S1 OS=Synechococcus sp. (strain ATCC 27144 / PCC 6301 / SAUG 1402/1) OX=269084 GN=rpsA PE=1 SV=4	AT1G71720.1	Putative ribosomal protein S1 OS=Rosa chinensis OX=74649 GN=RchiOBHm_Chr6g0274001 PE=4 SV=1	1134.38	940.749	1019.19	387.557	362.305	555.382
FvH4_2g12940	112.365	-2.87488	0.566321	-5.07641	3.84629e-07	5.22653e-06	gi|1358150103|gb|PRQ24582.1|	putative very-long-chain 3-oxoacyl-CoA synthase [Rosa chinensis]	KCS1_ARATH	3-ketoacyl-CoA synthase 1 OS=Arabidopsis thaliana OX=3702 GN=KCS1 PE=1 SV=1	AT1G01120.1	3-ketoacyl-CoA synthase OS=Rosa chinensis OX=74649 GN=RchiOBHm_Chr6g0274011 PE=3 SV=1	303.356	183.466	273.221	15.0507	16.9499	71.7283
FvH4_2g13070	3240.45	-2.08663	0.272577	-7.65519	1.93033e-14	8.08494e-13	gi|470108358|ref|XP_004290487.1|	PREDICTED: espin isoform X1 [Fragaria vesca subsp. vesca]	OHP2_ARATH	Light-harvesting complex-like protein OHP2, chloroplastic OS=Arabidopsis thaliana OX=3702 GN=OHP2 PE=2 SV=1	AT1G34000.1	Putative chlorophyll a/b binding protein OS=Rosa chinensis OX=74649 GN=RchiOBHm_Chr6g0274331 PE=4 SV=1	5486.04	4262.65	5624.4	1158.91	1066.79	1393.58
FvH4_2g13100	1886.11	1.09779	0.295576	3.71407	0.000203954	0.00145585	gi|470108360|ref|XP_004290488.1|	PREDICTED: uncharacterized protein LOC101310479 [Fragaria vesca subsp. vesca]	-	-	-	Uncharacterized protein OS=Rosa chinensis OX=74649 GN=RchiOBHm_Chr6g0274371 PE=4 SV=1	2371.3	1434.54	1885.59	3418.4	4101.89	4660.29
FvH4_2g13110	5401.19	2.75413	0.365893	7.52715	5.18583e-14	2.06489e-12	gi|470108362|ref|XP_004290489.1|	PREDICTED: peroxidase 12 [Fragaria vesca subsp. vesca]	-	-	-	Peroxidase OS=Rosa chinensis OX=74649 GN=RchiOBHm_Chr6g0274401 PE=3 SV=1	2685.34	2919.83	2164.2	27992.5	12367.1	12054.5
FvH4_2g13111	11.9363	6.66973	1.88823	3.53226	0.000412016	0.0027006	gi|1141985171|gb|ONK66393.1|	uncharacterized protein A4U43_C06F7380 [Asparagus officinalis]	-	-	-	Putative ribonuclease H-like domain, reverse transcriptase zinc-binding domain-containing protein OS=Rosa chinensis OX=74649 GN=RchiOBHm_Chr4g0402201 PE=4 SV=1	0	1.95176	0	56.4403	97.4622	45.0864
FvH4_2g13150	102.525	2.06459	0.556615	3.70919	0.000207926	0.00148013	gi|764532751|ref|XP_011458476.1|	PREDICTED: disease resistance protein RPM1-like isoform X1 [Fragaria vesca subsp. vesca]	-	-	-	Putative P-loop containing nucleoside triphosphate hydrolase, leucine-rich repeat domain, L OS=Rosa chinensis OX=74649 GN=RchiOBHm_Chr6g0274421 PE=3 SV=1	25.6357	66.3599	71.0016	221.998	188.568	272.568
FvH4_2g13270	349.012	-2.00703	0.31966	-6.27863	3.41561e-10	7.7415e-09	gi|470108376|ref|XP_004290496.1|	PREDICTED: 5-formyltetrahydrofolate cyclo-ligase-like protein COG0212 isoform X1 [Fragaria vesca subsp. vesca]	-	-	-	Uncharacterized protein OS=Prunus persica OX=3760 GN=PRUPE_8G036900 PE=4 SV=1	284.129	488.916	517.682	133.575	88.9872	98.3703
FvH4_2g13310	56.7116	2.10867	0.565326	3.73001	0.000191474	0.00137938	gi|470108382|ref|XP_004290499.1|	PREDICTED: probable ran guanine nucleotide release factor [Fragaria vesca subsp. vesca]	MOG1_DANRE	Ran guanine nucleotide release factor OS=Danio rerio OX=7955 GN=rangrf PE=2 SV=1	AT1G69680.1	Putative ran-interacting Mog1 protein OS=Rosa chinensis OX=74649 GN=RchiOBHm_Chr4g0440001 PE=4 SV=1	40.5898	31.2282	28.7601	99.7112	241.537	92.2221
FvH4_2g13450	314.834	4.51062	0.984823	4.58013	4.64687e-06	5.08874e-05	-	-	Y1341_ARATH	Probable LRR receptor-like serine/threonine-protein kinase At1g34110 OS=Arabidopsis thaliana OX=3702 GN=At1g34110 PE=1 SV=2	AT1G34110.1	Uncharacterized protein OS=Rosa chinensis OX=74649 GN=RchiOBHm_Chr6g0275071 PE=3 SV=1	70.4981	89.781	68.3053	1482.5	1317.86	2410.07
FvH4_2g13513	328.228	-1.42413	0.283592	-5.02175	5.12019e-07	6.75822e-06	-	-	-	-	-	Uncharacterized protein OS=Prunus yedoensis var. nudiflora OX=2094558 GN=Pyn_36835 PE=4 SV=1	615.257	536.734	537.455	200.363	146.193	282.814
FvH4_2g13680	1771.12	1.46081	0.296832	4.92134	8.59557e-07	1.08901e-05	-	-	-	-	-	Uncharacterized protein OS=Rosa chinensis OX=74649 GN=RchiOBHm_Chr6g0275361 PE=4 SV=1	845.978	863.654	809.778	2206.81	2100.73	2627.31
FvH4_2g13810	541.167	-2.37424	0.403566	-5.88316	4.02512e-09	7.78844e-08	-	-	WTR7_ARATH	WAT1-related protein At1g43650 OS=Arabidopsis thaliana OX=3702 GN=At1g43650 PE=2 SV=1	AT1G43650.1	WAT1-related protein OS=Rosa chinensis OX=74649 GN=RchiOBHm_Chr6g0275461 PE=3 SV=1	538.349	661.647	715.408	163.677	146.193	59.432
FvH4_2g13890	6502.88	-1.89495	0.28816	-6.57604	4.83139e-11	1.26457e-09	-	-	F16P2_SPIOL	Fructose-1,6-bisphosphatase, cytosolic OS=Spinacia oleracea OX=3562 PE=1 SV=2	AT1G43670.1	Cytosolic fructose-1,6-bisphosphatase OS=Fragaria ananassa OX=3747 PE=2 SV=1	10198.7	7479.15	11640.7	2323.46	3008.62	2551.48
FvH4_2g13900	5846.76	1.19091	0.321283	3.70673	0.000209949	0.00149317	-	-	RS174_ARATH	40S ribosomal protein S17-4 OS=Arabidopsis thaliana OX=3702 GN=RPS17D PE=2 SV=3	AT5G04800.4	Putative ribosomal protein S17e OS=Rosa chinensis OX=74649 GN=RchiOBHm_Chr3g0475121 PE=3 SV=1	4385.84	4030.39	3823.3	8203.59	11709.2	8029.47
FvH4_2g13960	839.54	-3.922	0.806145	-4.86513	1.14379e-06	1.4102e-05	-	-	-	-	-	Putative Ccc1 family protein OS=Rosa chinensis OX=74649 GN=RchiOBHm_Chr6g0275791 PE=4 SV=1	2174.76	1629.72	1398.46	43.2709	152.55	147.555
FvH4_2g13961	25.3702	-9.07278	1.62934	-5.56838	2.57112e-08	4.33389e-07	-	-	-	-	-	Uncharacterized protein OS=Vitis vinifera OX=29760 GN=VITISV_003451 PE=4 SV=1	152.746	57.577	88.9767	0	0	0
FvH4_2g14031	83.3394	2.12223	0.683909	3.1031	0.00191507	0.00993082	-	-	-	-	-	Putative TIR domain, winged helix-turn-helix DNA-binding domain-containing protein OS=Rosa chinensis OX=74649 GN=RchiOBHm_Chr6g0276021 PE=4 SV=1	66.2255	68.3116	44.9377	294.43	181.153	305.358
FvH4_2g14040	268.717	1.62298	0.446117	3.638	0.000274761	0.00188761	-	-	-	-	-	Putative P-loop containing nucleoside triphosphate hydrolase, leucine-rich repeat domain, L OS=Rosa chinensis OX=74649 GN=RchiOBHm_Chr6g0276051 PE=3 SV=1	310.833	247.874	144.699	768.528	405.739	990.875
FvH4_2g14080	1687.92	-2.20736	0.24573	-8.98286	2.63814e-19	2.0637e-17	gi|470108457|ref|XP_004290534.1|	PREDICTED: uncharacterized protein LOC101300584 [Fragaria vesca subsp. vesca]	-	-	AT5G22340.2	Uncharacterized protein OS=Rosa chinensis OX=74649 GN=RchiOBHm_Chr5g0045261 PE=4 SV=1	2354.21	1809.28	2820.29	460.929	506.38	545.135
FvH4_2g14190	1356.9	-4.07685	0.69798	-5.84093	5.19092e-09	9.86485e-08	gi|470108471|ref|XP_004290540.1|	PREDICTED: carbonic anhydrase 2-like [Fragaria vesca subsp. vesca]	BCA2_ARATH	Beta carbonic anhydrase 2, chloroplastic OS=Arabidopsis thaliana OX=3702 GN=BCA2 PE=1 SV=3	AT5G14740.9	Carbonic anhydrase OS=Rosa chinensis OX=74649 GN=RchiOBHm_Chr6g0276331 PE=3 SV=1	896.181	1577.02	3989.57	129.813	95.3434	157.802
FvH4_2g14220	208095	3.00711	0.418586	7.18398	6.77103e-13	2.33476e-11	gi|470108479|ref|XP_004290544.1|	PREDICTED: extensin-3-like [Fragaria vesca subsp. vesca]	-	-	-	Uncharacterized protein OS=Rosa chinensis OX=74649 GN=RchiOBHm_Chr6g0249201 PE=4 SV=1	74699.2	121123	78846.8	910432	327995	969790
FvH4_2g14260	610.984	2.03288	0.235071	8.64795	5.24311e-18	3.36321e-16	gi|470112632|ref|XP_004292536.1|	PREDICTED: U-box domain-containing protein 28-like [Fragaria vesca subsp. vesca]	PUB29_ARATH	U-box domain-containing protein 29 OS=Arabidopsis thaliana OX=3702 GN=PUB29 PE=1 SV=1	AT3G18710.1	RING-type E3 ubiquitin transferase OS=Rosa chinensis OX=74649 GN=RchiOBHm_Chr6g0276541 PE=4 SV=1	284.129	424.508	396.351	1586.91	1557.28	1380.26
FvH4_2g14270	55.7235	5.0142	0.808948	6.19842	5.70338e-10	1.24681e-08	gi|1358150331|gb|PRQ24810.1|	hypothetical protein RchiOBHm_Chr6g0276561 [Rosa chinensis]	idL4_ARATH	Protein idA-LIKE 4 OS=Arabidopsis thaliana OX=3702 GN=idL4 PE=2 SV=1	AT3G18715.1	Uncharacterized protein OS=Rosa chinensis OX=74649 GN=RchiOBHm_Chr6g0276561 PE=4 SV=1	13.886	0	12.5826	270.913	290.268	293.061
FvH4_2g14370	692.264	-2.26624	0.48281	-4.69385	2.68107e-06	3.08008e-05	gi|470112639|ref|XP_004292539.1|	PREDICTED: protein TRANSPARENT TESTA 12-like [Fragaria vesca subsp. vesca]	-	-	-	Protein DETOXIFICATION OS=Rosa chinensis OX=74649 GN=RchiOBHm_Chr6g0295151 PE=3 SV=1	865.205	934.894	997.617	206.948	173.737	200.839
FvH4_2g14400	56.9739	-2.08192	0.754178	-2.76052	0.00577102	0.0245221	gi|470112643|ref|XP_004292541.1|	PREDICTED: uncharacterized protein LOC101294335 [Fragaria vesca subsp. vesca]	-	-	-	Putative NTF2-like domain-containing protein OS=Rosa chinensis OX=74649 GN=RchiOBHm_Chr6g0276731 PE=4 SV=1	98.2701	117.106	125.826	13.1694	28.603	38.9382
FvH4_2g14420	462.307	-1.68642	0.250782	-6.72465	1.76017e-11	4.89433e-10	gi|764533442|ref|XP_004290551.2|	PREDICTED: uncharacterized protein LOC101305999 isoform X2 [Fragaria vesca subsp. vesca]	-	-	-	Putative peroxiredoxin OS=Rosa chinensis OX=74649 GN=RchiOBHm_Chr6g0276751 PE=4 SV=1	675.073	620.66	662.382	187.194	226.706	194.691
FvH4_2g14570	1115.38	1.41328	0.350368	4.03368	5.49095e-05	0.000456695	gi|470108508|ref|XP_004290558.1|	PREDICTED: pathogen-related protein-like [Fragaria vesca subsp. vesca]	PRPX_HORVU	Pathogen-related protein OS=Hordeum vulgare OX=4513 PE=2 SV=2	AT1G78780.5	Putative NTF2-like domain-containing protein OS=Rosa chinensis OX=74649 GN=RchiOBHm_Chr6g0276971 PE=4 SV=1	882.295	1368.18	598.57	2754.29	2966.24	1866.99
FvH4_2g14750	8603.62	1.40204	0.215495	6.50613	7.71101e-11	1.94755e-09	-	-	ADH1_TRIRP	Alcohol dehydrogenase 1 OS=Trifolium repens OX=3899 GN=ADH1 PE=2 SV=1	AT1G77120.1	Alcohol dehydrogenase OS=Rosa rugosa OX=74645 PE=2 SV=1	5317.27	4412.93	4590.84	15986.7	11259	10599.4
FvH4_2g14791	1496.42	-1.44088	0.331799	-4.34264	1.40778e-05	0.00013843	-	-	-	-	-	Putative photosystem II OS=Rosa chinensis OX=74649 GN=RchiOBHm_Chr6g0277361 PE=4 SV=1	2038.04	1731.21	2653.12	810.859	858.091	696.789
FvH4_2g14850	55.2747	10.4804	1.43097	7.32403	2.40633e-13	8.85838e-12	-	-	-	-	-	Putative SWEET sugar transporter OS=Rosa chinensis OX=74649 GN=RchiOBHm_Chr6g0277421 PE=3 SV=1	0	0	0	203.185	269.08	299.21
FvH4_2g14860	2200.65	1.55735	0.15572	10.001	1.50932e-23	1.8405e-21	-	-	-	-	-	Bidirectional sugar transporter SWEET OS=Rosa chinensis OX=74649 GN=RchiOBHm_Chr6g0277441 PE=3 SV=1	1155.74	1457.97	1391.27	4283.82	3837.04	3668.39
FvH4_2g14900	19939	-2.33877	0.357215	-6.54722	5.86192e-11	1.49668e-09	-	-	-	-	-	Uncharacterized protein OS=Prunus persica OX=3760 GN=PRUPE_8G016900 PE=4 SV=1	31574.6	21361	33814.7	5426.73	5465.3	6256.76
FvH4_2g14960	1956.1	-1.20988	0.267201	-4.52798	5.95489e-06	6.35758e-05	-	-	-	-	-	Putative minus-end-directed kinesin ATPase OS=Rosa chinensis OX=74649 GN=RchiOBHm_Chr3g0456641 PE=4 SV=1	2377.71	2274.78	2411.36	1014.98	797.707	1240.9
FvH4_2g15050	226.314	-2.09297	0.652704	-3.20662	0.00134306	0.00738149	gi|470108545|ref|XP_004290576.1|	PREDICTED: basic blue protein [Fragaria vesca subsp. vesca]	BABL_ARATH	Basic blue protein OS=Arabidopsis thaliana OX=3702 GN=ARPN PE=2 SV=2	AT2G02850.1	Basic blue protein OS=Quercus suber OX=58331 GN=CFP56_15457 PE=4 SV=1	239.266	224.453	363.097	5.64403	125.006	63.5308
FvH4_2g15200	2735.78	-1.05295	0.210991	-4.9905	6.0224e-07	7.85528e-06	-	-	ACR3_ARATH	ACT domain-containing protein ACR3 OS=Arabidopsis thaliana OX=3702 GN=ACR3 PE=2 SV=1	AT1G76990.5	Putative [Protein-PII] uridylyltransferase OS=Rosa chinensis OX=74649 GN=RchiOBHm_Chr6g0277951 PE=4 SV=1	4404	3887.91	3697.47	1411.01	1777.63	2590.42
FvH4_2g15330	173.034	-2.79558	0.560382	-4.98871	6.07841e-07	7.91512e-06	-	-	-	-	-	Aromatic L-amino acid decarboxylase OS=Rosa hybrid cultivar OX=128735 GN=AADC PE=2 SV=1	151.678	121.985	109.648	11.2881	33.8999	10.2469
FvH4_2g15340	37.9786	-2.02393	0.798289	-2.53533	0.0112341	0.0423276	-	-	-	-	-	RuvB-like helicase OS=Rosa chinensis OX=74649 GN=RchiOBHm_Chr6g0278081 PE=3 SV=1	29.9083	69.2875	61.1153	33.8642	4.23749	1.02469
FvH4_2g15420	495.718	-5.38487	1.25791	-4.2808	1.86225e-05	0.00017645	-	-	-	-	-	Uncharacterized protein OS=Rosa chinensis OX=74649 GN=RchiOBHm_Chr6g0278281 PE=4 SV=1	6.40892	3.90352	12.5826	0	0	0
FvH4_2g15440	18594.7	-1.01305	0.205566	-4.92811	8.30289e-07	1.05478e-05	gi|470108874|ref|XP_004290727.1|	PREDICTED: aquaporin PIP2-7 [Fragaria vesca subsp. vesca]	PIP27_ARATH	Aquaporin PIP2-7 OS=Arabidopsis thaliana OX=3702 GN=PIP2-7 PE=1 SV=2	AT4G35100.2	Plasma membrane aquaporin OS=Rosa hybrid cultivar OX=128735 GN=PIP2;1 PE=2 SV=1	18626.5	16240.6	15632.9	7190.49	7839.35	9992.78
FvH4_2g15670	156.637	-2.81732	0.488611	-5.76597	8.11874e-09	1.49437e-07	gi|470108914|ref|XP_004290747.1|	PREDICTED: serine/threonine protein phosphatase 2A 57 kDa regulatory subunit B' beta isoform-like [Fragaria vesca subsp. vesca]	-	-	-	Serine/threonine protein phosphatase 2A regulatory subunit OS=Rosa chinensis OX=74649 GN=RchiOBHm_Chr6g0278971 PE=3 SV=1	260.63	230.308	292.994	47.0336	12.7125	51.2345
FvH4_2g15780	380.192	1.19735	0.255075	4.69409	2.67791e-06	3.07796e-05	gi|470112847|ref|XP_004292641.1|	PREDICTED: mechanosensitive ion channel protein 6-like [Fragaria vesca subsp. vesca]	MSL6_ARATH	Mechanosensitive ion channel protein 6 OS=Arabidopsis thaliana OX=3702 GN=MSL6 PE=1 SV=1	AT1G78610.1	Mechanosensitive ion channel protein OS=Rosa chinensis OX=74649 GN=RchiOBHm_Chr6g0279131 PE=3 SV=1	390.944	448.905	409.832	904.926	934.366	1026.74
FvH4_2g16010	1384.91	-1.86323	0.293189	-6.35506	2.08347e-10	4.89271e-09	-	-	SR43C_ARATH	Signal recognition particle 43 kDa protein, chloroplastic OS=Arabidopsis thaliana OX=3702 GN=CAO PE=1 SV=2	AT2G47450.1	Putative signal-recognition-particle GTPase OS=Rosa chinensis OX=74649 GN=RchiOBHm_Chr6g0279541 PE=4 SV=1	1905.59	1553.6	1725.61	423.302	493.667	508.246
FvH4_2g16020	482.696	-1.44937	0.511111	-2.83573	0.00457217	0.0202897	-	-	-	-	-	Putative Late embryogenesis abundant protein, LEA-14 OS=Rosa chinensis OX=74649 GN=RchiOBHm_Chr6g0279601 PE=4 SV=1	38.4535	64.4081	80.8879	13.1694	38.1374	16.395
FvH4_2g16052	138.992	2.48667	0.696055	3.57252	0.000353559	0.00235703	-	-	-	-	-	Putative amino acid transporter, transmembrane domain-containing protein OS=Rosa chinensis OX=74649 GN=RchiOBHm_Chr6g0279681 PE=4 SV=1	89.7249	105.395	133.016	611.436	646.217	582.024
FvH4_2g16070	2787.21	-1.26151	0.272066	-4.63679	3.53857e-06	3.96594e-05	-	-	-	-	-	Probable alanine--tRNA ligase, chloroplastic OS=Rosa chinensis OX=74649 GN=RchiOBHm_Chr6g0279751 PE=3 SV=1	3797.29	3716.15	4581.85	1953.77	1298.79	1792.18
FvH4_2g16110	710.355	1.11797	0.402699	2.77619	0.00549995	0.0236103	-	-	-	-	-	Putative expansin/Lol pI OS=Rosa chinensis OX=74649 GN=RchiOBHm_Chr6g0279781 PE=3 SV=1	431.534	528.927	640.812	963.247	1453.46	1059.53
FvH4_2g16180	827.57	3.05101	0.432041	7.06187	1.64279e-12	5.30518e-11	gi|470107415|ref|XP_004290041.1|	PREDICTED: NAC transcription factor 29 [Fragaria vesca subsp. vesca]	NAC22_ORYSJ	NAC domain-containing protein 22 OS=Oryza sativa subsp. japonica OX=39947 GN=NAC022 PE=2 SV=1	AT2G17040.1	Putative transcription factor NAM family OS=Rosa chinensis OX=74649 GN=RchiOBHm_Chr6g0279801 PE=4 SV=1	288.402	388.4	271.424	3316.81	2260.7	2280.96
FvH4_2g16190	338.868	5.9319	1.12373	5.27875	1.30065e-07	1.92491e-06	gi|470107417|ref|XP_004290042.1|	PREDICTED: endochitinase 2-like [Fragaria vesca subsp. vesca]	CHI5_PHAVU	Endochitinase CH5B OS=Phaseolus vulgaris OX=3885 PE=3 SV=1	AT3G12500.1	Putative chitinase OS=Rosa chinensis OX=74649 GN=RchiOBHm_Chr6g0279841 PE=4 SV=1	10.6815	23.4211	44.9377	1651.82	1442.86	1737.87
FvH4_2g16204	52.1876	1.68567	0.526229	3.2033	0.00135861	0.00745645	-	-	-	-	AT2G17070.1	Uncharacterized protein OS=Rosa chinensis OX=74649 GN=RchiOBHm_Chr6g0279891 PE=4 SV=1	41.658	42.9387	56.6215	201.304	96.4028	156.778
FvH4_2g16360	2720.17	-2.28074	0.257762	-8.84825	8.88998e-19	6.40434e-17	-	-	YCF39_CYAPA	Uncharacterized protein ycf39 OS=Cyanophora paradoxa OX=2762 GN=ycf39 PE=3 SV=1	AT4G35250.1	Putative 3,8-divinyl protochlorophyllide a 8-vinyl-reductase (NADPH) OS=Rosa chinensis OX=74649 GN=RchiOBHm_Chr6g0280111 PE=4 SV=1	3930.81	3442.91	4722.05	835.316	752.154	901.727
FvH4_2g16370	311.937	-1.3804	0.354145	-3.89784	9.70558e-05	0.000758467	-	-	OFT16_ARATH	O-fucosyltransferase 16 OS=Arabidopsis thaliana OX=3702 GN=OFUT16 PE=2 SV=1	AT1G76270.1	Putative GDP-fucose protein O-fucosyltransferase OS=Rosa chinensis OX=74649 GN=RchiOBHm_Chr6g0280121 PE=4 SV=1	164.496	236.163	242.664	105.355	67.7998	73.7777
FvH4_2g16740	1473.2	1.17169	0.369082	3.1746	0.00150041	0.0081036	gi|764547832|ref|XP_011459716.1|	PREDICTED: protein EXORDIUM-like 5 [Fragaria vesca subsp. vesca]	EXOL5_ARATH	Protein EXORDIUM-like 5 OS=Arabidopsis thaliana OX=3702 GN=EXL5 PE=2 SV=1	AT2G17230.1	Putative phosphate-induced protein OS=Rosa chinensis OX=74649 GN=RchiOBHm_Chr6g0280861 PE=4 SV=1	939.975	1034.43	929.312	2678.09	1561.51	2301.45
FvH4_2g16800	32.5307	-5.28857	1.31862	-4.01067	6.05461e-05	0.00049844	gi|470107476|ref|XP_004290071.1|	PREDICTED: probable anion transporter 5 [Fragaria vesca subsp. vesca]	-	-	-	Putative major facilitator superfamily OS=Rosa chinensis OX=74649 GN=RchiOBHm_Chr6g0280921 PE=4 SV=1	12.8178	40.987	107.851	0	4.23749	0
FvH4_2g16861	141.319	2.20207	0.680745	3.23479	0.00121732	0.0067921	gi|629086349|gb|KCW52706.1|	hypothetical protein EUGRSUZ_J02069 [Eucalyptus grandis]	-	-	-	Uncharacterized protein OS=Eucalyptus grandis OX=71139 GN=EUGRSUZ_J02069 PE=4 SV=1	89.7249	68.3116	75.4954	252.1	707.66	114.765
FvH4_2g16890	68.9677	3.2007	0.565721	5.65774	1.53378e-08	2.69598e-07	gi|470112173|ref|XP_004292312.1|	PREDICTED: cyclin-dependent kinase F-4-like [Fragaria vesca subsp. vesca]	-	-	-	Uncharacterized protein OS=Rosa chinensis OX=74649 GN=RchiOBHm_Chr7g0203861 PE=4 SV=1	34.1809	23.4211	21.5701	270.913	264.843	190.592
FvH4_2g16940	221.884	-1.1204	0.375602	-2.98294	0.00285497	0.0137964	gi|470112175|ref|XP_004292313.1|	PREDICTED: xylem cysteine proteinase 1 [Fragaria vesca subsp. vesca]	XCP1_ARATH	Cysteine protease XCP1 OS=Arabidopsis thaliana OX=3702 GN=XCP1 PE=1 SV=1	AT4G35350.1	Putative chymopapain protein OS=Rosa chinensis OX=74649 GN=RchiOBHm_Chr6g0281131 PE=3 SV=1	540.486	343.51	307.374	163.677	218.231	166
FvH4_2g17020	102.555	3.85884	0.625474	6.16946	6.85229e-10	1.48686e-08	-	-	-	-	AT4G38213.1	Uncharacterized protein OS=Rosa chinensis OX=74649 GN=RchiOBHm_Chr6g0281201 PE=4 SV=1	44.8625	37.0835	5.39253	366.862	667.404	227.481
FvH4_2g17030	92.4997	1.51956	0.503167	3.01999	0.0025278	0.0124649	-	-	EXP20_ARATH	Expansin-A20 OS=Arabidopsis thaliana OX=3702 GN=EXPA20 PE=2 SV=1	AT4G38210.1	Expansin OS=Rosa chinensis OX=74649 GN=RchiOBHm_Chr6g0281211 PE=3 SV=1	113.224	87.8292	48.5327	259.625	280.733	174.197
FvH4_2g17031	204.231	-1.12157	0.379287	-2.95704	0.00310604	0.0147929	-	-	-	-	-	-	210.426	183.466	250.752	91.2451	135.6	69.6789
FvH4_2g17060	2824.1	1.57608	0.378257	4.1667	3.0904e-05	0.000277012	-	-	HMDH2_GOSHI	3-hydroxy-3-methylglutaryl-coenzyme A reductase 2 OS=Gossypium hirsutum OX=3635 GN=HMG2 PE=3 SV=1	AT1G76490.1	3-hydroxy-3-methylglutaryl coenzyme A reductase OS=Rosa chinensis OX=74649 GN=RchiOBHm_Chr6g0281291 PE=3 SV=1	665.46	734.838	561.721	2049.72	1665.33	2134.43
FvH4_2g17090	649.638	2.14985	0.516506	4.16229	3.1507e-05	0.000281878	-	-	HMDH3_SOLTU	3-hydroxy-3-methylglutaryl-coenzyme A reductase 3 OS=Solanum tuberosum OX=4113 GN=HMG3 PE=2 SV=1	AT1G76490.1	3-hydroxy-3-methylglutaryl coenzyme A reductase OS=Rosa chinensis OX=74649 GN=RchiOBHm_Chr6g0281491 PE=3 SV=1	362.104	578.697	448.478	2941.48	2015.98	1208.11
FvH4_2g17170	1484.58	-1.17536	0.209729	-5.6042	2.09223e-08	3.59394e-07	-	-	-	-	-	Putative transcription regulator mTERF family OS=Rosa chinensis OX=74649 GN=RchiOBHm_Chr6g0281661 PE=4 SV=1	2195.06	1569.22	2170.49	905.866	722.491	999.073
FvH4_2g17250	1113.48	-1.03521	0.204382	-5.06506	4.08271e-07	5.50943e-06	-	-	-	-	-	Chloride channel protein OS=Rosa chinensis OX=74649 GN=RchiOBHm_Chr6g0281741 PE=3 SV=1	1606.5	1561.41	1824.47	797.689	652.573	985.752
FvH4_2g17331	16.0416	-4.08158	1.29844	-3.14345	0.00166966	0.00886637	gi|1358161683|gb|PRQ36160.1|	putative transcription factor interactor and regulator CCHC(Zn) family [Rosa chinensis]	POLR1_ARATH	Retrovirus-related Pol polyprotein from transposon RE1 OS=Arabidopsis thaliana OX=3702 GN=RE1 PE=2 SV=1	AT1G21280.1	Putative transcription factor interactor and regulator CCHC(Zn) family OS=Rosa chinensis OX=74649 GN=RchiOBHm_Chr4g0388371 PE=4 SV=1	19.2268	36.1076	12.5826	1.88134	2.11874	0
FvH4_2g17380	97.3563	-1.09022	0.426244	-2.55773	0.0105357	0.0401421	gi|764595968|ref|XP_011465964.1|	PREDICTED: uncharacterized protein LOC101311209 isoform X2 [Fragaria vesca subsp. vesca]	-	-	-	Putative P-loop containing nucleoside triphosphate hydrolase, leucine-rich repeat domain, L OS=Rosa chinensis OX=74649 GN=RchiOBHm_Chr6g0282051 PE=3 SV=1	106.815	82.9498	122.231	47.9742	37.078	61.4814
FvH4_2g17470	926.241	-1.97447	0.247415	-7.98041	1.45847e-15	6.95463e-14	-	-	STR4A_ARATH	Rhodanese-like domain-containing protein 4A, chloroplastic OS=Arabidopsis thaliana OX=3702 GN=STR4A PE=2 SV=1	AT3G25480.1	Putative Rhodanese-like domain-containing protein OS=Rosa chinensis OX=74649 GN=RchiOBHm_Chr6g0282201 PE=4 SV=1	1275.38	1335.98	1455.08	378.15	299.802	356.592
FvH4_2g17500	977.682	-2.51034	0.285812	-8.7832	1.58894e-18	1.10391e-16	-	-	DHMA_MYCMM	Haloalkane dehalogenase OS=Mycobacterium marinum (strain ATCC BAA-535 / M) OX=216594 GN=dhmA PE=3 SV=1	AT4G12830.1	Putative haloalkane dehalogenase OS=Rosa chinensis OX=74649 GN=RchiOBHm_Chr6g0282231 PE=4 SV=1	1305.28	1242.3	1601.58	268.091	216.112	243.876
FvH4_2g17750	1071.83	2.11824	0.327032	6.47717	9.34569e-11	2.34273e-09	-	-	-	-	-	Uncharacterized protein OS=Prunus persica OX=3760 GN=PRUPE_ppa012566mg PE=4 SV=1	743.435	624.564	418.819	2975.34	2172.77	2606.81
FvH4_2g17950	508.385	-3.50052	0.24648	-14.2021	8.89694e-46	1.48789e-42	gi|470107626|ref|XP_004290145.1|	PREDICTED: EPidERMAL PATTERNING FACTOR-like protein 9 [Fragaria vesca subsp. vesca]	EPFL9_ARATH	EPidERMAL PATTERNING FACTOR-like protein 9 OS=Arabidopsis thaliana OX=3702 GN=EPFL9 PE=1 SV=1	AT4G12970.1	Putative stomagen OS=Rosa chinensis OX=74649 GN=RchiOBHm_Chr6g0283181 PE=4 SV=1	963.475	882.196	760.346	81.8384	86.8685	61.4814
FvH4_2g18000	502.529	1.33507	0.421314	3.16883	0.00153056	0.00824553	gi|470112231|ref|XP_004292340.1|	PREDICTED: cytochrome b561 and DOMON domain-containing protein At3g25290 [Fragaria vesca subsp. vesca]	B561C_ARATH	Cytochrome b561 and DOMON domain-containing protein At3g25290 OS=Arabidopsis thaliana OX=3702 GN=At3g25290 PE=2 SV=1	AT3G25290.2	Cytochrome b561 and DOMON domain-containing protein OS=Rosa chinensis OX=74649 GN=RchiOBHm_Chr6g0283371 PE=4 SV=1	316.174	318.137	212.106	791.105	823.132	520.543
FvH4_2g18001	3262.8	1.64968	0.266073	6.20009	5.64313e-10	1.2371e-08	gi|470112233|ref|XP_004292341.1|	PREDICTED: auxin-induced in root cultures protein 12 [Fragaria vesca subsp. vesca]	AIR12_ARATH	Auxin-induced in root cultures protein 12 OS=Arabidopsis thaliana OX=3702 GN=AIR12 PE=1 SV=3	AT3G07390.1	Putative DOMON domain-containing protein OS=Rosa chinensis OX=74649 GN=RchiOBHm_Chr6g0283381 PE=4 SV=1	2141.65	2570.47	1907.16	7707.86	5587.13	7473.07
FvH4_2g18050	1192	-1.54337	0.211604	-7.29368	3.01605e-13	1.09142e-11	gi|470107642|ref|XP_004290153.1|	PREDICTED: histidine triad nucleotide-binding protein 2, mitochondrial [Fragaria vesca subsp. vesca]	HINT3_ARATH	Adenylylsulfatase HINT3 OS=Arabidopsis thaliana OX=3702 GN=HINT3 PE=1 SV=1	-	Putative adenylylsulfatase OS=Rosa chinensis OX=74649 GN=RchiOBHm_Chr6g0283441 PE=4 SV=1	1788.09	1604.35	1646.52	459.048	614.436	655.802
FvH4_2g18080	347.039	-1.66714	0.519949	-3.20635	0.00134433	0.00738669	gi|470107648|ref|XP_004290156.1|	PREDICTED: GLABRA2 expression modulator-like [Fragaria vesca subsp. vesca]	-	-	-	Putative GRAM domain-containing protein OS=Rosa chinensis OX=74649 GN=RchiOBHm_Chr6g0283471 PE=4 SV=1	796.843	562.107	580.595	235.168	135.6	239.777
FvH4_2g18100	1479.94	1.76386	0.462687	3.81221	0.00013773	0.00103322	gi|470112237|ref|XP_004292343.1|	PREDICTED: transcription factor bHLH62 [Fragaria vesca subsp. vesca]	-	-	-	Putative transcription factor bHLH family OS=Rosa chinensis OX=74649 GN=RchiOBHm_Chr6g0283511 PE=4 SV=1	1226.24	1737.07	1335.55	5397.57	5728.02	3473.7
FvH4_2g18270	16.8318	-4.23017	1.37479	-3.07697	0.00209119	0.0106949	-	-	-	-	-	-	46.9988	39.0352	30.5576	0	4.23749	2.04938
FvH4_2g18350	917.422	1.12923	0.320781	3.52025	0.000431139	0.00281021	gi|470107674|ref|XP_004290168.1|	PREDICTED: putative quinone-oxidoreductase homolog, chloroplastic [Fragaria vesca subsp. vesca]	QORH_ARATH	Chloroplast envelope quinone oxidoreductase homolog OS=Arabidopsis thaliana OX=3702 GN=CEQORH PE=1 SV=1	AT4G13010.1	Putative NADPH:quinone reductase OS=Rosa chinensis OX=74649 GN=RchiOBHm_Chr6g0283721 PE=4 SV=1	828.887	1052	1044.35	2494.66	1824.24	2080.12
FvH4_2g18410	32.1908	-2.27996	0.905492	-2.51792	0.011805	0.0440953	-	-	C82C4_ARATH	Cytochrome P450 82C4 OS=Arabidopsis thaliana OX=3702 GN=CYP82C4 PE=2 SV=1	AT4G31940.1	Putative cytochrome P450 OS=Rosa chinensis OX=74649 GN=RchiOBHm_Chr6g0283881 PE=3 SV=1	10.6815	7.80704	19.7726	5.64403	2.11874	0
FvH4_2g18461	159.159	1.91518	0.56443	3.39312	0.000691008	0.00417404	-	-	SG101_ARATH	Senescence-associated carboxylesterase 101 OS=Arabidopsis thaliana OX=3702 GN=SAG101 PE=1 SV=1	AT5G14930.2	Putative carboxylesterase OS=Rosa chinensis OX=74649 GN=RchiOBHm_Chr6g0283981 PE=4 SV=1	70.4981	163.948	150.991	602.03	372.899	479.555
FvH4_2g18580	981.043	-2.33437	0.469	-4.97734	6.44644e-07	8.3341e-06	-	-	-	-	-	Uncharacterized protein OS=Rosa chinensis OX=74649 GN=RchiOBHm_Chr6g0284141 PE=4 SV=1	85.4523	68.3116	143.801	9.40671	23.3062	26.6419
FvH4_2g18750	105.435	-1.30002	0.518708	-2.50627	0.0122011	0.0452861	gi|764529118|ref|XP_004290198.2|	PREDICTED: UBX domain-containing protein 1 [Fragaria vesca subsp. vesca]	UBXN1_XENTR	UBX domain-containing protein 1 OS=Xenopus tropicalis OX=8364 GN=ubxn1 PE=2 SV=1	AT1G04850.2	Putative PUB domain-containing protein OS=Rosa chinensis OX=74649 GN=RchiOBHm_Chr6g0284441 PE=4 SV=1	158.087	89.781	193.232	24.4575	70.9779	84.0246
FvH4_2g18770	2105.5	-1.35992	0.307295	-4.42545	9.62421e-06	9.86134e-05	gi|470107740|ref|XP_004290200.1|	PREDICTED: small ubiquitin-related modifier 2 [Fragaria vesca subsp. vesca]	SUMO2_ARATH	Small ubiquitin-related modifier 2 OS=Arabidopsis thaliana OX=3702 GN=SUMO2 PE=1 SV=1	AT5G55160.1	Small ubiquitin-related modifier OS=Rosa chinensis OX=74649 GN=RchiOBHm_Chr6g0284511 PE=3 SV=1	2850.9	2136.2	2414.95	1018.75	1130.35	734.703
FvH4_2g18930	125.558	1.69568	0.362141	4.68236	2.83586e-06	3.23882e-05	-	-	DCL3A_ORYSJ	Endoribonuclease Dicer homolog 3a OS=Oryza sativa subsp. japonica OX=39947 GN=DCL3A PE=2 SV=1	AT3G43920.2	Putative ribonuclease III post-transcriptional gene silencing PAZ-Argonaute family OS=Rosa chinensis OX=74649 GN=RchiOBHm_Chr6g0284721 PE=3 SV=1	153.814	74.1669	98.863	346.167	245.774	465.209
FvH4_2g18990	101.517	-1.2168	0.330047	-3.68674	0.000227144	0.00160571	-	-	-	-	-	Laccase OS=Rosa chinensis OX=74649 GN=RchiOBHm_Chr6g0284751 PE=3 SV=1	176.245	120.033	123.129	57.3809	61.4436	61.4814
FvH4_2g19020	882.194	-1.25235	0.329503	-3.80071	0.000144282	0.00107309	-	-	-	-	-	Putative transferase, protein kinase RLK-Pelle-LRR-I-1 family OS=Rosa chinensis OX=74649 GN=RchiOBHm_Chr6g0284821 PE=4 SV=1	1984.63	1357.45	1669.89	518.31	640.92	944.764
FvH4_2g19200	9.2701	5.07048	1.95522	2.5933	0.00950592	0.0369152	gi|470112306|ref|XP_004292377.1|	PREDICTED: serine/threonine-protein kinase At3g07070 [Fragaria vesca subsp. vesca]	PBL26_ARATH	Probable serine/threonine-protein kinase PBL26 OS=Arabidopsis thaliana OX=3702 GN=PBL26 PE=2 SV=1	AT3G07070.1	Uncharacterized protein OS=Rosa chinensis OX=74649 GN=RchiOBHm_Chr6g0284981 PE=3 SV=1	0	0	0	5.64403	6.35623	6.14814
FvH4_2g19300	414.97	1.16438	0.276237	4.21516	2.496e-05	0.000230437	gi|470107789|ref|XP_004290223.1|	PREDICTED: pantoate--beta-alanine ligase [Fragaria vesca subsp. vesca]	PANC_ARATH	Pantoate--beta-alanine ligase OS=Arabidopsis thaliana OX=3702 GN=At5g48840 PE=1 SV=1	AT5G48840.1	Putative pantoate--beta-alanine ligase (AMP-forming) OS=Rosa chinensis OX=74649 GN=RchiOBHm_Chr6g0285101 PE=3 SV=1	310.833	404.99	478.137	888.934	924.831	863.814
FvH4_2g19360	30.797	-2.73236	1.0726	-2.54742	0.0108523	0.0411406	gi|764547953|ref|XP_011459738.1|	PREDICTED: uncharacterized protein LOC101311157 [Fragaria vesca subsp. vesca]	-	-	-	Uncharacterized protein OS=Rosa chinensis OX=74649 GN=RchiOBHm_Chr6g0285151 PE=4 SV=1	32.0446	132.72	130.319	15.0507	21.1874	8.19752
FvH4_2g19540	1956.35	-1.45616	0.278645	-5.22585	1.73355e-07	2.50897e-06	gi|470107808|ref|XP_004290232.1|	PREDICTED: probable pectate lyase 20 [Fragaria vesca subsp. vesca]	-	-	-	Pectate lyase OS=Fragaria chiloensis OX=101007 GN=PL1 PE=2 SV=1	2402.28	2552.9	1928.73	748.774	646.217	1113.84
FvH4_2g19580	818.576	-1.03159	0.287163	-3.59235	0.000327707	0.00220441	gi|470107811|ref|XP_004290233.1|	PREDICTED: uncharacterized protein LOC101302315 [Fragaria vesca subsp. vesca]	-	-	-	Uncharacterized protein OS=Rosa chinensis OX=74649 GN=RchiOBHm_Chr6g0285341 PE=4 SV=1	1373.65	872.437	1213.32	475.98	468.242	748.024
FvH4_2g19620	56.1461	2.90111	1.06419	2.72613	0.00640827	0.0267207	gi|764529613|ref|XP_011458212.1|	PREDICTED: LRR receptor-like serine/threonine-protein kinase RCH1 [Fragaria vesca subsp. vesca]	RCH1_ARATH	LRR receptor-like serine/threonine-protein kinase RCH1 OS=Arabidopsis thaliana OX=3702 GN=RCH1 PE=1 SV=1	AT5G48940.1	Uncharacterized protein OS=Rosa chinensis OX=74649 GN=RchiOBHm_Chr6g0285351 PE=3 SV=1	12.8178	37.0835	52.1277	84.6604	190.687	487.752
FvH4_2g19680	4291.07	-1.96982	0.624344	-3.15503	0.00160483	0.00857069	gi|470107817|ref|XP_004290236.1|	PREDICTED: acanthoscurrin-2-like [Fragaria vesca subsp. vesca]	-	-	-	Glycine-rich protein 23-like OS=Prunus yedoensis var. nudiflora OX=2094558 GN=Pyn_07001 PE=4 SV=1	2153.4	2465.07	2058.15	366.862	829.488	508.246
FvH4_2g19790	530.962	-1.34205	0.294808	-4.55228	5.30685e-06	5.72577e-05	gi|764527759|ref|XP_011458065.1|	PREDICTED: transcription factor PIF1 [Fragaria vesca subsp. vesca]	PIF1_ARATH	Transcription factor PIF1 OS=Arabidopsis thaliana OX=3702 GN=PIF1 PE=1 SV=1	AT2G20180.6	Putative transcription factor bHLH family OS=Rosa chinensis OX=74649 GN=RchiOBHm_Chr6g0285491 PE=4 SV=1	739.162	573.818	704.623	225.761	266.962	303.308
FvH4_2g19930	950.553	-1.29861	0.167788	-7.73958	9.97443e-15	4.34073e-13	-	-	BDG4_ARATH	Probable lysophospholipase BODYGUARD 4 OS=Arabidopsis thaliana OX=3702 GN=BDG4 PE=2 SV=1	AT5G17780.2	Putative dihydrolipoyllysine-residue acetyltransferase OS=Rosa chinensis OX=74649 GN=RchiOBHm_Chr3g0495891 PE=4 SV=1	910.067	753.38	920.324	374.387	358.068	317.654
FvH4_2g19960	43671.6	-2.15428	0.277641	-7.75922	8.54543e-15	3.74671e-13	-	-	PSAEA_NICSY	Photosystem I reaction center subunit IV A, chloroplastic OS=Nicotiana sylvestris OX=4096 GN=PSAEA PE=1 SV=1	-	Photosystem I reaction center subunit IV A OS=Medicago truncatula OX=3880 GN=11430839 PE=2 SV=1	59075.3	54153.6	60612	11131.9	15091.8	12829.1
FvH4_2g19990	4334.48	-1.46769	0.200986	-7.30246	2.82557e-13	1.02885e-11	-	-	-	-	-	Uncharacterized protein OS=Rosa chinensis OX=74649 GN=RchiOBHm_Chr6g0285711 PE=4 SV=1	6593.71	5211.2	7157.68	2069.48	2432.32	2354.74
FvH4_2g20010	44.374	3.19973	0.900433	3.55355	0.000380069	0.00251941	-	-	-	-	-	Putative glutathione transferase OS=Rosa chinensis OX=74649 GN=RchiOBHm_Chr6g0285721 PE=3 SV=1	12.8178	17.5658	22.4689	168.38	259.546	58.4073
FvH4_2g20020	41.2802	2.71793	0.929942	2.92269	0.00347024	0.0161625	-	-	-	-	-	Putative glutathione transferase OS=Rosa chinensis OX=74649 GN=RchiOBHm_Chr6g0285721 PE=3 SV=1	26.7038	29.2764	13.4813	143.923	222.468	90.1727
FvH4_2g20030	152.524	2.59762	0.586797	4.42679	9.56467e-06	9.80892e-05	-	-	-	-	-	Putative glutathione transferase OS=Rosa chinensis OX=74649 GN=RchiOBHm_Chr6g0285731 PE=3 SV=1	46.9988	81.974	102.458	532.42	654.692	215.185
FvH4_2g20060	97.7883	2.81232	1.13206	2.48426	0.0129822	0.0476189	-	-	-	-	-	Putative glutathione transferase OS=Rosa chinensis OX=74649 GN=RchiOBHm_Chr6g0285781 PE=3 SV=1	33.1128	80.0222	46.7352	430.827	551.933	140.383
FvH4_2g20070	441.837	2.11991	0.622236	3.40692	0.000657008	0.00400066	-	-	-	-	-	Putative glutathione transferase OS=Rosa chinensis OX=74649 GN=RchiOBHm_Chr6g0285821 PE=3 SV=1	242.471	503.554	420.617	1920.85	2562.62	588.172
FvH4_2g20090	7123.24	2.08006	0.373802	5.5646	2.62748e-08	4.42251e-07	-	-	-	-	-	Putative glutathione transferase OS=Rosa chinensis OX=74649 GN=RchiOBHm_Chr6g0285821 PE=3 SV=1	4298.25	6085.59	5654.96	22946.7	30588.3	14282.1
FvH4_2g20091	1744.49	2.09552	0.805686	2.60092	0.00929743	0.0362741	-	-	-	-	-	Putative glutathione transferase OS=Rosa chinensis OX=74649 GN=RchiOBHm_Chr6g0285821 PE=3 SV=1	1040.38	2047.4	1662.7	6306.26	10592.7	3404.02
FvH4_2g20100	1048.24	-1.36425	0.216352	-6.30569	2.86915e-10	6.59876e-09	-	-	-	-	-	Putative thioredoxin-disulfide reductase OS=Rosa chinensis OX=74649 GN=RchiOBHm_Chr6g0285841 PE=4 SV=1	1610.78	1340.86	1726.51	592.623	532.864	691.666
FvH4_2g20180	1070.02	-1.26431	0.19884	-6.35841	2.0385e-10	4.7919e-09	-	-	KHK_PONAB	Ketohexokinase OS=Pongo abelii OX=9601 GN=KHK PE=3 SV=1	AT4G28706.1	Putative ketohexokinase OS=Rosa chinensis OX=74649 GN=RchiOBHm_Chr6g0285941 PE=3 SV=1	1274.31	1208.14	1403.85	513.607	595.367	509.271
FvH4_2g20360	182.583	-1.6354	0.391009	-4.1825	2.88316e-05	0.00026043	-	-	-	-	-	Uncharacterized protein OS=Rosa chinensis OX=74649 GN=RchiOBHm_Chr6g0286731 PE=4 SV=1	314.037	312.282	273.221	58.3216	125.006	106.568
FvH4_2g20390	1462.14	1.18387	0.158146	7.48593	7.10447e-14	2.79089e-12	-	-	-	-	-	Putative exostosin OS=Rosa chinensis OX=74649 GN=RchiOBHm_Chr6g0286491 PE=4 SV=1	976.293	1224.73	1162.99	2727.01	2135.69	2781.01
FvH4_2g20400	42.5683	7.28435	2.61907	2.78127	0.0054146	0.0233123	-	-	-	-	-	Putative chlorophyll A-B binding protein OS=Rosa chinensis OX=74649 GN=RchiOBHm_Chr6g0286501 PE=4 SV=1	0	3.90352	0.898754	361.218	241.537	147.555
FvH4_2g20460	98.0817	-3.42563	0.907161	-3.77621	0.000159233	0.00117163	-	-	-	-	-	Putative tripeptidyl-peptidase II OS=Rosa chinensis OX=74649 GN=RchiOBHm_Chr6g0286551 PE=4 SV=1	292.674	316.185	93.4704	5.64403	10.5937	49.1851
FvH4_2g20470	2506.96	-2.63244	0.272986	-9.64315	5.25485e-22	5.61789e-20	-	-	-	-	-	Photosystem II reaction center Psb28 protein OS=Prunus persica OX=3760 GN=PRUPE_8G215000 PE=3 SV=1	3434.11	3288.72	4394.91	635.894	470.361	686.542
FvH4_2g20480	222.409	1.57716	0.381192	4.13744	3.51207e-05	0.000310764	-	-	-	-	-	Putative aminopyrimidine aminohydrolase OS=Rosa chinensis OX=74649 GN=RchiOBHm_Chr6g0286581 PE=4 SV=1	179.45	199.08	129.421	605.792	536.042	372.987
FvH4_2g20500	2425.69	1.28623	0.169269	7.59873	2.99058e-14	1.21984e-12	-	-	-	-	-	Auxin-responsive protein OS=Rosa chinensis OX=74649 GN=RchiOBHm_Chr6g0286601 PE=3 SV=1	1578.73	1762.44	1766.95	4232.08	4128.37	4098.76
FvH4_2g20620	164.012	1.48279	0.391958	3.78302	0.000154934	0.00114431	gi|764527250|ref|XP_011458039.1|	PREDICTED: homeobox-leucine zipper protein MERISTEM L1-like isoform X1 [Fragaria vesca subsp. vesca]	PDF2_ARATH	Homeobox-leucine zipper protein PROTODERMAL FACTOR 2 OS=Arabidopsis thaliana OX=3702 GN=PDF2 PE=2 SV=1	AT4G04890.2	Putative START domain-containing protein OS=Rosa chinensis OX=74649 GN=RchiOBHm_Chr6g0286791 PE=4 SV=1	66.2255	64.4081	44.9377	235.168	133.481	120.913
FvH4_2g20670	5928.86	1.53685	0.564228	2.7238	0.0064535	0.0268663	gi|470107295|ref|XP_004289983.1|	PREDICTED: 60S ribosomal protein L23-like [Fragaria vesca subsp. vesca]	RL23_ARATH	60S ribosomal protein L23 OS=Arabidopsis thaliana OX=3702 GN=RPL23A PE=2 SV=3	AT3G04400.1	Putative ribosomal protein L14P OS=Rosa chinensis OX=74649 GN=RchiOBHm_Chr6g0286851 PE=3 SV=1	3233.3	3878.15	3308.31	7311.84	16683	6239.34
FvH4_2g20740	2801.97	-1.98696	0.456742	-4.35028	1.35967e-05	0.00013449	gi|470107289|ref|XP_004289981.1|	PREDICTED: cellulose synthase A catalytic subunit 4 [UDP-forming]	CESA4_ARATH	Cellulose synthase A catalytic subunit 4 [UDP-forming] OS=Arabidopsis thaliana OX=3702 GN=CESA4 PE=1 SV=1	AT5G44030.1	Cellulose synthase OS=Rosa chinensis OX=74649 GN=RchiOBHm_Chr6g0286921 PE=3 SV=1	427.261	346.438	280.411	100.652	65.681	99.3949
FvH4_2g20780	153.309	1.26786	0.313637	4.04246	5.28927e-05	0.000441888	gi|1365968295|ref|XP_024183485.1|	uncharacterized protein LOC112188576 [Rosa chinensis]	-	-	-	Putative replication protein A, OB OS=Rosa chinensis OX=74649 GN=RchiOBHm_Chr2g0150581 PE=4 SV=1	99.3383	143.454	119.534	283.142	336.88	253.098
FvH4_2g20842	273.859	-1.40264	0.381071	-3.6808	0.000232508	0.00163819	gi|1358180615|gb|PRQ55089.1|	putative RNA-directed DNA polymerase [Rosa chinensis]	POLR1_ARATH	Retrovirus-related Pol polyprotein from transposon RE1 OS=Arabidopsis thaliana OX=3702 GN=RE1 PE=2 SV=1	AT4G23160.3	Putative RNA-directed DNA polymerase OS=Rosa chinensis OX=74649 GN=RchiOBHm_Chr1g0320771 PE=4 SV=1	482.805	513.313	713.611	250.219	216.112	180.345
FvH4_2g20850	39.5796	-4.23458	1.69066	-2.50469	0.0122559	0.0454533	gi|470107283|ref|XP_004289978.1|	PREDICTED: protein NRT1/ PTR FAMILY 5.2-like [Fragaria vesca subsp. vesca]	PTR3_ARATH	Protein NRT1/ PTR FAMILY 5.2 OS=Arabidopsis thaliana OX=3702 GN=NPF5.2 PE=2 SV=1	AT5G46050.1	Putative proton-dependent oligopeptide transporter family, major facilitator superfamily OS=Rosa chinensis OX=74649 GN=RchiOBHm_Chr6g0287251 PE=4 SV=1	10.6815	0	0	0	0	0
FvH4_2g21080	16.4339	-5.08372	1.74581	-2.91196	0.00359172	0.016629	gi|470111986|ref|XP_004292220.1|	PREDICTED: CRIB domain-containing protein RIC6 [Fragaria vesca subsp. vesca]	RIC6_ARATH	CRIB domain-containing protein RIC6 OS=Arabidopsis thaliana OX=3702 GN=RIC6 PE=1 SV=1	AT2G20430.1	Putative CRIB domain-containing protein OS=Rosa chinensis OX=74649 GN=RchiOBHm_Chr6g0287541 PE=4 SV=1	0	9.75881	8.98754	0	0	0
FvH4_2g21220	1502.59	1.05619	0.388957	2.71545	0.00661865	0.0274124	-	-	NOP10_ARATH	H/ACA ribonucleoprotein complex subunit 3-like protein OS=Arabidopsis thaliana OX=3702 GN=At2g20490 PE=3 SV=2	-	Putative H/ACA ribonucleoprotein complex, subunit Nop10 OS=Rosa chinensis OX=74649 GN=RchiOBHm_Chr6g0287721 PE=4 SV=1	1232.65	1217.9	1137.82	1672.51	4355.08	1434.57
FvH4_2g21340	3025.07	-1.58819	0.266226	-5.96558	2.43769e-09	4.91589e-08	-	-	-	-	-	Putative ribosomal protein L10P OS=Rosa chinensis OX=74649 GN=RchiOBHm_Chr6g0287931 PE=3 SV=1	4364.48	3552.21	4447.04	1497.55	1292.43	1321.85
FvH4_2g21540	3432.49	1.59553	0.251191	6.35185	2.12744e-10	4.99097e-09	-	-	PHT17_ARATH	Probable inorganic phosphate transporter 1-7 OS=Arabidopsis thaliana OX=3702 GN=PHT1-7 PE=2 SV=2	AT3G54700.2	Putative phosphate-transporting ATPase OS=Rosa chinensis OX=74649 GN=RchiOBHm_Chr6g0288211 PE=4 SV=1	2599.89	3013.52	3050.37	10727.4	7321.32	8133.99
FvH4_2g21550	40.2544	2.75175	1.06351	2.58742	0.00966989	0.0374642	-	-	ERF92_ARATH	Ethylene-responsive transcription factor 1B OS=Arabidopsis thaliana OX=3702 GN=ERF1B PE=1 SV=2	AT3G23240.1	Putative transcription factor AP2-EREBP family OS=Rosa chinensis OX=74649 GN=RchiOBHm_Chr6g0288231 PE=4 SV=1	53.4077	11.7106	10.7851	201.304	165.262	143.457
FvH4_2g21600	5.80453	6.78011	2.03465	3.33232	0.00086124	0.00503853	-	-	ERF98_ARATH	Ethylene-responsive transcription factor ERF098 OS=Arabidopsis thaliana OX=3702 GN=ERF098 PE=1 SV=1	AT3G23230.1	Putative transcription factor AP2-EREBP family OS=Rosa chinensis OX=74649 GN=RchiOBHm_Chr6g0288281 PE=4 SV=1	0	0	0	17.8728	14.8312	26.6419
FvH4_2g21772	1325.69	-1.61325	0.271977	-5.93156	3.00076e-09	5.95901e-08	-	-	-	-	-	hyoscyamine 6-dioxygenase-like OS=Juglans regia OX=51240 GN=LOC108994458 PE=3 SV=1	1879.95	2091.31	2110.27	617.08	750.035	620.962
FvH4_2g21830	70.3119	2.41001	0.706831	3.4096	0.000650577	0.00397013	gi|470107171|ref|XP_004289923.1|	PREDICTED: 1-aminocyclopropane-1-carboxylate oxidase homolog 1-like [Fragaria vesca subsp. vesca]	ACCH1_ARATH	1-aminocyclopropane-1-carboxylate oxidase homolog 1 OS=Arabidopsis thaliana OX=3702 GN=At1g06620 PE=2 SV=1	AT1G06620.1	Putative deacetoxyvindoline 4-hydroxylase OS=Rosa chinensis OX=74649 GN=RchiOBHm_Chr6g0288551 PE=3 SV=1	12.8178	27.3247	5.39253	62.0843	99.5809	79.9258
FvH4_2g21910	3686.76	1.14024	0.395518	2.8829	0.00394035	0.017959	gi|764526603|ref|XP_004289922.2|	PREDICTED: 1-aminocyclopropane-1-carboxylate oxidase homolog 11-like [Fragaria vesca subsp. vesca]	ACCH1_ARATH	1-aminocyclopropane-1-carboxylate oxidase homolog 1 OS=Arabidopsis thaliana OX=3702 GN=At1g06620 PE=2 SV=1	AT1G06620.1	Putative deacetoxyvindoline 4-hydroxylase OS=Rosa chinensis OX=74649 GN=RchiOBHm_Chr6g0288661 PE=3 SV=1	3170.28	4397.32	4714.86	7687.17	8454.84	10931.4
FvH4_2g21940	999.355	6.37448	0.843823	7.55429	4.21167e-14	1.69721e-12	gi|470107167|ref|XP_004289921.1|	PREDICTED: LOB domain-containing protein 29-like [Fragaria vesca subsp. vesca]	LBD29_ARATH	LOB domain-containing protein 29 OS=Arabidopsis thaliana OX=3702 GN=LBD29 PE=2 SV=1	AT3G58190.1	Putative transcription factor AS2-LOB family OS=Rosa chinensis OX=74649 GN=RchiOBHm_Chr6g0288831 PE=4 SV=1	29.9083	19.5176	159.978	6187.74	7267.29	3943.01
FvH4_2g21950	197.974	5.74314	0.540918	10.6174	2.47384e-26	4.38788e-24	gi|470107165|ref|XP_004289920.1|	PREDICTED: LOB domain-containing protein 29-like [Fragaria vesca subsp. vesca]	LBD17_ARATH	LOB domain-containing protein 17 OS=Arabidopsis thaliana OX=3702 GN=LBD17 PE=2 SV=1	AT2G42440.1	Putative transcription factor AS2-LOB family OS=Rosa chinensis OX=74649 GN=RchiOBHm_Chr6g0288841 PE=4 SV=1	17.0905	13.6623	30.5576	1274.61	1056.19	965.258
FvH4_2g21970	474.5	6.52489	0.518234	12.5906	2.37784e-36	1.29471e-33	gi|470107163|ref|XP_004289919.1|	PREDICTED: LOB domain-containing protein 16 [Fragaria vesca subsp. vesca]	LBD16_ARATH	LOB domain-containing protein 16 OS=Arabidopsis thaliana OX=3702 GN=LBD16 PE=1 SV=1	AT2G42430.1	Uncharacterized protein OS=Prunus persica OX=3760 GN=PRUPE_8G227500 PE=4 SV=1	38.4535	25.3729	25.1651	2823.9	2495.88	2857.86
FvH4_2g21981	136.369	6.24514	2.15348	2.90002	0.00373137	0.0171636	-	-	-	-	-	-	6.40892	17.5658	7.19003	1837.13	511.676	15.3704
FvH4_2g21990	26.3089	-5.24823	1.42095	-3.69346	0.000221223	0.00156859	gi|470108572|ref|XP_004290589.1|	PREDICTED: bidirectional sugar transporter SWEET1-like [Fragaria vesca subsp. vesca]	SWET1_ARATH	Bidirectional sugar transporter SWEET1 OS=Arabidopsis thaliana OX=3702 GN=SWEET1 PE=1 SV=1	AT1G21460.2	Uncharacterized protein OS=Gossypium raimondii OX=29730 GN=B456_005G082900 PE=3 SV=1	53.4077	46.8423	57.5203	0	4.23749	0
FvH4_2g22090	10.7304	8.35524	2.41218	3.46377	0.000532662	0.00336229	-	-	-	-	-	-	0	0	0	107.237	59.3248	10.2469
FvH4_2g22270	4.15168	-5.63633	1.96127	-2.87381	0.00405554	0.0183932	gi|470111921|ref|XP_004292189.1|	PREDICTED: uncharacterized protein LOC101291597 [Fragaria vesca subsp. vesca]	-	-	-	Putative Zeta toxin domain, P-loop containing nucleoside triphosphate hydrolase OS=Rosa chinensis OX=74649 GN=RchiOBHm_Chr6g0289231 PE=4 SV=1	12.8178	5.85528	8.98754	0	0	0
FvH4_2g22460	697.276	1.26914	0.18899	6.71541	1.8754e-11	5.17792e-10	gi|470107106|ref|XP_004289891.1|	PREDICTED: probable galacturonosyltransferase 6 isoform X2 [Fragaria vesca subsp. vesca]	GAUT6_ARATH	Probable galacturonosyltransferase 6 OS=Arabidopsis thaliana OX=3702 GN=GAUT6 PE=2 SV=1	AT1G06780.1	Hexosyltransferase OS=Rosa chinensis OX=74649 GN=RchiOBHm_Chr6g0289401 PE=3 SV=1	496.691	532.831	467.352	1162.67	1184.38	1260.37
FvH4_2g22470	49340.7	-2.01774	0.310929	-6.48938	8.61926e-11	2.16526e-09	gi|470107131|ref|XP_004289903.1|	PREDICTED: photosystem II reaction center W protein, chloroplastic [Fragaria vesca subsp. vesca]	PSBW_SPIOL	Photosystem II reaction center W protein, chloroplastic OS=Spinacia oleracea OX=3562 GN=psbW PE=1 SV=1	AT2G30570.1	Putative photosystem II PsbW, class 2 OS=Rosa chinensis OX=74649 GN=RchiOBHm_Chr6g0289411 PE=4 SV=1	75954.3	56075.1	70415.6	16147.6	17143.8	16701.4
FvH4_2g22540	1039.37	-1.32336	0.263772	-5.01708	5.24621e-07	6.91997e-06	gi|470107127|ref|XP_004289901.1|	PREDICTED: protein OSB2, chloroplastic-like [Fragaria vesca subsp. vesca]	OSB1_ARATH	Protein OSB1, mitochondrial OS=Arabidopsis thaliana OX=3702 GN=OSB1 PE=1 SV=1	AT1G47720.1	Putative primosome PriB/single-strand DNA-binding protein OS=Rosa chinensis OX=74649 GN=RchiOBHm_Chr6g0289591 PE=4 SV=1	1219.83	1159.35	1429.02	545.589	521.211	454.962
FvH4_2g22810	1651.18	1.21836	0.397553	3.06465	0.00217923	0.0110629	-	-	-	-	-	Uncharacterized protein OS=Rosa chinensis OX=74649 GN=RchiOBHm_Chr6g0289731 PE=4 SV=1	1485.8	1649.24	1089.29	3006.39	3289.35	3533.13
FvH4_2g22900	1379.7	1.33683	0.242602	5.5104	3.58009e-08	5.87391e-07	-	-	-	-	-	Calcium-transporting ATPase OS=Rosa chinensis OX=74649 GN=RchiOBHm_Chr6g0289831 PE=3 SV=1	751.98	833.402	751.358	2579.32	1418.5	1903.87
FvH4_2g22991	290.545	-1.25018	0.341833	-3.65727	0.000254917	0.00176946	-	-	-	-	-	-	336.468	432.315	423.313	131.694	252.13	117.839
FvH4_2g23000	3843.05	-1.70669	0.256221	-6.66102	2.71941e-11	7.38627e-10	gi|470108667|ref|XP_004290633.1|	PREDICTED: heat stress transcription factor A-7a [Fragaria vesca subsp. vesca]	HFA6B_ARATH	Heat stress transcription factor A-6b OS=Arabidopsis thaliana OX=3702 GN=HSFA6b PE=2 SV=1	AT3G22830.1	Heat shock factor A6a OS=Fragaria vesca OX=57918 PE=2 SV=1	5590.72	6254.42	6787.39	1778.81	2099.67	1830.1
FvH4_2g23300	94.8263	4.98718	0.744249	6.70095	2.07073e-11	5.67705e-10	-	-	-	-	-	Uncharacterized protein OS=Prunus persica OX=3760 GN=PRUPE_8G238700 PE=4 SV=1	17.0905	23.4211	1.79751	511.725	370.78	452.913
FvH4_2g23371	253.107	-2.06304	0.319481	-6.45747	1.06465e-10	2.64613e-09	gi|470108608|ref|XP_004290604.1|	PREDICTED: uncharacterized protein LOC101298849 [Fragaria vesca subsp. vesca]	-	-	AT4G02725.1	Uncharacterized protein OS=Rosa chinensis OX=74649 GN=RchiOBHm_Chr6g0290831 PE=4 SV=1	478.533	289.837	381.072	125.109	90.0466	59.432
FvH4_2g23500	3201.47	-1.6979	0.236729	-7.17236	7.37135e-13	2.5195e-11	gi|470108703|ref|XP_004290648.1|	PREDICTED: ribosome-recycling factor, chloroplastic [Fragaria vesca subsp. vesca]	RRFC_SPIOL	Ribosome-recycling factor, chloroplastic OS=Spinacia oleracea OX=3562 GN=RRF PE=1 SV=1	AT3G63190.1	Putative ribosome recycling factor OS=Rosa chinensis OX=74649 GN=RchiOBHm_Chr6g0290971 PE=3 SV=1	4832.33	4036.24	5615.42	1279.31	1718.3	1467.36
FvH4_2g23520	1303.23	-1.22383	0.353523	-3.46183	0.000536524	0.00337769	gi|470108707|ref|XP_004290650.1|	PREDICTED: probable inactive patatin-like protein 9 [Fragaria vesca subsp. vesca]	PLP9_ARATH	Probable inactive patatin-like protein 9 OS=Arabidopsis thaliana OX=3702 GN=PLP9 PE=2 SV=1	AT3G63200.1	Patatin OS=Rosa chinensis OX=74649 GN=RchiOBHm_Chr6g0290991 PE=3 SV=1	1553.1	1356.47	1082.1	274.676	822.072	612.765
FvH4_2g23570	5113.31	-2.77948	0.319242	-8.70651	3.13367e-18	2.07843e-16	gi|470108717|ref|XP_004290655.1|	PREDICTED: chloroplast stem-loop binding protein of 41 kDa a, chloroplastic [Fragaria vesca subsp. vesca]	CP41A_ARATH	Chloroplast stem-loop binding protein of 41 kDa a, chloroplastic OS=Arabidopsis thaliana OX=3702 GN=CSP41A PE=1 SV=1	AT3G63140.1	Putative NAD(P)-binding domain-containing protein OS=Rosa chinensis OX=74649 GN=RchiOBHm_Chr6g0291041 PE=4 SV=1	7641.57	6414.46	9258.97	1113.75	968.266	1313.65
FvH4_2g23600	3292.11	-1.68923	0.197592	-8.54907	1.24081e-17	7.57313e-16	gi|470108721|ref|XP_004290657.1|	PREDICTED: uncharacterized protein LOC101291108 [Fragaria vesca subsp. vesca]	FZL_ARATH	Probable transmembrane GTPase FZO-like, chloroplastic OS=Arabidopsis thaliana OX=3702 GN=FZL PE=1 SV=1	AT1G03160.1	Putative aldolase-type TIM barrel, P-loop containing nucleoside triphosphate hydrolase OS=Rosa chinensis OX=74649 GN=RchiOBHm_Chr6g0291071 PE=4 SV=1	4229.89	4606.16	4900.01	1350.8	1402.61	1506.29
FvH4_2g23671	102.217	-1.36934	0.514219	-2.66296	0.00774568	0.0311973	gi|470112749|ref|XP_004292593.1|	PREDICTED: uncharacterized protein LOC101313771 [Fragaria vesca subsp. vesca]	-	-	-	Uncharacterized protein OS=Rosa chinensis OX=74649 GN=RchiOBHm_Chr6g0291141 PE=4 SV=1	151.678	148.334	131.218	39.5082	78.3935	49.1851
FvH4_2g23720	1096.77	-1.12545	0.272439	-4.13103	3.61149e-05	0.000317759	gi|470108735|ref|XP_004290664.1|	PREDICTED: protein trichome birefringence-like 10 [Fragaria vesca subsp. vesca]	-	-	-	Putative PMR5 domain, PC-Esterase OS=Rosa chinensis OX=74649 GN=RchiOBHm_Chr6g0291221 PE=4 SV=1	962.407	1315.49	1425.42	669.758	495.786	531.814
FvH4_2g23750	1828.72	1.0612	0.269592	3.93634	8.27334e-05	0.000660203	gi|764534535|ref|XP_011458616.1|	PREDICTED: 6.7 kDa chloroplast outer envelope membrane protein [Fragaria vesca subsp. vesca]	-	-	-	Uncharacterized protein OS=Rosa chinensis OX=74649 GN=RchiOBHm_Chr6g0291241 PE=4 SV=1	1452.69	1616.06	1533.27	2671.51	5077.57	1854.69
FvH4_2g23890	583.098	2.10547	0.357519	5.8891	3.88316e-09	7.53242e-08	gi|470112759|ref|XP_004292598.1|	PREDICTED: RING-H2 finger protein ATL54-like [Fragaria vesca subsp. vesca]	ATL54_ARATH	RING-H2 finger protein ATL54 OS=Arabidopsis thaliana OX=3702 GN=ATL54 PE=2 SV=2	AT1G72220.1	Putative transcription factor C2H2 family OS=Rosa chinensis OX=74649 GN=RchiOBHm_Chr6g0291501 PE=4 SV=1	300.151	520.144	479.935	2087.35	1753.26	1756.32
FvH4_2g24060	143.391	-1.32767	0.521814	-2.54434	0.0109485	0.0414448	-	-	GDL22_ARATH	GDSL esterase/lipase At1g54790 OS=Arabidopsis thaliana OX=3702 GN=At1g54790 PE=2 SV=1	AT1G54790.1	Putative alpha-L-fucosidase OS=Rosa chinensis OX=74649 GN=RchiOBHm_Chr6g0291841 PE=3 SV=1	32.0446	21.4694	12.5826	9.40671	10.5937	6.14814
FvH4_2g24160	1633.69	-1.04298	0.266618	-3.9119	9.15735e-05	0.000719466	-	-	MTEF4_ARATH	Transcription termination factor MTERF4, chloroplastic OS=Arabidopsis thaliana OX=3702 GN=MTERF4 PE=1 SV=1	-	Putative transcription regulator mTERF family OS=Rosa chinensis OX=74649 GN=RchiOBHm_Chr6g0291971 PE=4 SV=1	2238.85	1733.16	2728.62	1104.35	712.957	1434.57
FvH4_2g24170	2648.01	-2.22314	0.307607	-7.2272	4.93069e-13	1.73077e-11	-	-	-	-	-	Uncharacterized protein OS=Rosa chinensis OX=74649 GN=RchiOBHm_Chr6g0291981 PE=4 SV=1	4379.43	3097.44	4471.3	797.689	779.698	981.653
FvH4_2g24250	375.993	2.16377	0.406274	5.3259	1.00454e-07	1.5125e-06	-	-	-	-	-	Putative GH3 family protein OS=Rosa chinensis OX=74649 GN=RchiOBHm_Chr6g0292061 PE=4 SV=1	29.9083	122.961	50.3302	366.862	296.624	247.975
FvH4_2g24280	1624.16	-1.44758	0.24779	-5.84194	5.15958e-09	9.81326e-08	-	-	-	-	-	Putative major facilitator, sugar transporter, major facilitator superfamily OS=Rosa chinensis OX=74649 GN=RchiOBHm_Chr6g0292101 PE=3 SV=1	1940.84	1902.97	2426.64	664.114	972.503	662.975
FvH4_2g24290	2707.53	-1.14187	0.271012	-4.21334	2.51618e-05	0.000232117	-	-	-	-	-	Putative major facilitator, sugar transporter, major facilitator superfamily OS=Rosa chinensis OX=74649 GN=RchiOBHm_Chr6g0292141 PE=3 SV=1	1735.75	2370.41	1917.94	742.19	1107.04	881.233
FvH4_2g24334	18.5003	4.53437	1.45814	3.10971	0.00187274	0.00974533	gi|1365959623|ref|XP_024179324.1|	uncharacterized protein LOC112185317 [Rosa chinensis]	-	-	-	Uncharacterized protein OS=Rosa chinensis OX=74649 GN=RchiOBHm_Chr0c19g0500051 PE=4 SV=1	0	1.95176	0	15.0507	15.8906	14.3457
FvH4_2g24370	5322.26	1.20764	0.345022	3.50019	0.000464927	0.00300534	-	-	Gid1B_ARATH	Gibberellin receptor Gid1B OS=Arabidopsis thaliana OX=3702 GN=Gid1B PE=1 SV=1	AT3G63010.1	Putative carboxylesterase OS=Rosa chinensis OX=74649 GN=RchiOBHm_Chr6g0292241 PE=4 SV=1	3480.04	4366.09	3386.51	9734.07	7451.62	8757
FvH4_2g24430	3122.03	-1.21282	0.425604	-2.84965	0.00437671	0.0195707	-	-	H2AX_CICAR	Histone H2AX OS=Cicer arietinum OX=3827 GN=HIS2A PE=2 SV=1	AT1G08880.1	Histone H2A OS=Rosa chinensis OX=74649 GN=RchiOBHm_Chr6g0292261 PE=3 SV=1	6492.24	5321.48	3526.71	1413.83	3606.1	1598.52
FvH4_2g24440	651.137	1.22608	0.369584	3.31747	0.000908367	0.00526295	-	-	H2AX_CICAR	Histone H2AX OS=Cicer arietinum OX=3827 GN=HIS2A PE=2 SV=1	AT1G08880.1	Histone H2A OS=Rosa chinensis OX=74649 GN=RchiOBHm_Chr6g0292281 PE=3 SV=1	574.667	581.625	442.187	1030.04	1684.4	1024.69
FvH4_2g24450	590.71	-1.03927	0.294133	-3.53334	0.000410348	0.00269042	-	-	TAS_SHIFL	Protein tas OS=Shigella flexneri OX=623 GN=tas PE=3 SV=1	AT1G04420.1	Putative NADP-dependent oxidoreductase domain-containing protein OS=Rosa chinensis OX=74649 GN=RchiOBHm_Chr6g0292291 PE=4 SV=1	621.665	511.361	756.751	218.236	408.917	293.061
FvH4_2g24611	1077.57	-2.27389	0.353373	-6.43482	1.2362e-10	3.03069e-09	-	-	-	-	-	Putative Rho GTPase activation protein OS=Rosa chinensis OX=74649 GN=RchiOBHm_Chr6g0292441 PE=4 SV=1	1732.55	1375.02	1660.9	236.108	346.415	403.728
FvH4_2g24630	63.8319	3.3455	0.820357	4.0781	4.54044e-05	0.000386565	-	-	-	-	-	Putative alpha/Beta hydrolase OS=Rosa chinensis OX=74649 GN=RchiOBHm_Chr6g0292461 PE=4 SV=1	21.3631	37.0835	26.9626	374.387	256.368	237.728
FvH4_2g24740	999.316	-1.75518	0.231113	-7.59447	3.09065e-14	1.25846e-12	gi|470108845|ref|XP_004290719.1|	PREDICTED: protease Do-like 2, chloroplastic isoform X2 [Fragaria vesca subsp. vesca]	DEGP2_ARATH	Protease Do-like 2, chloroplastic OS=Arabidopsis thaliana OX=3702 GN=DEGP2 PE=1 SV=2	AT2G47940.2	Putative peptidase Do OS=Rosa chinensis OX=74649 GN=RchiOBHm_Chr6g0292561 PE=4 SV=1	1481.53	1505.78	1577.31	473.158	530.745	348.395
FvH4_2g24750	353.341	-1.38203	0.444449	-3.10954	0.00187377	0.00974533	gi|525345107|ref|NP_001266995.1|	uncharacterized protein LOC101309411 [Fragaria vesca]	YUC10_ARATH	Probable indole-3-pyruvate monooxygenase YUCCA10 OS=Arabidopsis thaliana OX=3702 GN=YUC10 PE=2 SV=1	AT1G48910.1	YUC10 OS=Fragaria vesca OX=57918 GN=YUC10 PE=2 SV=1	509.509	879.268	903.248	333.938	357.008	188.543
FvH4_2g24890	25.1074	-6.19662	2.09445	-2.95859	0.00309046	0.0147337	gi|1366028957|ref|XP_024166898.1|	bidirectional sugar transporter SWEET14-like isoform X2 [Rosa chinensis]	-	-	-	Bidirectional sugar transporter SWEET OS=Rosa chinensis OX=74649 GN=RchiOBHm_Chr6g0292771 PE=3 SV=1	27.772	5.85528	7.19003	0	0	0
FvH4_2g24900	447.183	4.14531	0.553875	7.48419	7.19899e-14	2.81663e-12	gi|470148314|ref|XP_004309713.1|	PREDICTED: bidirectional sugar transporter SWEET9-like [Fragaria vesca subsp. vesca]	NEC1_PETHY	Bidirectional sugar transporter NEC1 OS=Petunia hybrida OX=4102 GN=NEC1 PE=2 SV=1	AT5G50790.1	Bidirectional sugar transporter SWEET OS=Rosa chinensis OX=74649 GN=RchiOBHm_Chr6g0292781 PE=3 SV=1	4.27261	9.75881	10.7851	255.863	80.5122	106.568
FvH4_2g24940	2440.5	-3.76998	0.344293	-10.9499	6.64996e-28	1.39014e-25	gi|470148310|ref|XP_004309711.1|	PREDICTED: glutaredoxin-C13 [Fragaria vesca subsp. vesca]	GRC13_ARATH	Glutaredoxin-C13 OS=Arabidopsis thaliana OX=3702 GN=GRXC13 PE=3 SV=1	AT2G47880.1	Putative thioredoxin-disulfide reductase OS=Rosa chinensis OX=74649 GN=RchiOBHm_Chr6g0292861 PE=4 SV=1	3019.67	3067.19	3522.22	223.88	184.331	296.135
FvH4_2g24941	710.945	-3.63324	0.320348	-11.3416	8.16817e-30	2.10155e-27	gi|470148259|ref|XP_004309686.1|	PREDICTED: glutaredoxin-C11 [Fragaria vesca subsp. vesca]	GRC11_ARATH	Glutaredoxin-C11 OS=Arabidopsis thaliana OX=3702 GN=GRXC11 PE=3 SV=1	AT3G62950.1	Putative thioredoxin-disulfide reductase OS=Rosa chinensis OX=74649 GN=RchiOBHm_Chr6g0292871 PE=4 SV=1	1512.51	1096.89	1251.96	85.6011	103.818	121.938
FvH4_2g24980	1288.21	1.98516	0.280909	7.06692	1.58408e-12	5.12975e-11	gi|470148253|ref|XP_004309683.1|	PREDICTED: BTB/POZ domain-containing protein At1g03010 isoform X1 [Fragaria vesca subsp. vesca]	Y1301_ARATH	BTB/POZ domain-containing protein At1g03010 OS=Arabidopsis thaliana OX=3702 GN=At1g03010 PE=2 SV=1	AT1G03010.1	Putative SKP1/BTB/POZ domain, NPH3 domain-containing protein OS=Rosa chinensis OX=74649 GN=RchiOBHm_Chr6g0292951 PE=3 SV=1	730.617	555.276	618.343	2287.71	1993.74	3256.47
FvH4_2g25000	1166.75	-1.92854	0.282243	-6.8329	8.32128e-12	2.43669e-10	gi|470148304|ref|XP_004309708.1|	PREDICTED: peptide chain release factor APG3, chloroplastic [Fragaria vesca subsp. vesca]	APG3_ARATH	Peptide chain release factor APG3, chloroplastic OS=Arabidopsis thaliana OX=3702 GN=APG3 PE=2 SV=1	-	Putative peptide chain release factor 1, double-stranded RNA-binding domain-containing protein OS=Rosa chinensis OX=74649 GN=RchiOBHm_Chr6g0292981 PE=3 SV=1	1709.05	1399.41	2167.8	389.438	564.645	432.419
FvH4_2g25220	130.741	-2.91869	0.398525	-7.32373	2.41173e-13	8.86434e-12	gi|470112853|ref|XP_004292644.1|	PREDICTED: glutathione S-transferase PARB-like isoform X2 [Fragaria vesca subsp. vesca]	GSTF1_TOBAC	Glutathione S-transferase PARB OS=Nicotiana tabacum OX=4097 GN=PARB PE=2 SV=1	AT1G02920.1	S-crystallin OS=Trema orientale OX=63057 GN=TorRG33x02_075860 PE=3 SV=1	120.701	177.61	143.801	15.0507	14.8312	28.6913
FvH4_2g25240	755.494	-1.17751	0.326283	-3.60885	0.000307555	0.00208356	gi|470108950|ref|XP_004290765.1|	PREDICTED: acidic proline-rich protein PRP33-like [Fragaria vesca subsp. vesca]	-	-	-	Putative heavy metal-associated domain, HMA OS=Rosa chinensis OX=74649 GN=RchiOBHm_Chr6g0293381 PE=4 SV=1	972.02	850.968	781.916	287.845	413.155	450.864
FvH4_2g25301	464.028	-1.24844	0.36337	-3.43572	0.000590975	0.00364983	gi|470108962|ref|XP_004290771.1|	PREDICTED: desiccation-related protein PCC13-62-like [Fragaria vesca subsp. vesca]	DRPE_CRAPL	Desiccation-related protein PCC13-62 OS=Craterostigma plantagineum OX=4153 PE=2 SV=1	AT3G62730.1	Uncharacterized protein OS=Rosa chinensis OX=74649 GN=RchiOBHm_Chr6g0258881 PE=4 SV=1	515.918	682.14	455.668	187.194	176.915	332
FvH4_2g25303	14.9216	-2.63547	0.810073	-3.25337	0.00114044	0.0064278	gi|764548326|ref|XP_011459794.1|	PREDICTED: desiccation-related protein PCC13-62-like [Fragaria vesca subsp. vesca]	DRPE_CRAPL	Desiccation-related protein PCC13-62 OS=Craterostigma plantagineum OX=4153 PE=2 SV=1	AT3G62730.1	Uncharacterized protein OS=Rosa chinensis OX=74649 GN=RchiOBHm_Chr6g0258881 PE=4 SV=1	37.3854	24.397	32.3552	3.76269	4.23749	7.17283
FvH4_2g25320	207.477	1.26888	0.314386	4.03605	5.43593e-05	0.000452601	gi|470108964|ref|XP_004290772.1|	PREDICTED: desiccation-related protein PCC13-62-like [Fragaria vesca subsp. vesca]	DRPE_CRAPL	Desiccation-related protein PCC13-62 OS=Craterostigma plantagineum OX=4153 PE=2 SV=1	AT3G62730.1	Uncharacterized protein OS=Rosa chinensis OX=74649 GN=RchiOBHm_Chr6g0252921 PE=4 SV=1	243.539	212.742	186.941	554.996	313.574	680.394
FvH4_2g25340	1296.82	-1.41655	0.295296	-4.79706	1.61009e-06	1.92503e-05	gi|470112861|ref|XP_004292648.1|	PREDICTED: protein LOW PSII ACCUMULATION 1, chloroplastic [Fragaria vesca subsp. vesca]	LPA1_ARATH	Protein LOW PSII ACCUMULATION 1, chloroplastic OS=Arabidopsis thaliana OX=3702 GN=LPA1 PE=1 SV=1	AT1G02910.1	Putative tetratricopeptide-like helical domain-containing protein OS=Rosa chinensis OX=74649 GN=RchiOBHm_Chr6g0293521 PE=4 SV=1	1798.77	1738.04	2007.82	585.098	953.434	538.987
FvH4_2g25450	274.493	3.71002	0.47081	7.88009	3.27135e-15	1.51668e-13	-	-	SRP_VITRI	Stress-related protein OS=Vitis riparia OX=96939 GN=SRP PE=2 SV=1	AT2G47780.1	Putative rubber elongation factor OS=Rosa chinensis OX=74649 GN=RchiOBHm_Chr6g0293681 PE=4 SV=1	68.3618	60.5046	95.2679	1034.74	1345.4	555.382
FvH4_2g25570	2956.6	1.52476	0.208968	7.29661	2.95105e-13	1.06955e-11	-	-	-	-	-	Putative xenobiotic-transporting ATPase OS=Rosa chinensis OX=74649 GN=RchiOBHm_Chr6g0293781 PE=4 SV=1	1456.96	1955.66	1801.1	6308.14	4288.34	4406.17
FvH4_2g25730	1210.91	-1.7435	0.303387	-5.74679	9.09519e-09	1.65846e-07	gi|1366029170|ref|XP_024167007.1|	caffeoylshikimate esterase-like [Rosa chinensis]	CSE_ARATH	Caffeoylshikimate esterase OS=Arabidopsis thaliana OX=3702 GN=CSE PE=1 SV=1	AT3G62860.1	Putative 2-acylglycerol O-acyltransferase OS=Rosa chinensis OX=74649 GN=RchiOBHm_Chr6g0294021 PE=4 SV=1	1733.61	1906.87	1606.07	461.87	483.073	621.987
FvH4_2g25790	25475	-1.57038	0.254944	-6.15972	7.28718e-10	1.57539e-08	-	-	-	-	-	Putative (6-4)DNA photolyase OS=Rosa chinensis OX=74649 GN=RchiOBHm_Chr6g0294101 PE=4 SV=1	21884.3	23658.3	24927.8	6755.9	7579.8	9393.33
FvH4_2g25960	257.426	2.93775	0.72767	4.03719	5.40948e-05	0.000450559	-	-	PME41_ARATH	Probable pectinesterase/pectinesterase inhibitor 41 OS=Arabidopsis thaliana OX=3702 GN=PME41 PE=2 SV=2	AT4G02330.1	Pectinesterase OS=Rosa chinensis OX=74649 GN=RchiOBHm_Chr6g0294321 PE=3 SV=1	162.359	216.645	80.8879	1770.34	1008.52	743.925
FvH4_2g25980	828.841	-1.40199	0.361623	-3.87695	0.000105776	0.000819148	-	-	PME40_ARATH	Probable pectinesterase/pectinesterase inhibitor 40 OS=Arabidopsis thaliana OX=3702 GN=PME40 PE=2 SV=1	AT4G02320.1	Pectinesterase OS=Rosa chinensis OX=74649 GN=RchiOBHm_Chr6g0294341 PE=3 SV=1	775.48	765.09	625.533	184.372	190.687	444.716
FvH4_2g26150	73.5565	-2.00556	0.65077	-3.08182	0.00205736	0.0105495	-	-	-	-	-	Putative galacturan 1,4-alpha-galacturonidase OS=Rosa chinensis OX=74649 GN=RchiOBHm_Chr6g0294531 PE=3 SV=1	25.6357	46.8423	16.1776	7.52537	4.23749	10.2469
FvH4_2g26162	262.071	2.34546	0.566139	4.14291	3.42932e-05	0.000304247	-	-	-	-	-	Uncharacterized protein OS=Manihot esculenta OX=3983 GN=MANES_02G158900 PE=4 SV=1	83.316	163.948	88.0779	602.03	620.792	481.604
FvH4_2g26180	5405.3	-2.12831	0.274278	-7.7597	8.51288e-15	3.73944e-13	gi|470109074|ref|XP_004290827.1|	PREDICTED: 30S ribosomal protein S13, chloroplastic-like [Fragaria vesca subsp. vesca]	RR13_ARATH	30S ribosomal protein S13, chloroplastic OS=Arabidopsis thaliana OX=3702 GN=RPS13 PE=2 SV=1	AT5G14320.1	Putative ribosomal protein S13 OS=Rosa chinensis OX=74649 GN=RchiOBHm_Chr6g0294611 PE=3 SV=1	6590.51	6236.85	8877.89	1429.82	2192.9	1342.34
FvH4_2g26231	866.479	1.95968	0.724713	2.70407	0.00684956	0.028231	gi|470109078|ref|XP_004290829.1|	PREDICTED: profilin-3 [Fragaria vesca subsp. vesca]	-	-	-	Profilin OS=Rosa chinensis OX=74649 GN=RchiOBHm_Chr6g0294811 PE=3 SV=1	194.404	263.488	309.171	502.318	2133.57	348.395
FvH4_2g26420	1075.72	-1.33604	0.345663	-3.86516	0.000111014	0.00085387	gi|470112928|ref|XP_004292681.1|	PREDICTED: glycine-rich protein 2-like [Fragaria vesca subsp. vesca]	CSP1_ARATH	Cold shock protein 1 OS=Arabidopsis thaliana OX=3702 GN=CSP1 PE=1 SV=1	AT4G36020.2	Putative transcription factor interactor and regulator CCHC(Zn) family OS=Rosa chinensis OX=74649 GN=RchiOBHm_Chr6g0295081 PE=4 SV=1	1213.42	1006.13	1283.42	449.641	480.955	457.012
FvH4_2g26480	90.3144	-2.32879	0.545658	-4.26787	1.9735e-05	0.000185938	gi|764536183|ref|XP_011458773.1|	PREDICTED: LOW QUALITY PROTEIN: flavonol synthase/flavanone 3-hydroxylase-like [Fragaria vesca subsp. vesca]	FLS_CITUN	Flavonol synthase/flavanone 3-hydroxylase OS=Citrus unshiu OX=55188 GN=FLS PE=1 SV=1	-	Uncharacterized protein OS=Prunus persica OX=3760 GN=PRUPE_1G502500 PE=3 SV=1	84.3841	61.4805	55.7228	16.9321	16.9499	6.14814
FvH4_2g26620	416.591	5.51903	1.81452	3.04159	0.00235331	0.0117756	gi|470112938|ref|XP_004292686.1|	PREDICTED: peroxidase 3-like [Fragaria vesca subsp. vesca]	-	-	-	Peroxidase OS=Rosa chinensis OX=74649 GN=RchiOBHm_Chr6g0295471 PE=3 SV=1	51.2714	74.1669	32.3552	4532.15	2590.16	112.716
FvH4_2g26630	236.973	2.52666	0.51591	4.89748	9.70746e-07	1.2154e-05	gi|470109116|ref|XP_004290848.1|	PREDICTED: ethylene-responsive transcription factor ERF014 [Fragaria vesca subsp. vesca]	-	-	-	Putative transcription factor AP2-EREBP family OS=Rosa chinensis OX=74649 GN=RchiOBHm_Chr6g0295481 PE=4 SV=1	79.0434	40.987	84.4829	489.149	302.98	386.308
FvH4_2g26691	1904.99	-1.43382	0.439809	-3.26009	0.00111376	0.00629257	gi|470109125|ref|XP_004290852.1|	PREDICTED: WAT1-related protein At4g08300-like [Fragaria vesca subsp. vesca]	WTR32_ARATH	WAT1-related protein At4g08300 OS=Arabidopsis thaliana OX=3702 GN=At4g08300 PE=2 SV=1	AT4G08300.1	WAT1-related protein OS=Rosa chinensis OX=74649 GN=RchiOBHm_Chr6g0295541 PE=3 SV=1	5881.25	4327.05	3706.46	1986.7	1483.12	1680.49
FvH4_2g26700	263.886	-5.02785	0.964085	-5.21515	1.8367e-07	2.63821e-06	gi|470109127|ref|XP_004290853.1|	PREDICTED: WAT1-related protein At1g21890-like [Fragaria vesca subsp. vesca]	WTR5_ARATH	WAT1-related protein At1g21890 OS=Arabidopsis thaliana OX=3702 GN=At1g21890 PE=2 SV=1	AT1G21890.1	WAT1-related protein OS=Rosa chinensis OX=74649 GN=RchiOBHm_Chr6g0295571 PE=3 SV=1	717.799	491.844	348.717	18.8134	6.35623	22.5432
FvH4_2g26710	1335.4	-1.0536	0.303056	-3.47657	0.000507873	0.00323384	gi|470109129|ref|XP_004290854.1|	PREDICTED: putative glutathione-specific gamma-glutamylcyclotransferase 2 [Fragaria vesca subsp. vesca]	GCT23_ARATH	Gamma-glutamylcyclotransferase 2-3 OS=Arabidopsis thaliana OX=3702 GN=GGCT2;3 PE=1 SV=1	AT1G44790.1	Gamma-glutamylcyclotransferase OS=Rosa chinensis OX=74649 GN=RchiOBHm_Chr6g0295581 PE=3 SV=1	1258.29	1352.57	1801.1	638.716	1050.9	436.518
FvH4_2g26780	150.3	-3.84207	0.623273	-6.16435	7.07739e-10	1.53145e-08	gi|764536385|ref|XP_004290860.2|	PREDICTED: heavy metal-associated isoprenylated plant protein 26 [Fragaria vesca subsp. vesca]	HIP45_ARATH	Heavy metal-associated isoprenylated plant protein 45 OS=Arabidopsis thaliana OX=3702 GN=HIPP45 PE=3 SV=1	AT3G56891.1	Putative heavy metal-associated domain, HMA OS=Rosa chinensis OX=74649 GN=RchiOBHm_Chr3g0495281 PE=4 SV=1	224.312	128.816	384.667	3.76269	25.4249	22.5432
FvH4_2g26810	316.225	1.19814	0.401964	2.98072	0.00287575	0.0138853	gi|470109147|ref|XP_004290863.1|	PREDICTED: uncharacterized protein LOC101304345 [Fragaria vesca subsp. vesca]	-	-	AT1G48200.1	Uncharacterized protein OS=Rosa chinensis OX=74649 GN=RchiOBHm_Chr6g0295671 PE=4 SV=1	228.585	263.488	203.118	451.522	721.432	422.172
FvH4_2g26870	3580.83	-1.14575	0.243158	-4.71195	2.45352e-06	2.84659e-05	-	-	PMI1_ARATH	Protein PLASTid MOVEMENT IMPAIRED 1 OS=Arabidopsis thaliana OX=3702 GN=PMI1 PE=1 SV=1	AT1G42550.1	Putative EEIG1/EHBP1 domain-containing protein OS=Rosa chinensis OX=74649 GN=RchiOBHm_Chr6g0295721 PE=4 SV=1	3324.09	4020.63	4580.05	2029.97	1199.21	2160.05
FvH4_2g26970	26035.3	-1.89201	0.3486	-5.42746	5.71604e-08	9.0121e-07	-	-	-	-	-	Putative chlorophyll A-B binding protein OS=Rosa chinensis OX=74649 GN=RchiOBHm_Chr6g0295831 PE=4 SV=1	43316.8	35487.9	45553.4	10767.9	10146.7	12591.4
FvH4_2g26990	1073.79	1.01599	0.186475	5.44842	5.0819e-08	8.09405e-07	-	-	-	-	-	Putative TRAM/LAG1/CLN8 domain-containing protein OS=Rosa chinensis OX=74649 GN=RchiOBHm_Chr6g0295871 PE=4 SV=1	961.338	913.424	778.321	1934.02	1783.98	1645.65
FvH4_2g27000	4134.14	-1.20346	0.232552	-5.17499	2.27927e-07	3.22639e-06	-	-	-	-	-	Putative chlorophyllide a oxygenase OS=Rosa chinensis OX=74649 GN=RchiOBHm_Chr6g0295881 PE=4 SV=1	5676.17	5117.52	6199.61	2714.78	2465.16	2198.98
FvH4_2g27070	172.703	1.34016	0.509249	2.63163	0.00849752	0.0336355	-	-	-	-	-	NBS20 OS=Fragaria ananassa OX=3747 PE=2 SV=1	155.95	210.79	129.421	450.582	311.455	493.901
FvH4_2g27170	2320.32	-1.55924	0.169614	-9.1929	3.8238e-20	3.23201e-18	gi|470112980|ref|XP_004292706.1|	PREDICTED: delta-aminolevulinic acid dehydratase, chloroplastic [Fragaria vesca subsp. vesca]	HEM21_ARATH	Delta-aminolevulinic acid dehydratase 1, chloroplastic OS=Arabidopsis thaliana OX=3702 GN=HEMB1 PE=2 SV=1	AT1G69740.3	Delta-aminolevulinic acid dehydratase OS=Rosa chinensis OX=74649 GN=RchiOBHm_Chr6g0296081 PE=3 SV=1	3780.2	2939.35	3211.25	1016.87	1204.51	1148.68
FvH4_2g27180	1594.38	-2.32367	0.207612	-11.1924	4.44348e-29	1.06158e-26	gi|470109181|ref|XP_004290880.1|	PREDICTED: two-component response regulator ARR8-like [Fragaria vesca subsp. vesca]	ORR9_ORYSJ	Two-component response regulator ORR9 OS=Oryza sativa subsp. japonica OX=39947 GN=RR9 PE=2 SV=2	AT3G57040.2	Putative response regulator and transcription factor RR-A-type family OS=Rosa chinensis OX=74649 GN=RchiOBHm_Chr6g0296091 PE=4 SV=1	2387.32	2037.64	2356.53	396.963	468.242	489.802
FvH4_2g27293	129.928	1.18341	0.310816	3.80742	0.000140423	0.00104838	-	-	-	-	-	Putative RNA-directed DNA polymerase OS=Rosa chinensis OX=74649 GN=RchiOBHm_Chr5g0041201 PE=4 SV=1	38.4535	40.987	57.5203	82.7791	131.362	98.3703
FvH4_2g27370	192.595	-3.245	0.506044	-6.41248	1.43167e-10	3.46635e-09	-	-	Y4117_ARATH	Putative disease resistance protein At4g11170 OS=Arabidopsis thaliana OX=3702 GN=At4g11170 PE=2 SV=1	AT5G17680.2	Putative TIR domain, winged helix-turn-helix DNA-binding domain-containing protein OS=Rosa chinensis OX=74649 GN=RchiOBHm_Chr6g0296221 PE=4 SV=1	314.037	261.536	501.505	71.491	21.1874	20.4938
FvH4_2g27430	2251.81	1.34121	0.294126	4.55998	5.11584e-06	5.55295e-05	-	-	-	-	-	ATAF1 protein OS=Rosa hybrid cultivar OX=128735 GN=ATAF1 PE=2 SV=1	1339.46	1569.22	1513.5	3959.29	4972.69	2272.76
FvH4_2g27450	126.697	1.19559	0.462751	2.58366	0.00977586	0.0377784	-	-	-	-	-	Putative transcription factor C2H2 family OS=Rosa chinensis OX=74649 GN=RchiOBHm_Chr6g0296291 PE=4 SV=1	178.382	87.8292	149.193	317.006	340.058	294.086
FvH4_2g27470	331.932	1.85895	0.38872	4.78222	1.73369e-06	2.05628e-05	-	-	-	-	-	Beta-galactosidase OS=Fragaria ananassa OX=3747 PE=2 SV=1	271.311	275.198	341.527	1565.28	1076.32	579.975
FvH4_2g27700	182.771	1.41325	0.39762	3.55428	0.000379012	0.00251311	gi|470113001|ref|XP_004292716.1|	PREDICTED: probable receptor-like protein kinase At1g11050 [Fragaria vesca subsp. vesca]	Y1105_ARATH	Probable receptor-like protein kinase At1g11050 OS=Arabidopsis thaliana OX=3702 GN=At1g11050 PE=2 SV=1	AT1G11050.1	Uncharacterized protein OS=Rosa chinensis OX=74649 GN=RchiOBHm_Chr6g0296571 PE=4 SV=1	96.1338	109.299	80.8879	270.913	298.743	192.642
FvH4_2g27760	407.305	4.32113	0.634702	6.80814	9.88712e-12	2.86494e-10	gi|470109246|ref|XP_004290911.1|	PREDICTED: amino-acid permease BAT1 homolog [Fragaria vesca subsp. vesca]	BAT1_ORYSJ	Amino-acid permease BAT1 homolog OS=Oryza sativa subsp. japonica OX=39947 GN=BAT1 PE=2 SV=1	AT2G01170.1	Putative amino acid/polyamine transporter I OS=Rosa chinensis OX=74649 GN=RchiOBHm_Chr6g0296631 PE=4 SV=1	38.4535	139.551	127.623	2257.61	2436.55	1420.22
FvH4_2g27770	173.198	5.75917	1.15783	4.97409	6.55551e-07	8.45943e-06	gi|470113009|ref|XP_004292720.1|	PREDICTED: amino-acid permease BAT1 homolog [Fragaria vesca subsp. vesca]	BAT1_ORYSJ	Amino-acid permease BAT1 homolog OS=Oryza sativa subsp. japonica OX=39947 GN=BAT1 PE=2 SV=1	AT2G01170.1	Putative amino acid/polyamine transporter I OS=Rosa chinensis OX=74649 GN=RchiOBHm_Chr6g0296641 PE=4 SV=1	12.8178	33.1799	8.98754	1089.3	1207.68	680.394
FvH4_2g27850	1118.64	-1.30124	0.184818	-7.04064	1.91363e-12	6.07923e-11	gi|470113021|ref|XP_004292726.1|	PREDICTED: uncharacterized protein LOC101309799 isoform X1 [Fragaria vesca subsp. vesca]	-	-	AT1G21600.2	Uncharacterized protein OS=Rosa chinensis OX=74649 GN=RchiOBHm_Chr6g0296711 PE=4 SV=1	1702.64	1454.06	1484.74	565.343	639.86	678.345
FvH4_2g27860	30.7531	-2.58473	0.882454	-2.92903	0.00340023	0.0159188	gi|470109254|ref|XP_004290915.1|	PREDICTED: floral homeotic protein PMADS 2-like [Fragaria vesca subsp. vesca]	MADS2_PETHY	Floral homeotic protein PMADS 2 OS=Petunia hybrida OX=4102 GN=PMADS2 PE=2 SV=1	AT5G20240.1	Putative transcription factor MADS-MIKC family OS=Rosa chinensis OX=74649 GN=RchiOBHm_Chr6g0296721 PE=4 SV=1	68.3618	48.794	55.7228	5.64403	23.3062	0
FvH4_2g28010	334.655	-1.2026	0.44578	-2.69775	0.00698089	0.0286592	gi|470113033|ref|XP_004292732.1|	PREDICTED: probable calcium-binding protein CML44 isoform X1 [Fragaria vesca subsp. vesca]	-	-	-	Putative EF-hand domain pair protein OS=Rosa chinensis OX=74649 GN=RchiOBHm_Chr6g0296871 PE=4 SV=1	610.984	630.419	792.701	408.251	215.052	260.271
FvH4_2g28120	11.3911	3.47938	1.40482	2.47675	0.0132585	0.0484201	gi|1358152184|gb|PRQ26663.1|	hypothetical protein RchiOBHm_Chr6g0297041 [Rosa chinensis]	-	-	-	Uncharacterized protein OS=Rosa chinensis OX=74649 GN=RchiOBHm_Chr6g0297041 PE=4 SV=1	3.20446	1.95176	3.59502	37.6269	18.0093	42.0123
FvH4_2g28160	54.5859	6.04655	0.863083	7.00576	2.45644e-12	7.68885e-11	gi|1358152183|gb|PRQ26662.1|	hypothetical protein RchiOBHm_Chr6g0297031 [Rosa chinensis]	-	-	-	Uncharacterized protein OS=Rosa chinensis OX=74649 GN=RchiOBHm_Chr6g0297031 PE=4 SV=1	4.27261	3.90352	3.59502	308.54	147.253	320.728
FvH4_2g28211	5.95316	7.4111	2.58265	2.86957	0.00411024	0.0185922	-	-	-	-	-	-	0	0	0	15.0507	31.7811	45.0864
FvH4_2g28600	1243.77	1.12847	0.241203	4.67853	2.88941e-06	3.29678e-05	-	-	-	-	-	Putative 43kDa postsynaptic protein OS=Rosa chinensis OX=74649 GN=RchiOBHm_Chr6g0297371 PE=4 SV=1	817.138	1254.01	1065.02	2792.85	1727.84	2336.29
FvH4_2g28691	9.05572	6.34716	2.21148	2.8701	0.00410348	0.0185687	-	-	-	-	-	-	0	0	0	0	29.6624	14.3457
FvH4_2g28740	341.389	-1.52805	0.499651	-3.05824	0.00222644	0.0112514	-	-	-	-	-	Hexosyltransferase OS=Rosa chinensis OX=74649 GN=RchiOBHm_Chr6g0297521 PE=3 SV=1	285.197	335.703	461.061	126.05	98.5216	150.629
FvH4_2g28840	20.7735	3.10992	1.07572	2.89102	0.00383992	0.0175834	gi|470113534|ref|XP_004292978.1|	PREDICTED: ACT domain-containing protein ACR2 [Fragaria vesca subsp. vesca]	ACR2_ARATH	ACT domain-containing protein ACR2 OS=Arabidopsis thaliana OX=3702 GN=ACR2 PE=4 SV=1	AT5G25320.1	Putative [Protein-PII] uridylyltransferase OS=Rosa chinensis OX=74649 GN=RchiOBHm_Chr6g0297601 PE=4 SV=1	0	9.75881	5.39253	28.2201	31.7811	71.7283
FvH4_2g28900	2336.16	3.56959	0.427995	8.34026	7.41254e-17	4.15191e-15	-	-	-	-	-	Uncharacterized protein OS=Ficedula albicollis OX=59894 PE=4 SV=1	690.027	837.305	920.324	12190.2	3370.92	13501.3
FvH4_2g28920	10535.3	-2.60685	0.342251	-7.61679	2.60056e-14	1.07195e-12	-	-	14KD_DAUCA	14 kDa proline-rich protein DC2.15 OS=Daucus carota OX=4039 PE=2 SV=1	AT2G45180.1	Putative bifunctional inhibitor/plant lipid transfer protein/seed storage helical OS=Rosa chinensis OX=74649 GN=RchiOBHm_Chr6g0297741 PE=4 SV=1	12191.9	13080.7	17306.4	1804.21	1332.69	3852.83
FvH4_2g28940	2040.95	-1.45511	0.210182	-6.92311	4.41819e-12	1.33994e-10	-	-	APT5_ARATH	Adenine phosphoribosyltransferase 5 OS=Arabidopsis thaliana OX=3702 GN=APT5 PE=1 SV=1	AT5G11160.1	Putative adenine phosphoribosyltransferase OS=Rosa chinensis OX=74649 GN=RchiOBHm_Chr6g0297761 PE=3 SV=1	1291.4	1475.53	1290.61	348.048	646.217	486.728
FvH4_2g28951	13096.5	-1.1491	0.243888	-4.7116	2.45783e-06	2.85018e-05	-	-	ATPX_SPIOL	ATP synthase subunit b', chloroplastic OS=Spinacia oleracea OX=3562 GN=ATPG PE=1 SV=2	AT4G32260.1	Putative ATP synthase, F0 complex, subunit B/B' protein OS=Rosa chinensis OX=74649 GN=RchiOBHm_Chr6g0297791 PE=3 SV=1	19173.4	14177.6	19913.7	7629.78	6970.67	9416.9
FvH4_2g28970	821.232	2.0691	0.335978	6.15846	7.34576e-10	1.58659e-08	-	-	IAA29_ARATH	Auxin-responsive protein IAA29 OS=Arabidopsis thaliana OX=3702 GN=IAA29 PE=1 SV=2	-	Auxin-responsive protein OS=Rosa chinensis OX=74649 GN=RchiOBHm_Chr6g0297821 PE=3 SV=1	521.259	306.426	577.899	1871.94	1835.89	2190.79
FvH4_2g29080	596.001	-1.29295	0.2642	-4.89382	9.88974e-07	1.23701e-05	-	-	-	-	-	Putative L-ascorbate peroxidase OS=Rosa chinensis OX=74649 GN=RchiOBHm_Chr6g0297961 PE=3 SV=1	828.887	749.476	934.704	253.981	495.786	276.666
FvH4_2g29150	170.866	-2.38067	0.46294	-5.1425	2.71108e-07	3.78953e-06	-	-	-	-	-	Putative transcription factor AP2-EREBP family OS=Rosa chinensis OX=74649 GN=RchiOBHm_Chr6g0298011 PE=4 SV=1	155.95	245.922	244.461	37.6269	10.5937	75.8271
FvH4_2g29200	783.701	-1.42304	0.329164	-4.3232	1.53785e-05	0.000149216	-	-	-	-	-	Putative Heat shock protein DnaJ, cysteine-rich OS=Rosa chinensis OX=74649 GN=RchiOBHm_Chr6g0298061 PE=4 SV=1	878.022	884.148	1211.52	255.863	538.161	315.605
FvH4_2g29300	1356.97	-1.47664	0.296216	-4.98503	6.19531e-07	8.0539e-06	gi|470110382|ref|XP_004291463.1|	PREDICTED: probable sugar phosphate/phosphate translocator At5g25400 [Fragaria vesca subsp. vesca]	PT525_ARATH	Probable sugar phosphate/phosphate translocator At5g25400 OS=Arabidopsis thaliana OX=3702 GN=At5g25400 PE=2 SV=1	AT5G25400.1	Putative sugar phosphate transporter domain-containing protein OS=Rosa chinensis OX=74649 GN=RchiOBHm_Chr6g0298121 PE=4 SV=1	756.253	772.897	695.636	323.591	184.331	291.012
FvH4_2g29360	263.259	1.14612	0.41428	2.76654	0.00566548	0.0241614	gi|764542135|ref|XP_011459193.1|	PREDICTED: lactation elevated protein 1 [Fragaria vesca subsp. vesca]	AFG1L_MOUSE	AFG1-like ATPase OS=Mus musculus OX=10090 GN=Afg1l PE=1 SV=1	AT2G25530.1	Putative ATPase, AFG1, P-loop containing nucleoside triphosphate hydrolase OS=Rosa chinensis OX=74649 GN=RchiOBHm_Chr6g0298181 PE=4 SV=1	183.722	292.764	307.374	564.403	593.248	577.925
FvH4_2g29590	12.121	-4.6224	1.55448	-2.9736	0.00294324	0.0141557	gi|470113593|ref|XP_004293007.1|	PREDICTED: ammonium transporter 3 member 1-like [Fragaria vesca subsp. vesca]	-	-	-	Ammonium transporter OS=Rosa chinensis OX=74649 GN=RchiOBHm_Chr6g0298571 PE=3 SV=1	6.40892	11.7106	32.3552	0	2.11874	0
FvH4_2g29620	126.057	-1.88998	0.353956	-5.3396	9.31536e-08	1.41165e-06	gi|764542299|ref|XP_011459210.1|	PREDICTED: cysteine-rich receptor-like protein kinase 2 [Fragaria vesca subsp. vesca]	-	-	-	Uncharacterized protein OS=Rosa chinensis OX=74649 GN=RchiOBHm_Chr3g0487811 PE=4 SV=1	170.905	175.658	208.511	39.5082	59.3248	51.2345
FvH4_2g29680	28209.5	1.6283	0.225696	7.21457	5.41044e-13	1.89067e-11	gi|470110423|ref|XP_004291483.1|	PREDICTED: uncharacterized protein LOC101294330 [Fragaria vesca subsp. vesca]	-	-	-	Putative Galactose-binding domain-containing protein OS=Rosa chinensis OX=74649 GN=RchiOBHm_Chr6g0298661 PE=4 SV=1	20848.2	21119	21566.5	73774	49435.6	73203.9
FvH4_2g29710	61.4276	2.21799	0.711841	3.11585	0.00183418	0.00957923	gi|470110417|ref|XP_004291480.1|	PREDICTED: probable boron transporter 7 [Fragaria vesca subsp. vesca]	BOR4_ARATH	Boron transporter 4 OS=Arabidopsis thaliana OX=3702 GN=BOR4 PE=2 SV=1	AT1G15460.2	Putative bicarbonate transporter OS=Rosa chinensis OX=74649 GN=RchiOBHm_Chr6g0298721 PE=4 SV=1	25.6357	35.1317	8.98754	64.9063	118.65	140.383
FvH4_2g29730	73.4867	2.5172	0.835667	3.0122	0.00259358	0.0127329	gi|470110439|ref|XP_004291491.1|	PREDICTED: EG45-like domain containing protein [Fragaria vesca subsp. vesca]	EGC_CITJA	EG45-like domain containing protein OS=Citrus jambhiri OX=64884 GN=CjBAp12 PE=1 SV=1	AT4G30380.2	Putative rlpA-like protein, double-psi beta-barrel OS=Rosa chinensis OX=74649 GN=RchiOBHm_Chr6g0298751 PE=4 SV=1	65.1574	40.987	21.5701	212.592	222.468	295.111
FvH4_2g29750	333.16	-1.84096	0.445869	-4.12893	3.64459e-05	0.000320191	gi|764542390|ref|XP_011459220.1|	PREDICTED: 3-ketoacyl-CoA synthase 11-like [Fragaria vesca subsp. vesca]	KCS11_ARATH	3-ketoacyl-CoA synthase 11 OS=Arabidopsis thaliana OX=3702 GN=KCS11 PE=1 SV=1	AT2G26640.1	3-ketoacyl-CoA synthase OS=Rosa chinensis OX=74649 GN=RchiOBHm_Chr6g0298771 PE=3 SV=1	294.81	296.668	251.651	114.762	40.2561	79.9258
FvH4_2g29861	757.766	-2.55094	0.854552	-2.98512	0.00283468	0.0137125	-	-	CRK29_ARATH	Cysteine-rich receptor-like protein kinase 29 OS=Arabidopsis thaliana OX=3702 GN=CRK29 PE=2 SV=1	AT4G21410.3	Uncharacterized protein OS=Rosa chinensis OX=74649 GN=RchiOBHm_Chr6g0299011 PE=4 SV=1	816.069	1116.41	1256.46	146.745	184.331	213.136
FvH4_2g29870	329.041	1.91683	0.587953	3.26018	0.0011134	0.00629205	-	-	CRK29_ARATH	Cysteine-rich receptor-like protein kinase 29 OS=Arabidopsis thaliana OX=3702 GN=CRK29 PE=2 SV=1	AT4G21410.3	Uncharacterized protein OS=Rosa chinensis OX=74649 GN=RchiOBHm_Chr6g0299011 PE=4 SV=1	153.814	279.102	167.168	948.197	1002.17	315.605
FvH4_2g29980	200.231	-2.69038	0.492797	-5.45942	4.77697e-08	7.64479e-07	-	-	-	-	-	Putative oxoglutarate/iron-dependent dioxygenase, non-heme dioxygenase domain-containing protein OS=Rosa chinensis OX=74649 GN=RchiOBHm_Chr1g0342061 PE=3 SV=1	396.285	464.519	514.087	101.592	80.5122	30.7407
FvH4_2g29991	1335.57	1.14219	0.298015	3.83267	0.000126762	0.000960788	-	-	-	-	-	Putative 2-oxoglutarate-dependent dioxygenase AOP1 OS=Prunus yedoensis var. nudiflora OX=2094558 GN=Pyn_19616 PE=3 SV=1	903.658	1120.31	1346.33	2327.22	2491.64	2621.16
FvH4_2g30170	1560.99	-2.48582	0.241408	-10.2972	7.2564e-25	1.05639e-22	gi|470110285|ref|XP_004291415.1|	PREDICTED: psbP domain-containing protein 5, chloroplastic [Fragaria vesca subsp. vesca]	PPD5_ARATH	PsbP domain-containing protein 5, chloroplastic OS=Arabidopsis thaliana OX=3702 GN=PPD5 PE=1 SV=3	AT5G11450.1	Putative photosystem II OS=Rosa chinensis OX=74649 GN=RchiOBHm_Chr6g0312741 PE=4 SV=1	2845.56	2051.3	2647.73	391.319	396.205	559.481
FvH4_2g30381	249.35	1.49741	0.306353	4.88787	1.01932e-06	1.26741e-05	-	-	-	-	-	-	324.719	206.887	168.966	667.877	567.823	739.826
FvH4_2g30510	6.86978	7.38805	2.21433	3.33647	0.00084849	0.00497638	-	-	-	-	-	Amine oxidase OS=Rosa chinensis OX=74649 GN=RchiOBHm_Chr4g0416501 PE=3 SV=1	0	0	0	20.6948	65.681	4.09876
FvH4_2g30520	1192.07	-1.23255	0.281894	-4.3724	1.22891e-05	0.000122906	-	-	-	-	-	Putative exosome complex component Rrp41, PNPase/RNase PH domain-containing protein OS=Rosa chinensis OX=74649 GN=RchiOBHm_Chr4g0416511 PE=4 SV=1	1659.91	1245.22	1748.08	618.962	901.525	460.086
FvH4_2g30640	724.773	-1.90965	0.310529	-6.14968	7.76403e-10	1.67076e-08	gi|764607495|ref|XP_004303443.2|	PREDICTED: uncharacterized protein LOC101294383 [Fragaria vesca subsp. vesca]	GG2_ORYSJ	Guanine nucleotide-binding protein subunit gamma 2 OS=Oryza sativa subsp. japonica OX=39947 GN=RGG2 PE=1 SV=1	AT3G63420.2	Putative G-protein gamma OS=Rosa chinensis OX=74649 GN=RchiOBHm_Chr6g0312271 PE=4 SV=1	1241.19	895.858	1118.05	212.592	389.849	264.37
FvH4_2g30680	10920.1	-2.39464	0.253892	-9.43175	4.03297e-21	3.83837e-19	gi|764607519|ref|XP_011467213.1|	PREDICTED: probable plastid-lipid-associated protein 8, chloroplastic [Fragaria vesca subsp. vesca]	PAP8_ARATH	Probable plastid-lipid-associated protein 8, chloroplastic OS=Arabidopsis thaliana OX=3702 GN=PAP8 PE=1 SV=1	AT5G19940.2	Putative plastid lipid-associated protein/fibrillin OS=Rosa chinensis OX=74649 GN=RchiOBHm_Chr6g0312201 PE=4 SV=1	18310.3	15006.1	16922.6	2951.83	3385.75	3216.5
FvH4_2g30710	1129.14	-1.00818	0.22565	-4.46789	7.89958e-06	8.2679e-05	gi|470135286|ref|XP_004303448.1|	PREDICTED: selenoprotein H [Fragaria vesca subsp. vesca]	-	-	AT4G31360.1	Uncharacterized protein OS=Rosa chinensis OX=74649 GN=RchiOBHm_Chr6g0312181 PE=4 SV=1	1679.14	1288.16	1644.72	684.809	997.928	610.715
FvH4_2g30860	1668.55	1.18751	0.146546	8.10333	5.3475e-16	2.68097e-14	gi|470135298|ref|XP_004303454.1|	PREDICTED: guanine nucleotide-binding protein alpha-1 subunit isoform X1 [Fragaria vesca subsp. vesca]	-	-	-	Putative guanine nucleotide binding protein (G-protein), alpha subunit OS=Rosa chinensis OX=74649 GN=RchiOBHm_Chr6g0311991 PE=4 SV=1	1341.6	1342.81	1549.45	2756.17	3620.93	3268.76
FvH4_2g30870	500.092	1.12691	0.237997	4.73495	2.19104e-06	2.56366e-05	gi|764607572|ref|XP_011467221.1|	PREDICTED: fatty-acid-binding protein 2 [Fragaria vesca subsp. vesca]	-	-	-	Putative chalcone isomerase OS=Rosa chinensis OX=74649 GN=RchiOBHm_Chr6g0311981 PE=4 SV=1	217.903	210.79	251.651	536.183	540.28	409.876
FvH4_2g30890	1744.98	-2.3291	0.323425	-7.20136	5.96159e-13	2.08016e-11	gi|470135304|ref|XP_004303457.1|	PREDICTED: uncharacterized protein LOC101298440 [Fragaria vesca subsp. vesca]	-	-	-	Uncharacterized protein OS=Rosa chinensis OX=74649 GN=RchiOBHm_Chr6g0311951 PE=4 SV=1	3764.17	2605.6	2524.6	491.03	572.061	707.036
FvH4_2g30910	7733.27	-3.31207	0.292609	-11.3191	1.05566e-29	2.65765e-27	gi|470135308|ref|XP_004303459.1|	PREDICTED: LRR receptor-like serine/threonine-protein kinase ERECTA [Fragaria vesca subsp. vesca]	-	-	-	Uncharacterized protein OS=Rosa chinensis OX=74649 GN=RchiOBHm_Chr6g0311931 PE=3 SV=1	11895	10449.7	9079.21	1068.6	644.098	1450.96
FvH4_2g30940	1245.67	-1.77818	0.205226	-8.66449	4.53538e-18	2.94963e-16	gi|470135312|ref|XP_004303461.1|	PREDICTED: uncharacterized protein LOC101299599 [Fragaria vesca subsp. vesca]	-	-	-	Uncharacterized protein OS=Rosa chinensis OX=74649 GN=RchiOBHm_Chr6g0311911 PE=4 SV=1	1906.65	1665.83	1958.39	677.283	399.383	534.888
FvH4_2g31050	300.515	-1.66429	0.410744	-4.05189	5.08064e-05	0.000426814	gi|764607628|ref|XP_011467225.1|	PREDICTED: trihelix transcription factor GT-2-like [Fragaria vesca subsp. vesca]	TGT2_ARATH	Trihelix transcription factor GT-2 OS=Arabidopsis thaliana OX=3702 GN=GT-2 PE=2 SV=1	AT1G76890.2	Putative transcription factor MYB family OS=Rosa chinensis OX=74649 GN=RchiOBHm_Chr6g0311751 PE=4 SV=1	384.535	495.747	571.608	141.101	105.937	211.086
FvH4_2g31070	777.028	-6.44743	1.40888	-4.57628	4.73321e-06	5.16878e-05	gi|470139754|ref|XP_004305611.1|	PREDICTED: transcription factor MYB82-like [Fragaria vesca subsp. vesca]	MYBC_MAIZE	Anthocyanin regulatory C1 protein OS=Zea mays OX=4577 GN=C1 PE=2 SV=1	AT1G22640.1	Putative transcription factor MYB-HB-like family OS=Rosa chinensis OX=74649 GN=RchiOBHm_Chr6g0311731 PE=4 SV=1	2.13631	13.6623	32.3552	0	0	0
FvH4_2g31100	137.291	2.02193	0.748767	2.70035	0.00692667	0.0284766	gi|470135326|ref|XP_004303468.1|	PREDICTED: transcription factor TT2-like [Fragaria vesca subsp. vesca]	TT2_ARATH	Transcription factor TT2 OS=Arabidopsis thaliana OX=3702 GN=TT2 PE=1 SV=1	AT5G35550.1	Transcription factor MYB9 OS=Fragaria ananassa OX=3747 PE=2 SV=1	12.8178	33.1799	57.5203	107.237	211.874	102.469
FvH4_2g31130	729.264	-2.6491	0.356404	-7.43286	1.06275e-13	4.09922e-12	gi|470135330|ref|XP_004303470.1|	PREDICTED: NAD(P)H-quinone oxidoreductase subunit U, chloroplastic [Fragaria vesca subsp. vesca]	NDHU_ARATH	NAD(P)H-quinone oxidoreductase subunit U, chloroplastic OS=Arabidopsis thaliana OX=3702 GN=ndhU PE=1 SV=1	AT5G21430.1	Putative DnaJ domain-containing protein OS=Rosa chinensis OX=74649 GN=RchiOBHm_Chr6g0311651 PE=4 SV=1	1354.42	1080.3	1430.82	159.914	204.459	252.074
FvH4_2g31190	50.2316	-7.79558	1.36655	-5.70456	1.16642e-08	2.09107e-07	-	-	MYBS3_ORYSJ	Transcription factor MYBS3 OS=Oryza sativa subsp. japonica OX=39947 GN=MYBS3 PE=2 SV=1	AT5G56840.1	Uncharacterized protein OS=Medicago truncatula OX=3880 PE=2 SV=1	66.2255	21.4694	35.9502	0	0	0
FvH4_2g31211	1391.8	-2.16084	0.226251	-9.55064	1.28892e-21	1.33529e-19	-	-	MSL10_ARATH	Mechanosensitive ion channel protein 10 OS=Arabidopsis thaliana OX=3702 GN=MSL10 PE=1 SV=1	AT5G12080.3	Mechanosensitive ion channel protein OS=Rosa chinensis OX=74649 GN=RchiOBHm_Chr6g0311581 PE=3 SV=1	1588.34	1620.94	2227.11	445.878	314.633	454.962
FvH4_2g31260	514.369	1.8993	0.24952	7.61182	2.70267e-14	1.10819e-12	-	-	BIG1A_ARATH	Protein BIG GRAIN 1-like A OS=Arabidopsis thaliana OX=3702 GN=At3g13980 PE=3 SV=1	AT3G13980.1	Uncharacterized protein OS=Rosa chinensis OX=74649 GN=RchiOBHm_Chr6g0311541 PE=4 SV=1	319.378	336.679	389.161	1284.02	1133.53	1482.73
FvH4_2g31280	253.459	1.15051	0.412694	2.7878	0.00530678	0.0229408	-	-	ALFL4_ORYSJ	PHD finger protein ALFIN-LIKE 4 OS=Oryza sativa subsp. japonica OX=39947 GN=Os04g0444900 PE=2 SV=2	AT5G20510.3	Uncharacterized protein OS=Citrus unshiu OX=55188 GN=CUMW_270230 PE=4 SV=1	23.4994	40.987	34.1527	99.7112	82.631	36.8888
FvH4_2g31400	45.4794	3.60541	0.844479	4.26939	1.96012e-05	0.000184901	-	-	-	-	-	Putative transcription factor WRKY family OS=Rosa chinensis OX=74649 GN=RchiOBHm_Chr6g0311421 PE=4 SV=1	8.54523	31.2282	3.59502	194.719	207.637	125.012
FvH4_2g31420	1617.96	-1.17335	0.262372	-4.47209	7.74603e-06	8.12171e-05	-	-	-	-	-	Putative (S)-coclaurine-N-methyltransferase OS=Rosa chinensis OX=74649 GN=RchiOBHm_Chr6g0311401 PE=4 SV=1	2549.68	1802.45	1952.09	754.418	738.382	1302.38
FvH4_2g31471	781.263	1.90902	0.309664	6.16482	7.05624e-10	1.52829e-08	-	-	-	-	-	Putative harbinger transposase-derived nuclease domain-containing protein OS=Rosa chinensis OX=74649 GN=RchiOBHm_Chr6g0311321 PE=4 SV=1	294.81	510.386	367.59	1568.1	1688.64	1148.68
FvH4_2g31570	95.4019	6.03699	1.11218	5.42807	5.6968e-08	8.98782e-07	gi|470109558|ref|XP_004291061.1|	PREDICTED: endochitinase PR4-like [Fragaria vesca subsp. vesca]	CHI5_ARATH	Endochitinase EP3 OS=Arabidopsis thaliana OX=3702 GN=EP3 PE=1 SV=1	AT3G54420.1	Class IV chitinase OS=Fragaria ananassa OX=3747 GN=CHI4-2 PE=2 SV=1	8.54523	9.75881	0	541.827	516.973	135.259
FvH4_2g31640	977.297	-1.93318	0.213194	-9.06767	1.21592e-19	9.81663e-18	-	-	IQM1_ARATH	IQ domain-containing protein IQM1 OS=Arabidopsis thaliana OX=3702 GN=IQM1 PE=1 SV=1	AT4G33050.3	Uncharacterized protein OS=Rosa chinensis OX=74649 GN=RchiOBHm_Chr6g0311181 PE=4 SV=1	1706.91	1740.97	1664.49	380.031	434.342	524.641
FvH4_2g31700	162.271	3.75741	0.698624	5.37829	7.51952e-08	1.15902e-06	-	-	GRXC6_ARATH	Glutaredoxin-C6 OS=Arabidopsis thaliana OX=3702 GN=GRXC6 PE=2 SV=2	AT4G33040.1	Putative glutathione dehydrogenase (Ascorbate) OS=Rosa chinensis OX=74649 GN=RchiOBHm_Chr6g0311131 PE=4 SV=1	34.1809	68.3116	32.3552	630.25	488.37	704.987
FvH4_2g31810	238.438	-1.06209	0.277494	-3.82741	0.000129497	0.000979297	-	-	-	-	-	Putative ceramidase OS=Rosa chinensis OX=74649 GN=RchiOBHm_Chr6g0311011 PE=4 SV=1	294.81	224.453	273.221	122.287	163.143	94.2715
FvH4_2g31940	25861.2	-1.11623	0.224077	-4.98146	6.31079e-07	8.19038e-06	-	-	-	-	-	Glycine cleavage system P protein OS=Rosa chinensis OX=74649 GN=RchiOBHm_Chr6g0310901 PE=3 SV=1	41105.8	38380.4	37050.2	18813.4	12459.3	22484.8
FvH4_2g31951	2167.32	-2.05812	0.369331	-5.57256	2.51016e-08	4.24632e-07	gi|470109504|ref|XP_004291037.1|	PREDICTED: uncharacterized protein ycf36 [Fragaria vesca subsp. vesca]	GLD27_ARATH	Protein CONSERVED IN THE GREEN LINEAGE AND DIATOMS 27, chloroplastic OS=Arabidopsis thaliana OX=3702 GN=CGLD27 PE=2 SV=1	AT5G11840.1	Uncharacterized protein OS=Rosa chinensis OX=74649 GN=RchiOBHm_Chr6g0310871 PE=4 SV=1	4014.12	2295.27	2441.92	658.47	819.954	623.012
FvH4_2g32060	1040.07	-1.59622	0.253449	-6.298	3.0151e-10	6.90054e-09	gi|764538115|ref|XP_004292788.2|	PREDICTED: uncharacterized protein LOC101305635 [Fragaria vesca subsp. vesca]	ATH1_ARATH	Homeobox protein ATH1 OS=Arabidopsis thaliana OX=3702 GN=ATH1 PE=1 SV=1	AT4G32980.2	Putative transcription factor Homobox-WOX family OS=Rosa chinensis OX=74649 GN=RchiOBHm_Chr6g0310681 PE=4 SV=1	892.977	805.101	543.746	265.269	192.806	282.814
FvH4_2g32080	1927.81	-1.40147	0.206363	-6.79131	1.11123e-11	3.1884e-10	gi|470109488|ref|XP_004291029.1|	PREDICTED: pollen-specific protein SF21-like [Fragaria vesca subsp. vesca]	NDL2_ARATH	Protein NDL2 OS=Arabidopsis thaliana OX=3702 GN=NDL2 PE=1 SV=1	AT5G11790.1	Putative alpha/Beta hydrolase OS=Rosa chinensis OX=74649 GN=RchiOBHm_Chr6g0310661 PE=4 SV=1	1958.99	2234.77	2521.01	703.622	962.969	876.11
FvH4_2g32440	176.443	2.17705	0.596521	3.64958	0.000262672	0.00181744	gi|470113135|ref|XP_004292782.1|	PREDICTED: transcription factor RAX3-like [Fragaria vesca subsp. vesca]	-	-	-	Putative transcription factor MYB-HB-like family OS=Rosa chinensis OX=74649 GN=RchiOBHm_Chr6g0310231 PE=4 SV=1	123.906	171.755	102.458	500.437	641.979	657.851
FvH4_2g32650	1455.84	-1.36296	0.253676	-5.37284	7.7507e-08	1.18917e-06	-	-	-	-	AT1G44920.1	Uncharacterized protein OS=Rosa chinensis OX=74649 GN=RchiOBHm_Chr6g0310081 PE=4 SV=1	1986.77	1924.44	2146.22	679.165	807.241	868.937
FvH4_2g32670	520.319	-1.27055	0.197751	-6.42498	1.31886e-10	3.21651e-09	-	-	GRF6_ORYSJ	Growth-regulating factor 6 OS=Oryza sativa subsp. japonica OX=39947 GN=GRF6 PE=2 SV=2	AT2G22840.1	Putative transcription factor interactor and regulator C3H-WRC/GRF family OS=Rosa chinensis OX=74649 GN=RchiOBHm_Chr6g0310051 PE=4 SV=1	779.752	811.933	645.305	280.32	362.305	284.864
FvH4_2g32700	454.67	4.94863	0.516549	9.58018	9.68736e-22	1.02167e-19	-	-	-	-	-	-	32.0446	83.9257	48.5327	1324.47	2835.94	924.27
FvH4_2g32830	700.989	1.52463	0.435554	3.50043	0.000464515	0.00300469	-	-	-	-	-	Uncharacterized protein OS=Rosa chinensis OX=74649 GN=RchiOBHm_Chr6g0309871 PE=4 SV=1	529.804	772.897	530.265	1888.87	2200.31	1184.54
FvH4_2g32860	383.297	-1.93806	0.358869	-5.40047	6.64666e-08	1.03538e-06	-	-	-	-	-	Uncharacterized protein OS=Citrus sinensis OX=2711 GN=CISIN_1g012236mg PE=3 SV=1	146.337	312.282	371.185	85.6011	55.0873	75.8271
FvH4_2g32900	736.492	-1.97005	0.272434	-7.23128	4.78456e-13	1.68961e-11	-	-	-	-	-	Uncharacterized protein OS=Rosa chinensis OX=74649 GN=RchiOBHm_Chr6g0309821 PE=4 SV=1	709.254	718.248	1151.3	205.066	203.399	250.024
FvH4_2g32910	89.9859	-2.69326	0.73215	-3.67856	0.000234553	0.00164814	-	-	-	-	-	Putative xanthine/uracil/vitamin C permease OS=Rosa chinensis OX=74649 GN=RchiOBHm_Chr6g0309811 PE=4 SV=1	91.8612	109.299	125.826	13.1694	16.9499	20.4938
FvH4_2g33080	574.021	-1.15468	0.300576	-3.84157	0.000122252	0.000929616	-	-	NPGR1_ARATH	Protein NPGR1 OS=Arabidopsis thaliana OX=3702 GN=NPGR1 PE=1 SV=1	AT1G27460.3	Putative tetratricopeptide-like helical domain-containing protein OS=Rosa chinensis OX=74649 GN=RchiOBHm_Chr6g0309631 PE=4 SV=1	569.326	447.929	476.34	190.956	199.162	280.765
FvH4_2g33130	84.5631	-1.1821	0.452436	-2.61274	0.00898197	0.0352312	-	-	FK119_ARATH	F-box/kelch-repeat protein At5g43190 OS=Arabidopsis thaliana OX=3702 GN=At5g43190 PE=2 SV=1	AT5G43190.1	Putative F-box domain, galactose oxidase/kelch, beta-propeller, kelch-type beta propeller OS=Rosa chinensis OX=74649 GN=RchiOBHm_Chr6g0309541 PE=4 SV=1	113.224	85.8775	64.7103	45.1522	36.0186	34.8395
FvH4_2g33160	5737.39	-1.16432	0.268691	-4.3333	1.46891e-05	0.000143321	-	-	DAD2_PETHY	Probable strigolactone esterase DAD2 OS=Petunia hybrida OX=4102 GN=DAD2 PE=1 SV=1	AT3G03990.1	Putative alpha/Beta hydrolase, strigolactone esterase D14 family OS=Rosa chinensis OX=74649 GN=RchiOBHm_Chr6g0309501 PE=4 SV=1	9644.36	6139.26	6304.76	3298.93	3004.38	3551.58
FvH4_2g33250	2874.53	1.83369	0.363817	5.04015	4.65159e-07	6.20203e-06	-	-	-	-	-	Putative transcription factor C2H2 family OS=Rosa chinensis OX=74649 GN=RchiOBHm_Chr6g0309391 PE=4 SV=1	717.799	638.226	481.732	2489.02	2269.17	1791.16
FvH4_2g33380	141.336	1.33155	0.514793	2.58657	0.00969357	0.0375319	gi|470109324|ref|XP_004290949.1|	PREDICTED: uncharacterized protein LOC101306585 [Fragaria vesca subsp. vesca]	TTC1_HUMAN	Tetratricopeptide repeat protein 1 OS=Homo sapiens OX=9606 GN=TTC1 PE=1 SV=1	AT5G43120.2	Putative armadillo-like helical, clathrin, heavy chain OS=Rosa chinensis OX=74649 GN=RchiOBHm_Chr6g0309161 PE=4 SV=1	136.724	158.093	183.346	492.912	235.181	475.456
FvH4_2g33550	37.3148	4.98115	1.29047	3.85994	0.000113415	0.000869197	gi|1358153303|gb|PRQ27782.1|	hypothetical protein RchiOBHm_Chr6g0308941 [Rosa chinensis]	-	-	-	Uncharacterized protein OS=Rosa chinensis OX=74649 GN=RchiOBHm_Chr6g0308941 PE=4 SV=1	10.6815	7.80704	0	188.134	211.874	180.345
FvH4_2g33580	97.414	1.65486	0.442634	3.73865	0.000185008	0.00134064	gi|470113054|ref|XP_004292742.1|	PREDICTED: cytochrome P450 81E8-like [Fragaria vesca subsp. vesca]	C81E1_GLYEC	Isoflavone 2'-hydroxylase OS=Glycyrrhiza echinata OX=46348 GN=CYP81E1 PE=1 SV=2	-	Uncharacterized protein OS=Prunus persica OX=3760 GN=PRUPE_1G428700 PE=3 SV=1	102.543	92.7086	97.0655	306.659	278.615	335.074
FvH4_2g33660	518.621	1.18487	0.348261	3.40224	0.000668368	0.00406138	gi|470109297|ref|XP_004290936.1|	PREDICTED: isoflavone 2'-hydroxylase-like [Fragaria vesca subsp. vesca]	-	-	-	Putative oxidoreductase OS=Rosa chinensis OX=74649 GN=RchiOBHm_Chr6g0308891 PE=4 SV=1	98.2701	103.443	157.282	284.083	223.527	309.456
FvH4_2g33720	861.844	-2.72466	0.354548	-7.68487	1.53152e-14	6.49592e-13	gi|470113181|ref|XP_004292805.1|	PREDICTED: uncharacterized protein LOC101311158 [Fragaria vesca subsp. vesca]	-	-	-	Putative transcription factor MYC/MYB OS=Rosa chinensis OX=74649 GN=RchiOBHm_Chr6g0308831 PE=4 SV=1	1123.7	835.354	1148.61	76.1944	119.709	274.617
FvH4_2g33770	5119.58	-2.85653	0.44449	-6.42653	1.30554e-10	3.18733e-09	gi|470109572|ref|XP_004291067.1|	PREDICTED: probable isoaspartyl peptidase/L-asparaginase 2 [Fragaria vesca subsp. vesca]	-	-	-	Putative asparaginase OS=Rosa chinensis OX=74649 GN=RchiOBHm_Chr6g0308781 PE=4 SV=1	6156.84	7053.66	7605.26	577.572	1675.93	620.962
FvH4_2g33780	745.186	1.49573	0.330433	4.52657	5.99491e-06	6.39448e-05	gi|470109570|ref|XP_004291066.1|	PREDICTED: uncharacterized protein LOC101292566 [Fragaria vesca subsp. vesca]	-	-	-	Uncharacterized protein OS=Rosa chinensis OX=74649 GN=RchiOBHm_Chr6g0308771 PE=4 SV=1	241.403	485.988	605.76	1119.4	1413.2	1229.63
FvH4_2g33810	11199.7	1.27054	0.237375	5.35246	8.67666e-08	1.32429e-06	gi|470109568|ref|XP_004291065.1|	PREDICTED: transcription factor MYB44-like [Fragaria vesca subsp. vesca]	-	-	-	Putative transcription factor MYB-HB-like family OS=Rosa chinensis OX=74649 GN=RchiOBHm_Chr6g0308731 PE=4 SV=1	8145.74	7573.81	7652.89	21969.4	13424.4	20991.8
FvH4_2g33910	24280.3	1.66689	0.301785	5.52343	3.32449e-08	5.49691e-07	gi|470109589|ref|XP_004291075.1|	PREDICTED: cysteine proteinase RD21a [Fragaria vesca subsp. vesca]	-	-	-	Putative actinidain OS=Rosa chinensis OX=74649 GN=RchiOBHm_Chr6g0308501 PE=3 SV=1	13866.8	16086.4	14009.8	48834	38657.5	52103.4
FvH4_2g33920	547.774	1.94343	0.218028	8.91365	4.93813e-19	3.72956e-17	gi|470109591|ref|XP_004291076.1|	PREDICTED: probable WRKY transcription factor 7 [Fragaria vesca subsp. vesca]	WRKY7_ARATH	Probable WRKY transcription factor 7 OS=Arabidopsis thaliana OX=3702 GN=WRKY7 PE=2 SV=1	AT4G24240.2	WRKY transcription factor 9 OS=Fragaria vesca OX=57918 PE=2 SV=1	408.035	443.05	366.692	1635.83	1614.48	1432.52
FvH4_2g33930	570.881	2.68514	0.407829	6.58397	4.58036e-11	1.20494e-09	gi|470109593|ref|XP_004291077.1|	PREDICTED: uncharacterized protein At4g06744-like [Fragaria vesca subsp. vesca]	Y4744_ARATH	Uncharacterized protein At4g06744 OS=Arabidopsis thaliana OX=3702 GN=At4g06744 PE=2 SV=1	AT4G06744.1	Putative leucine-rich repeat domain, L domain-containing protein OS=Rosa chinensis OX=74649 GN=RchiOBHm_Chr6g0308481 PE=4 SV=1	504.169	371.81	309.171	2647.99	1345.4	3626.38
FvH4_2g34060	60.4518	1.85624	0.641685	2.89275	0.00381881	0.0175039	-	-	Y3028_ARATH	Uncharacterized acetyltransferase At3g50280 OS=Arabidopsis thaliana OX=3702 GN=At3g50280 PE=3 SV=1	AT5G42830.1	Putative shikimate O-hydroxycinnamoyltransferase OS=Rosa chinensis OX=74649 GN=RchiOBHm_Chr6g0308421 PE=4 SV=1	38.4535	11.7106	21.5701	86.5418	70.9779	101.444
FvH4_2g34061	612.741	2.10335	0.586929	3.58364	0.000338833	0.00226895	-	-	Y3028_ARATH	Uncharacterized acetyltransferase At3g50280 OS=Arabidopsis thaliana OX=3702 GN=At3g50280 PE=3 SV=1	AT5G07850.1	Putative shikimate O-hydroxycinnamoyltransferase OS=Rosa chinensis OX=74649 GN=RchiOBHm_Chr6g0308291 PE=4 SV=1	336.468	705.562	440.39	3111.74	1907.93	1350.54
FvH4_2g34100	247.259	-1.48933	0.304525	-4.89066	1.00498e-06	1.2529e-05	-	-	SPT_ARATH	Transcription factor SPATULA OS=Arabidopsis thaliana OX=3702 GN=SPT PE=1 SV=1	AT4G36930.1	Putative transcription factor bHLH family OS=Rosa chinensis OX=74649 GN=RchiOBHm_Chr6g0308251 PE=4 SV=1	484.942	423.532	325.349	124.169	112.293	202.889
FvH4_2g34170	1680.65	-2.15588	0.30604	-7.04444	1.8621e-12	5.93161e-11	-	-	SBT19_ARATH	Subtilisin-like protease SBT1.9 OS=Arabidopsis thaliana OX=3702 GN=SBT1.9 PE=2 SV=1	AT5G67090.1	Putative tripeptidyl-peptidase II OS=Rosa chinensis OX=74649 GN=RchiOBHm_Chr6g0308191 PE=4 SV=1	1305.28	1712.67	1785.82	387.557	237.299	452.913
FvH4_2g34180	71.1281	-1.50351	0.507387	-2.96323	0.00304425	0.0145519	-	-	RR5_SPIOL	30S ribosomal protein S5, chloroplastic OS=Spinacia oleracea OX=3562 GN=rps5 PE=1 SV=1	AT2G33800.1	Putative ribosomal protein S5 OS=Rosa chinensis OX=74649 GN=RchiOBHm_Chr5g0008741 PE=3 SV=1	60.8848	69.2875	142.902	25.3981	47.6717	23.5679
FvH4_2g34212	7.46635	6.44607	2.51922	2.55876	0.0105047	0.040063	-	-	SBT19_ARATH	Subtilisin-like protease SBT1.9 OS=Arabidopsis thaliana OX=3702 GN=SBT1.9 PE=2 SV=1	-	Putative tripeptidyl-peptidase II OS=Rosa chinensis OX=74649 GN=RchiOBHm_Chr6g0308201 PE=4 SV=1	0	0	0	38.5675	8.47497	0
FvH4_2g34230	1545.02	-1.86356	0.326226	-5.71247	1.1135e-08	2.00103e-07	-	-	SBT19_ARATH	Subtilisin-like protease SBT1.9 OS=Arabidopsis thaliana OX=3702 GN=SBT1.9 PE=2 SV=1	-	Putative tripeptidyl-peptidase II OS=Rosa chinensis OX=74649 GN=RchiOBHm_Chr6g0308191 PE=4 SV=1	1572.32	1837.58	2399.67	476.92	300.862	818.727
FvH4_2g34340	2547.02	-1.12056	0.230959	-4.85176	1.22374e-06	1.50164e-05	-	-	-	-	-	Uncharacterized protein OS=Rosa chinensis OX=74649 GN=RchiOBHm_Chr6g0308021 PE=4 SV=1	3261.07	2470.93	3358.64	1376.2	1478.88	1325.95
FvH4_2g34420	376.087	1.82086	0.692553	2.6292	0.00855866	0.033803	-	-	ABAH3_ORYSJ	Abscisic acid 8'-hydroxylase 3 OS=Oryza sativa subsp. japonica OX=39947 GN=CYP707A7 PE=2 SV=1	AT3G19270.2	Putative (+)-abscisic acid 8'-hydroxylase OS=Rosa chinensis OX=74649 GN=RchiOBHm_Chr6g0307951 PE=3 SV=1	42.7261	25.3729	23.3676	109.118	72.0373	141.407
FvH4_2g34430	114.105	-1.87667	0.482929	-3.88603	0.000101899	0.000792872	-	-	TRL4_ARATH	Thioredoxin-like 4, chloroplastic OS=Arabidopsis thaliana OX=3702 GN=At1g07700 PE=2 SV=1	-	Putative monodehydroascorbate reductase (NADH) OS=Rosa chinensis OX=74649 GN=RchiOBHm_Chr6g0307941 PE=4 SV=1	107.884	142.479	179.751	44.2116	36.0186	36.8888
FvH4_2g34471	1727.82	-2.73528	0.364259	-7.50916	5.95064e-14	2.35342e-12	gi|764538690|ref|XP_004291112.2|	PREDICTED: chlorophyll a-b binding protein P4, chloroplastic [Fragaria vesca subsp. vesca]	LHCA5_ARATH	Photosystem I chlorophyll a/b-binding protein 5, chloroplastic OS=Arabidopsis thaliana OX=3702 GN=LHCA5 PE=1 SV=1	AT1G45474.2	Chlorophyll a-b binding protein, chloroplastic OS=Rosa chinensis OX=74649 GN=RchiOBHm_Chr6g0307891 PE=3 SV=1	2043.38	2004.46	3335.28	317.006	468.242	323.802
FvH4_2g34520	56.7869	-3.9504	0.884861	-4.46443	8.02821e-06	8.38379e-05	-	-	CML27_ARATH	Probable calcium-binding protein CML27 OS=Arabidopsis thaliana OX=3702 GN=CML27 PE=1 SV=1	AT1G18210.2	Putative EF-hand domain pair protein OS=Rosa chinensis OX=74649 GN=RchiOBHm_Chr6g0307801 PE=4 SV=1	138.86	85.8775	59.3178	3.76269	10.5937	4.09876
FvH4_2g34530	149.594	-3.60944	0.38182	-9.45326	3.28453e-21	3.17771e-19	-	-	CML10_ORYSJ	Probable calcium-binding protein CML10 OS=Oryza sativa subsp. japonica OX=39947 GN=CML10 PE=2 SV=1	-	Uncharacterized protein (Fragment) OS=Fragaria ananassa OX=3747 PE=2 SV=1	279.856	249.825	307.374	22.5761	31.7811	14.3457
FvH4_2g34560	1253.12	-1.07154	0.281089	-3.81211	0.000137788	0.00103332	-	-	BKI1_ARATH	BRI1 kinase inhibitor 1 OS=Arabidopsis thaliana OX=3702 GN=BKI1 PE=1 SV=1	AT5G42750.1	Uncharacterized protein OS=Rosa chinensis OX=74649 GN=RchiOBHm_Chr6g0307761 PE=4 SV=1	1784.88	1763.42	2087.81	998.052	653.632	1029.81
FvH4_2g34580	119.285	-1.37943	0.532684	-2.58958	0.00960936	0.0372613	-	-	Y5270_ARATH	B3 domain-containing protein At5g42700 OS=Arabidopsis thaliana OX=3702 GN=At5g42700 PE=2 SV=2	AT5G42700.1	Putative transcription factor B3-Domain family OS=Rosa chinensis OX=74649 GN=RchiOBHm_Chr6g0307581 PE=4 SV=1	211.494	132.72	227.385	52.6776	99.5809	67.6295
FvH4_2g34660	296.514	-1.04878	0.291718	-3.59518	0.000324167	0.00218284	-	-	-	-	-	Uncharacterized protein OS=Rosa chinensis OX=74649 GN=RchiOBHm_Chr6g0307431 PE=4 SV=1	612.052	404.99	471.846	162.736	344.296	213.136
FvH4_2g34680	702.681	1.2006	0.249965	4.8031	1.56231e-06	1.87101e-05	-	-	-	-	-	Putative carboxylesterase OS=Rosa chinensis OX=74649 GN=RchiOBHm_Chr6g0307411 PE=4 SV=1	529.804	474.278	545.544	1217.23	1027.59	1316.73
FvH4_2g35051	122.92	2.16729	0.539845	4.01465	5.95336e-05	0.000491488	gi|470113239|ref|XP_004292832.1|	PREDICTED: uncharacterized protein LOC101296545 [Fragaria vesca subsp. vesca]	-	-	-	Uncharacterized protein OS=Rosa chinensis OX=74649 GN=RchiOBHm_Chr1g0331391 PE=4 SV=1	53.4077	46.8423	50.3302	246.456	103.818	325.851
FvH4_2g35090	25.9024	-3.39593	1.21036	-2.80571	0.00502055	0.0219419	gi|470113241|ref|XP_004292833.1|	PREDICTED: EPidERMAL PATTERNING FACTOR-like protein 2 isoform X2 [Fragaria vesca subsp. vesca]	EPFL2_ARATH	EPidERMAL PATTERNING FACTOR-like protein 2 OS=Arabidopsis thaliana OX=3702 GN=EPFL2 PE=2 SV=1	AT4G37810.1	Uncharacterized protein OS=Rosa chinensis OX=74649 GN=RchiOBHm_Chr6g0306881 PE=4 SV=1	53.4077	46.8423	50.3302	3.76269	10.5937	0
FvH4_2g35110	971.475	-1.2108	0.317893	-3.80883	0.000139625	0.00104342	gi|470109737|ref|XP_004291147.1|	PREDICTED: RNA polymerase sigma factor sigC [Fragaria vesca subsp. vesca]	-	-	-	Putative RNA polymerase sigma-70 like domain-containing protein OS=Rosa chinensis OX=74649 GN=RchiOBHm_Chr6g0306861 PE=4 SV=1	1219.83	1038.34	1297.8	534.301	430.105	571.777
FvH4_2g35131	1474.08	-1.39902	0.261868	-5.34247	9.16905e-08	1.39128e-06	gi|470109739|ref|XP_004291148.1|	PREDICTED: glutamyl-tRNA(Gln) amidotransferase subunit C, chloroplastic/mitochondrial [Fragaria vesca subsp. vesca]	GATC_VITVI	Glutamyl-tRNA(Gln) amidotransferase subunit C, chloroplastic/mitochondrial OS=Vitis vinifera OX=29760 GN=GATC PE=3 SV=1	AT4G32915.1	Glutamyl-tRNA(Gln) amidotransferase subunit C, chloroplastic/mitochondrial OS=Rosa chinensis OX=74649 GN=GATC PE=3 SV=1	1891.7	1539.94	2170.49	563.462	868.685	692.691
FvH4_2g35230	795.148	-1.00334	0.320557	-3.13	0.00174808	0.00921795	gi|470109752|ref|XP_004291154.1|	PREDICTED: uncharacterized protein LOC101294624 isoform X1 [Fragaria vesca subsp. vesca]	YBEY_ARATH	Endoribonuclease YBEY, chloroplastic OS=Arabidopsis thaliana OX=3702 GN=YBEY PE=1 SV=1	AT2G25870.1	Putative sugar-phosphatase OS=Rosa chinensis OX=74649 GN=RchiOBHm_Chr6g0306701 PE=3 SV=1	692.164	934.894	1033.57	374.387	576.298	377.086
FvH4_2g35260	662.624	2.16706	0.337561	6.41976	1.36486e-10	3.31488e-09	-	-	HSL1_ARATH	Receptor-like protein kinase HSL1 OS=Arabidopsis thaliana OX=3702 GN=HSL1 PE=2 SV=1	AT5G25930.1	Uncharacterized protein OS=Rosa chinensis OX=74649 GN=RchiOBHm_Chr6g0306681 PE=3 SV=1	469.988	614.805	517.682	2727.95	2048.82	2420.32
FvH4_2g35270	464.638	-2.3246	0.507659	-4.57906	4.67078e-06	5.11013e-05	-	-	AAP1_ARATH	Amino acid permease 1 OS=Arabidopsis thaliana OX=3702 GN=AAP1 PE=1 SV=1	AT1G58360.1	Putative amino acid transporter, transmembrane domain-containing protein OS=Rosa chinensis OX=74649 GN=RchiOBHm_Chr6g0306641 PE=4 SV=1	102.543	29.2764	52.1277	5.64403	14.8312	16.395
FvH4_2g35300	1020.76	-1.17412	0.147076	-7.98313	1.42674e-15	6.83115e-14	-	-	SYWM_ARATH	Tryptophan--tRNA ligase, chloroplastic/mitochondrial OS=Arabidopsis thaliana OX=3702 GN=OVA4 PE=1 SV=1	-	Putative tryptophan--tRNA ligase OS=Rosa chinensis OX=74649 GN=RchiOBHm_Chr6g0306611 PE=3 SV=1	1138.65	1348.67	1419.13	515.488	648.335	568.703
FvH4_2g35380	96.0388	-2.82651	0.562522	-5.02471	5.04198e-07	6.67425e-06	-	-	-	-	-	Uncharacterized protein OS=Rosa chinensis OX=74649 GN=RchiOBHm_Chr6g0306531 PE=4 SV=1	106.815	122.961	203.118	35.7455	12.7125	12.2963
FvH4_2g35430	134.84	-2.08392	0.67385	-3.09256	0.00198437	0.010238	gi|764539299|ref|XP_011458983.1|	PREDICTED: uncharacterized protein LOC105349861 [Fragaria vesca subsp. vesca]	-	-	AT4G32860.1	Uncharacterized protein OS=Rosa chinensis OX=74649 GN=RchiOBHm_Chr6g0306461 PE=4 SV=1	303.356	411.822	257.044	60.203	97.4622	71.7283
FvH4_2g35620	603.083	-1.11984	0.22624	-4.94981	7.42846e-07	9.51957e-06	-	-	DREB3_ARATH	Dehydration-responsive element-binding protein 3 OS=Arabidopsis thaliana OX=3702 GN=DREB3 PE=2 SV=1	AT5G11590.1	Putative transcription factor AP2-EREBP family OS=Rosa chinensis OX=74649 GN=RchiOBHm_Chr6g0306191 PE=4 SV=1	1053.2	1007.11	819.664	460.929	407.858	455.987
FvH4_2g35700	3261.05	1.29643	0.308795	4.19836	2.68856e-05	0.0002456	-	-	TIP41_ARATH	Aquaporin TIP4-1 OS=Arabidopsis thaliana OX=3702 GN=TIP4-1 PE=2 SV=1	-	Putative major intrinsic protein OS=Rosa chinensis OX=74649 GN=RchiOBHm_Chr6g0306101 PE=3 SV=1	2772.93	2256.24	2158.81	4906.54	5879.51	6868.5
FvH4_2g35710	618.389	-1.59719	0.228524	-6.98919	2.76484e-12	8.60813e-11	-	-	-	-	-	Lactoylglutathione lyase OS=Rosa chinensis OX=74649 GN=RchiOBHm_Chr6g0306071 PE=3 SV=1	869.477	765.09	956.274	250.219	275.437	330.975
FvH4_2g35741	50.3458	-1.38661	0.501952	-2.76243	0.00573724	0.0244052	-	-	-	-	-	Uncharacterized protein OS=Prunus persica OX=3760 GN=PRUPE_1G450100 PE=4 SV=1	39.5217	67.3358	47.634	13.1694	34.9593	11.2716
FvH4_2g35750	162.282	-1.95888	0.335378	-5.84079	5.19527e-09	9.86512e-08	-	-	-	-	-	Putative adenosylhomocysteine nucleosidase OS=Rosa chinensis OX=74649 GN=RchiOBHm_Chr1g0336711 PE=4 SV=1	180.518	171.755	268.727	43.2709	63.5623	53.2839
FvH4_2g35760	196.796	-1.78457	0.713769	-2.50021	0.0124119	0.0459375	-	-	-	-	-	Putative adenosylhomocysteine nucleosidase OS=Rosa chinensis OX=74649 GN=RchiOBHm_Chr6g0306021 PE=4 SV=1	304.424	296.668	364.894	84.6604	95.3434	100.42
FvH4_2g35762	161.627	-5.79785	0.814762	-7.11601	1.11099e-12	3.67915e-11	-	-	-	-	-	Putative adenosylhomocysteine nucleosidase OS=Rosa chinensis OX=74649 GN=RchiOBHm_Chr1g0336711 PE=4 SV=1	79.0434	167.851	399.047	11.2881	0	0
FvH4_2g35860	299.7	-1.91542	0.457692	-4.18494	2.85237e-05	0.000258147	-	-	-	-	-	Putative aminoacyltransferase, E1 ubiquitin-activating enzyme OS=Rosa chinensis OX=74649 GN=RchiOBHm_Chr6g0305961 PE=4 SV=1	386.672	484.037	310.969	86.5418	103.818	122.963
FvH4_2g36010	394.498	1.01943	0.362074	2.81554	0.00486958	0.0214066	gi|470109847|ref|XP_004291199.1|	PREDICTED: tetraspanin-19-like isoform X1 [Fragaria vesca subsp. vesca]	TET19_ARATH	Tetraspanin-19 OS=Arabidopsis thaliana OX=3702 GN=TOM2AH3 PE=2 SV=1	AT2G20740.1	Uncharacterized protein OS=Rosa chinensis OX=74649 GN=RchiOBHm_Chr6g0305861 PE=4 SV=1	56.6121	97.5881	102.458	147.685	211.874	161.901
FvH4_2g36100	12.4265	3.59095	1.30826	2.74483	0.00605428	0.0255311	gi|470113294|ref|XP_004292859.1|	PREDICTED: protein VARIATION IN COMPOUND TRIGGERED ROOT growth response-like [Fragaria vesca subsp. vesca]	TIR_ARATH	Toll/interleukin-1 receptor-like protein OS=Arabidopsis thaliana OX=3702 GN=TIR PE=1 SV=1	AT1G72890.1	Putative TIR domain-containing protein OS=Rosa chinensis OX=74649 GN=RchiOBHm_Chr6g0276291 PE=4 SV=1	4.27261	3.90352	0	30.1015	52.9686	14.3457
FvH4_2g36371	119.591	1.56278	0.547615	2.8538	0.00431997	0.0193725	gi|470110056|ref|XP_004291303.1|	PREDICTED: calmodulin-like protein 7 [Fragaria vesca subsp. vesca]	CML42_ARATH	Calcium-binding protein CML42 OS=Arabidopsis thaliana OX=3702 GN=CML42 PE=1 SV=1	AT4G20780.1	Uncharacterized protein OS=Prunus persica OX=3760 GN=PRUPE_1G455200 PE=4 SV=1	89.7249	68.3116	120.433	274.676	349.593	198.79
FvH4_2g36430	253.567	1.688	0.362699	4.654	3.25551e-06	3.67508e-05	gi|764539783|ref|XP_011459017.1|	PREDICTED: uncharacterized protein LOC101314623 [Fragaria vesca subsp. vesca]	AX15A_SOYBN	Auxin-induced protein 15A OS=Glycine max OX=3847 PE=2 SV=1	AT2G24400.1	Putative small auxin-up RNA OS=Rosa chinensis OX=74649 GN=RchiOBHm_Chr6g0305471 PE=4 SV=1	175.177	242.994	344.223	893.638	907.881	656.826
FvH4_2g36440	410.888	-2.25558	0.306819	-7.35149	1.96008e-13	7.26127e-12	gi|470110064|ref|XP_004291307.1|	PREDICTED: uncharacterized protein LOC101315200 [Fragaria vesca subsp. vesca]	-	-	AT2G24395.1	Putative Heat shock protein DnaJ, cysteine-rich OS=Rosa chinensis OX=74649 GN=RchiOBHm_Chr6g0305461 PE=4 SV=1	674.005	404.015	577	118.525	72.0373	155.753
FvH4_2g36470	1001.51	-1.0697	0.264207	-4.04872	5.14975e-05	0.000431227	gi|470110044|ref|XP_004291297.1|	PREDICTED: protein AIG2-like [Fragaria vesca subsp. vesca]	AIGLD_ARATH	AIG2-like protein D OS=Arabidopsis thaliana OX=3702 GN=AIG2LD PE=2 SV=1	AT2G24390.1	Putative gamma-glutamyl cyclotransferase OS=Rosa chinensis OX=74649 GN=RchiOBHm_Chr6g0305411 PE=4 SV=1	1125.83	897.81	1345.43	459.988	690.71	454.962
FvH4_2g36670	713.946	-1.71923	0.196218	-8.76182	1.92127e-18	1.31145e-16	-	-	-	-	-	Putative tetratricopeptide-like helical domain-containing protein OS=Rosa chinensis OX=74649 GN=RchiOBHm_Chr6g0305021 PE=4 SV=1	1029.7	962.218	1114.46	248.337	384.552	311.506
FvH4_2g36730	3604.23	1.06242	0.216001	4.9186	8.71673e-07	1.10316e-05	-	-	-	-	-	Putative transcription factor WRKY family OS=Rosa chinensis OX=74649 GN=RchiOBHm_Chr6g0305101 PE=4 SV=1	3413.82	3495.6	3027	7527.25	6222.75	7000.68
FvH4_2g36751	93.5635	3.97258	0.655111	6.06398	1.32794e-09	2.7563e-08	-	-	-	-	-	Putative Calmodulin-binding domain, plant OS=Rosa chinensis OX=74649 GN=RchiOBHm_Chr6g0304991 PE=4 SV=1	14.9542	35.1317	23.3676	436.471	338.999	379.135
FvH4_2g36810	129.432	-1.57319	0.507181	-3.10183	0.00192328	0.00996013	gi|470113346|ref|XP_004292885.1|	PREDICTED: disease resistance protein At4g27190-like isoform X1 [Fragaria vesca subsp. vesca]	DRL27_ARATH	Disease resistance protein At4g27190 OS=Arabidopsis thaliana OX=3702 GN=At4g27190 PE=2 SV=1	AT4G27190.1	Putative P-loop containing nucleoside triphosphate hydrolase, leucine-rich repeat domain, L OS=Rosa chinensis OX=74649 GN=RchiOBHm_Chr5g0061661 PE=4 SV=1	226.449	268.367	177.055	99.7112	57.2061	68.6542
FvH4_2g36931	2113.46	-1.11281	0.266237	-4.17977	2.91799e-05	0.000263068	-	-	AB1K1_ARATH	Protein ACTIVITY OF BC1 COMPLEX KINASE 1, chloroplastic OS=Arabidopsis thaliana OX=3702 GN=ABC1K1 PE=1 SV=1	AT4G31390.1	Putative cadmium-transporting ATPase OS=Rosa chinensis OX=74649 GN=RchiOBHm_Chr6g0304841 PE=4 SV=1	3321.96	2591.94	3247.2	1382.79	1328.45	1524.74
FvH4_2g36950	2662.22	-2.96458	0.261001	-11.3585	6.72859e-30	1.77007e-27	-	-	MYB3_ARATH	Transcription factor MYB3 OS=Arabidopsis thaliana OX=3702 GN=MYB3 PE=1 SV=1	AT1G22640.1	MYB domain class transcription factor OS=Fragaria vesca OX=57918 GN=MYB33 PE=2 SV=1	3498.2	4620.79	3902.39	496.674	542.398	501.073
FvH4_2g37120	272.693	1.6949	0.525567	3.2249	0.00126016	0.00700647	-	-	-	-	-	Putative histidine kinase response regulator and transcription factor RR-A-type family OS=Rosa chinensis OX=74649 GN=RchiOBHm_Chr6g0304671 PE=4 SV=1	262.766	298.619	384.667	968.891	940.722	1153.8
FvH4_2g37170	44.9989	3.09296	0.929922	3.32605	0.000880866	0.00513261	gi|470113380|ref|XP_004292902.1|	PREDICTED: glutamate receptor 2.7-like isoform X1 [Fragaria vesca subsp. vesca]	GLR27_ARATH	Glutamate receptor 2.7 OS=Arabidopsis thaliana OX=3702 GN=GLR2.7 PE=2 SV=3	AT2G29120.1	Glutamate receptor OS=Rosa chinensis OX=74649 GN=RchiOBHm_Chr6g0304511 PE=3 SV=1	12.8178	23.4211	10.7851	139.219	112.293	149.605
FvH4_2g37190	727.964	-1.26402	0.285556	-4.42652	9.57677e-06	9.81703e-05	gi|764540336|ref|XP_004292903.2|	PREDICTED: pheophytinase, chloroplastic [Fragaria vesca subsp. vesca]	PPH_ARATH	Pheophytinase, chloroplastic OS=Arabidopsis thaliana OX=3702 GN=PPH PE=1 SV=1	AT5G38520.1	Putative chlorophyllase OS=Rosa chinensis OX=74649 GN=RchiOBHm_Chr6g0304501 PE=4 SV=1	862	779.729	958.971	278.439	390.908	413.975
FvH4_2g37300	762.48	-1.28524	0.381332	-3.3704	0.000750605	0.00447931	gi|470109947|ref|XP_004291249.1|	PREDICTED: ABC transporter G family member 14 [Fragaria vesca subsp. vesca]	AB14G_ARATH	ABC transporter G family member 14 OS=Arabidopsis thaliana OX=3702 GN=ABCG14 PE=2 SV=1	AT1G31770.1	Putative fe(3+)-transporting ATPase OS=Rosa chinensis OX=74649 GN=RchiOBHm_Chr6g0304401 PE=4 SV=1	1580.87	1721.45	1231.29	523.013	529.686	807.456
FvH4_2g37320	10899.8	-1.16177	0.324155	-3.58399	0.000338382	0.00226702	gi|470109905|ref|XP_004291228.1|	PREDICTED: BTB/POZ domain-containing protein At2g30600 [Fragaria vesca subsp. vesca]	Y2060_ARATH	BTB/POZ domain-containing protein At2g30600 OS=Arabidopsis thaliana OX=3702 GN=At2g30600/At2g30610 PE=2 SV=1	AT2G30600.4	Putative chromatin remodeling & transcription regulator BTB-POZ family OS=Rosa chinensis OX=74649 GN=RchiOBHm_Chr6g0304381 PE=4 SV=1	15282.1	14250.8	14861.8	6644.9	6474.88	6722.99
FvH4_2g37340	612.226	-1.1671	0.357866	-3.26127	0.00110914	0.00627035	gi|470109998|ref|XP_004291274.1|	PREDICTED: cytochrome P450 CYP736A12-like [Fragaria vesca subsp. vesca]	C7A12_PANGI	Cytochrome P450 CYP736A12 OS=Panax ginseng OX=4054 PE=2 SV=1	AT4G36220.1	Putative flavonoid 3'-monooxygenase OS=Rosa chinensis OX=74649 GN=RchiOBHm_Chr6g0280191 PE=3 SV=1	888.704	952.459	943.692	347.108	460.827	432.419
FvH4_2g37381	1342.02	1.84883	0.305865	6.04461	1.49767e-09	3.09762e-08	gi|470109899|ref|XP_004291225.1|	PREDICTED: 1,4-alpha-glucan-branching enzyme 1, chloroplastic/amyloplastic-like [Fragaria vesca subsp. vesca]	GLGB2_PEA	1,4-alpha-glucan-branching enzyme 1, chloroplastic/amyloplastic (Fragment) OS=Pisum sativum OX=3888 GN=SBEII PE=1 SV=1	-	Putative 1,4-alpha-glucan branching enzyme OS=Rosa chinensis OX=74649 GN=RchiOBHm_Chr6g0304311 PE=4 SV=1	336.468	350.341	571.608	2064.77	984.156	1485.8
FvH4_2g37410	10065.8	1.60309	0.244269	6.56278	5.28136e-11	1.36633e-09	gi|470109895|ref|XP_004291223.1|	PREDICTED: 1,4-alpha-glucan-branching enzyme 1, chloroplastic/amyloplastic-like [Fragaria vesca subsp. vesca]	-	-	-	Putative 1,4-alpha-glucan branching enzyme OS=Rosa chinensis OX=74649 GN=RchiOBHm_Chr6g0304311 PE=4 SV=1	5899.41	6250.51	7584.59	24884.5	13935	21133.2
FvH4_2g37520	2089.26	-1.10927	0.188913	-5.87184	4.30982e-09	8.31184e-08	gi|764540547|ref|XP_011459080.1|	PREDICTED: uncharacterized protein LOC101304060 isoform X2 [Fragaria vesca subsp. vesca]	-	-	-	Uncharacterized protein OS=Rosa chinensis OX=74649 GN=RchiOBHm_Chr6g0304221 PE=4 SV=1	2832.74	2629.02	3206.75	1371.5	1279.72	1366.94
FvH4_2g37530	6371.61	-1.15306	0.384781	-2.99667	0.0027295	0.0132998	gi|470113407|ref|XP_004292915.1|	PREDICTED: uncharacterized protein LOC101299355 isoform X2 [Fragaria vesca subsp. vesca]	-	-	AT1G42430.1	Uncharacterized protein OS=Rosa chinensis OX=74649 GN=RchiOBHm_Chr6g0304201 PE=4 SV=1	6821.23	6542.3	6053.11	2333.81	4174.98	2222.55
FvH4_2g37590	112.464	2.7087	0.409677	6.61179	3.79699e-11	1.01021e-09	gi|470113411|ref|XP_004292917.1|	PREDICTED: uncharacterized protein LOC101299932 [Fragaria vesca subsp. vesca]	NRG2_ARATH	Nitrate regulatory gene2 protein OS=Arabidopsis thaliana OX=3702 GN=NRG2 PE=1 SV=1	AT4G35240.4	Uncharacterized protein OS=Rosa chinensis OX=74649 GN=RchiOBHm_Chr6g0304141 PE=4 SV=1	66.2255	40.987	62.9128	314.184	328.405	469.308
FvH4_2g37660	104.469	1.26418	0.439875	2.87395	0.00405376	0.01839	gi|470113417|ref|XP_004292920.1|	PREDICTED: lysine histidine transporter-like 8 [Fragaria vesca subsp. vesca]	LHTL8_ARATH	Lysine histidine transporter-like 8 OS=Arabidopsis thaliana OX=3702 GN=AATL1 PE=1 SV=1	AT1G47670.1	Putative amino acid transporter, transmembrane domain-containing protein OS=Rosa chinensis OX=74649 GN=RchiOBHm_Chr6g0304071 PE=4 SV=1	64.0892	66.3599	94.3692	212.592	186.449	141.407
FvH4_2g37870	577.785	1.591	0.338521	4.69984	2.60361e-06	3.00139e-05	-	-	-	-	-	Mechanosensitive ion channel protein OS=Rosa chinensis OX=74649 GN=RchiOBHm_Chr6g0303751 PE=3 SV=1	403.762	318.137	361.299	901.163	1093.27	1268.57
FvH4_2g37880	880.812	2.84727	0.539598	5.27665	1.31567e-07	1.94468e-06	gi|764540723|ref|XP_011459087.1|	PREDICTED: RGS domain-containing serine/threonine-protein kinase A-like isoform X1 [Fragaria vesca subsp. vesca]	STY46_ARATH	Serine/threonine-protein kinase STY46 OS=Arabidopsis thaliana OX=3702 GN=STY46 PE=1 SV=1	AT4G38470.3	Putative dual-specificity kinase TKL-Pl-4 family OS=Rosa chinensis OX=74649 GN=RchiOBHm_Chr6g0303741 PE=4 SV=1	288.402	618.708	357.704	2799.44	3926.03	2377.28
FvH4_2g37910	1739.59	1.84221	0.35659	5.16619	2.38913e-07	3.36766e-06	gi|470110098|ref|XP_004291324.1|	PREDICTED: uncharacterized protein LOC101296167 [Fragaria vesca subsp. vesca]	MF14A_MOUSE	Hippocampus abundant transcript 1 protein OS=Mus musculus OX=10090 GN=Mfsd14a PE=2 SV=3	AT5G42210.1	Putative major facilitator superfamily OS=Rosa chinensis OX=74649 GN=RchiOBHm_Chr6g0303701 PE=4 SV=1	64.0892	37.0835	41.3427	199.422	203.399	106.568
FvH4_2g38020	1087.42	2.75846	0.330183	8.35435	6.57966e-17	3.71204e-15	-	-	NRX2_ORYSJ	Probable nucleoredoxin 2 OS=Oryza sativa subsp. japonica OX=39947 GN=Os01g0794400 PE=2 SV=1	AT1G60420.1	Uncharacterized protein OS=Rosa chinensis OX=74649 GN=RchiOBHm_Chr6g0303591 PE=4 SV=1	399.49	534.783	352.312	3356.32	2092.26	3256.47
FvH4_2g38030	4523.05	1.29864	0.237822	5.46058	4.74578e-08	7.60006e-07	-	-	-	-	AT1G20225.1	Putative thioredoxin-like protein OS=Rosa chinensis OX=74649 GN=RchiOBHm_Chr6g0303571 PE=4 SV=1	3866.72	3829.36	4047.99	11009.6	9125.43	8754.95
FvH4_2g38040	1345.34	4.03961	0.872534	4.62974	3.66119e-06	4.08772e-05	-	-	EXP11_ARATH	Expansin-A11 OS=Arabidopsis thaliana OX=3702 GN=EXPA11 PE=2 SV=1	AT1G20190.1	Expansin OS=Rosa chinensis OX=74649 GN=RchiOBHm_Chr6g0303551 PE=3 SV=1	277.72	468.423	562.62	8115.17	8994.07	4415.39
FvH4_2g38112	636.227	-2.27573	0.313931	-7.24914	4.19441e-13	1.49911e-11	-	-	EXL3_ARATH	GDSL esterase/lipase EXL3 OS=Arabidopsis thaliana OX=3702 GN=EXL3 PE=2 SV=1	AT1G75900.1	Putative triacylglycerol lipase OS=Rosa chinensis OX=74649 GN=RchiOBHm_Chr6g0303411 PE=3 SV=1	410.171	353.269	264.234	37.6269	91.106	84.0246
FvH4_2g38120	9243.26	-1.14436	0.215652	-5.3065	1.11753e-07	1.66761e-06	-	-	EXL3_ARATH	GDSL esterase/lipase EXL3 OS=Arabidopsis thaliana OX=3702 GN=EXL3 PE=2 SV=1	-	Putative triacylglycerol lipase OS=Rosa chinensis OX=74649 GN=RchiOBHm_Chr6g0303381 PE=3 SV=1	8056.02	7795.33	8000.71	3623.47	2313.67	4852.93
FvH4_2g38200	435.685	-1.25831	0.31936	-3.94009	8.14505e-05	0.000651743	-	-	-	-	-	Uncharacterized protein OS=Prunus persica OX=3760 GN=PRUPE_1G363000 PE=4 SV=1	467.851	435.243	339.729	222.939	120.768	175.222
FvH4_2g38230	1430.63	-1.03072	0.283211	-3.63941	0.000273267	0.001879	-	-	-	-	-	Putative transferase, protein kinase RLK-Pelle-LRR-XI-1 family OS=Rosa chinensis OX=74649 GN=RchiOBHm_Chr6g0303151 PE=3 SV=1	1484.73	1633.62	1358.92	750.656	559.348	881.233
FvH4_2g38320	1707.29	-1.04827	0.339172	-3.09066	0.00199711	0.0102947	gi|764541029|ref|XP_004291353.2|	PREDICTED: thaumatin-like protein 1b [Fragaria vesca subsp. vesca]	THLP1_ARATH	Thaumatin-like protein 1 OS=Arabidopsis thaliana OX=3702 GN=TLP1 PE=2 SV=1	AT1G20030.1	Putative thaumatin OS=Rosa chinensis OX=74649 GN=RchiOBHm_Chr6g0303041 PE=4 SV=1	976.293	1239.37	1004.81	413.895	597.486	546.16
FvH4_2g38340	5904.42	-3.09453	0.267148	-11.5836	4.99025e-31	1.53733e-28	gi|470110161|ref|XP_004291355.1|	PREDICTED: chaperone protein dnaJ 11, chloroplastic-like [Fragaria vesca subsp. vesca]	DNJ11_ARATH	Chaperone protein dnaJ 11, chloroplastic OS=Arabidopsis thaliana OX=3702 GN=ATJ11 PE=1 SV=2	AT4G36040.1	Putative DnaJ domain-containing protein OS=Rosa chinensis OX=74649 GN=RchiOBHm_Chr6g0303011 PE=4 SV=1	11547.8	8288.15	8193.04	1121.28	743.679	1416.12
FvH4_2g38410	426.067	-1.30292	0.265072	-4.91532	8.86372e-07	1.11814e-05	gi|764548675|ref|XP_011459840.1|	PREDICTED: uncharacterized protein LOC101306110 [Fragaria vesca subsp. vesca]	-	-	-	Uncharacterized protein OS=Rosa chinensis OX=74649 GN=RchiOBHm_Chr6g0302891 PE=4 SV=1	784.025	579.673	629.128	265.269	290.268	252.074
FvH4_2g38450	2695.83	7.20744	0.360647	19.9847	7.47782e-89	1.75078e-84	gi|470113473|ref|XP_004292948.1|	PREDICTED: probable alkaline/neutral invertase B [Fragaria vesca subsp. vesca]	INVB_ARATH	Probable alkaline/neutral invertase B OS=Arabidopsis thaliana OX=3702 GN=INVB PE=1 SV=1	AT4G34860.3	Putative beta-fructofuranosidase OS=Rosa chinensis OX=74649 GN=RchiOBHm_Chr6g0302851 PE=4 SV=1	55.544	130.768	136.611	15903	15732.7	16188.1
[truncated: 2,876 more rows]

## Sheet: Supplementary Table S4
Supplementary Table S4. List of up- and down-regulated genes after 5-day picloram treatment in fvafb5.
Geneid	baseMean	log2FoldChange	lfcSE	stat	pvalue	padj
FvH4_3g06720	2904.54	-2.64599	0.415991	-6.36067	2.00869e-10	5.55484e-06
[truncated: 1 more rows]

## Sheet: Supplementary Table S5
Supplementary Table S5. GO enrichment analysis of in stage2 of fruit development fvafb5 activated up-regulation DEGs.
[truncated: 78 more rows]

[truncated: 2 more sheets: Supplementary Table S6, Supplementary Table S7]
